# Supplementary material
Source: publisher figshare collection journal article supplement (https://sage.figshare.com/ndownloader/files/12918353)
Supplement: Supplementary file 1 [file 12918353]

FINAL Anatomic Pathology Report

| Study Title | 2-Year Oral Gavage Carcinogenicity Study of Benzonatate in Wistar Rats |
| --- | --- |
| Principal Investigator | Richard G. LaRock, DVM, Diplomate, ACVP |
| Test Facility | Covance Laboratories Inc. 3301 Kinsman Boulevard Madison, Wisconsin 53704-2523 United States of America |
| Covance Study Number | 8256264 |
| Sponsor | Pfizer Consumer Healthcare 5 Giralda Farms Madison, New Jersey 07940 United States of America |
| Sponsor Reference Number | BT-11-45 |
| Report Issue Date | 09 September 2014 |
| Page Number | 1 of 1312 |

Table of Contents

Table of Contents [2](#__RefHeading___Toc396900728)

Compliance Statement and Signature Page [3](#__RefHeading___Toc396900729)

1. Summary [4](#__RefHeading___Toc396900730)

2. Methods [4](#__RefHeading___Toc396900731)

3. Results and Discussion [5](#__RefHeading___Toc396900732)

3.1 Mortality [5](#__RefHeading___Toc396900733)

3.2 Macroscopic Observations [5](#__RefHeading___Toc396900734)

3.3 Microscopic Observations [5](#__RefHeading___Toc396900735)

3.3.1 Neoplasms and Hyperplasia [5](#__RefHeading___Toc396900736)

3.3.2 Nonneoplastic Findings [6](#__RefHeading___Toc396900737)

4. Associated Study Information [7](#__RefHeading___Toc396900738)

4.1 References [8](#__RefHeading___Toc396900739)

4.2 Abbreviations [9](#__RefHeading___Toc396900740)

4.3 Comments on the Data [10](#__RefHeading___Toc396900741)

5. Summary Tables [11](#__RefHeading___Toc396900742)

Table 5.1: Incidence of Macroscopic Observations - Terminal Euthanasia (Dosing Phase) [12](#__RefHeading___Toc396900743)

Table 5.2: Incidence of Macroscopic Observations - Unscheduled Euthanasias and Deaths [23](#__RefHeading___Toc396900744)

Table 5.3: Incidence of Macroscopic Observations - All Animals [38](#__RefHeading___Toc396900745)

Table 5.4: Incidence of Microscopic Observations - Terminal Euthanasia (Dosing Phase) [57](#__RefHeading___Toc396900746)

Table 5.5: Incidence of Microscopic Observations - Unscheduled Euthanasias and Deaths [77](#__RefHeading___Toc396900747)

Table 5.6: Incidence of Microscopic Observations - All Animals [102](#__RefHeading___Toc396900748)

Table 5.7: Summary of Severity for Selected Microscopic Observations - Terminal Euthanasia (Dosing Phase) [135](#__RefHeading___Toc396900749)

Table 5.8: Summary of Severity for Selected Microscopic Observations - Unscheduled Euthanasias and Deaths [204](#__RefHeading___Toc396900750)

Table 5.9: Summary of Severity for Selected Microscopic Observations - All Animals [286](#__RefHeading___Toc396900751)

6. Individual Animal Data Tables [386](#__RefHeading___Toc396900752)

Table 6.1: Individual Animal Data [387](#__RefHeading___Toc396900753)

Compliance Statement and Signature Page

Except listed as follows, the anatomic pathology evaluation and report for this study were completed in accordance protocol-specified Good Laboratory Practice regulations.

- The historical data referenced were generated by a software system that does not meet current validation standards.

In the opinion of the principal investigator for anatomic pathology, this exception does not affect the interpretation of the microscopic data.

|  |  |  |
| --- | --- | --- |
| Richard G. LaRock, DVM, Diplomate, ACVP Anatomic Pathologist |  | Date |

# Summary

The purpose of this report is to describe the anatomic pathology findings through the end of the dosing phase for Covance Study No. 8256264. The purpose of this study was to evaluate the carcinogenic potential and determine the toxicokinetics of the test article, benzonatate, when administered daily via oral gavage to Wistar rats for at least 104 weeks. Males were given 10, 30, or 90 mg/kg/day, and females were given 5, 15, or 50 mg/kg/day.

Administration of benzonatate had no effect on mortality or macroscopic findings. No neoplastic or nonneoplastic microscopic findings were test article-related. No dose dependent statistically significant increased incidence of neoplasia was observed.

# Methods

Male and female Wistar rats were assigned to groups and administered vehicle control or test article, benzonatate, as indicated in the following table. Each group received a dose formulation of benzonatate in the vehicle control article (reverse osmosis water) at a dose level of 0, 10, 30, or 90 mg/kg/day for males and 0, 5, 15, or 50 mg/kg/day for females. Animals were dosed via daily oral gavage.

The study design is shown in the table as follows.

| Group | Subgroup | No. of Animals | | Dose Level (mg/kg/day) | | Dose Concentrationa (mg/mL) | |
| --- | --- | --- | --- | --- | --- | --- | --- |
| Male | Female | Males | Females | Males | Females |
| 1 (Control)b | 1 (Carcinogenicity) | 55 | 55 | 0 | 0 | 0 | 0 |
|  | 2 (Toxicokinetic) | 3 | 3 | 0 | 0 | 0 | 0 |
| 2 (Low) | 1 (Carcinogenicity) | 50 | 50 | 10 | 5 | 2.0 | 1.0 |
|  | 2 (Toxicokinetic) | 9 | 9 | 10 | 5 | 2.0 | 1.0 |
| 3 (Mid) | 1 (Carcinogenicity) | 50 | 50 | 30 | 15 | 6.0 | 3.0 |
|  | 2 (Toxicokinetic) | 9 | 9 | 30 | 15 | 6.0 | 3.0 |
| 4 (High) | 1 (Carcinogenicity) | 55 | 55 | 90 | 50 | 18.0 | 10.0 |
|  | 2 (Toxicokinetic) | 9 | 9 | 90 | 50 | 18.0 | 10.0 |
| a Concentrations were corrected for lot specific purity of 99.87%. A correction factor of 1.0013 was used.  b Group 1 received the vehicle control article only. | | | | | | | |

At unscheduled and scheduled necropsies, macroscopic observations were recorded. Protocol‑specified tissues (when present) from each animal were preserved in the appropriate fixative, embedded in paraffin, sectioned, and stained, and slides were examined microscopically. Following completion of the primary microscopic evaluation, a peer review evaluation was performed. This report represents a consensus between the principal investigator for anatomic pathology and peer review pathologist.

# Results and Discussion

## Mortality

Administration of benzonatate had no effect on survival (Text Table 3.1). Prior to the terminal euthanasia, a total of 202 carcinogenicity animals (94 males and 108 females) were euthanized in moribund condition or found dead through Day 729 of the dosing phase. The percent survival in treated males given 10 through 90 mg/kg/day was dose‑independent and similar to that observed in control males. The percent survival in females given 5‑ 50 mg/kg/day exhibited a mild increasing dose‑dependent trend. However, in each sex, the differences between control and treated survival were small and not considered test article-related. In addition, no test article-related effect was observed in the cause of death or moribundity (death comment) determined by pathology data and microscopic evaluation of animals from unscheduled necropsies.

Text Table 3.1: Percentage Survival Prior to Terminal Sacrifice

| Benzonatate (mg/kg/day) | Males | | | | Females | | | |
| --- | --- | --- | --- | --- | --- | --- | --- | --- |
| 0 | 10 | 30 | 90 | 0 | 5 | 15 | 50 |
| Number of Animals | 55 | 50 | 50 | 55 | 55 | 50 | 50 | 55 |
| Percentage Survival | 60 | 48 | 62 | 51 | 45 | 46 | 48 | 55 |

## Macroscopic Observations

Macroscopic observation data are summarized in Table 5.1, Table 5.2, and Table 5.3; individual data are listed in Table 6.10.

No test article-related macroscopic findings were observed. A small number of tissues had an increased incidence of macroscopic findings at some dose levels. None were considered test article‑related because a dose relationship was lacking, the increase in incidence was small, and no microscopic correlate was found or when present, the microscopic correlate was not test article-related. The remaining macroscopic findings were background incidental findings and not test article-related.

## Microscopic Observations

Microscopic observation data are summarized in Table 5.4, Table 5.5, and Table 5.6; severity of selected microscopic observation data is summarized in Table 5.7, Table 5.8, and Table 5.9. Individual data are listed in Table 6.10.

### Neoplasms and Hyperplasia

A minimal increased incidence of neoplastic/hyperplastic microscopic findings was observed in the heart (Text Table 3.2).

At 50 mg/kg/day, endocardial hyperplasia was noted in one female, malignant endocardial schwannoma was noted in one female, and benign endocardial schwannoma was noted in one female. These higher incidences of these neoplasms were not statistically significant. Endocardial hyperplasia was noted in one male given 30 mg/kg/day and in one male given 90 mg/kg/day. Males did not have heart neoplasms. None of these findings were observed in control animals. However, in 400 control females and 399 control males in three similar studies in Wistar rats at Covance‑Madison, the maximum incidence in each study of endocardial hyperplasia was 1.67% in females and 0.83% in males. This incidence is similar to that seen in this study. Endocardial hyperplasia is a background finding in this strain (McInnes, 2012a), indicating endocardial hyperplasia was not test article-related but rather attributed to normal variation of a background finding. In addition, malignant and benign endocardial schwannomas were each observed with a 2% incidence in 490 control male Wistar rats in similar studies at Covance‑Madison in 2006-2010. These neoplasms were not seen in females in the historical control database. However, because the numbers of these tumors in this study was low and statistically insignificant, the tumors were unlikely related to the administration of benzonatate but rather due to spontaneous occurrence of background neoplasia.

Text Table 3.2: Incidence of Neoplastic/Hyperplastic Microscopic Findings - Scheduled and Unscheduled Necropsies

| Sex | Benzonatate | | | | | | | |
| --- | --- | --- | --- | --- | --- | --- | --- | --- |
| Males | | | | Females | | | |
| Dose Level (mg/kg/day) | 0 | 10 | 30 | 90 | 0 | 5 | 15 | 50 |
| Heart | | | | | | | | |
| Hyperplasia, endocardium |  |  |  |  |  |  |  |  |
| Moderate | 0 | 0 | 1 | 1 | 0 | 0 | 0 | 1 |
| Malignant endocardial schwannoma |  |  |  |  |  |  |  |  |
| Present | 0 | 0 | 0 | 0 | 0 | 0 | 0 | 1 |
| Benign endocardial schwannoma |  |  |  |  |  |  |  |  |
| Present | 0 | 0 | 0 | 0 | 0 | 0 | 0 | 1 |

Statistically increased incidences of some neoplastic lesions were noted in the low dose groups (10 mg/kg/day in males and 5 mg/kg/day in females). The incidences of these tumors in the higher dose groups were not statistically significantly increased. The increase in these tumors in the low dose groups was therefore considered incidental due to biologic variability and not related to benzonatate administration.

### Nonneoplastic Findings

Minimally increased incidence of retinal atrophy was observed in males given ≥30 mg/kg/day. This was not considered test article-related because the average severity score of retinal atrophy was similar in all dose groups; including controls. Also, retinal atrophy is a common background finding in older rats compounded by varying exposure to light (McInnes, 2012b). Finally in three similar studies with 395 males done at Covance, the maximum incidence of retina atrophy in each study was 22.0%. This is similar to the incidence in the present study (22.9%).

Remaining microscopic findings (neoplastic and nonneoplastic) were incidental background findings common to this strain and not test article-related.

# Associated Study Information

## References

McInnes, E., “Wistar and Spraque-Dawley Rats,” *Background Lesions in Laboratory Animals*, p. 17, Saunders Elsevier: Edinburgh, United Kingdom (2012a).

McInnes, E., “Wistar and Spraque-Dawley Rats,” *Background Lesions in Laboratory Animals*, p. 35, Saunders Elsevier: Edinburgh, United Kingdom (2012b).

## Abbreviations

The following lists of abbreviations are used by Covance. Some, but not necessarily all, of this information may be needed for this report.

| Abbreviation | | Definition |
| --- | --- | --- |
| Neoplastic Findings | | |
|  | B | Primary, benign neoplasm |
|  | C | Multicentric neoplasm |
|  | F | Infiltrating neoplasm |
|  | I | Locally invasive neoplasm |
|  | M | Primary, malignant neoplasm |
|  | N | Metastatic neoplasm |
|  | X | Other neoplasm |
| Grades for Severity or Amount | | |
|  | 1 | Minimal - describes an inconspicuous change |
|  | 2 | Slight - referring to a noticeable but not prominent feature |
|  | 3 | Moderate - a prominent feature |
|  | 4 | Marked - a dominant but not overwhelming feature |
|  | 5 | Severe - implies an overwhelming condition |
| Tissue Abbreviations | | |
|  | BALT | Bronchi-associated lymphoid tissue |
|  | GALT | Gut-associated lymphoid tissue |

## Comments on the Data

The following comments on the data are used by Covance. Some, but not necessarily all, of this information may be needed for this report.

Various models of calculators, computers, and computer programs were used to analyze data. Because different models round off or truncate numbers differently, values in some tables (e.g., means, standard deviations, or individual values) may differ slightly from those in other tables, from individually calculated data, or from statistical analysis data. Neither the integrity nor the interpretation of the data was affected by these differences.

# Summary Tables

Table 5.1: Incidence of Macroscopic Observations - Terminal Euthanasia (Dosing Phase)

Test Article (dosage) 1M 2M 3M 4M 1F 2F 3F 4F

‑‑‑‑‑‑‑‑‑‑‑‑‑‑‑‑‑‑‑‑‑‑‑‑‑‑‑ ‑‑‑‑‑‑‑‑ ‑‑ ‑‑ ‑‑ ‑‑ ‑‑ ‑‑ ‑‑ ‑‑

Benzonatate (PF‑00345410) mg/kg/day 0 10 30 90 0 5 15 50

‑‑‑‑‑‑‑‑‑‑‑‑‑‑‑‑‑‑‑‑‑‑‑‑‑‑‑‑‑‑‑‑‑‑‑‑‑‑‑‑‑‑‑‑‑‑‑‑‑‑‑‑‑‑‑‑‑‑‑‑‑‑‑‑‑‑‑‑‑‑‑‑‑‑‑‑‑‑‑‑‑‑‑‑‑‑‑‑‑‑‑‑‑‑‑‑‑‑‑‑‑‑‑‑‑‑‑‑

Tissue/ Group/Subgroup/Sex: 1/1/M 2/1/M 3/1/M 4/1/M 1/1/F 2/1/F 3/1/F 4/1/F

Observation Number of Animals:  33  24  31  28  25  23  24  30

‑‑‑‑‑‑‑‑‑‑‑‑‑‑‑‑‑‑‑‑‑‑‑‑‑‑‑‑‑‑‑‑‑‑‑‑‑‑‑‑‑‑‑‑‑‑‑‑‑‑‑‑‑‑‑‑‑‑‑‑‑‑‑‑‑‑‑‑‑‑‑‑‑‑‑‑‑‑‑‑‑‑‑‑‑‑‑‑‑‑‑‑‑‑‑‑‑‑‑‑‑‑‑‑‑‑‑‑

Unremarkable:   5   4   8   8   4   2   9   2

Adipose, Other Number Examined:   0   0   0   0   4   0   0   1

Unremarkable:   0   0   0   0   0   0   0   0

Mass   0   0   0   0   4   0   0   1

Adipose, White,

Kidney Fat Pad Number Examined: 0 0 1 0 0 0 0 0

Unremarkable: 0 0 0 0 0 0 0 0

Thickened   0   0   1   0   0   0   0   0

Adrenal Number Examined:  33  24  31  28  25  23  24  30

Unremarkable:  33  20  30  25  22  19  22  28

Discolored   0   0   0   1   2   3   2   1

Large   0   3   1   2   1   1   0   1

Raised area   0   1   0   0   0   0   0   0

Small   0   0   0   0   1   0   0   0

Bone, Other Number Examined:   0   0   1   1   0   0   0   0

Unremarkable:   0   0   0   0   0   0   0   0

Large   0   0   1   0   0   0   0   0

Raised area   0   0   0   1   0   0   0   0

‑‑‑‑‑‑‑‑‑‑‑‑‑‑‑‑‑‑‑‑‑‑‑‑‑‑‑‑‑‑‑‑‑‑‑‑‑‑‑‑‑‑‑‑‑‑‑‑‑‑‑‑‑‑‑‑‑‑‑‑‑‑‑‑‑‑‑‑‑‑‑‑‑‑‑‑‑‑‑‑‑‑‑‑‑‑‑‑‑‑‑‑‑‑‑‑‑‑‑‑‑‑‑‑‑‑‑

Table

Incidence of Macroscopic Observations

Terminal Euthanasia (Dosing Phase)

Test Article (dosage) 1M 2M 3M 4M 1F 2F 3F 4F

‑‑‑‑‑‑‑‑‑‑‑‑‑‑‑‑‑‑‑‑‑‑‑‑‑‑‑ ‑‑‑‑‑‑‑‑ ‑‑ ‑‑ ‑‑ ‑‑ ‑‑ ‑‑ ‑‑ ‑‑

Benzonatate (PF‑00345410) mg/kg/day 0 10 30 90 0 5 15 50

‑‑‑‑‑‑‑‑‑‑‑‑‑‑‑‑‑‑‑‑‑‑‑‑‑‑‑‑‑‑‑‑‑‑‑‑‑‑‑‑‑‑‑‑‑‑‑‑‑‑‑‑‑‑‑‑‑‑‑‑‑‑‑‑‑‑‑‑‑‑‑‑‑‑‑‑‑‑‑‑‑‑‑‑‑‑‑‑‑‑‑‑‑‑‑‑‑‑‑‑‑‑‑‑‑‑‑‑

Tissue/ Group/Subgroup/Sex: 1/1/M 2/1/M 3/1/M 4/1/M 1/1/F 2/1/F 3/1/F 4/1/F

Observation Number of Animals:  33  24  31  28  25  23  24  30

‑‑‑‑‑‑‑‑‑‑‑‑‑‑‑‑‑‑‑‑‑‑‑‑‑‑‑‑‑‑‑‑‑‑‑‑‑‑‑‑‑‑‑‑‑‑‑‑‑‑‑‑‑‑‑‑‑‑‑‑‑‑‑‑‑‑‑‑‑‑‑‑‑‑‑‑‑‑‑‑‑‑‑‑‑‑‑‑‑‑‑‑‑‑‑‑‑‑‑‑‑‑‑‑‑‑‑‑

Unremarkable:   5   4   8   8   4   2   9   2

Brain Number Examined:  33  24  31  28  25  23  24  30

Unremarkable:  29  22  31  25  21  15  20  24

Depressed area   4   2   0   3   4   8   4   6

Cecum Number Examined:  33  24  31  28  25  23  24  30

Unremarkable:  33  24  31  27  25  23  24  30

Mass   0   0   0   1   0   0   0   0

Cervix Number Examined:   0   0   0   0  25  23  24  30

Unremarkable:   0   0   0   0  25  20  24  28

Discolored   0   0   0   0   0   1   0   0

Firm   0   0   0   0   0   1   0   1

Large   0   0   0   0   0   3   0   2

Clitoral Gland Number Examined:   0   0   0   0  25  23  24  30

Unremarkable:   0   0   0   0  23  22  23  29

Large   0   0   0   0   0   0   1   1

Mass   0   0   0   0   1   0   0   0

Not identified   0   0   0   0   1   1   0   1

‑‑‑‑‑‑‑‑‑‑‑‑‑‑‑‑‑‑‑‑‑‑‑‑‑‑‑‑‑‑‑‑‑‑‑‑‑‑‑‑‑‑‑‑‑‑‑‑‑‑‑‑‑‑‑‑‑‑‑‑‑‑‑‑‑‑‑‑‑‑‑‑‑‑‑‑‑‑‑‑‑‑‑‑‑‑‑‑‑‑‑‑‑‑‑‑‑‑‑‑‑‑‑‑‑‑‑

Table

Incidence of Macroscopic Observations

Terminal Euthanasia (Dosing Phase)

Test Article (dosage) 1M 2M 3M 4M 1F 2F 3F 4F

‑‑‑‑‑‑‑‑‑‑‑‑‑‑‑‑‑‑‑‑‑‑‑‑‑‑‑ ‑‑‑‑‑‑‑‑ ‑‑ ‑‑ ‑‑ ‑‑ ‑‑ ‑‑ ‑‑ ‑‑

Benzonatate (PF‑00345410) mg/kg/day 0 10 30 90 0 5 15 50

‑‑‑‑‑‑‑‑‑‑‑‑‑‑‑‑‑‑‑‑‑‑‑‑‑‑‑‑‑‑‑‑‑‑‑‑‑‑‑‑‑‑‑‑‑‑‑‑‑‑‑‑‑‑‑‑‑‑‑‑‑‑‑‑‑‑‑‑‑‑‑‑‑‑‑‑‑‑‑‑‑‑‑‑‑‑‑‑‑‑‑‑‑‑‑‑‑‑‑‑‑‑‑‑‑‑‑‑

Tissue/ Group/Subgroup/Sex: 1/1/M 2/1/M 3/1/M 4/1/M 1/1/F 2/1/F 3/1/F 4/1/F

Observation Number of Animals:  33  24  31  28  25  23  24  30

‑‑‑‑‑‑‑‑‑‑‑‑‑‑‑‑‑‑‑‑‑‑‑‑‑‑‑‑‑‑‑‑‑‑‑‑‑‑‑‑‑‑‑‑‑‑‑‑‑‑‑‑‑‑‑‑‑‑‑‑‑‑‑‑‑‑‑‑‑‑‑‑‑‑‑‑‑‑‑‑‑‑‑‑‑‑‑‑‑‑‑‑‑‑‑‑‑‑‑‑‑‑‑‑‑‑‑‑

Unremarkable:   5   4   8   8   4   2   9   2

Epididymis Number Examined:  33  24  31  28   0   0   0   0

Unremarkable:  30  24  30  27   0   0   0   0

Cyst   0   0   0   1   0   0   0   0

Large   1   0   0   0   0   0   0   0

Small   2   0   1   0   0   0   0   0

Eye Number Examined:  33  24  31  28  25  23  24  30

Unremarkable:  33  24  30  27  25  23  24  30

Discolored   0   0   1   1   0   0   0   0

Protruding   0   0   1   1   0   0   0   0

Foot/Footpad Number Examined:   9   3   5   2   0   2   3   2

Unremarkable:   0   0   0   0   0   0   0   0

Discolored   1   0   0   0   0   0   0   0

Raised area   0   0   0   1   0   0   0   0

Scab   4   3   1   1   0   0   3   1

Scaly skin   3   1   1   1   0   1   0   1

Sore   3   0   5   0   0   1   0   0

Swollen   1   0   0   0   0   0   0   0

‑‑‑‑‑‑‑‑‑‑‑‑‑‑‑‑‑‑‑‑‑‑‑‑‑‑‑‑‑‑‑‑‑‑‑‑‑‑‑‑‑‑‑‑‑‑‑‑‑‑‑‑‑‑‑‑‑‑‑‑‑‑‑‑‑‑‑‑‑‑‑‑‑‑‑‑‑‑‑‑‑‑‑‑‑‑‑‑‑‑‑‑‑‑‑‑‑‑‑‑‑‑‑‑‑‑‑

Table

Incidence of Macroscopic Observations

Terminal Euthanasia (Dosing Phase)

Test Article (dosage) 1M 2M 3M 4M 1F 2F 3F 4F

‑‑‑‑‑‑‑‑‑‑‑‑‑‑‑‑‑‑‑‑‑‑‑‑‑‑‑ ‑‑‑‑‑‑‑‑ ‑‑ ‑‑ ‑‑ ‑‑ ‑‑ ‑‑ ‑‑ ‑‑

Benzonatate (PF‑00345410) mg/kg/day 0 10 30 90 0 5 15 50

‑‑‑‑‑‑‑‑‑‑‑‑‑‑‑‑‑‑‑‑‑‑‑‑‑‑‑‑‑‑‑‑‑‑‑‑‑‑‑‑‑‑‑‑‑‑‑‑‑‑‑‑‑‑‑‑‑‑‑‑‑‑‑‑‑‑‑‑‑‑‑‑‑‑‑‑‑‑‑‑‑‑‑‑‑‑‑‑‑‑‑‑‑‑‑‑‑‑‑‑‑‑‑‑‑‑‑‑

Tissue/ Group/Subgroup/Sex: 1/1/M 2/1/M 3/1/M 4/1/M 1/1/F 2/1/F 3/1/F 4/1/F

Observation Number of Animals:  33  24  31  28  25  23  24  30

‑‑‑‑‑‑‑‑‑‑‑‑‑‑‑‑‑‑‑‑‑‑‑‑‑‑‑‑‑‑‑‑‑‑‑‑‑‑‑‑‑‑‑‑‑‑‑‑‑‑‑‑‑‑‑‑‑‑‑‑‑‑‑‑‑‑‑‑‑‑‑‑‑‑‑‑‑‑‑‑‑‑‑‑‑‑‑‑‑‑‑‑‑‑‑‑‑‑‑‑‑‑‑‑‑‑‑‑

Unremarkable:   5   4   8   8   4   2   9   2

Harderian Gland Number Examined:  33  24  31  28  25  23  24  30

Unremarkable:  33  23  31  28  25  23  24  30

Discolored   0   1   0   0   0   0   0   0

Jejunum Number Examined:  33  24  31  28  25  23  24  30

Unremarkable:  33  24  31  27  25  23  24  30

Raised area   0   0   0   1   0   0   0   0

Kidney Number Examined:  33  24  31  28  25  23  24  30

Unremarkable:  32  23  31  28  25  22  24  30

Cyst   1   0   0   0   0   1   0   0

Large   0   1   0   0   0   0   0   0

Lacrimal Gland Number Examined:   2   0   1   5   0   0   0   0

Unremarkable:   0   0   0   0   0   0   0   0

Discolored   2   0   1   5   0   0   0   0

‑‑‑‑‑‑‑‑‑‑‑‑‑‑‑‑‑‑‑‑‑‑‑‑‑‑‑‑‑‑‑‑‑‑‑‑‑‑‑‑‑‑‑‑‑‑‑‑‑‑‑‑‑‑‑‑‑‑‑‑‑‑‑‑‑‑‑‑‑‑‑‑‑‑‑‑‑‑‑‑‑‑‑‑‑‑‑‑‑‑‑‑‑‑‑‑‑‑‑‑‑‑‑‑‑‑‑

Table

Incidence of Macroscopic Observations

Terminal Euthanasia (Dosing Phase)

Test Article (dosage) 1M 2M 3M 4M 1F 2F 3F 4F

‑‑‑‑‑‑‑‑‑‑‑‑‑‑‑‑‑‑‑‑‑‑‑‑‑‑‑ ‑‑‑‑‑‑‑‑ ‑‑ ‑‑ ‑‑ ‑‑ ‑‑ ‑‑ ‑‑ ‑‑

Benzonatate (PF‑00345410) mg/kg/day 0 10 30 90 0 5 15 50

‑‑‑‑‑‑‑‑‑‑‑‑‑‑‑‑‑‑‑‑‑‑‑‑‑‑‑‑‑‑‑‑‑‑‑‑‑‑‑‑‑‑‑‑‑‑‑‑‑‑‑‑‑‑‑‑‑‑‑‑‑‑‑‑‑‑‑‑‑‑‑‑‑‑‑‑‑‑‑‑‑‑‑‑‑‑‑‑‑‑‑‑‑‑‑‑‑‑‑‑‑‑‑‑‑‑‑‑

Tissue/ Group/Subgroup/Sex: 1/1/M 2/1/M 3/1/M 4/1/M 1/1/F 2/1/F 3/1/F 4/1/F

Observation Number of Animals:  33  24  31  28  25  23  24  30

‑‑‑‑‑‑‑‑‑‑‑‑‑‑‑‑‑‑‑‑‑‑‑‑‑‑‑‑‑‑‑‑‑‑‑‑‑‑‑‑‑‑‑‑‑‑‑‑‑‑‑‑‑‑‑‑‑‑‑‑‑‑‑‑‑‑‑‑‑‑‑‑‑‑‑‑‑‑‑‑‑‑‑‑‑‑‑‑‑‑‑‑‑‑‑‑‑‑‑‑‑‑‑‑‑‑‑‑

Unremarkable:   5   4   8   8   4   2   9   2

Liver Number Examined:  33  24  31  28  25  23  24  30

Unremarkable:  25  17  28  20  23  19  22  26

Cyst   0   0   1   0   0   0   1   0

Discolored   8   6   2   7   1   4   1   3

Mass   0   0   0   0   1   0   0   0

Raised area   0   1   0   1   0   0   0   0

Rough surface   0   0   0   0   0   0   0   1

Lung Number Examined:  33  24  31  28  25  23  24  30

Unremarkable:  31  24  31  27  25  21  23  29

Discolored   2   0   0   1   0   2   1   1

Lymph Node,

Inguinal Number Examined: 33 24 31 28 25 23 24 30

Unremarkable: 32 24 31 27 25 22 24 29

Large   0   0   0   1   0   0   0   0

Not identified   1   0   0   0   0   1   0   1

‑‑‑‑‑‑‑‑‑‑‑‑‑‑‑‑‑‑‑‑‑‑‑‑‑‑‑‑‑‑‑‑‑‑‑‑‑‑‑‑‑‑‑‑‑‑‑‑‑‑‑‑‑‑‑‑‑‑‑‑‑‑‑‑‑‑‑‑‑‑‑‑‑‑‑‑‑‑‑‑‑‑‑‑‑‑‑‑‑‑‑‑‑‑‑‑‑‑‑‑‑‑‑‑‑‑‑

Table

Incidence of Macroscopic Observations

Terminal Euthanasia (Dosing Phase)

Test Article (dosage) 1M 2M 3M 4M 1F 2F 3F 4F

‑‑‑‑‑‑‑‑‑‑‑‑‑‑‑‑‑‑‑‑‑‑‑‑‑‑‑ ‑‑‑‑‑‑‑‑ ‑‑ ‑‑ ‑‑ ‑‑ ‑‑ ‑‑ ‑‑ ‑‑

Benzonatate (PF‑00345410) mg/kg/day 0 10 30 90 0 5 15 50

‑‑‑‑‑‑‑‑‑‑‑‑‑‑‑‑‑‑‑‑‑‑‑‑‑‑‑‑‑‑‑‑‑‑‑‑‑‑‑‑‑‑‑‑‑‑‑‑‑‑‑‑‑‑‑‑‑‑‑‑‑‑‑‑‑‑‑‑‑‑‑‑‑‑‑‑‑‑‑‑‑‑‑‑‑‑‑‑‑‑‑‑‑‑‑‑‑‑‑‑‑‑‑‑‑‑‑‑

Tissue/ Group/Subgroup/Sex: 1/1/M 2/1/M 3/1/M 4/1/M 1/1/F 2/1/F 3/1/F 4/1/F

Observation Number of Animals:  33  24  31  28  25  23  24  30

‑‑‑‑‑‑‑‑‑‑‑‑‑‑‑‑‑‑‑‑‑‑‑‑‑‑‑‑‑‑‑‑‑‑‑‑‑‑‑‑‑‑‑‑‑‑‑‑‑‑‑‑‑‑‑‑‑‑‑‑‑‑‑‑‑‑‑‑‑‑‑‑‑‑‑‑‑‑‑‑‑‑‑‑‑‑‑‑‑‑‑‑‑‑‑‑‑‑‑‑‑‑‑‑‑‑‑‑

Unremarkable:   5   4   8   8   4   2   9   2

Lymph Node,

Mesenteric Number Examined: 33 24 31 28 25 23 24 30

Unremarkable: 30 24 30 28 25 22 21 29

Discolored   3   0   1   0   0   0   1   0

Large   1   0   0   0   0   1   2   1

Lymph Node, Other Number Examined:   1   2   3   1   1   1   1   2

Unremarkable:   0   0   0   0   0   0   0   0

Discolored   0   0   1   1   0   0   0   0

Large   1   2   3   0   1   1   1   2

Mammary Gland,

Female Number Examined: 0 0 0 0 25 23 24 30

Unremarkable: 0 0 0 0 19 16 21 20

Mass   0   0   0   0   6   7   3  10

Mesentery Number Examined:   0   0   0   0   1   0   0   1

Unremarkable:   0   0   0   0   0   0   0   0

Mass   0   0   0   0   1   0   0   1

‑‑‑‑‑‑‑‑‑‑‑‑‑‑‑‑‑‑‑‑‑‑‑‑‑‑‑‑‑‑‑‑‑‑‑‑‑‑‑‑‑‑‑‑‑‑‑‑‑‑‑‑‑‑‑‑‑‑‑‑‑‑‑‑‑‑‑‑‑‑‑‑‑‑‑‑‑‑‑‑‑‑‑‑‑‑‑‑‑‑‑‑‑‑‑‑‑‑‑‑‑‑‑‑‑‑‑

Table

Incidence of Macroscopic Observations

Terminal Euthanasia (Dosing Phase)

Test Article (dosage) 1M 2M 3M 4M 1F 2F 3F 4F

‑‑‑‑‑‑‑‑‑‑‑‑‑‑‑‑‑‑‑‑‑‑‑‑‑‑‑ ‑‑‑‑‑‑‑‑ ‑‑ ‑‑ ‑‑ ‑‑ ‑‑ ‑‑ ‑‑ ‑‑

Benzonatate (PF‑00345410) mg/kg/day 0 10 30 90 0 5 15 50

‑‑‑‑‑‑‑‑‑‑‑‑‑‑‑‑‑‑‑‑‑‑‑‑‑‑‑‑‑‑‑‑‑‑‑‑‑‑‑‑‑‑‑‑‑‑‑‑‑‑‑‑‑‑‑‑‑‑‑‑‑‑‑‑‑‑‑‑‑‑‑‑‑‑‑‑‑‑‑‑‑‑‑‑‑‑‑‑‑‑‑‑‑‑‑‑‑‑‑‑‑‑‑‑‑‑‑‑

Tissue/ Group/Subgroup/Sex: 1/1/M 2/1/M 3/1/M 4/1/M 1/1/F 2/1/F 3/1/F 4/1/F

Observation Number of Animals:  33  24  31  28  25  23  24  30

‑‑‑‑‑‑‑‑‑‑‑‑‑‑‑‑‑‑‑‑‑‑‑‑‑‑‑‑‑‑‑‑‑‑‑‑‑‑‑‑‑‑‑‑‑‑‑‑‑‑‑‑‑‑‑‑‑‑‑‑‑‑‑‑‑‑‑‑‑‑‑‑‑‑‑‑‑‑‑‑‑‑‑‑‑‑‑‑‑‑‑‑‑‑‑‑‑‑‑‑‑‑‑‑‑‑‑‑

Unremarkable:   5   4   8   8   4   2   9   2

Nerve, Optic Number Examined:  33  24  31  28  25  23  24  30

Unremarkable:  32  24  31  28  25  23  24  30

Small   1   0   0   0   0   0   0   0

Ovary Number Examined:   0   0   0   0  25  23  24  30

Unremarkable:   0   0   0   0  24  19  21  25

Cyst   0   0   0   0   1   3   2   5

Discolored   0   0   0   0   0   1   0   0

Mass   0   0   0   0   0   0   1   0

Pancreas Number Examined:  33  24  31  28  25  23  24  30

Unremarkable:  33  24  31  28  25  23  23  30

Mass   0   0   0   0   0   0   1   0

Pituitary Number Examined:  33  24  31  28  25  23  24  30

Unremarkable:  28  22  31  26  12  10  13  15

Discolored   0   0   0   0   3   1   4   3

Large   0   0   0   0   0   2   0   0

Mass   5   2   0   2   9  10   7  12

Raised area   0   0   0   0   1   0   0   0

‑‑‑‑‑‑‑‑‑‑‑‑‑‑‑‑‑‑‑‑‑‑‑‑‑‑‑‑‑‑‑‑‑‑‑‑‑‑‑‑‑‑‑‑‑‑‑‑‑‑‑‑‑‑‑‑‑‑‑‑‑‑‑‑‑‑‑‑‑‑‑‑‑‑‑‑‑‑‑‑‑‑‑‑‑‑‑‑‑‑‑‑‑‑‑‑‑‑‑‑‑‑‑‑‑‑‑

Table

Incidence of Macroscopic Observations

Terminal Euthanasia (Dosing Phase)

Test Article (dosage) 1M 2M 3M 4M 1F 2F 3F 4F

‑‑‑‑‑‑‑‑‑‑‑‑‑‑‑‑‑‑‑‑‑‑‑‑‑‑‑ ‑‑‑‑‑‑‑‑ ‑‑ ‑‑ ‑‑ ‑‑ ‑‑ ‑‑ ‑‑ ‑‑

Benzonatate (PF‑00345410) mg/kg/day 0 10 30 90 0 5 15 50

‑‑‑‑‑‑‑‑‑‑‑‑‑‑‑‑‑‑‑‑‑‑‑‑‑‑‑‑‑‑‑‑‑‑‑‑‑‑‑‑‑‑‑‑‑‑‑‑‑‑‑‑‑‑‑‑‑‑‑‑‑‑‑‑‑‑‑‑‑‑‑‑‑‑‑‑‑‑‑‑‑‑‑‑‑‑‑‑‑‑‑‑‑‑‑‑‑‑‑‑‑‑‑‑‑‑‑‑

Tissue/ Group/Subgroup/Sex: 1/1/M 2/1/M 3/1/M 4/1/M 1/1/F 2/1/F 3/1/F 4/1/F

Observation Number of Animals:  33  24  31  28  25  23  24  30

‑‑‑‑‑‑‑‑‑‑‑‑‑‑‑‑‑‑‑‑‑‑‑‑‑‑‑‑‑‑‑‑‑‑‑‑‑‑‑‑‑‑‑‑‑‑‑‑‑‑‑‑‑‑‑‑‑‑‑‑‑‑‑‑‑‑‑‑‑‑‑‑‑‑‑‑‑‑‑‑‑‑‑‑‑‑‑‑‑‑‑‑‑‑‑‑‑‑‑‑‑‑‑‑‑‑‑‑

Unremarkable:   5   4   8   8   4   2   9   2

Preputial Gland Number Examined:  33  24  31  28   0   0   0   0

Unremarkable:  32  23  31  28   0   0   0   0

Discolored   0   1   0   0   0   0   0   0

Not present   1   0   0   0   0   0   0   0

Prostate Number Examined:  33  24  31  28   0   0   0   0

Unremarkable:  33  24  29  28   0   0   0   0

Discolored   0   0   1   0   0   0   0   0

Mass   0   0   1   0   0   0   0   0

Seminal Vesicle Number Examined:  33  24  31  28   0   0   0   0

Unremarkable:  31  24  30  28   0   0   0   0

Large   0   0   1   0   0   0   0   0

Small   2   0   0   0   0   0   0   0

‑‑‑‑‑‑‑‑‑‑‑‑‑‑‑‑‑‑‑‑‑‑‑‑‑‑‑‑‑‑‑‑‑‑‑‑‑‑‑‑‑‑‑‑‑‑‑‑‑‑‑‑‑‑‑‑‑‑‑‑‑‑‑‑‑‑‑‑‑‑‑‑‑‑‑‑‑‑‑‑‑‑‑‑‑‑‑‑‑‑‑‑‑‑‑‑‑‑‑‑‑‑‑‑‑‑‑

Table

Incidence of Macroscopic Observations

Terminal Euthanasia (Dosing Phase)

Test Article (dosage) 1M 2M 3M 4M 1F 2F 3F 4F

‑‑‑‑‑‑‑‑‑‑‑‑‑‑‑‑‑‑‑‑‑‑‑‑‑‑‑ ‑‑‑‑‑‑‑‑ ‑‑ ‑‑ ‑‑ ‑‑ ‑‑ ‑‑ ‑‑ ‑‑

Benzonatate (PF‑00345410) mg/kg/day 0 10 30 90 0 5 15 50

‑‑‑‑‑‑‑‑‑‑‑‑‑‑‑‑‑‑‑‑‑‑‑‑‑‑‑‑‑‑‑‑‑‑‑‑‑‑‑‑‑‑‑‑‑‑‑‑‑‑‑‑‑‑‑‑‑‑‑‑‑‑‑‑‑‑‑‑‑‑‑‑‑‑‑‑‑‑‑‑‑‑‑‑‑‑‑‑‑‑‑‑‑‑‑‑‑‑‑‑‑‑‑‑‑‑‑‑

Tissue/ Group/Subgroup/Sex: 1/1/M 2/1/M 3/1/M 4/1/M 1/1/F 2/1/F 3/1/F 4/1/F

Observation Number of Animals:  33  24  31  28  25  23  24  30

‑‑‑‑‑‑‑‑‑‑‑‑‑‑‑‑‑‑‑‑‑‑‑‑‑‑‑‑‑‑‑‑‑‑‑‑‑‑‑‑‑‑‑‑‑‑‑‑‑‑‑‑‑‑‑‑‑‑‑‑‑‑‑‑‑‑‑‑‑‑‑‑‑‑‑‑‑‑‑‑‑‑‑‑‑‑‑‑‑‑‑‑‑‑‑‑‑‑‑‑‑‑‑‑‑‑‑‑

Unremarkable:   5   4   8   8   4   2   9   2

Skin/Subcutis Number Examined:  33  24  31  28  25  23  24  30

Unremarkable:  22  19  28  21  23  22  20  24

Alopecia   2   1   0   0   0   0   0   0

Discolored   1   0   0   1   0   0   0   0

Mass   7   3   2   4   1   0   2   1

Raised area   0   0   1   0   0   0   0   0

Scab   2   1   0   3   0   1   2   5

Sore   1   0   0   0   1   0   1   0

Spleen Number Examined:  33  24  31  28  25  23  24  30

Unremarkable:  33  21  31  28  24  22  22  29

Cyst   0   0   0   0   0   1   0   0

Discolored   0   2   0   0   0   0   0   0

Large   0   1   0   0   1   0   2   1

Stomach Number Examined:  33  24  31  28  25  23  24  30

Unremarkable:  29  20  23  24  23  23  22  30

Discolored   3   3   8   4   2   0   2   0

Mass   0   1   0   0   0   0   0   0

Raised area   1   0   0   0   0   0   0   0

‑‑‑‑‑‑‑‑‑‑‑‑‑‑‑‑‑‑‑‑‑‑‑‑‑‑‑‑‑‑‑‑‑‑‑‑‑‑‑‑‑‑‑‑‑‑‑‑‑‑‑‑‑‑‑‑‑‑‑‑‑‑‑‑‑‑‑‑‑‑‑‑‑‑‑‑‑‑‑‑‑‑‑‑‑‑‑‑‑‑‑‑‑‑‑‑‑‑‑‑‑‑‑‑‑‑‑

Table

Incidence of Macroscopic Observations

Terminal Euthanasia (Dosing Phase)

Test Article (dosage) 1M 2M 3M 4M 1F 2F 3F 4F

‑‑‑‑‑‑‑‑‑‑‑‑‑‑‑‑‑‑‑‑‑‑‑‑‑‑‑ ‑‑‑‑‑‑‑‑ ‑‑ ‑‑ ‑‑ ‑‑ ‑‑ ‑‑ ‑‑ ‑‑

Benzonatate (PF‑00345410) mg/kg/day 0 10 30 90 0 5 15 50

‑‑‑‑‑‑‑‑‑‑‑‑‑‑‑‑‑‑‑‑‑‑‑‑‑‑‑‑‑‑‑‑‑‑‑‑‑‑‑‑‑‑‑‑‑‑‑‑‑‑‑‑‑‑‑‑‑‑‑‑‑‑‑‑‑‑‑‑‑‑‑‑‑‑‑‑‑‑‑‑‑‑‑‑‑‑‑‑‑‑‑‑‑‑‑‑‑‑‑‑‑‑‑‑‑‑‑‑

Tissue/ Group/Subgroup/Sex: 1/1/M 2/1/M 3/1/M 4/1/M 1/1/F 2/1/F 3/1/F 4/1/F

Observation Number of Animals:  33  24  31  28  25  23  24  30

‑‑‑‑‑‑‑‑‑‑‑‑‑‑‑‑‑‑‑‑‑‑‑‑‑‑‑‑‑‑‑‑‑‑‑‑‑‑‑‑‑‑‑‑‑‑‑‑‑‑‑‑‑‑‑‑‑‑‑‑‑‑‑‑‑‑‑‑‑‑‑‑‑‑‑‑‑‑‑‑‑‑‑‑‑‑‑‑‑‑‑‑‑‑‑‑‑‑‑‑‑‑‑‑‑‑‑‑

Unremarkable:   5   4   8   8   4   2   9   2

Testis Number Examined:  33  24  31  28   0   0   0   0

Unremarkable:  26  20  30  24   0   0   0   0

Cyst   0   0   0   1   0   0   0   0

Discolored   3   2   0   0   0   0   0   0

Large   1   1   0   1   0   0   0   0

Small   4   1   1   1   0   0   0   0

Soft   3   1   1   2   0   0   0   0

Thymus Number Examined:  33  24  31  28  25  23  24  30

Unremarkable:  30  21  25  25  19  17  22  21

Cyst   0   0   0   0   2   0   0   0

Mass   0   0   0   1   2   3   1   2

Not identified   3   3   6   2   2   3   1   7

Thyroid Number Examined:  33  24  31  28  25  23  24  30

Unremarkable:  28  22  26  26  24  23  23  30

Cyst   3   0   0   0   0   0   0   0

Discolored   0   0   0   0   1   0   0   0

Large   2   2   5   2   0   0   1   0

‑‑‑‑‑‑‑‑‑‑‑‑‑‑‑‑‑‑‑‑‑‑‑‑‑‑‑‑‑‑‑‑‑‑‑‑‑‑‑‑‑‑‑‑‑‑‑‑‑‑‑‑‑‑‑‑‑‑‑‑‑‑‑‑‑‑‑‑‑‑‑‑‑‑‑‑‑‑‑‑‑‑‑‑‑‑‑‑‑‑‑‑‑‑‑‑‑‑‑‑‑‑‑‑‑‑‑

Table

Incidence of Macroscopic Observations

Terminal Euthanasia (Dosing Phase)

Test Article (dosage) 1M 2M 3M 4M 1F 2F 3F 4F

‑‑‑‑‑‑‑‑‑‑‑‑‑‑‑‑‑‑‑‑‑‑‑‑‑‑‑ ‑‑‑‑‑‑‑‑ ‑‑ ‑‑ ‑‑ ‑‑ ‑‑ ‑‑ ‑‑ ‑‑

Benzonatate (PF‑00345410) mg/kg/day 0 10 30 90 0 5 15 50

‑‑‑‑‑‑‑‑‑‑‑‑‑‑‑‑‑‑‑‑‑‑‑‑‑‑‑‑‑‑‑‑‑‑‑‑‑‑‑‑‑‑‑‑‑‑‑‑‑‑‑‑‑‑‑‑‑‑‑‑‑‑‑‑‑‑‑‑‑‑‑‑‑‑‑‑‑‑‑‑‑‑‑‑‑‑‑‑‑‑‑‑‑‑‑‑‑‑‑‑‑‑‑‑‑‑‑‑

Tissue/ Group/Subgroup/Sex: 1/1/M 2/1/M 3/1/M 4/1/M 1/1/F 2/1/F 3/1/F 4/1/F

Observation Number of Animals:  33  24  31  28  25  23  24  30

‑‑‑‑‑‑‑‑‑‑‑‑‑‑‑‑‑‑‑‑‑‑‑‑‑‑‑‑‑‑‑‑‑‑‑‑‑‑‑‑‑‑‑‑‑‑‑‑‑‑‑‑‑‑‑‑‑‑‑‑‑‑‑‑‑‑‑‑‑‑‑‑‑‑‑‑‑‑‑‑‑‑‑‑‑‑‑‑‑‑‑‑‑‑‑‑‑‑‑‑‑‑‑‑‑‑‑‑

Unremarkable:   5   4   8   8   4   2   9   2

Ureter Number Examined:  33  24  31  28  25  23  24  30

Unremarkable:  33  24  31  28  25  23  23  29

Not identified   0   0   0   0   0   0   0   1

Raised area   0   0   0   0   0   0   1   0

Urinary Bladder Number Examined:  33  24  31  28  25  23  24  30

Unremarkable:  33  24  30  28  25  23  24  30

Large   0   0   1   0   0   0   0   0

Uterus Number Examined:   0   0   0   0  25  23  24  30

Unremarkable:   0   0   0   0  22  18  23  29

Cyst   0   0   0   0   1   3   1   1

Discolored   0   0   0   0   0   1   0   0

Intussusception   0   0   0   0   0   1   0   0

Mass   0   0   0   0   2   0   0   0

‑‑‑‑‑‑‑‑‑‑‑‑‑‑‑‑‑‑‑‑‑‑‑‑‑‑‑‑‑‑‑‑‑‑‑‑‑‑‑‑‑‑‑‑‑‑‑‑‑‑‑‑‑‑‑‑‑‑‑‑‑‑‑‑‑‑‑‑‑‑‑‑‑‑‑‑‑‑‑‑‑‑‑‑‑‑‑‑‑‑‑‑‑‑‑‑‑‑‑‑‑‑‑‑‑‑‑

Table 5.2: Incidence of Macroscopic Observations - Unscheduled Euthanasias and Deaths

Test Article (dosage) 1M 2M 3M 4M 1F 2F 3F 4F

‑‑‑‑‑‑‑‑‑‑‑‑‑‑‑‑‑‑‑‑‑‑‑‑‑‑‑ ‑‑‑‑‑‑‑‑ ‑‑ ‑‑ ‑‑ ‑‑ ‑‑ ‑‑ ‑‑ ‑‑

Benzonatate (PF‑00345410) mg/kg/day 0 10 30 90 0 5 15 50

‑‑‑‑‑‑‑‑‑‑‑‑‑‑‑‑‑‑‑‑‑‑‑‑‑‑‑‑‑‑‑‑‑‑‑‑‑‑‑‑‑‑‑‑‑‑‑‑‑‑‑‑‑‑‑‑‑‑‑‑‑‑‑‑‑‑‑‑‑‑‑‑‑‑‑‑‑‑‑‑‑‑‑‑‑‑‑‑‑‑‑‑‑‑‑‑‑‑‑‑‑‑‑‑‑‑‑‑

Tissue/ Group/Subgroup/Sex: 1/1/M 2/1/M 3/1/M 4/1/M 1/1/F 2/1/F 3/1/F 4/1/F

Observation Number of Animals:  22  26  19  27  30  27  26  25

‑‑‑‑‑‑‑‑‑‑‑‑‑‑‑‑‑‑‑‑‑‑‑‑‑‑‑‑‑‑‑‑‑‑‑‑‑‑‑‑‑‑‑‑‑‑‑‑‑‑‑‑‑‑‑‑‑‑‑‑‑‑‑‑‑‑‑‑‑‑‑‑‑‑‑‑‑‑‑‑‑‑‑‑‑‑‑‑‑‑‑‑‑‑‑‑‑‑‑‑‑‑‑‑‑‑‑‑

Unremarkable:   0   2   0   4   0   1   0   2

Abdominal Cavity Number Examined:   0   1   0   1   1   1   1   0

Unremarkable:   0   0   0   0   0   0   0   0

Abnormal contents   0   1   0   1   0   0   0   0

Mass   0   0   0   0   1   1   1   0

Adipose, Other Number Examined:   0   0   0   0   1   0   0   3

Unremarkable:   0   0   0   0   0   0   0   0

Mass   0   0   0   0   0   0   0   1

Thickened   0   0   0   0   1   0   0   2

Adrenal Number Examined:  22  26  19  27  30  27  26  25

Unremarkable:  22  24  16  26  26  22  23  22

Cyst   0   0   0   0   0   1   0   0

Discolored   0   1   2   1   3   1   1   3

Large   0   1   1   0   1   4   1   0

Mass   0   0   0   0   0   0   1   0

Bone, Other Number Examined:   2   0   0   0   0   0   0   0

Unremarkable:   1   0   0   0   0   0   0   0

Large   1   0   0   0   0   0   0   0

‑‑‑‑‑‑‑‑‑‑‑‑‑‑‑‑‑‑‑‑‑‑‑‑‑‑‑‑‑‑‑‑‑‑‑‑‑‑‑‑‑‑‑‑‑‑‑‑‑‑‑‑‑‑‑‑‑‑‑‑‑‑‑‑‑‑‑‑‑‑‑‑‑‑‑‑‑‑‑‑‑‑‑‑‑‑‑‑‑‑‑‑‑‑‑‑‑‑‑‑‑‑‑‑‑‑‑

Table

Incidence of Macroscopic Observations

Unscheduled Euthanasias and Deaths

Test Article (dosage) 1M 2M 3M 4M 1F 2F 3F 4F

‑‑‑‑‑‑‑‑‑‑‑‑‑‑‑‑‑‑‑‑‑‑‑‑‑‑‑ ‑‑‑‑‑‑‑‑ ‑‑ ‑‑ ‑‑ ‑‑ ‑‑ ‑‑ ‑‑ ‑‑

Benzonatate (PF‑00345410) mg/kg/day 0 10 30 90 0 5 15 50

‑‑‑‑‑‑‑‑‑‑‑‑‑‑‑‑‑‑‑‑‑‑‑‑‑‑‑‑‑‑‑‑‑‑‑‑‑‑‑‑‑‑‑‑‑‑‑‑‑‑‑‑‑‑‑‑‑‑‑‑‑‑‑‑‑‑‑‑‑‑‑‑‑‑‑‑‑‑‑‑‑‑‑‑‑‑‑‑‑‑‑‑‑‑‑‑‑‑‑‑‑‑‑‑‑‑‑‑

Tissue/ Group/Subgroup/Sex: 1/1/M 2/1/M 3/1/M 4/1/M 1/1/F 2/1/F 3/1/F 4/1/F

Observation Number of Animals:  22  26  19  27  30  27  26  25

‑‑‑‑‑‑‑‑‑‑‑‑‑‑‑‑‑‑‑‑‑‑‑‑‑‑‑‑‑‑‑‑‑‑‑‑‑‑‑‑‑‑‑‑‑‑‑‑‑‑‑‑‑‑‑‑‑‑‑‑‑‑‑‑‑‑‑‑‑‑‑‑‑‑‑‑‑‑‑‑‑‑‑‑‑‑‑‑‑‑‑‑‑‑‑‑‑‑‑‑‑‑‑‑‑‑‑‑

Unremarkable:   0   2   0   4   0   1   0   2

Brain Number Examined:  22  26  19  27  30  27  26  25

Unremarkable:  13  17  12  17  12  11  12  11

Depressed area   8   9   7   8  18  16  14  14

Discolored   0   0   0   1   0   0   0   0

Large   1   0   0   0   0   0   0   0

Soft   1   0   0   1   0   0   0   0

Cecum Number Examined:  22  26  19  27  30  27  26  25

Unremarkable:  22  25  18  27  30  27  26  25

Abnormal contents   0   1   1   0   0   0   0   0

Cervix Number Examined:   0   0   0   0  30  27  26  25

Unremarkable:   0   0   0   0  28  27  21  23

Large   0   0   0   0   1   0   0   1

Mass   0   0   0   0   1   0   5   1

Clitoral Gland Number Examined:   0   0   0   0  30  27  26  25

Unremarkable:   0   0   0   0  29  25  26  21

Discolored   0   0   0   0   1   1   0   0

Large   0   0   0   0   0   2   0   1

Not identified   0   0   0   0   0   0   0   3

‑‑‑‑‑‑‑‑‑‑‑‑‑‑‑‑‑‑‑‑‑‑‑‑‑‑‑‑‑‑‑‑‑‑‑‑‑‑‑‑‑‑‑‑‑‑‑‑‑‑‑‑‑‑‑‑‑‑‑‑‑‑‑‑‑‑‑‑‑‑‑‑‑‑‑‑‑‑‑‑‑‑‑‑‑‑‑‑‑‑‑‑‑‑‑‑‑‑‑‑‑‑‑‑‑‑‑

Table

Incidence of Macroscopic Observations

Unscheduled Euthanasias and Deaths

Test Article (dosage) 1M 2M 3M 4M 1F 2F 3F 4F

‑‑‑‑‑‑‑‑‑‑‑‑‑‑‑‑‑‑‑‑‑‑‑‑‑‑‑ ‑‑‑‑‑‑‑‑ ‑‑ ‑‑ ‑‑ ‑‑ ‑‑ ‑‑ ‑‑ ‑‑

Benzonatate (PF‑00345410) mg/kg/day 0 10 30 90 0 5 15 50

‑‑‑‑‑‑‑‑‑‑‑‑‑‑‑‑‑‑‑‑‑‑‑‑‑‑‑‑‑‑‑‑‑‑‑‑‑‑‑‑‑‑‑‑‑‑‑‑‑‑‑‑‑‑‑‑‑‑‑‑‑‑‑‑‑‑‑‑‑‑‑‑‑‑‑‑‑‑‑‑‑‑‑‑‑‑‑‑‑‑‑‑‑‑‑‑‑‑‑‑‑‑‑‑‑‑‑‑

Tissue/ Group/Subgroup/Sex: 1/1/M 2/1/M 3/1/M 4/1/M 1/1/F 2/1/F 3/1/F 4/1/F

Observation Number of Animals:  22  26  19  27  30  27  26  25

‑‑‑‑‑‑‑‑‑‑‑‑‑‑‑‑‑‑‑‑‑‑‑‑‑‑‑‑‑‑‑‑‑‑‑‑‑‑‑‑‑‑‑‑‑‑‑‑‑‑‑‑‑‑‑‑‑‑‑‑‑‑‑‑‑‑‑‑‑‑‑‑‑‑‑‑‑‑‑‑‑‑‑‑‑‑‑‑‑‑‑‑‑‑‑‑‑‑‑‑‑‑‑‑‑‑‑‑

Unremarkable:   0   2   0   4   0   1   0   2

Colon Number Examined:  22  26  19  27  30  27  26  25

Unremarkable:  22  25  18  27  30  27  26  25

Abnormal contents   0   1   1   0   0   0   0   0

Duodenum Number Examined:  22  26  19  27  30  27  26  25

Unremarkable:  22  25  19  27  30  27  26  25

Abnormal contents   0   1   0   0   0   0   0   0

Epididymis Number Examined:  22  26  19  27   0   0   0   0

Unremarkable:  21  25  19  27   0   0   0   0

Large   0   1   0   0   0   0   0   0

Small   1   0   0   0   0   0   0   0

Esophagus Number Examined:  22  26  19  27  30  27  26  25

Unremarkable:  22  26  19  27  29  27  26  25

Perforation   0   0   0   0   1   0   0   0

Eye Number Examined:  22  26  19  27  30  27  26  25

Unremarkable:  22  26  19  27  30  27  25  25

Raised area   0   0   0   0   0   0   1   0

‑‑‑‑‑‑‑‑‑‑‑‑‑‑‑‑‑‑‑‑‑‑‑‑‑‑‑‑‑‑‑‑‑‑‑‑‑‑‑‑‑‑‑‑‑‑‑‑‑‑‑‑‑‑‑‑‑‑‑‑‑‑‑‑‑‑‑‑‑‑‑‑‑‑‑‑‑‑‑‑‑‑‑‑‑‑‑‑‑‑‑‑‑‑‑‑‑‑‑‑‑‑‑‑‑‑‑

Table

Incidence of Macroscopic Observations

Unscheduled Euthanasias and Deaths

Test Article (dosage) 1M 2M 3M 4M 1F 2F 3F 4F

‑‑‑‑‑‑‑‑‑‑‑‑‑‑‑‑‑‑‑‑‑‑‑‑‑‑‑ ‑‑‑‑‑‑‑‑ ‑‑ ‑‑ ‑‑ ‑‑ ‑‑ ‑‑ ‑‑ ‑‑

Benzonatate (PF‑00345410) mg/kg/day 0 10 30 90 0 5 15 50

‑‑‑‑‑‑‑‑‑‑‑‑‑‑‑‑‑‑‑‑‑‑‑‑‑‑‑‑‑‑‑‑‑‑‑‑‑‑‑‑‑‑‑‑‑‑‑‑‑‑‑‑‑‑‑‑‑‑‑‑‑‑‑‑‑‑‑‑‑‑‑‑‑‑‑‑‑‑‑‑‑‑‑‑‑‑‑‑‑‑‑‑‑‑‑‑‑‑‑‑‑‑‑‑‑‑‑‑

Tissue/ Group/Subgroup/Sex: 1/1/M 2/1/M 3/1/M 4/1/M 1/1/F 2/1/F 3/1/F 4/1/F

Observation Number of Animals:  22  26  19  27  30  27  26  25

‑‑‑‑‑‑‑‑‑‑‑‑‑‑‑‑‑‑‑‑‑‑‑‑‑‑‑‑‑‑‑‑‑‑‑‑‑‑‑‑‑‑‑‑‑‑‑‑‑‑‑‑‑‑‑‑‑‑‑‑‑‑‑‑‑‑‑‑‑‑‑‑‑‑‑‑‑‑‑‑‑‑‑‑‑‑‑‑‑‑‑‑‑‑‑‑‑‑‑‑‑‑‑‑‑‑‑‑

Unremarkable:   0   2   0   4   0   1   0   2

Foot/Footpad Number Examined:   3   1   6   5   1   1   0   4

Unremarkable:   0   0   0   0   0   0   0   0

Discolored   0   0   0   0   0   0   0   1

Scab   1   1   0   2   0   0   0   2

Sore   2   0   6   3   1   1   0   1

Swollen   1   0   3   1   0   0   0   0

Harderian Gland Number Examined:  22  26  19  27  30  27  26  25

Unremarkable:  22  25  19  27  30  26  26  24

Discolored   0   1   0   0   0   1   0   1

Heart Number Examined:  22  26  19  27  30  27  26  25

Unremarkable:  22  24  19  27  30  27  26  25

Discolored   0   1   0   0   0   0   0   0

Thickened   0   1   0   0   0   0   0   0

Ileum Number Examined:  22  26  19  27  30  27  26  25

Unremarkable:  22  25  18  27  30  27  26  25

Abnormal contents   0   1   1   0   0   0   0   0

‑‑‑‑‑‑‑‑‑‑‑‑‑‑‑‑‑‑‑‑‑‑‑‑‑‑‑‑‑‑‑‑‑‑‑‑‑‑‑‑‑‑‑‑‑‑‑‑‑‑‑‑‑‑‑‑‑‑‑‑‑‑‑‑‑‑‑‑‑‑‑‑‑‑‑‑‑‑‑‑‑‑‑‑‑‑‑‑‑‑‑‑‑‑‑‑‑‑‑‑‑‑‑‑‑‑‑

Table

Incidence of Macroscopic Observations

Unscheduled Euthanasias and Deaths

Test Article (dosage) 1M 2M 3M 4M 1F 2F 3F 4F

‑‑‑‑‑‑‑‑‑‑‑‑‑‑‑‑‑‑‑‑‑‑‑‑‑‑‑ ‑‑‑‑‑‑‑‑ ‑‑ ‑‑ ‑‑ ‑‑ ‑‑ ‑‑ ‑‑ ‑‑

Benzonatate (PF‑00345410) mg/kg/day 0 10 30 90 0 5 15 50

‑‑‑‑‑‑‑‑‑‑‑‑‑‑‑‑‑‑‑‑‑‑‑‑‑‑‑‑‑‑‑‑‑‑‑‑‑‑‑‑‑‑‑‑‑‑‑‑‑‑‑‑‑‑‑‑‑‑‑‑‑‑‑‑‑‑‑‑‑‑‑‑‑‑‑‑‑‑‑‑‑‑‑‑‑‑‑‑‑‑‑‑‑‑‑‑‑‑‑‑‑‑‑‑‑‑‑‑

Tissue/ Group/Subgroup/Sex: 1/1/M 2/1/M 3/1/M 4/1/M 1/1/F 2/1/F 3/1/F 4/1/F

Observation Number of Animals:  22  26  19  27  30  27  26  25

‑‑‑‑‑‑‑‑‑‑‑‑‑‑‑‑‑‑‑‑‑‑‑‑‑‑‑‑‑‑‑‑‑‑‑‑‑‑‑‑‑‑‑‑‑‑‑‑‑‑‑‑‑‑‑‑‑‑‑‑‑‑‑‑‑‑‑‑‑‑‑‑‑‑‑‑‑‑‑‑‑‑‑‑‑‑‑‑‑‑‑‑‑‑‑‑‑‑‑‑‑‑‑‑‑‑‑‑

Unremarkable:   0   2   0   4   0   1   0   2

Jejunum Number Examined:  22  26  19  27  30  27  26  25

Unremarkable:  22  24  18  27  30  27  26  25

Abnormal contents   0   1   1   0   0   0   0   0

Large   0   1   0   0   0   0   0   0

Mass   0   0   1   0   0   0   0   0

Thickened wall   0   1   0   0   0   0   0   0

Joint, Other Number Examined:   1   1   0   0   0   0   0   0

Unremarkable:   0   0   0   0   0   0   0   0

Large   1   1   0   0   0   0   0   0

Kidney Number Examined:  22  26  19  27  30  27  26  25

Unremarkable:  21  23  18  25  29  25  23  24

Calculus   0   0   0   0   0   0   1   0

Discolored   0   0   0   0   0   2   0   1

Large   1   1   1   2   1   1   2   0

Mass   0   1   0   0   0   0   1   0

Raised area   0   1   0   0   0   0   0   0

‑‑‑‑‑‑‑‑‑‑‑‑‑‑‑‑‑‑‑‑‑‑‑‑‑‑‑‑‑‑‑‑‑‑‑‑‑‑‑‑‑‑‑‑‑‑‑‑‑‑‑‑‑‑‑‑‑‑‑‑‑‑‑‑‑‑‑‑‑‑‑‑‑‑‑‑‑‑‑‑‑‑‑‑‑‑‑‑‑‑‑‑‑‑‑‑‑‑‑‑‑‑‑‑‑‑‑

Table

Incidence of Macroscopic Observations

Unscheduled Euthanasias and Deaths

Test Article (dosage) 1M 2M 3M 4M 1F 2F 3F 4F

‑‑‑‑‑‑‑‑‑‑‑‑‑‑‑‑‑‑‑‑‑‑‑‑‑‑‑ ‑‑‑‑‑‑‑‑ ‑‑ ‑‑ ‑‑ ‑‑ ‑‑ ‑‑ ‑‑ ‑‑

Benzonatate (PF‑00345410) mg/kg/day 0 10 30 90 0 5 15 50

‑‑‑‑‑‑‑‑‑‑‑‑‑‑‑‑‑‑‑‑‑‑‑‑‑‑‑‑‑‑‑‑‑‑‑‑‑‑‑‑‑‑‑‑‑‑‑‑‑‑‑‑‑‑‑‑‑‑‑‑‑‑‑‑‑‑‑‑‑‑‑‑‑‑‑‑‑‑‑‑‑‑‑‑‑‑‑‑‑‑‑‑‑‑‑‑‑‑‑‑‑‑‑‑‑‑‑‑

Tissue/ Group/Subgroup/Sex: 1/1/M 2/1/M 3/1/M 4/1/M 1/1/F 2/1/F 3/1/F 4/1/F

Observation Number of Animals:  22  26  19  27  30  27  26  25

‑‑‑‑‑‑‑‑‑‑‑‑‑‑‑‑‑‑‑‑‑‑‑‑‑‑‑‑‑‑‑‑‑‑‑‑‑‑‑‑‑‑‑‑‑‑‑‑‑‑‑‑‑‑‑‑‑‑‑‑‑‑‑‑‑‑‑‑‑‑‑‑‑‑‑‑‑‑‑‑‑‑‑‑‑‑‑‑‑‑‑‑‑‑‑‑‑‑‑‑‑‑‑‑‑‑‑‑

Unremarkable:   0   2   0   4   0   1   0   2

Lacrimal Gland Number Examined:   0   1   2   1   1   0   0   0

Unremarkable:   0   0   0   0   0   0   0   0

Discolored   0   1   2   1   1   0   0   0

Liver Number Examined:  22  26  19  27  30  27  26  25

Unremarkable:  21  23  16  22  29  24  26  24

Abnormal shape   0   0   0   0   0   1   0   0

Cyst   0   0   0   0   0   0   0   1

Discolored   1   3   3   3   1   2   0   1

Large   0   0   1   1   0   0   0   0

Raised area   0   0   0   1   0   0   0   0

Rough surface   0   0   0   1   0   0   0   0

Lung Number Examined:  22  26  19  27  30  27  26  25

Unremarkable:  17  24  14  23  27  22  26  25

Adhesion   0   1   1   0   0   0   0   0

Discolored   5   1   3   4   3   4   0   0

Mass   0   0   1   0   0   0   0   0

Raised area   0   0   2   0   0   1   0   0

‑‑‑‑‑‑‑‑‑‑‑‑‑‑‑‑‑‑‑‑‑‑‑‑‑‑‑‑‑‑‑‑‑‑‑‑‑‑‑‑‑‑‑‑‑‑‑‑‑‑‑‑‑‑‑‑‑‑‑‑‑‑‑‑‑‑‑‑‑‑‑‑‑‑‑‑‑‑‑‑‑‑‑‑‑‑‑‑‑‑‑‑‑‑‑‑‑‑‑‑‑‑‑‑‑‑‑

Table

Incidence of Macroscopic Observations

Unscheduled Euthanasias and Deaths

Test Article (dosage) 1M 2M 3M 4M 1F 2F 3F 4F

‑‑‑‑‑‑‑‑‑‑‑‑‑‑‑‑‑‑‑‑‑‑‑‑‑‑‑ ‑‑‑‑‑‑‑‑ ‑‑ ‑‑ ‑‑ ‑‑ ‑‑ ‑‑ ‑‑ ‑‑

Benzonatate (PF‑00345410) mg/kg/day 0 10 30 90 0 5 15 50

‑‑‑‑‑‑‑‑‑‑‑‑‑‑‑‑‑‑‑‑‑‑‑‑‑‑‑‑‑‑‑‑‑‑‑‑‑‑‑‑‑‑‑‑‑‑‑‑‑‑‑‑‑‑‑‑‑‑‑‑‑‑‑‑‑‑‑‑‑‑‑‑‑‑‑‑‑‑‑‑‑‑‑‑‑‑‑‑‑‑‑‑‑‑‑‑‑‑‑‑‑‑‑‑‑‑‑‑

Tissue/ Group/Subgroup/Sex: 1/1/M 2/1/M 3/1/M 4/1/M 1/1/F 2/1/F 3/1/F 4/1/F

Observation Number of Animals:  22  26  19  27  30  27  26  25

‑‑‑‑‑‑‑‑‑‑‑‑‑‑‑‑‑‑‑‑‑‑‑‑‑‑‑‑‑‑‑‑‑‑‑‑‑‑‑‑‑‑‑‑‑‑‑‑‑‑‑‑‑‑‑‑‑‑‑‑‑‑‑‑‑‑‑‑‑‑‑‑‑‑‑‑‑‑‑‑‑‑‑‑‑‑‑‑‑‑‑‑‑‑‑‑‑‑‑‑‑‑‑‑‑‑‑‑

Unremarkable:   0   2   0   4   0   1   0   2

Lymph Node,

Inguinal Number Examined: 22 26 19 27 30 27 26 25

Unremarkable: 22 24 18 26 29 22 26 18

Discolored   0   0   0   0   0   0   0   2

Large   0   0   0   0   1   2   0   3

Not identified   0   2   1   1   0   3   0   3

Lymph Node,

Mesenteric Number Examined: 22 26 19 27 30 27 26 25

Unremarkable: 21 25 19 24 29 26 26 24

Discolored   1   0   0   2   0   0   0   0

Large   0   1   0   1   1   1   0   1

Mass   0   0   0   1   0   0   0   0

Lymph Node, Other Number Examined:   3   1   2   4   0   4   2   3

Unremarkable:   0   0   0   0   0   0   0   0

Discolored   2   1   1   1   0   1   0   2

Large   2   0   2   3   0   3   2   2

Mass   0   0   0   1   0   0   0   0

‑‑‑‑‑‑‑‑‑‑‑‑‑‑‑‑‑‑‑‑‑‑‑‑‑‑‑‑‑‑‑‑‑‑‑‑‑‑‑‑‑‑‑‑‑‑‑‑‑‑‑‑‑‑‑‑‑‑‑‑‑‑‑‑‑‑‑‑‑‑‑‑‑‑‑‑‑‑‑‑‑‑‑‑‑‑‑‑‑‑‑‑‑‑‑‑‑‑‑‑‑‑‑‑‑‑‑

Table

Incidence of Macroscopic Observations

Unscheduled Euthanasias and Deaths

Test Article (dosage) 1M 2M 3M 4M 1F 2F 3F 4F

‑‑‑‑‑‑‑‑‑‑‑‑‑‑‑‑‑‑‑‑‑‑‑‑‑‑‑ ‑‑‑‑‑‑‑‑ ‑‑ ‑‑ ‑‑ ‑‑ ‑‑ ‑‑ ‑‑ ‑‑

Benzonatate (PF‑00345410) mg/kg/day 0 10 30 90 0 5 15 50

‑‑‑‑‑‑‑‑‑‑‑‑‑‑‑‑‑‑‑‑‑‑‑‑‑‑‑‑‑‑‑‑‑‑‑‑‑‑‑‑‑‑‑‑‑‑‑‑‑‑‑‑‑‑‑‑‑‑‑‑‑‑‑‑‑‑‑‑‑‑‑‑‑‑‑‑‑‑‑‑‑‑‑‑‑‑‑‑‑‑‑‑‑‑‑‑‑‑‑‑‑‑‑‑‑‑‑‑

Tissue/ Group/Subgroup/Sex: 1/1/M 2/1/M 3/1/M 4/1/M 1/1/F 2/1/F 3/1/F 4/1/F

Observation Number of Animals:  22  26  19  27  30  27  26  25

‑‑‑‑‑‑‑‑‑‑‑‑‑‑‑‑‑‑‑‑‑‑‑‑‑‑‑‑‑‑‑‑‑‑‑‑‑‑‑‑‑‑‑‑‑‑‑‑‑‑‑‑‑‑‑‑‑‑‑‑‑‑‑‑‑‑‑‑‑‑‑‑‑‑‑‑‑‑‑‑‑‑‑‑‑‑‑‑‑‑‑‑‑‑‑‑‑‑‑‑‑‑‑‑‑‑‑‑

Unremarkable:   0   2   0   4   0   1   0   2

Mammary Gland,

Female Number Examined: 0 0 0 0 30 27 26 25

Unremarkable: 0 0 0 0 18 15 17 16

Cyst   0   0   0   0   3   3   2   3

Firm   0   0   0   0   0   0   0   1

Mass   0   0   0   0   9   9   9   7

Thickened   0   0   0   0   3   4   3   4

Mammary Gland,

Male Number Examined: 22 26 19 27 0 0 0 0

Unremarkable: 19 25 17 26 0 0 0 0

Mass   3   1   2   1   0   0   0   0

Mandibular

Salivary Gland Number Examined: 22 26 19 27 30 27 26 25

Unremarkable: 22 26 19 26 30 27 26 25

Mass   0   0   0   1   0   0   0   0

Mesentery Number Examined:   0   0   0   0   1   0   0   0

Unremarkable:   0   0   0   0   0   0   0   0

Large vessel   0   0   0   0   1   0   0   0

‑‑‑‑‑‑‑‑‑‑‑‑‑‑‑‑‑‑‑‑‑‑‑‑‑‑‑‑‑‑‑‑‑‑‑‑‑‑‑‑‑‑‑‑‑‑‑‑‑‑‑‑‑‑‑‑‑‑‑‑‑‑‑‑‑‑‑‑‑‑‑‑‑‑‑‑‑‑‑‑‑‑‑‑‑‑‑‑‑‑‑‑‑‑‑‑‑‑‑‑‑‑‑‑‑‑‑

Table

Incidence of Macroscopic Observations

Unscheduled Euthanasias and Deaths

Test Article (dosage) 1M 2M 3M 4M 1F 2F 3F 4F

‑‑‑‑‑‑‑‑‑‑‑‑‑‑‑‑‑‑‑‑‑‑‑‑‑‑‑ ‑‑‑‑‑‑‑‑ ‑‑ ‑‑ ‑‑ ‑‑ ‑‑ ‑‑ ‑‑ ‑‑

Benzonatate (PF‑00345410) mg/kg/day 0 10 30 90 0 5 15 50

‑‑‑‑‑‑‑‑‑‑‑‑‑‑‑‑‑‑‑‑‑‑‑‑‑‑‑‑‑‑‑‑‑‑‑‑‑‑‑‑‑‑‑‑‑‑‑‑‑‑‑‑‑‑‑‑‑‑‑‑‑‑‑‑‑‑‑‑‑‑‑‑‑‑‑‑‑‑‑‑‑‑‑‑‑‑‑‑‑‑‑‑‑‑‑‑‑‑‑‑‑‑‑‑‑‑‑‑

Tissue/ Group/Subgroup/Sex: 1/1/M 2/1/M 3/1/M 4/1/M 1/1/F 2/1/F 3/1/F 4/1/F

Observation Number of Animals:  22  26  19  27  30  27  26  25

‑‑‑‑‑‑‑‑‑‑‑‑‑‑‑‑‑‑‑‑‑‑‑‑‑‑‑‑‑‑‑‑‑‑‑‑‑‑‑‑‑‑‑‑‑‑‑‑‑‑‑‑‑‑‑‑‑‑‑‑‑‑‑‑‑‑‑‑‑‑‑‑‑‑‑‑‑‑‑‑‑‑‑‑‑‑‑‑‑‑‑‑‑‑‑‑‑‑‑‑‑‑‑‑‑‑‑‑

Unremarkable:   0   2   0   4   0   1   0   2

Muscle, Other Number Examined:   0   0   0   0   0   0   1   0

Unremarkable:   0   0   0   0   0   0   0   0

Firm   0   0   0   0   0   0   1   0

Ovary Number Examined:   0   0   0   0  30  27  26  25

Unremarkable:   0   0   0   0  28  22  24  25

Cyst   0   0   0   0   2   4   1   0

Mass   0   0   0   0   0   1   1   0

Oviduct Number Examined:   0   0   0   0  30  27  26  25

Unremarkable:   0   0   0   0  30  26  25  25

Not identified   0   0   0   0   0   1   1   0

Pancreas Number Examined:  22  26  19  27  30  27  26  25

Unremarkable:  22  26  19  27  30  27  25  24

Mass   0   0   0   0   0   0   1   1

Parathyroid Number Examined:  22  26  19  27  30  27  26  25

Unremarkable:  22  25  19  27  30  27  26  25

Large   0   1   0   0   0   0   0   0

‑‑‑‑‑‑‑‑‑‑‑‑‑‑‑‑‑‑‑‑‑‑‑‑‑‑‑‑‑‑‑‑‑‑‑‑‑‑‑‑‑‑‑‑‑‑‑‑‑‑‑‑‑‑‑‑‑‑‑‑‑‑‑‑‑‑‑‑‑‑‑‑‑‑‑‑‑‑‑‑‑‑‑‑‑‑‑‑‑‑‑‑‑‑‑‑‑‑‑‑‑‑‑‑‑‑‑

Table

Incidence of Macroscopic Observations

Unscheduled Euthanasias and Deaths

Test Article (dosage) 1M 2M 3M 4M 1F 2F 3F 4F

‑‑‑‑‑‑‑‑‑‑‑‑‑‑‑‑‑‑‑‑‑‑‑‑‑‑‑ ‑‑‑‑‑‑‑‑ ‑‑ ‑‑ ‑‑ ‑‑ ‑‑ ‑‑ ‑‑ ‑‑

Benzonatate (PF‑00345410) mg/kg/day 0 10 30 90 0 5 15 50

‑‑‑‑‑‑‑‑‑‑‑‑‑‑‑‑‑‑‑‑‑‑‑‑‑‑‑‑‑‑‑‑‑‑‑‑‑‑‑‑‑‑‑‑‑‑‑‑‑‑‑‑‑‑‑‑‑‑‑‑‑‑‑‑‑‑‑‑‑‑‑‑‑‑‑‑‑‑‑‑‑‑‑‑‑‑‑‑‑‑‑‑‑‑‑‑‑‑‑‑‑‑‑‑‑‑‑‑

Tissue/ Group/Subgroup/Sex: 1/1/M 2/1/M 3/1/M 4/1/M 1/1/F 2/1/F 3/1/F 4/1/F

Observation Number of Animals:  22  26  19  27  30  27  26  25

‑‑‑‑‑‑‑‑‑‑‑‑‑‑‑‑‑‑‑‑‑‑‑‑‑‑‑‑‑‑‑‑‑‑‑‑‑‑‑‑‑‑‑‑‑‑‑‑‑‑‑‑‑‑‑‑‑‑‑‑‑‑‑‑‑‑‑‑‑‑‑‑‑‑‑‑‑‑‑‑‑‑‑‑‑‑‑‑‑‑‑‑‑‑‑‑‑‑‑‑‑‑‑‑‑‑‑‑

Unremarkable:   0   2   0   4   0   1   0   2

Pituitary Number Examined:  22  26  19  27  30  27  26  25

Unremarkable:  14  15  11  19   9  11  10  10

Discolored   0   1   0   0   1   0   1   1

Large   0   1   0   0   0   0   1   0

Mass   8   9   8   8  20  16  15  14

Preputial Gland Number Examined:  22  26  19  27   0   0   0   0

Unremarkable:  22  26  17  27   0   0   0   0

Large   0   0   2   0   0   0   0   0

Prostate Number Examined:  22  26  19  27   0   0   0   0

Unremarkable:  21  25  18  25   0   0   0   0

Firm   1   0   0   0   0   0   0   0

Gelatinous   0   0   0   1   0   0   0   0

Large   0   0   0   1   0   0   0   0

Nodule   0   0   0   1   0   0   0   0

Small   0   1   1   1   0   0   0   0

Rectum Number Examined:  22  26  19  27  30  27  26  25

Unremarkable:  22  26  18  27  30  27  26  25

Abnormal contents   0   0   1   0   0   0   0   0

‑‑‑‑‑‑‑‑‑‑‑‑‑‑‑‑‑‑‑‑‑‑‑‑‑‑‑‑‑‑‑‑‑‑‑‑‑‑‑‑‑‑‑‑‑‑‑‑‑‑‑‑‑‑‑‑‑‑‑‑‑‑‑‑‑‑‑‑‑‑‑‑‑‑‑‑‑‑‑‑‑‑‑‑‑‑‑‑‑‑‑‑‑‑‑‑‑‑‑‑‑‑‑‑‑‑‑

Table

Incidence of Macroscopic Observations

Unscheduled Euthanasias and Deaths

Test Article (dosage) 1M 2M 3M 4M 1F 2F 3F 4F

‑‑‑‑‑‑‑‑‑‑‑‑‑‑‑‑‑‑‑‑‑‑‑‑‑‑‑ ‑‑‑‑‑‑‑‑ ‑‑ ‑‑ ‑‑ ‑‑ ‑‑ ‑‑ ‑‑ ‑‑

Benzonatate (PF‑00345410) mg/kg/day 0 10 30 90 0 5 15 50

‑‑‑‑‑‑‑‑‑‑‑‑‑‑‑‑‑‑‑‑‑‑‑‑‑‑‑‑‑‑‑‑‑‑‑‑‑‑‑‑‑‑‑‑‑‑‑‑‑‑‑‑‑‑‑‑‑‑‑‑‑‑‑‑‑‑‑‑‑‑‑‑‑‑‑‑‑‑‑‑‑‑‑‑‑‑‑‑‑‑‑‑‑‑‑‑‑‑‑‑‑‑‑‑‑‑‑‑

Tissue/ Group/Subgroup/Sex: 1/1/M 2/1/M 3/1/M 4/1/M 1/1/F 2/1/F 3/1/F 4/1/F

Observation Number of Animals:  22  26  19  27  30  27  26  25

‑‑‑‑‑‑‑‑‑‑‑‑‑‑‑‑‑‑‑‑‑‑‑‑‑‑‑‑‑‑‑‑‑‑‑‑‑‑‑‑‑‑‑‑‑‑‑‑‑‑‑‑‑‑‑‑‑‑‑‑‑‑‑‑‑‑‑‑‑‑‑‑‑‑‑‑‑‑‑‑‑‑‑‑‑‑‑‑‑‑‑‑‑‑‑‑‑‑‑‑‑‑‑‑‑‑‑‑

Unremarkable:   0   2   0   4   0   1   0   2

Seminal Vesicle Number Examined:  22  26  19  27   0   0   0   0

Unremarkable:  19  22  17  23   0   0   0   0

Small   3   4   2   4   0   0   0   0

Skin/Subcutis Number Examined:  22  26  19  27  30  27  26  25

Unremarkable:  18  20  16  18  22  25  24  22

Alopecia   0   1   0   0   1   0   0   0

Broken skin   0   0   1   0   0   0   0   0

Discolored   0   0   0   1   0   0   0   0

Mass   2   3   0   5   3   1   0   1

Raised area   0   0   1   1   0   0   0   0

Scab   2   3   0   2   2   0   2   2

Scaly skin   1   0   0   0   0   1   0   0

Sore   0   1   1   1   2   1   0   1

Spleen Number Examined:  22  26  19  27  30  27  26  25

Unremarkable:  21  25  17  23  26  25  23  23

Large   1   1   2   4   4   2   3   2

‑‑‑‑‑‑‑‑‑‑‑‑‑‑‑‑‑‑‑‑‑‑‑‑‑‑‑‑‑‑‑‑‑‑‑‑‑‑‑‑‑‑‑‑‑‑‑‑‑‑‑‑‑‑‑‑‑‑‑‑‑‑‑‑‑‑‑‑‑‑‑‑‑‑‑‑‑‑‑‑‑‑‑‑‑‑‑‑‑‑‑‑‑‑‑‑‑‑‑‑‑‑‑‑‑‑‑

Table

Incidence of Macroscopic Observations

Unscheduled Euthanasias and Deaths

Test Article (dosage) 1M 2M 3M 4M 1F 2F 3F 4F

‑‑‑‑‑‑‑‑‑‑‑‑‑‑‑‑‑‑‑‑‑‑‑‑‑‑‑ ‑‑‑‑‑‑‑‑ ‑‑ ‑‑ ‑‑ ‑‑ ‑‑ ‑‑ ‑‑ ‑‑

Benzonatate (PF‑00345410) mg/kg/day 0 10 30 90 0 5 15 50

‑‑‑‑‑‑‑‑‑‑‑‑‑‑‑‑‑‑‑‑‑‑‑‑‑‑‑‑‑‑‑‑‑‑‑‑‑‑‑‑‑‑‑‑‑‑‑‑‑‑‑‑‑‑‑‑‑‑‑‑‑‑‑‑‑‑‑‑‑‑‑‑‑‑‑‑‑‑‑‑‑‑‑‑‑‑‑‑‑‑‑‑‑‑‑‑‑‑‑‑‑‑‑‑‑‑‑‑

Tissue/ Group/Subgroup/Sex: 1/1/M 2/1/M 3/1/M 4/1/M 1/1/F 2/1/F 3/1/F 4/1/F

Observation Number of Animals:  22  26  19  27  30  27  26  25

‑‑‑‑‑‑‑‑‑‑‑‑‑‑‑‑‑‑‑‑‑‑‑‑‑‑‑‑‑‑‑‑‑‑‑‑‑‑‑‑‑‑‑‑‑‑‑‑‑‑‑‑‑‑‑‑‑‑‑‑‑‑‑‑‑‑‑‑‑‑‑‑‑‑‑‑‑‑‑‑‑‑‑‑‑‑‑‑‑‑‑‑‑‑‑‑‑‑‑‑‑‑‑‑‑‑‑‑

Unremarkable:   0   2   0   4   0   1   0   2

Stomach Number Examined:  22  26  19  27  30  27  26  25

Unremarkable:  17  21  17  23  24  24  24  20

Abnormal contents   1   1   0   0   2   0   0   1

Depressed area   1   0   1   1   1   0   0   1

Discolored   0   2   1   3   2   0   1   2

Large   1   0   0   0   1   1   0   1

Mass   1   0   0   0   0   0   1   0

Raised area   1   0   0   0   0   1   0   0

Rough surface   0   2   0   0   1   0   0   0

Thickened   1   0   0   0   1   0   0   1

Ulceration   2   0   0   0   0   1   0   0

Tail Number Examined:   0   1   0   0   0   0   0   0

Unremarkable:   0   0   0   0   0   0   0   0

Mass   0   1   0   0   0   0   0   0

Testis Number Examined:  22  26  19  27   0   0   0   0

Unremarkable:  17  23  18  26   0   0   0   0

Large   1   0   0   0   0   0   0   0

Small   2   1   0   0   0   0   0   0

Soft   4   3   1   1   0   0   0   0

‑‑‑‑‑‑‑‑‑‑‑‑‑‑‑‑‑‑‑‑‑‑‑‑‑‑‑‑‑‑‑‑‑‑‑‑‑‑‑‑‑‑‑‑‑‑‑‑‑‑‑‑‑‑‑‑‑‑‑‑‑‑‑‑‑‑‑‑‑‑‑‑‑‑‑‑‑‑‑‑‑‑‑‑‑‑‑‑‑‑‑‑‑‑‑‑‑‑‑‑‑‑‑‑‑‑‑

Table

Incidence of Macroscopic Observations

Unscheduled Euthanasias and Deaths

Test Article (dosage) 1M 2M 3M 4M 1F 2F 3F 4F

‑‑‑‑‑‑‑‑‑‑‑‑‑‑‑‑‑‑‑‑‑‑‑‑‑‑‑ ‑‑‑‑‑‑‑‑ ‑‑ ‑‑ ‑‑ ‑‑ ‑‑ ‑‑ ‑‑ ‑‑

Benzonatate (PF‑00345410) mg/kg/day 0 10 30 90 0 5 15 50

‑‑‑‑‑‑‑‑‑‑‑‑‑‑‑‑‑‑‑‑‑‑‑‑‑‑‑‑‑‑‑‑‑‑‑‑‑‑‑‑‑‑‑‑‑‑‑‑‑‑‑‑‑‑‑‑‑‑‑‑‑‑‑‑‑‑‑‑‑‑‑‑‑‑‑‑‑‑‑‑‑‑‑‑‑‑‑‑‑‑‑‑‑‑‑‑‑‑‑‑‑‑‑‑‑‑‑‑

Tissue/ Group/Subgroup/Sex: 1/1/M 2/1/M 3/1/M 4/1/M 1/1/F 2/1/F 3/1/F 4/1/F

Observation Number of Animals:  22  26  19  27  30  27  26  25

‑‑‑‑‑‑‑‑‑‑‑‑‑‑‑‑‑‑‑‑‑‑‑‑‑‑‑‑‑‑‑‑‑‑‑‑‑‑‑‑‑‑‑‑‑‑‑‑‑‑‑‑‑‑‑‑‑‑‑‑‑‑‑‑‑‑‑‑‑‑‑‑‑‑‑‑‑‑‑‑‑‑‑‑‑‑‑‑‑‑‑‑‑‑‑‑‑‑‑‑‑‑‑‑‑‑‑‑

Unremarkable:   0   2   0   4   0   1   0   2

Thoracic Cavity Number Examined:   1   0   1   0   0   0   0   0

Unremarkable:   0   0   0   0   0   0   0   0

Abnormal contents   1   0   1   0   0   0   0   0

Thymus Number Examined:  22  26  19  27  30  27  26  25

Unremarkable:  21  19  18  25  26  22  25  23

Discolored   0   4   0   0   0   0   0   0

Firm   0   0   0   0   0   0   0   1

Large   0   0   0   0   2   0   0   1

Mass   0   0   0   0   1   1   1   0

Not identified   1   3   1   2   1   4   0   1

Thyroid Number Examined:  22  26  19  27  30  27  26  25

Unremarkable:  21  24  18  21  28  27  26  24

Cyst   0   0   0   1   0   0   0   1

Large   1   2   1   5   2   0   0   0

Tooth, Other Number Examined:   0   0   1   0   0   0   0   0

Unremarkable:   0   0   0   0   0   0   0   0

Mass   0   0   1   0   0   0   0   0

‑‑‑‑‑‑‑‑‑‑‑‑‑‑‑‑‑‑‑‑‑‑‑‑‑‑‑‑‑‑‑‑‑‑‑‑‑‑‑‑‑‑‑‑‑‑‑‑‑‑‑‑‑‑‑‑‑‑‑‑‑‑‑‑‑‑‑‑‑‑‑‑‑‑‑‑‑‑‑‑‑‑‑‑‑‑‑‑‑‑‑‑‑‑‑‑‑‑‑‑‑‑‑‑‑‑‑

Table

Incidence of Macroscopic Observations

Unscheduled Euthanasias and Deaths

Test Article (dosage) 1M 2M 3M 4M 1F 2F 3F 4F

‑‑‑‑‑‑‑‑‑‑‑‑‑‑‑‑‑‑‑‑‑‑‑‑‑‑‑ ‑‑‑‑‑‑‑‑ ‑‑ ‑‑ ‑‑ ‑‑ ‑‑ ‑‑ ‑‑ ‑‑

Benzonatate (PF‑00345410) mg/kg/day 0 10 30 90 0 5 15 50

‑‑‑‑‑‑‑‑‑‑‑‑‑‑‑‑‑‑‑‑‑‑‑‑‑‑‑‑‑‑‑‑‑‑‑‑‑‑‑‑‑‑‑‑‑‑‑‑‑‑‑‑‑‑‑‑‑‑‑‑‑‑‑‑‑‑‑‑‑‑‑‑‑‑‑‑‑‑‑‑‑‑‑‑‑‑‑‑‑‑‑‑‑‑‑‑‑‑‑‑‑‑‑‑‑‑‑‑

Tissue/ Group/Subgroup/Sex: 1/1/M 2/1/M 3/1/M 4/1/M 1/1/F 2/1/F 3/1/F 4/1/F

Observation Number of Animals:  22  26  19  27  30  27  26  25

‑‑‑‑‑‑‑‑‑‑‑‑‑‑‑‑‑‑‑‑‑‑‑‑‑‑‑‑‑‑‑‑‑‑‑‑‑‑‑‑‑‑‑‑‑‑‑‑‑‑‑‑‑‑‑‑‑‑‑‑‑‑‑‑‑‑‑‑‑‑‑‑‑‑‑‑‑‑‑‑‑‑‑‑‑‑‑‑‑‑‑‑‑‑‑‑‑‑‑‑‑‑‑‑‑‑‑‑

Unremarkable:   0   2   0   4   0   1   0   2

Trachea Number Examined:  22  26  19  27  30  27  26  25

Unremarkable:  22  25  19  27  30  27  26  25

Abnormal contents   0   1   0   0   0   0   0   0

Ureter Number Examined:  22  26  19  27  30  27  26  25

Unremarkable:  21  25  19  27  29  26  22  24

Large   1   1   0   0   1   1   3   0

Not identified   0   0   0   0   0   0   1   1

Urinary Bladder Number Examined:  22  26  19  27  30  27  26  25

Unremarkable:  21  25  19  27  29  26  24  25

Abnormal contents   1   1   0   0   0   0   1   0

Calculus   0   0   0   0   0   0   1   0

Discolored   1   0   0   0   0   0   0   0

Large   1   1   0   0   0   0   2   0

Not identified   0   0   0   0   0   1   0   0

Thickened   0   0   0   0   1   0   2   0

‑‑‑‑‑‑‑‑‑‑‑‑‑‑‑‑‑‑‑‑‑‑‑‑‑‑‑‑‑‑‑‑‑‑‑‑‑‑‑‑‑‑‑‑‑‑‑‑‑‑‑‑‑‑‑‑‑‑‑‑‑‑‑‑‑‑‑‑‑‑‑‑‑‑‑‑‑‑‑‑‑‑‑‑‑‑‑‑‑‑‑‑‑‑‑‑‑‑‑‑‑‑‑‑‑‑‑

Table

Incidence of Macroscopic Observations

Unscheduled Euthanasias and Deaths

Test Article (dosage) 1M 2M 3M 4M 1F 2F 3F 4F

‑‑‑‑‑‑‑‑‑‑‑‑‑‑‑‑‑‑‑‑‑‑‑‑‑‑‑ ‑‑‑‑‑‑‑‑ ‑‑ ‑‑ ‑‑ ‑‑ ‑‑ ‑‑ ‑‑ ‑‑

Benzonatate (PF‑00345410) mg/kg/day 0 10 30 90 0 5 15 50

‑‑‑‑‑‑‑‑‑‑‑‑‑‑‑‑‑‑‑‑‑‑‑‑‑‑‑‑‑‑‑‑‑‑‑‑‑‑‑‑‑‑‑‑‑‑‑‑‑‑‑‑‑‑‑‑‑‑‑‑‑‑‑‑‑‑‑‑‑‑‑‑‑‑‑‑‑‑‑‑‑‑‑‑‑‑‑‑‑‑‑‑‑‑‑‑‑‑‑‑‑‑‑‑‑‑‑‑

Tissue/ Group/Subgroup/Sex: 1/1/M 2/1/M 3/1/M 4/1/M 1/1/F 2/1/F 3/1/F 4/1/F

Observation Number of Animals:  22  26  19  27  30  27  26  25

‑‑‑‑‑‑‑‑‑‑‑‑‑‑‑‑‑‑‑‑‑‑‑‑‑‑‑‑‑‑‑‑‑‑‑‑‑‑‑‑‑‑‑‑‑‑‑‑‑‑‑‑‑‑‑‑‑‑‑‑‑‑‑‑‑‑‑‑‑‑‑‑‑‑‑‑‑‑‑‑‑‑‑‑‑‑‑‑‑‑‑‑‑‑‑‑‑‑‑‑‑‑‑‑‑‑‑‑

Unremarkable:   0   2   0   4   0   1   0   2

Uterus Number Examined:   0   0   0   0  30  27  26  25

Unremarkable:   0   0   0   0  22  25  21  21

Abnormal contents   0   0   0   0   1   1   2   0

Cyst   0   0   0   0   6   1   1   0

Large   0   0   0   0   1   0   3   0

Mass   0   0   0   0   2   0   0   2

Small   0   0   0   0   0   0   0   1

Thickened wall   0   0   0   0   0   0   0   1

Vagina Number Examined:   0   0   0   0  30  27  26  25

Unremarkable:   0   0   0   0  29  25  24  23

Abnormal contents   0   0   0   0   0   0   0   1

Large   0   0   0   0   0   0   0   1

Mass   0   0   0   0   1   1   1   1

Prolapsed   0   0   0   0   0   1   1   0

‑‑‑‑‑‑‑‑‑‑‑‑‑‑‑‑‑‑‑‑‑‑‑‑‑‑‑‑‑‑‑‑‑‑‑‑‑‑‑‑‑‑‑‑‑‑‑‑‑‑‑‑‑‑‑‑‑‑‑‑‑‑‑‑‑‑‑‑‑‑‑‑‑‑‑‑‑‑‑‑‑‑‑‑‑‑‑‑‑‑‑‑‑‑‑‑‑‑‑‑‑‑‑‑‑‑‑

Table 5.3: Incidence of Macroscopic Observations - All Animals

Test Article (dosage) 1M 2M 3M 4M 1F 2F 3F 4F

‑‑‑‑‑‑‑‑‑‑‑‑‑‑‑‑‑‑‑‑‑‑‑‑‑‑‑ ‑‑‑‑‑‑‑‑ ‑‑ ‑‑ ‑‑ ‑‑ ‑‑ ‑‑ ‑‑ ‑‑

Benzonatate (PF‑00345410) mg/kg/day 0 10 30 90 0 5 15 50

‑‑‑‑‑‑‑‑‑‑‑‑‑‑‑‑‑‑‑‑‑‑‑‑‑‑‑‑‑‑‑‑‑‑‑‑‑‑‑‑‑‑‑‑‑‑‑‑‑‑‑‑‑‑‑‑‑‑‑‑‑‑‑‑‑‑‑‑‑‑‑‑‑‑‑‑‑‑‑‑‑‑‑‑‑‑‑‑‑‑‑‑‑‑‑‑‑‑‑‑‑‑‑‑‑‑‑‑

Tissue/ Group/Subgroup/Sex: 1/1/M 2/1/M 3/1/M 4/1/M 1/1/F 2/1/F 3/1/F 4/1/F

Observation Number of Animals:  55  50  50  55  55  50  50  55

‑‑‑‑‑‑‑‑‑‑‑‑‑‑‑‑‑‑‑‑‑‑‑‑‑‑‑‑‑‑‑‑‑‑‑‑‑‑‑‑‑‑‑‑‑‑‑‑‑‑‑‑‑‑‑‑‑‑‑‑‑‑‑‑‑‑‑‑‑‑‑‑‑‑‑‑‑‑‑‑‑‑‑‑‑‑‑‑‑‑‑‑‑‑‑‑‑‑‑‑‑‑‑‑‑‑‑‑

Unremarkable:   5   6   6  12   4   3   8   4

Abdominal Cavity Number Examined:   0   1   0   1   1   1   1   0

Unremarkable:   0   0   0   0   0   0   0   0

Abnormal contents   0   1   0   1   0   0   0   0

Mass   0   0   0   0   1   1   1   0

Adipose, Other Number Examined:   0   0   0   0   5   0   0   4

Unremarkable:   0   0   0   0   0   0   0   0

Mass   0   0   0   0   4   0   0   2

Thickened   0   0   0   0   1   0   0   2

Adipose, White,

Kidney Fat Pad Number Examined: 0 0 1 0 0 0 0 0

Unremarkable: 0 0 0 0 0 0 0 0

Thickened   0   0   1   0   0   0   0   0

‑‑‑‑‑‑‑‑‑‑‑‑‑‑‑‑‑‑‑‑‑‑‑‑‑‑‑‑‑‑‑‑‑‑‑‑‑‑‑‑‑‑‑‑‑‑‑‑‑‑‑‑‑‑‑‑‑‑‑‑‑‑‑‑‑‑‑‑‑‑‑‑‑‑‑‑‑‑‑‑‑‑‑‑‑‑‑‑‑‑‑‑‑‑‑‑‑‑‑‑‑‑‑‑‑‑‑

Table

Incidence of Macroscopic Observations

All Animals

Test Article (dosage) 1M 2M 3M 4M 1F 2F 3F 4F

‑‑‑‑‑‑‑‑‑‑‑‑‑‑‑‑‑‑‑‑‑‑‑‑‑‑‑ ‑‑‑‑‑‑‑‑ ‑‑ ‑‑ ‑‑ ‑‑ ‑‑ ‑‑ ‑‑ ‑‑

Benzonatate (PF‑00345410) mg/kg/day 0 10 30 90 0 5 15 50

‑‑‑‑‑‑‑‑‑‑‑‑‑‑‑‑‑‑‑‑‑‑‑‑‑‑‑‑‑‑‑‑‑‑‑‑‑‑‑‑‑‑‑‑‑‑‑‑‑‑‑‑‑‑‑‑‑‑‑‑‑‑‑‑‑‑‑‑‑‑‑‑‑‑‑‑‑‑‑‑‑‑‑‑‑‑‑‑‑‑‑‑‑‑‑‑‑‑‑‑‑‑‑‑‑‑‑‑

Tissue/ Group/Subgroup/Sex: 1/1/M 2/1/M 3/1/M 4/1/M 1/1/F 2/1/F 3/1/F 4/1/F

Observation Number of Animals:  55  50  50  55  55  50  50  55

‑‑‑‑‑‑‑‑‑‑‑‑‑‑‑‑‑‑‑‑‑‑‑‑‑‑‑‑‑‑‑‑‑‑‑‑‑‑‑‑‑‑‑‑‑‑‑‑‑‑‑‑‑‑‑‑‑‑‑‑‑‑‑‑‑‑‑‑‑‑‑‑‑‑‑‑‑‑‑‑‑‑‑‑‑‑‑‑‑‑‑‑‑‑‑‑‑‑‑‑‑‑‑‑‑‑‑‑

Unremarkable:   5   6   6  12   4   3   8   4

Adrenal Number Examined:  55  50  50  55  55  50  50  55

Unremarkable:  55  44  46  51  48  41  45  50

Cyst   0   0   0   0   0   1   0   0

Discolored   0   1   2   2   5   4   3   4

Large   0   4   2   2   2   5   1   1

Mass   0   0   0   0   0   0   1   0

Raised area   0   1   0   0   0   0   0   0

Small   0   0   0   0   1   0   0   0

Bone, Other Number Examined:   2   0   1   1   0   0   0   0

Unremarkable:   1   0   0   0   0   0   0   0

Large   1   0   1   0   0   0   0   0

Raised area   0   0   0   1   0   0   0   0

Brain Number Examined:  55  50  50  55  55  50  50  55

Unremarkable:  42  39  43  42  33  26  32  35

Depressed area  12  11   7  11  22  24  18  20

Discolored   0   0   0   1   0   0   0   0

Large   1   0   0   0   0   0   0   0

Soft   1   0   0   1   0   0   0   0

‑‑‑‑‑‑‑‑‑‑‑‑‑‑‑‑‑‑‑‑‑‑‑‑‑‑‑‑‑‑‑‑‑‑‑‑‑‑‑‑‑‑‑‑‑‑‑‑‑‑‑‑‑‑‑‑‑‑‑‑‑‑‑‑‑‑‑‑‑‑‑‑‑‑‑‑‑‑‑‑‑‑‑‑‑‑‑‑‑‑‑‑‑‑‑‑‑‑‑‑‑‑‑‑‑‑‑

Table

Incidence of Macroscopic Observations

All Animals

Test Article (dosage) 1M 2M 3M 4M 1F 2F 3F 4F

‑‑‑‑‑‑‑‑‑‑‑‑‑‑‑‑‑‑‑‑‑‑‑‑‑‑‑ ‑‑‑‑‑‑‑‑ ‑‑ ‑‑ ‑‑ ‑‑ ‑‑ ‑‑ ‑‑ ‑‑

Benzonatate (PF‑00345410) mg/kg/day 0 10 30 90 0 5 15 50

‑‑‑‑‑‑‑‑‑‑‑‑‑‑‑‑‑‑‑‑‑‑‑‑‑‑‑‑‑‑‑‑‑‑‑‑‑‑‑‑‑‑‑‑‑‑‑‑‑‑‑‑‑‑‑‑‑‑‑‑‑‑‑‑‑‑‑‑‑‑‑‑‑‑‑‑‑‑‑‑‑‑‑‑‑‑‑‑‑‑‑‑‑‑‑‑‑‑‑‑‑‑‑‑‑‑‑‑

Tissue/ Group/Subgroup/Sex: 1/1/M 2/1/M 3/1/M 4/1/M 1/1/F 2/1/F 3/1/F 4/1/F

Observation Number of Animals:  55  50  50  55  55  50  50  55

‑‑‑‑‑‑‑‑‑‑‑‑‑‑‑‑‑‑‑‑‑‑‑‑‑‑‑‑‑‑‑‑‑‑‑‑‑‑‑‑‑‑‑‑‑‑‑‑‑‑‑‑‑‑‑‑‑‑‑‑‑‑‑‑‑‑‑‑‑‑‑‑‑‑‑‑‑‑‑‑‑‑‑‑‑‑‑‑‑‑‑‑‑‑‑‑‑‑‑‑‑‑‑‑‑‑‑‑

Unremarkable:   5   6   6  12   4   3   8   4

Cecum Number Examined:  55  50  50  55  55  50  50  55

Unremarkable:  55  49  49  54  55  50  50  55

Abnormal contents   0   1   1   0   0   0   0   0

Mass   0   0   0   1   0   0   0   0

Cervix Number Examined:   0   0   0   0  55  50  50  55

Unremarkable:   0   0   0   0  53  47  45  51

Discolored   0   0   0   0   0   1   0   0

Firm   0   0   0   0   0   1   0   1

Large   0   0   0   0   1   3   0   3

Mass   0   0   0   0   1   0   5   1

Clitoral Gland Number Examined:   0   0   0   0  55  50  50  55

Unremarkable:   0   0   0   0  52  47  49  50

Discolored   0   0   0   0   1   1   0   0

Large   0   0   0   0   0   2   1   2

Mass   0   0   0   0   1   0   0   0

Not identified   0   0   0   0   1   1   0   4

‑‑‑‑‑‑‑‑‑‑‑‑‑‑‑‑‑‑‑‑‑‑‑‑‑‑‑‑‑‑‑‑‑‑‑‑‑‑‑‑‑‑‑‑‑‑‑‑‑‑‑‑‑‑‑‑‑‑‑‑‑‑‑‑‑‑‑‑‑‑‑‑‑‑‑‑‑‑‑‑‑‑‑‑‑‑‑‑‑‑‑‑‑‑‑‑‑‑‑‑‑‑‑‑‑‑‑

Table

Incidence of Macroscopic Observations

All Animals

Test Article (dosage) 1M 2M 3M 4M 1F 2F 3F 4F

‑‑‑‑‑‑‑‑‑‑‑‑‑‑‑‑‑‑‑‑‑‑‑‑‑‑‑ ‑‑‑‑‑‑‑‑ ‑‑ ‑‑ ‑‑ ‑‑ ‑‑ ‑‑ ‑‑ ‑‑

Benzonatate (PF‑00345410) mg/kg/day 0 10 30 90 0 5 15 50

‑‑‑‑‑‑‑‑‑‑‑‑‑‑‑‑‑‑‑‑‑‑‑‑‑‑‑‑‑‑‑‑‑‑‑‑‑‑‑‑‑‑‑‑‑‑‑‑‑‑‑‑‑‑‑‑‑‑‑‑‑‑‑‑‑‑‑‑‑‑‑‑‑‑‑‑‑‑‑‑‑‑‑‑‑‑‑‑‑‑‑‑‑‑‑‑‑‑‑‑‑‑‑‑‑‑‑‑

Tissue/ Group/Subgroup/Sex: 1/1/M 2/1/M 3/1/M 4/1/M 1/1/F 2/1/F 3/1/F 4/1/F

Observation Number of Animals:  55  50  50  55  55  50  50  55

‑‑‑‑‑‑‑‑‑‑‑‑‑‑‑‑‑‑‑‑‑‑‑‑‑‑‑‑‑‑‑‑‑‑‑‑‑‑‑‑‑‑‑‑‑‑‑‑‑‑‑‑‑‑‑‑‑‑‑‑‑‑‑‑‑‑‑‑‑‑‑‑‑‑‑‑‑‑‑‑‑‑‑‑‑‑‑‑‑‑‑‑‑‑‑‑‑‑‑‑‑‑‑‑‑‑‑‑

Unremarkable:   5   6   6  12   4   3   8   4

Colon Number Examined:  55  50  50  55  55  50  50  55

Unremarkable:  55  49  49  55  55  50  50  55

Abnormal contents   0   1   1   0   0   0   0   0

Duodenum Number Examined:  55  50  50  55  55  50  50  55

Unremarkable:  55  49  50  55  55  50  50  55

Abnormal contents   0   1   0   0   0   0   0   0

Epididymis Number Examined:  55  50  50  55   0   0   0   0

Unremarkable:  51  49  49  54   0   0   0   0

Cyst   0   0   0   1   0   0   0   0

Large   1   1   0   0   0   0   0   0

Small   3   0   1   0   0   0   0   0

Esophagus Number Examined:  55  50  50  55  55  50  50  55

Unremarkable:  55  50  50  55  54  50  50  55

Perforation   0   0   0   0   1   0   0   0

‑‑‑‑‑‑‑‑‑‑‑‑‑‑‑‑‑‑‑‑‑‑‑‑‑‑‑‑‑‑‑‑‑‑‑‑‑‑‑‑‑‑‑‑‑‑‑‑‑‑‑‑‑‑‑‑‑‑‑‑‑‑‑‑‑‑‑‑‑‑‑‑‑‑‑‑‑‑‑‑‑‑‑‑‑‑‑‑‑‑‑‑‑‑‑‑‑‑‑‑‑‑‑‑‑‑‑

Table

Incidence of Macroscopic Observations

All Animals

Test Article (dosage) 1M 2M 3M 4M 1F 2F 3F 4F

‑‑‑‑‑‑‑‑‑‑‑‑‑‑‑‑‑‑‑‑‑‑‑‑‑‑‑ ‑‑‑‑‑‑‑‑ ‑‑ ‑‑ ‑‑ ‑‑ ‑‑ ‑‑ ‑‑ ‑‑

Benzonatate (PF‑00345410) mg/kg/day 0 10 30 90 0 5 15 50

‑‑‑‑‑‑‑‑‑‑‑‑‑‑‑‑‑‑‑‑‑‑‑‑‑‑‑‑‑‑‑‑‑‑‑‑‑‑‑‑‑‑‑‑‑‑‑‑‑‑‑‑‑‑‑‑‑‑‑‑‑‑‑‑‑‑‑‑‑‑‑‑‑‑‑‑‑‑‑‑‑‑‑‑‑‑‑‑‑‑‑‑‑‑‑‑‑‑‑‑‑‑‑‑‑‑‑‑

Tissue/ Group/Subgroup/Sex: 1/1/M 2/1/M 3/1/M 4/1/M 1/1/F 2/1/F 3/1/F 4/1/F

Observation Number of Animals:  55  50  50  55  55  50  50  55

‑‑‑‑‑‑‑‑‑‑‑‑‑‑‑‑‑‑‑‑‑‑‑‑‑‑‑‑‑‑‑‑‑‑‑‑‑‑‑‑‑‑‑‑‑‑‑‑‑‑‑‑‑‑‑‑‑‑‑‑‑‑‑‑‑‑‑‑‑‑‑‑‑‑‑‑‑‑‑‑‑‑‑‑‑‑‑‑‑‑‑‑‑‑‑‑‑‑‑‑‑‑‑‑‑‑‑‑

Unremarkable:   5   6   6  12   4   3   8   4

Eye Number Examined:  55  50  50  55  55  50  50  55

Unremarkable:  55  50  49  54  55  50  49  55

Discolored   0   0   1   1   0   0   0   0

Protruding   0   0   1   1   0   0   0   0

Raised area   0   0   0   0   0   0   1   0

Foot/Footpad Number Examined:  12   4  11   7   1   3   3   6

Unremarkable:   0   0   0   0   0   0   0   0

Discolored   1   0   0   0   0   0   0   1

Raised area   0   0   0   1   0   0   0   0

Scab   5   4   1   3   0   0   3   3

Scaly skin   3   1   1   1   0   1   0   1

Sore   5   0  11   3   1   2   0   1

Swollen   2   0   3   1   0   0   0   0

Harderian Gland Number Examined:  55  50  50  55  55  50  50  55

Unremarkable:  55  48  50  55  55  49  50  54

Discolored   0   2   0   0   0   1   0   1

‑‑‑‑‑‑‑‑‑‑‑‑‑‑‑‑‑‑‑‑‑‑‑‑‑‑‑‑‑‑‑‑‑‑‑‑‑‑‑‑‑‑‑‑‑‑‑‑‑‑‑‑‑‑‑‑‑‑‑‑‑‑‑‑‑‑‑‑‑‑‑‑‑‑‑‑‑‑‑‑‑‑‑‑‑‑‑‑‑‑‑‑‑‑‑‑‑‑‑‑‑‑‑‑‑‑‑

Table

Incidence of Macroscopic Observations

All Animals

Test Article (dosage) 1M 2M 3M 4M 1F 2F 3F 4F

‑‑‑‑‑‑‑‑‑‑‑‑‑‑‑‑‑‑‑‑‑‑‑‑‑‑‑ ‑‑‑‑‑‑‑‑ ‑‑ ‑‑ ‑‑ ‑‑ ‑‑ ‑‑ ‑‑ ‑‑

Benzonatate (PF‑00345410) mg/kg/day 0 10 30 90 0 5 15 50

‑‑‑‑‑‑‑‑‑‑‑‑‑‑‑‑‑‑‑‑‑‑‑‑‑‑‑‑‑‑‑‑‑‑‑‑‑‑‑‑‑‑‑‑‑‑‑‑‑‑‑‑‑‑‑‑‑‑‑‑‑‑‑‑‑‑‑‑‑‑‑‑‑‑‑‑‑‑‑‑‑‑‑‑‑‑‑‑‑‑‑‑‑‑‑‑‑‑‑‑‑‑‑‑‑‑‑‑

Tissue/ Group/Subgroup/Sex: 1/1/M 2/1/M 3/1/M 4/1/M 1/1/F 2/1/F 3/1/F 4/1/F

Observation Number of Animals:  55  50  50  55  55  50  50  55

‑‑‑‑‑‑‑‑‑‑‑‑‑‑‑‑‑‑‑‑‑‑‑‑‑‑‑‑‑‑‑‑‑‑‑‑‑‑‑‑‑‑‑‑‑‑‑‑‑‑‑‑‑‑‑‑‑‑‑‑‑‑‑‑‑‑‑‑‑‑‑‑‑‑‑‑‑‑‑‑‑‑‑‑‑‑‑‑‑‑‑‑‑‑‑‑‑‑‑‑‑‑‑‑‑‑‑‑

Unremarkable:   5   6   6  12   4   3   8   4

Heart Number Examined:  55  50  50  55  55  50  50  55

Unremarkable:  55  48  50  55  55  50  50  55

Discolored   0   1   0   0   0   0   0   0

Thickened   0   1   0   0   0   0   0   0

Ileum Number Examined:  55  50  50  55  55  50  50  55

Unremarkable:  55  49  49  55  55  50  50  55

Abnormal contents   0   1   1   0   0   0   0   0

Jejunum Number Examined:  55  50  50  55  55  50  50  55

Unremarkable:  55  48  49  54  55  50  50  55

Abnormal contents   0   1   1   0   0   0   0   0

Large   0   1   0   0   0   0   0   0

Mass   0   0   1   0   0   0   0   0

Raised area   0   0   0   1   0   0   0   0

Thickened wall   0   1   0   0   0   0   0   0

Joint, Other Number Examined:   1   1   0   0   0   0   0   0

Unremarkable:   0   0   0   0   0   0   0   0

Large   1   1   0   0   0   0   0   0

‑‑‑‑‑‑‑‑‑‑‑‑‑‑‑‑‑‑‑‑‑‑‑‑‑‑‑‑‑‑‑‑‑‑‑‑‑‑‑‑‑‑‑‑‑‑‑‑‑‑‑‑‑‑‑‑‑‑‑‑‑‑‑‑‑‑‑‑‑‑‑‑‑‑‑‑‑‑‑‑‑‑‑‑‑‑‑‑‑‑‑‑‑‑‑‑‑‑‑‑‑‑‑‑‑‑‑

Table

Incidence of Macroscopic Observations

All Animals

Test Article (dosage) 1M 2M 3M 4M 1F 2F 3F 4F

‑‑‑‑‑‑‑‑‑‑‑‑‑‑‑‑‑‑‑‑‑‑‑‑‑‑‑ ‑‑‑‑‑‑‑‑ ‑‑ ‑‑ ‑‑ ‑‑ ‑‑ ‑‑ ‑‑ ‑‑

Benzonatate (PF‑00345410) mg/kg/day 0 10 30 90 0 5 15 50

‑‑‑‑‑‑‑‑‑‑‑‑‑‑‑‑‑‑‑‑‑‑‑‑‑‑‑‑‑‑‑‑‑‑‑‑‑‑‑‑‑‑‑‑‑‑‑‑‑‑‑‑‑‑‑‑‑‑‑‑‑‑‑‑‑‑‑‑‑‑‑‑‑‑‑‑‑‑‑‑‑‑‑‑‑‑‑‑‑‑‑‑‑‑‑‑‑‑‑‑‑‑‑‑‑‑‑‑

Tissue/ Group/Subgroup/Sex: 1/1/M 2/1/M 3/1/M 4/1/M 1/1/F 2/1/F 3/1/F 4/1/F

Observation Number of Animals:  55  50  50  55  55  50  50  55

‑‑‑‑‑‑‑‑‑‑‑‑‑‑‑‑‑‑‑‑‑‑‑‑‑‑‑‑‑‑‑‑‑‑‑‑‑‑‑‑‑‑‑‑‑‑‑‑‑‑‑‑‑‑‑‑‑‑‑‑‑‑‑‑‑‑‑‑‑‑‑‑‑‑‑‑‑‑‑‑‑‑‑‑‑‑‑‑‑‑‑‑‑‑‑‑‑‑‑‑‑‑‑‑‑‑‑‑

Unremarkable:   5   6   6  12   4   3   8   4

Kidney Number Examined:  55  50  50  55  55  50  50  55

Unremarkable:  53  46  48  53  54  47  47  53

Calculus   0   0   0   0   0   0   1   1

Cyst   1   0   0   0   0   1   0   0

Discolored   0   0   0   0   0   2   0   1

Large   1   2   2   2   1   1   2   1

Mass   0   1   0   0   0   0   1   0

Raised area   0   1   0   0   0   0   0   0

Lacrimal Gland Number Examined:   2   1   3   6   1   0   0   0

Unremarkable:   0   0   0   0   0   0   0   0

Discolored   2   1   3   6   1   0   0   0

‑‑‑‑‑‑‑‑‑‑‑‑‑‑‑‑‑‑‑‑‑‑‑‑‑‑‑‑‑‑‑‑‑‑‑‑‑‑‑‑‑‑‑‑‑‑‑‑‑‑‑‑‑‑‑‑‑‑‑‑‑‑‑‑‑‑‑‑‑‑‑‑‑‑‑‑‑‑‑‑‑‑‑‑‑‑‑‑‑‑‑‑‑‑‑‑‑‑‑‑‑‑‑‑‑‑‑

Table

Incidence of Macroscopic Observations

All Animals

Test Article (dosage) 1M 2M 3M 4M 1F 2F 3F 4F

‑‑‑‑‑‑‑‑‑‑‑‑‑‑‑‑‑‑‑‑‑‑‑‑‑‑‑ ‑‑‑‑‑‑‑‑ ‑‑ ‑‑ ‑‑ ‑‑ ‑‑ ‑‑ ‑‑ ‑‑

Benzonatate (PF‑00345410) mg/kg/day 0 10 30 90 0 5 15 50

‑‑‑‑‑‑‑‑‑‑‑‑‑‑‑‑‑‑‑‑‑‑‑‑‑‑‑‑‑‑‑‑‑‑‑‑‑‑‑‑‑‑‑‑‑‑‑‑‑‑‑‑‑‑‑‑‑‑‑‑‑‑‑‑‑‑‑‑‑‑‑‑‑‑‑‑‑‑‑‑‑‑‑‑‑‑‑‑‑‑‑‑‑‑‑‑‑‑‑‑‑‑‑‑‑‑‑‑

Tissue/ Group/Subgroup/Sex: 1/1/M 2/1/M 3/1/M 4/1/M 1/1/F 2/1/F 3/1/F 4/1/F

Observation Number of Animals:  55  50  50  55  55  50  50  55

‑‑‑‑‑‑‑‑‑‑‑‑‑‑‑‑‑‑‑‑‑‑‑‑‑‑‑‑‑‑‑‑‑‑‑‑‑‑‑‑‑‑‑‑‑‑‑‑‑‑‑‑‑‑‑‑‑‑‑‑‑‑‑‑‑‑‑‑‑‑‑‑‑‑‑‑‑‑‑‑‑‑‑‑‑‑‑‑‑‑‑‑‑‑‑‑‑‑‑‑‑‑‑‑‑‑‑‑

Unremarkable:   5   6   6  12   4   3   8   4

Liver Number Examined:  55  50  50  55  55  50  50  55

Unremarkable:  46  40  44  42  52  43  48  50

Abnormal shape   0   0   0   0   0   1   0   0

Cyst   0   0   1   0   0   0   1   1

Discolored   9   9   5  10   2   6   1   4

Large   0   0   1   1   0   0   0   0

Mass   0   0   0   0   1   0   0   0

Raised area   0   1   0   2   0   0   0   0

Rough surface   0   0   0   1   0   0   0   1

Lung Number Examined:  55  50  50  55  55  50  50  55

Unremarkable:  48  47  45  50  51  43  49  54

Adhesion   0   1   1   0   0   0   0   0

Discolored   7   2   3   5   3   6   1   1

Mass   0   0   1   0   0   0   0   0

Raised area   0   0   2   0   1   1   0   0

‑‑‑‑‑‑‑‑‑‑‑‑‑‑‑‑‑‑‑‑‑‑‑‑‑‑‑‑‑‑‑‑‑‑‑‑‑‑‑‑‑‑‑‑‑‑‑‑‑‑‑‑‑‑‑‑‑‑‑‑‑‑‑‑‑‑‑‑‑‑‑‑‑‑‑‑‑‑‑‑‑‑‑‑‑‑‑‑‑‑‑‑‑‑‑‑‑‑‑‑‑‑‑‑‑‑‑

Table

Incidence of Macroscopic Observations

All Animals

Test Article (dosage) 1M 2M 3M 4M 1F 2F 3F 4F

‑‑‑‑‑‑‑‑‑‑‑‑‑‑‑‑‑‑‑‑‑‑‑‑‑‑‑ ‑‑‑‑‑‑‑‑ ‑‑ ‑‑ ‑‑ ‑‑ ‑‑ ‑‑ ‑‑ ‑‑

Benzonatate (PF‑00345410) mg/kg/day 0 10 30 90 0 5 15 50

‑‑‑‑‑‑‑‑‑‑‑‑‑‑‑‑‑‑‑‑‑‑‑‑‑‑‑‑‑‑‑‑‑‑‑‑‑‑‑‑‑‑‑‑‑‑‑‑‑‑‑‑‑‑‑‑‑‑‑‑‑‑‑‑‑‑‑‑‑‑‑‑‑‑‑‑‑‑‑‑‑‑‑‑‑‑‑‑‑‑‑‑‑‑‑‑‑‑‑‑‑‑‑‑‑‑‑‑

Tissue/ Group/Subgroup/Sex: 1/1/M 2/1/M 3/1/M 4/1/M 1/1/F 2/1/F 3/1/F 4/1/F

Observation Number of Animals:  55  50  50  55  55  50  50  55

‑‑‑‑‑‑‑‑‑‑‑‑‑‑‑‑‑‑‑‑‑‑‑‑‑‑‑‑‑‑‑‑‑‑‑‑‑‑‑‑‑‑‑‑‑‑‑‑‑‑‑‑‑‑‑‑‑‑‑‑‑‑‑‑‑‑‑‑‑‑‑‑‑‑‑‑‑‑‑‑‑‑‑‑‑‑‑‑‑‑‑‑‑‑‑‑‑‑‑‑‑‑‑‑‑‑‑‑

Unremarkable:   5   6   6  12   4   3   8   4

Lymph Node,

Inguinal Number Examined: 55 50 50 55 55 50 50 55

Unremarkable: 54 48 49 53 54 44 50 47

Discolored   0   0   0   0   0   0   0   2

Large   0   0   0   1   1   2   0   3

Not identified   1   2   1   1   0   4   0   4

Lymph Node,

Mesenteric Number Examined: 55 50 50 55 55 50 50 55

Unremarkable: 51 49 49 52 54 48 47 53

Discolored   4   0   1   2   0   0   1   0

Large   1   1   0   1   1   2   2   2

Mass   0   0   0   1   0   0   0   0

Lymph Node, Other Number Examined:   4   3   5   5   1   5   3   5

Unremarkable:   0   0   0   0   0   0   0   0

Discolored   2   1   2   2   0   1   0   2

Large   3   2   5   3   1   4   3   4

Mass   0   0   0   1   0   0   0   0

‑‑‑‑‑‑‑‑‑‑‑‑‑‑‑‑‑‑‑‑‑‑‑‑‑‑‑‑‑‑‑‑‑‑‑‑‑‑‑‑‑‑‑‑‑‑‑‑‑‑‑‑‑‑‑‑‑‑‑‑‑‑‑‑‑‑‑‑‑‑‑‑‑‑‑‑‑‑‑‑‑‑‑‑‑‑‑‑‑‑‑‑‑‑‑‑‑‑‑‑‑‑‑‑‑‑‑

Table

Incidence of Macroscopic Observations

All Animals

Test Article (dosage) 1M 2M 3M 4M 1F 2F 3F 4F

‑‑‑‑‑‑‑‑‑‑‑‑‑‑‑‑‑‑‑‑‑‑‑‑‑‑‑ ‑‑‑‑‑‑‑‑ ‑‑ ‑‑ ‑‑ ‑‑ ‑‑ ‑‑ ‑‑ ‑‑

Benzonatate (PF‑00345410) mg/kg/day 0 10 30 90 0 5 15 50

‑‑‑‑‑‑‑‑‑‑‑‑‑‑‑‑‑‑‑‑‑‑‑‑‑‑‑‑‑‑‑‑‑‑‑‑‑‑‑‑‑‑‑‑‑‑‑‑‑‑‑‑‑‑‑‑‑‑‑‑‑‑‑‑‑‑‑‑‑‑‑‑‑‑‑‑‑‑‑‑‑‑‑‑‑‑‑‑‑‑‑‑‑‑‑‑‑‑‑‑‑‑‑‑‑‑‑‑

Tissue/ Group/Subgroup/Sex: 1/1/M 2/1/M 3/1/M 4/1/M 1/1/F 2/1/F 3/1/F 4/1/F

Observation Number of Animals:  55  50  50  55  55  50  50  55

‑‑‑‑‑‑‑‑‑‑‑‑‑‑‑‑‑‑‑‑‑‑‑‑‑‑‑‑‑‑‑‑‑‑‑‑‑‑‑‑‑‑‑‑‑‑‑‑‑‑‑‑‑‑‑‑‑‑‑‑‑‑‑‑‑‑‑‑‑‑‑‑‑‑‑‑‑‑‑‑‑‑‑‑‑‑‑‑‑‑‑‑‑‑‑‑‑‑‑‑‑‑‑‑‑‑‑‑

Unremarkable:   5   6   6  12   4   3   8   4

Mammary Gland,

Female Number Examined: 0 0 0 0 55 50 50 55

Unremarkable: 0 0 0 0 37 31 38 36

Cyst   0   0   0   0   3   3   2   3

Firm   0   0   0   0   0   0   0   1

Mass   0   0   0   0  15  16  12  17

Thickened   0   0   0   0   3   4   3   4

Mammary Gland,

Male Number Examined: 55 50 50 55 0 0 0 0

Unremarkable: 52 49 48 54 0 0 0 0

Mass   3   1   2   1   0   0   0   0

Mandibular

Salivary Gland Number Examined: 55 50 50 55 55 50 50 55

Unremarkable: 55 50 50 54 55 50 50 55

Mass   0   0   0   1   0   0   0   0

‑‑‑‑‑‑‑‑‑‑‑‑‑‑‑‑‑‑‑‑‑‑‑‑‑‑‑‑‑‑‑‑‑‑‑‑‑‑‑‑‑‑‑‑‑‑‑‑‑‑‑‑‑‑‑‑‑‑‑‑‑‑‑‑‑‑‑‑‑‑‑‑‑‑‑‑‑‑‑‑‑‑‑‑‑‑‑‑‑‑‑‑‑‑‑‑‑‑‑‑‑‑‑‑‑‑‑

Table

Incidence of Macroscopic Observations

All Animals

Test Article (dosage) 1M 2M 3M 4M 1F 2F 3F 4F

‑‑‑‑‑‑‑‑‑‑‑‑‑‑‑‑‑‑‑‑‑‑‑‑‑‑‑ ‑‑‑‑‑‑‑‑ ‑‑ ‑‑ ‑‑ ‑‑ ‑‑ ‑‑ ‑‑ ‑‑

Benzonatate (PF‑00345410) mg/kg/day 0 10 30 90 0 5 15 50

‑‑‑‑‑‑‑‑‑‑‑‑‑‑‑‑‑‑‑‑‑‑‑‑‑‑‑‑‑‑‑‑‑‑‑‑‑‑‑‑‑‑‑‑‑‑‑‑‑‑‑‑‑‑‑‑‑‑‑‑‑‑‑‑‑‑‑‑‑‑‑‑‑‑‑‑‑‑‑‑‑‑‑‑‑‑‑‑‑‑‑‑‑‑‑‑‑‑‑‑‑‑‑‑‑‑‑‑

Tissue/ Group/Subgroup/Sex: 1/1/M 2/1/M 3/1/M 4/1/M 1/1/F 2/1/F 3/1/F 4/1/F

Observation Number of Animals:  55  50  50  55  55  50  50  55

‑‑‑‑‑‑‑‑‑‑‑‑‑‑‑‑‑‑‑‑‑‑‑‑‑‑‑‑‑‑‑‑‑‑‑‑‑‑‑‑‑‑‑‑‑‑‑‑‑‑‑‑‑‑‑‑‑‑‑‑‑‑‑‑‑‑‑‑‑‑‑‑‑‑‑‑‑‑‑‑‑‑‑‑‑‑‑‑‑‑‑‑‑‑‑‑‑‑‑‑‑‑‑‑‑‑‑‑

Unremarkable:   5   6   6  12   4   3   8   4

Mesentery Number Examined:   0   0   0   0   2   0   0   1

Unremarkable:   0   0   0   0   0   0   0   0

Large vessel   0   0   0   0   1   0   0   0

Mass   0   0   0   0   1   0   0   1

Muscle, Other Number Examined:   0   0   0   0   0   0   1   0

Unremarkable:   0   0   0   0   0   0   0   0

Firm   0   0   0   0   0   0   1   0

Nerve, Optic Number Examined:  55  50  50  55  55  50  50  55

Unremarkable:  54  50  50  55  55  50  50  55

Small   1   0   0   0   0   0   0   0

Ovary Number Examined:   0   0   0   0  55  50  50  55

Unremarkable:   0   0   0   0  52  41  45  50

Cyst   0   0   0   0   3   7   3   5

Discolored   0   0   0   0   0   1   0   0

Mass   0   0   0   0   0   1   2   0

‑‑‑‑‑‑‑‑‑‑‑‑‑‑‑‑‑‑‑‑‑‑‑‑‑‑‑‑‑‑‑‑‑‑‑‑‑‑‑‑‑‑‑‑‑‑‑‑‑‑‑‑‑‑‑‑‑‑‑‑‑‑‑‑‑‑‑‑‑‑‑‑‑‑‑‑‑‑‑‑‑‑‑‑‑‑‑‑‑‑‑‑‑‑‑‑‑‑‑‑‑‑‑‑‑‑‑

Table

Incidence of Macroscopic Observations

All Animals

Test Article (dosage) 1M 2M 3M 4M 1F 2F 3F 4F

‑‑‑‑‑‑‑‑‑‑‑‑‑‑‑‑‑‑‑‑‑‑‑‑‑‑‑ ‑‑‑‑‑‑‑‑ ‑‑ ‑‑ ‑‑ ‑‑ ‑‑ ‑‑ ‑‑ ‑‑

Benzonatate (PF‑00345410) mg/kg/day 0 10 30 90 0 5 15 50

‑‑‑‑‑‑‑‑‑‑‑‑‑‑‑‑‑‑‑‑‑‑‑‑‑‑‑‑‑‑‑‑‑‑‑‑‑‑‑‑‑‑‑‑‑‑‑‑‑‑‑‑‑‑‑‑‑‑‑‑‑‑‑‑‑‑‑‑‑‑‑‑‑‑‑‑‑‑‑‑‑‑‑‑‑‑‑‑‑‑‑‑‑‑‑‑‑‑‑‑‑‑‑‑‑‑‑‑

Tissue/ Group/Subgroup/Sex: 1/1/M 2/1/M 3/1/M 4/1/M 1/1/F 2/1/F 3/1/F 4/1/F

Observation Number of Animals:  55  50  50  55  55  50  50  55

‑‑‑‑‑‑‑‑‑‑‑‑‑‑‑‑‑‑‑‑‑‑‑‑‑‑‑‑‑‑‑‑‑‑‑‑‑‑‑‑‑‑‑‑‑‑‑‑‑‑‑‑‑‑‑‑‑‑‑‑‑‑‑‑‑‑‑‑‑‑‑‑‑‑‑‑‑‑‑‑‑‑‑‑‑‑‑‑‑‑‑‑‑‑‑‑‑‑‑‑‑‑‑‑‑‑‑‑

Unremarkable:   5   6   6  12   4   3   8   4

Oviduct Number Examined:   0   0   0   0  55  50  50  55

Unremarkable:   0   0   0   0  55  49  49  55

Not identified   0   0   0   0   0   1   1   0

Pancreas Number Examined:  55  50  50  55  55  50  50  55

Unremarkable:  55  50  50  55  55  50  48  54

Mass   0   0   0   0   0   0   2   1

Parathyroid Number Examined:  55  50  50  55  55  50  50  55

Unremarkable:  55  49  50  55  55  50  50  55

Large   0   1   0   0   0   0   0   0

Pituitary Number Examined:  55  50  50  55  55  50  50  55

Unremarkable:  42  37  42  45  21  21  23  25

Discolored   0   1   0   0   4   1   5   4

Large   0   1   0   0   0   2   1   0

Mass  13  11   8  10  29  26  22  26

Raised area   0   0   0   0   1   0   0   0

‑‑‑‑‑‑‑‑‑‑‑‑‑‑‑‑‑‑‑‑‑‑‑‑‑‑‑‑‑‑‑‑‑‑‑‑‑‑‑‑‑‑‑‑‑‑‑‑‑‑‑‑‑‑‑‑‑‑‑‑‑‑‑‑‑‑‑‑‑‑‑‑‑‑‑‑‑‑‑‑‑‑‑‑‑‑‑‑‑‑‑‑‑‑‑‑‑‑‑‑‑‑‑‑‑‑‑

Table

Incidence of Macroscopic Observations

All Animals

Test Article (dosage) 1M 2M 3M 4M 1F 2F 3F 4F

‑‑‑‑‑‑‑‑‑‑‑‑‑‑‑‑‑‑‑‑‑‑‑‑‑‑‑ ‑‑‑‑‑‑‑‑ ‑‑ ‑‑ ‑‑ ‑‑ ‑‑ ‑‑ ‑‑ ‑‑

Benzonatate (PF‑00345410) mg/kg/day 0 10 30 90 0 5 15 50

‑‑‑‑‑‑‑‑‑‑‑‑‑‑‑‑‑‑‑‑‑‑‑‑‑‑‑‑‑‑‑‑‑‑‑‑‑‑‑‑‑‑‑‑‑‑‑‑‑‑‑‑‑‑‑‑‑‑‑‑‑‑‑‑‑‑‑‑‑‑‑‑‑‑‑‑‑‑‑‑‑‑‑‑‑‑‑‑‑‑‑‑‑‑‑‑‑‑‑‑‑‑‑‑‑‑‑‑

Tissue/ Group/Subgroup/Sex: 1/1/M 2/1/M 3/1/M 4/1/M 1/1/F 2/1/F 3/1/F 4/1/F

Observation Number of Animals:  55  50  50  55  55  50  50  55

‑‑‑‑‑‑‑‑‑‑‑‑‑‑‑‑‑‑‑‑‑‑‑‑‑‑‑‑‑‑‑‑‑‑‑‑‑‑‑‑‑‑‑‑‑‑‑‑‑‑‑‑‑‑‑‑‑‑‑‑‑‑‑‑‑‑‑‑‑‑‑‑‑‑‑‑‑‑‑‑‑‑‑‑‑‑‑‑‑‑‑‑‑‑‑‑‑‑‑‑‑‑‑‑‑‑‑‑

Unremarkable:   5   6   6  12   4   3   8   4

Preputial Gland Number Examined:  55  50  50  55   0   0   0   0

Unremarkable:  54  49  48  55   0   0   0   0

Discolored   0   1   0   0   0   0   0   0

Large   0   0   2   0   0   0   0   0

Not present   1   0   0   0   0   0   0   0

Prostate Number Examined:  55  50  50  55   0   0   0   0

Unremarkable:  54  49  47  53   0   0   0   0

Discolored   0   0   1   0   0   0   0   0

Firm   1   0   0   0   0   0   0   0

Gelatinous   0   0   0   1   0   0   0   0

Large   0   0   0   1   0   0   0   0

Mass   0   0   1   0   0   0   0   0

Nodule   0   0   0   1   0   0   0   0

Small   0   1   1   1   0   0   0   0

Rectum Number Examined:  55  50  50  55  55  50  50  55

Unremarkable:  55  50  49  55  55  50  50  55

Abnormal contents   0   0   1   0   0   0   0   0

‑‑‑‑‑‑‑‑‑‑‑‑‑‑‑‑‑‑‑‑‑‑‑‑‑‑‑‑‑‑‑‑‑‑‑‑‑‑‑‑‑‑‑‑‑‑‑‑‑‑‑‑‑‑‑‑‑‑‑‑‑‑‑‑‑‑‑‑‑‑‑‑‑‑‑‑‑‑‑‑‑‑‑‑‑‑‑‑‑‑‑‑‑‑‑‑‑‑‑‑‑‑‑‑‑‑‑

Table

Incidence of Macroscopic Observations

All Animals

Test Article (dosage) 1M 2M 3M 4M 1F 2F 3F 4F

‑‑‑‑‑‑‑‑‑‑‑‑‑‑‑‑‑‑‑‑‑‑‑‑‑‑‑ ‑‑‑‑‑‑‑‑ ‑‑ ‑‑ ‑‑ ‑‑ ‑‑ ‑‑ ‑‑ ‑‑

Benzonatate (PF‑00345410) mg/kg/day 0 10 30 90 0 5 15 50

‑‑‑‑‑‑‑‑‑‑‑‑‑‑‑‑‑‑‑‑‑‑‑‑‑‑‑‑‑‑‑‑‑‑‑‑‑‑‑‑‑‑‑‑‑‑‑‑‑‑‑‑‑‑‑‑‑‑‑‑‑‑‑‑‑‑‑‑‑‑‑‑‑‑‑‑‑‑‑‑‑‑‑‑‑‑‑‑‑‑‑‑‑‑‑‑‑‑‑‑‑‑‑‑‑‑‑‑

Tissue/ Group/Subgroup/Sex: 1/1/M 2/1/M 3/1/M 4/1/M 1/1/F 2/1/F 3/1/F 4/1/F

Observation Number of Animals:  55  50  50  55  55  50  50  55

‑‑‑‑‑‑‑‑‑‑‑‑‑‑‑‑‑‑‑‑‑‑‑‑‑‑‑‑‑‑‑‑‑‑‑‑‑‑‑‑‑‑‑‑‑‑‑‑‑‑‑‑‑‑‑‑‑‑‑‑‑‑‑‑‑‑‑‑‑‑‑‑‑‑‑‑‑‑‑‑‑‑‑‑‑‑‑‑‑‑‑‑‑‑‑‑‑‑‑‑‑‑‑‑‑‑‑‑

Unremarkable:   5   6   6  12   4   3   8   4

Seminal Vesicle Number Examined:  55  50  50  55   0   0   0   0

Unremarkable:  50  46  47  51   0   0   0   0

Large   0   0   1   0   0   0   0   0

Small   5   4   2   4   0   0   0   0

Skin/Subcutis Number Examined:  55  50  50  55  55  50  50  55

Unremarkable:  40  39  44  39  44  47  44  46

Alopecia   2   2   0   0   1   0   0   0

Broken skin   0   0   1   0   0   0   0   0

Discolored   1   0   0   2   0   0   0   0

Mass   9   6   2   9   5   1   2   2

Raised area   0   0   2   1   0   0   0   0

Scab   4   4   0   5   2   1   4   7

Scaly skin   1   0   0   0   0   1   0   0

Sore   1   1   1   1   3   1   1   1

Spleen Number Examined:  55  50  50  55  55  50  50  55

Unremarkable:  54  46  48  51  50  47  45  52

Cyst   0   0   0   0   0   1   0   0

Discolored   0   2   0   0   0   0   0   0

Large   1   2   2   4   5   2   5   3

‑‑‑‑‑‑‑‑‑‑‑‑‑‑‑‑‑‑‑‑‑‑‑‑‑‑‑‑‑‑‑‑‑‑‑‑‑‑‑‑‑‑‑‑‑‑‑‑‑‑‑‑‑‑‑‑‑‑‑‑‑‑‑‑‑‑‑‑‑‑‑‑‑‑‑‑‑‑‑‑‑‑‑‑‑‑‑‑‑‑‑‑‑‑‑‑‑‑‑‑‑‑‑‑‑‑‑

Table

Incidence of Macroscopic Observations

All Animals

Test Article (dosage) 1M 2M 3M 4M 1F 2F 3F 4F

‑‑‑‑‑‑‑‑‑‑‑‑‑‑‑‑‑‑‑‑‑‑‑‑‑‑‑ ‑‑‑‑‑‑‑‑ ‑‑ ‑‑ ‑‑ ‑‑ ‑‑ ‑‑ ‑‑ ‑‑

Benzonatate (PF‑00345410) mg/kg/day 0 10 30 90 0 5 15 50

‑‑‑‑‑‑‑‑‑‑‑‑‑‑‑‑‑‑‑‑‑‑‑‑‑‑‑‑‑‑‑‑‑‑‑‑‑‑‑‑‑‑‑‑‑‑‑‑‑‑‑‑‑‑‑‑‑‑‑‑‑‑‑‑‑‑‑‑‑‑‑‑‑‑‑‑‑‑‑‑‑‑‑‑‑‑‑‑‑‑‑‑‑‑‑‑‑‑‑‑‑‑‑‑‑‑‑‑

Tissue/ Group/Subgroup/Sex: 1/1/M 2/1/M 3/1/M 4/1/M 1/1/F 2/1/F 3/1/F 4/1/F

Observation Number of Animals:  55  50  50  55  55  50  50  55

‑‑‑‑‑‑‑‑‑‑‑‑‑‑‑‑‑‑‑‑‑‑‑‑‑‑‑‑‑‑‑‑‑‑‑‑‑‑‑‑‑‑‑‑‑‑‑‑‑‑‑‑‑‑‑‑‑‑‑‑‑‑‑‑‑‑‑‑‑‑‑‑‑‑‑‑‑‑‑‑‑‑‑‑‑‑‑‑‑‑‑‑‑‑‑‑‑‑‑‑‑‑‑‑‑‑‑‑

Unremarkable:   5   6   6  12   4   3   8   4

Stomach Number Examined:  55  50  50  55  55  50  50  55

Unremarkable:  46  41  40  47  47  47  46  50

Abnormal contents   1   1   0   0   2   0   0   1

Depressed area   1   0   1   1   1   0   0   1

Discolored   3   5   9   7   4   0   3   2

Large   1   0   0   0   1   1   0   1

Mass   1   1   0   0   0   0   1   0

Raised area   2   0   0   0   0   1   0   0

Rough surface   0   2   0   0   1   0   0   0

Thickened   1   0   0   0   1   0   0   1

Ulceration   2   0   0   0   0   1   0   0

Tail Number Examined:   0   1   0   0   0   0   0   0

Unremarkable:   0   0   0   0   0   0   0   0

Mass   0   1   0   0   0   0   0   0

‑‑‑‑‑‑‑‑‑‑‑‑‑‑‑‑‑‑‑‑‑‑‑‑‑‑‑‑‑‑‑‑‑‑‑‑‑‑‑‑‑‑‑‑‑‑‑‑‑‑‑‑‑‑‑‑‑‑‑‑‑‑‑‑‑‑‑‑‑‑‑‑‑‑‑‑‑‑‑‑‑‑‑‑‑‑‑‑‑‑‑‑‑‑‑‑‑‑‑‑‑‑‑‑‑‑‑

Table

Incidence of Macroscopic Observations

All Animals

Test Article (dosage) 1M 2M 3M 4M 1F 2F 3F 4F

‑‑‑‑‑‑‑‑‑‑‑‑‑‑‑‑‑‑‑‑‑‑‑‑‑‑‑ ‑‑‑‑‑‑‑‑ ‑‑ ‑‑ ‑‑ ‑‑ ‑‑ ‑‑ ‑‑ ‑‑

Benzonatate (PF‑00345410) mg/kg/day 0 10 30 90 0 5 15 50

‑‑‑‑‑‑‑‑‑‑‑‑‑‑‑‑‑‑‑‑‑‑‑‑‑‑‑‑‑‑‑‑‑‑‑‑‑‑‑‑‑‑‑‑‑‑‑‑‑‑‑‑‑‑‑‑‑‑‑‑‑‑‑‑‑‑‑‑‑‑‑‑‑‑‑‑‑‑‑‑‑‑‑‑‑‑‑‑‑‑‑‑‑‑‑‑‑‑‑‑‑‑‑‑‑‑‑‑

Tissue/ Group/Subgroup/Sex: 1/1/M 2/1/M 3/1/M 4/1/M 1/1/F 2/1/F 3/1/F 4/1/F

Observation Number of Animals:  55  50  50  55  55  50  50  55

‑‑‑‑‑‑‑‑‑‑‑‑‑‑‑‑‑‑‑‑‑‑‑‑‑‑‑‑‑‑‑‑‑‑‑‑‑‑‑‑‑‑‑‑‑‑‑‑‑‑‑‑‑‑‑‑‑‑‑‑‑‑‑‑‑‑‑‑‑‑‑‑‑‑‑‑‑‑‑‑‑‑‑‑‑‑‑‑‑‑‑‑‑‑‑‑‑‑‑‑‑‑‑‑‑‑‑‑

Unremarkable:   5   6   6  12   4   3   8   4

Testis Number Examined:  55  50  50  55   0   0   0   0

Unremarkable:  43  43  48  50   0   0   0   0

Cyst   0   0   0   1   0   0   0   0

Discolored   3   2   0   0   0   0   0   0

Large   2   1   0   1   0   0   0   0

Small   6   2   1   1   0   0   0   0

Soft   7   4   2   3   0   0   0   0

Thoracic Cavity Number Examined:   1   0   1   0   0   0   0   0

Unremarkable:   0   0   0   0   0   0   0   0

Abnormal contents   1   0   1   0   0   0   0   0

Thymus Number Examined:  55  50  50  55  55  50  50  55

Unremarkable:  51  40  43  50  45  39  46  44

Cyst   0   0   0   0   2   0   0   0

Discolored   0   4   0   0   0   0   0   0

Firm   0   0   0   0   0   0   0   1

Large   0   0   0   0   2   0   0   1

Mass   0   0   0   1   3   4   3   2

Not identified   4   6   7   4   3   7   1   8

‑‑‑‑‑‑‑‑‑‑‑‑‑‑‑‑‑‑‑‑‑‑‑‑‑‑‑‑‑‑‑‑‑‑‑‑‑‑‑‑‑‑‑‑‑‑‑‑‑‑‑‑‑‑‑‑‑‑‑‑‑‑‑‑‑‑‑‑‑‑‑‑‑‑‑‑‑‑‑‑‑‑‑‑‑‑‑‑‑‑‑‑‑‑‑‑‑‑‑‑‑‑‑‑‑‑‑

Table

Incidence of Macroscopic Observations

All Animals

Test Article (dosage) 1M 2M 3M 4M 1F 2F 3F 4F

‑‑‑‑‑‑‑‑‑‑‑‑‑‑‑‑‑‑‑‑‑‑‑‑‑‑‑ ‑‑‑‑‑‑‑‑ ‑‑ ‑‑ ‑‑ ‑‑ ‑‑ ‑‑ ‑‑ ‑‑

Benzonatate (PF‑00345410) mg/kg/day 0 10 30 90 0 5 15 50

‑‑‑‑‑‑‑‑‑‑‑‑‑‑‑‑‑‑‑‑‑‑‑‑‑‑‑‑‑‑‑‑‑‑‑‑‑‑‑‑‑‑‑‑‑‑‑‑‑‑‑‑‑‑‑‑‑‑‑‑‑‑‑‑‑‑‑‑‑‑‑‑‑‑‑‑‑‑‑‑‑‑‑‑‑‑‑‑‑‑‑‑‑‑‑‑‑‑‑‑‑‑‑‑‑‑‑‑

Tissue/ Group/Subgroup/Sex: 1/1/M 2/1/M 3/1/M 4/1/M 1/1/F 2/1/F 3/1/F 4/1/F

Observation Number of Animals:  55  50  50  55  55  50  50  55

‑‑‑‑‑‑‑‑‑‑‑‑‑‑‑‑‑‑‑‑‑‑‑‑‑‑‑‑‑‑‑‑‑‑‑‑‑‑‑‑‑‑‑‑‑‑‑‑‑‑‑‑‑‑‑‑‑‑‑‑‑‑‑‑‑‑‑‑‑‑‑‑‑‑‑‑‑‑‑‑‑‑‑‑‑‑‑‑‑‑‑‑‑‑‑‑‑‑‑‑‑‑‑‑‑‑‑‑

Unremarkable:   5   6   6  12   4   3   8   4

Thyroid Number Examined:  55  50  50  55  55  50  50  55

Unremarkable:  49  46  42  47  52  50  49  54

Cyst   3   1   0   1   0   0   0   1

Discolored   0   0   0   0   1   0   0   0

Large   3   4   8   7   2   0   1   0

Tooth, Other Number Examined:   0   0   1   0   0   0   0   0

Unremarkable:   0   0   0   0   0   0   0   0

Mass   0   0   1   0   0   0   0   0

Trachea Number Examined:  55  50  50  55  55  50  50  55

Unremarkable:  55  49  50  55  55  50  50  55

Abnormal contents   0   1   0   0   0   0   0   0

Ureter Number Examined:  55  50  50  55  55  50  50  55

Unremarkable:  54  49  50  55  54  49  45  53

Large   1   1   0   0   1   1   3   0

Not identified   0   0   0   0   0   0   1   2

Raised area   0   0   0   0   0   0   1   0

‑‑‑‑‑‑‑‑‑‑‑‑‑‑‑‑‑‑‑‑‑‑‑‑‑‑‑‑‑‑‑‑‑‑‑‑‑‑‑‑‑‑‑‑‑‑‑‑‑‑‑‑‑‑‑‑‑‑‑‑‑‑‑‑‑‑‑‑‑‑‑‑‑‑‑‑‑‑‑‑‑‑‑‑‑‑‑‑‑‑‑‑‑‑‑‑‑‑‑‑‑‑‑‑‑‑‑

Table

Incidence of Macroscopic Observations

All Animals

Test Article (dosage) 1M 2M 3M 4M 1F 2F 3F 4F

‑‑‑‑‑‑‑‑‑‑‑‑‑‑‑‑‑‑‑‑‑‑‑‑‑‑‑ ‑‑‑‑‑‑‑‑ ‑‑ ‑‑ ‑‑ ‑‑ ‑‑ ‑‑ ‑‑ ‑‑

Benzonatate (PF‑00345410) mg/kg/day 0 10 30 90 0 5 15 50

‑‑‑‑‑‑‑‑‑‑‑‑‑‑‑‑‑‑‑‑‑‑‑‑‑‑‑‑‑‑‑‑‑‑‑‑‑‑‑‑‑‑‑‑‑‑‑‑‑‑‑‑‑‑‑‑‑‑‑‑‑‑‑‑‑‑‑‑‑‑‑‑‑‑‑‑‑‑‑‑‑‑‑‑‑‑‑‑‑‑‑‑‑‑‑‑‑‑‑‑‑‑‑‑‑‑‑‑

Tissue/ Group/Subgroup/Sex: 1/1/M 2/1/M 3/1/M 4/1/M 1/1/F 2/1/F 3/1/F 4/1/F

Observation Number of Animals:  55  50  50  55  55  50  50  55

‑‑‑‑‑‑‑‑‑‑‑‑‑‑‑‑‑‑‑‑‑‑‑‑‑‑‑‑‑‑‑‑‑‑‑‑‑‑‑‑‑‑‑‑‑‑‑‑‑‑‑‑‑‑‑‑‑‑‑‑‑‑‑‑‑‑‑‑‑‑‑‑‑‑‑‑‑‑‑‑‑‑‑‑‑‑‑‑‑‑‑‑‑‑‑‑‑‑‑‑‑‑‑‑‑‑‑‑

Unremarkable:   5   6   6  12   4   3   8   4

Urinary Bladder Number Examined:  55  50  50  55  55  50  50  55

Unremarkable:  54  49  49  55  54  49  48  55

Abnormal contents   1   1   0   0   0   0   1   0

Calculus   0   0   0   0   0   0   1   0

Discolored   1   0   0   0   0   0   0   0

Large   1   1   1   0   0   0   2   0

Not identified   0   0   0   0   0   1   0   0

Thickened   0   0   0   0   1   0   2   0

Uterus Number Examined:   0   0   0   0  55  50  50  55

Unremarkable:   0   0   0   0  44  43  44  50

Abnormal contents   0   0   0   0   1   1   2   0

Cyst   0   0   0   0   7   4   2   1

Discolored   0   0   0   0   0   1   0   0

Intussusception   0   0   0   0   0   1   0   0

Large   0   0   0   0   1   0   3   0

Mass   0   0   0   0   4   0   0   2

Small   0   0   0   0   0   0   0   1

Thickened wall   0   0   0   0   0   0   0   1

‑‑‑‑‑‑‑‑‑‑‑‑‑‑‑‑‑‑‑‑‑‑‑‑‑‑‑‑‑‑‑‑‑‑‑‑‑‑‑‑‑‑‑‑‑‑‑‑‑‑‑‑‑‑‑‑‑‑‑‑‑‑‑‑‑‑‑‑‑‑‑‑‑‑‑‑‑‑‑‑‑‑‑‑‑‑‑‑‑‑‑‑‑‑‑‑‑‑‑‑‑‑‑‑‑‑‑

Table

Incidence of Macroscopic Observations

All Animals

Test Article (dosage) 1M 2M 3M 4M 1F 2F 3F 4F

‑‑‑‑‑‑‑‑‑‑‑‑‑‑‑‑‑‑‑‑‑‑‑‑‑‑‑ ‑‑‑‑‑‑‑‑ ‑‑ ‑‑ ‑‑ ‑‑ ‑‑ ‑‑ ‑‑ ‑‑

Benzonatate (PF‑00345410) mg/kg/day 0 10 30 90 0 5 15 50

‑‑‑‑‑‑‑‑‑‑‑‑‑‑‑‑‑‑‑‑‑‑‑‑‑‑‑‑‑‑‑‑‑‑‑‑‑‑‑‑‑‑‑‑‑‑‑‑‑‑‑‑‑‑‑‑‑‑‑‑‑‑‑‑‑‑‑‑‑‑‑‑‑‑‑‑‑‑‑‑‑‑‑‑‑‑‑‑‑‑‑‑‑‑‑‑‑‑‑‑‑‑‑‑‑‑‑‑

Tissue/ Group/Subgroup/Sex: 1/1/M 2/1/M 3/1/M 4/1/M 1/1/F 2/1/F 3/1/F 4/1/F

Observation Number of Animals:  55  50  50  55  55  50  50  55

‑‑‑‑‑‑‑‑‑‑‑‑‑‑‑‑‑‑‑‑‑‑‑‑‑‑‑‑‑‑‑‑‑‑‑‑‑‑‑‑‑‑‑‑‑‑‑‑‑‑‑‑‑‑‑‑‑‑‑‑‑‑‑‑‑‑‑‑‑‑‑‑‑‑‑‑‑‑‑‑‑‑‑‑‑‑‑‑‑‑‑‑‑‑‑‑‑‑‑‑‑‑‑‑‑‑‑‑

Unremarkable:   5   6   6  12   4   3   8   4

Vagina Number Examined:   0   0   0   0  55  50  50  55

Unremarkable:   0   0   0   0  54  48  48  53

Abnormal contents   0   0   0   0   0   0   0   1

Large   0   0   0   0   0   0   0   1

Mass   0   0   0   0   1   1   1   1

Prolapsed   0   0   0   0   0   1   1   0

‑‑‑‑‑‑‑‑‑‑‑‑‑‑‑‑‑‑‑‑‑‑‑‑‑‑‑‑‑‑‑‑‑‑‑‑‑‑‑‑‑‑‑‑‑‑‑‑‑‑‑‑‑‑‑‑‑‑‑‑‑‑‑‑‑‑‑‑‑‑‑‑‑‑‑‑‑‑‑‑‑‑‑‑‑‑‑‑‑‑‑‑‑‑‑‑‑‑‑‑‑‑‑‑‑‑‑

Table 5.4: Incidence of Microscopic Observations - Terminal Euthanasia (Dosing Phase)

Test Article (dosage) 1M 2M 3M 4M 1F 2F 3F 4F

‑‑‑‑‑‑‑‑‑‑‑‑‑‑‑‑‑‑‑‑‑‑‑‑‑‑‑ ‑‑‑‑‑‑‑‑ ‑‑ ‑‑ ‑‑ ‑‑ ‑‑ ‑‑ ‑‑ ‑‑

Benzonatate (PF‑00345410) mg/kg/day 0 10 30 90 0 5 15 50

‑‑‑‑‑‑‑‑‑‑‑‑‑‑‑‑‑‑‑‑‑‑‑‑‑‑‑‑‑‑‑‑‑‑‑‑‑‑‑‑‑‑‑‑‑‑‑‑‑‑‑‑‑‑‑‑‑‑‑‑‑‑‑‑‑‑‑‑‑‑‑‑‑‑‑‑‑‑‑‑‑‑‑‑‑‑‑‑‑‑‑‑‑‑‑‑‑‑‑‑‑‑‑‑‑‑‑‑

Tissue/ Group/Subgroup/Sex: 1/1/M 2/1/M 3/1/M 4/1/M 1/1/F 2/1/F 3/1/F 4/1/F

Observation Number of Animals:  33  24  31  28  25  23  24  30

‑‑‑‑‑‑‑‑‑‑‑‑‑‑‑‑‑‑‑‑‑‑‑‑‑‑‑‑‑‑‑‑‑‑‑‑‑‑‑‑‑‑‑‑‑‑‑‑‑‑‑‑‑‑‑‑‑‑‑‑‑‑‑‑‑‑‑‑‑‑‑‑‑‑‑‑‑‑‑‑‑‑‑‑‑‑‑‑‑‑‑‑‑‑‑‑‑‑‑‑‑‑‑‑‑‑‑‑

Abdominal Cavity Number Examined:   0   0   0   1   0   0   0   0

Unremarkable:   0   0   0   0   0   0   0   0

Necrosis, fat   0   0   0   1   0   0   0   0

Adipose, Other Number Examined:   0   0   0   0   4   0   0   1

Unremarkable:   0   0   0   0   0   0   0   0

C‑Vascular neoplasm, see body,

whole for type 0 0 0 0 1 0 0 0

Inflammation, chronic‑active   0   0   0   0   0   0   0   1

Necrosis   0   0   0   0   3   0   0   1

Adipose, White,

Kidney Fat Pad Number Examined: 0 0 1 0 0 0 0 0

Unremarkable: 0 0 0 0 0 0 0 0

Hemorrhage   0   0   1   0   0   0   0   0

Inflammation, chronic‑active   0   0   1   0   0   0   0   0

‑‑‑‑‑‑‑‑‑‑‑‑‑‑‑‑‑‑‑‑‑‑‑‑‑‑‑‑‑‑‑‑‑‑‑‑‑‑‑‑‑‑‑‑‑‑‑‑‑‑‑‑‑‑‑‑‑‑‑‑‑‑‑‑‑‑‑‑‑‑‑‑‑‑‑‑‑‑‑‑‑‑‑‑‑‑‑‑‑‑‑‑‑‑‑‑‑‑‑‑‑‑‑‑‑‑‑

Table

Incidence of Microscopic Observations

Terminal Euthanasia (Dosing Phase)

Test Article (dosage) 1M 2M 3M 4M 1F 2F 3F 4F

‑‑‑‑‑‑‑‑‑‑‑‑‑‑‑‑‑‑‑‑‑‑‑‑‑‑‑ ‑‑‑‑‑‑‑‑ ‑‑ ‑‑ ‑‑ ‑‑ ‑‑ ‑‑ ‑‑ ‑‑

Benzonatate (PF‑00345410) mg/kg/day 0 10 30 90 0 5 15 50

‑‑‑‑‑‑‑‑‑‑‑‑‑‑‑‑‑‑‑‑‑‑‑‑‑‑‑‑‑‑‑‑‑‑‑‑‑‑‑‑‑‑‑‑‑‑‑‑‑‑‑‑‑‑‑‑‑‑‑‑‑‑‑‑‑‑‑‑‑‑‑‑‑‑‑‑‑‑‑‑‑‑‑‑‑‑‑‑‑‑‑‑‑‑‑‑‑‑‑‑‑‑‑‑‑‑‑‑

Tissue/ Group/Subgroup/Sex: 1/1/M 2/1/M 3/1/M 4/1/M 1/1/F 2/1/F 3/1/F 4/1/F

Observation Number of Animals:  33  24  31  28  25  23  24  30

‑‑‑‑‑‑‑‑‑‑‑‑‑‑‑‑‑‑‑‑‑‑‑‑‑‑‑‑‑‑‑‑‑‑‑‑‑‑‑‑‑‑‑‑‑‑‑‑‑‑‑‑‑‑‑‑‑‑‑‑‑‑‑‑‑‑‑‑‑‑‑‑‑‑‑‑‑‑‑‑‑‑‑‑‑‑‑‑‑‑‑‑‑‑‑‑‑‑‑‑‑‑‑‑‑‑‑‑

Adrenal, Cortex Number Examined:  33  24  31  28  25  23  24  30

Unremarkable:   2   1   1   1   0   0   0   0

Atrophy   0   0   0   0   1   0   0   1

B‑Adenoma   4   2   2   0   1   1   1   2

C‑Hematopoietic neoplasm, see

body, whole for type 0 0 0 0 0 0 0 1

Degeneration, cystic/hemorrhagic  28  22  29  27  24  23  24  29

Hyperplasia   3   3   1   1   1   1   1   0

Hypertrophy   5   7   7   2   3   3   5   2

Inflammation, chronic‑active   0   0   0   0   0   0   1   0

M‑Carcinoma   0   1   0   2   1   1   0   1

Adrenal, Medulla Number Examined:  33  24  31  28  25  23  24  30

Unremarkable:  32  22  30  27  23  22  23  29

B‑Pheochromocytoma   1   0   1   0   2   0   0   0

Hyperplasia   0   1   0   1   0   0   1   0

Infiltrate, mononuclear cell   0   0   0   0   0   1   0   1

M‑Malignant pheochromocytoma   0   1   0   0   0   0   0   0

‑‑‑‑‑‑‑‑‑‑‑‑‑‑‑‑‑‑‑‑‑‑‑‑‑‑‑‑‑‑‑‑‑‑‑‑‑‑‑‑‑‑‑‑‑‑‑‑‑‑‑‑‑‑‑‑‑‑‑‑‑‑‑‑‑‑‑‑‑‑‑‑‑‑‑‑‑‑‑‑‑‑‑‑‑‑‑‑‑‑‑‑‑‑‑‑‑‑‑‑‑‑‑‑‑‑‑

Table

Incidence of Microscopic Observations

Terminal Euthanasia (Dosing Phase)

Test Article (dosage) 1M 2M 3M 4M 1F 2F 3F 4F

‑‑‑‑‑‑‑‑‑‑‑‑‑‑‑‑‑‑‑‑‑‑‑‑‑‑‑ ‑‑‑‑‑‑‑‑ ‑‑ ‑‑ ‑‑ ‑‑ ‑‑ ‑‑ ‑‑ ‑‑

Benzonatate (PF‑00345410) mg/kg/day 0 10 30 90 0 5 15 50

‑‑‑‑‑‑‑‑‑‑‑‑‑‑‑‑‑‑‑‑‑‑‑‑‑‑‑‑‑‑‑‑‑‑‑‑‑‑‑‑‑‑‑‑‑‑‑‑‑‑‑‑‑‑‑‑‑‑‑‑‑‑‑‑‑‑‑‑‑‑‑‑‑‑‑‑‑‑‑‑‑‑‑‑‑‑‑‑‑‑‑‑‑‑‑‑‑‑‑‑‑‑‑‑‑‑‑‑

Tissue/ Group/Subgroup/Sex: 1/1/M 2/1/M 3/1/M 4/1/M 1/1/F 2/1/F 3/1/F 4/1/F

Observation Number of Animals:  33  24  31  28  25  23  24  30

‑‑‑‑‑‑‑‑‑‑‑‑‑‑‑‑‑‑‑‑‑‑‑‑‑‑‑‑‑‑‑‑‑‑‑‑‑‑‑‑‑‑‑‑‑‑‑‑‑‑‑‑‑‑‑‑‑‑‑‑‑‑‑‑‑‑‑‑‑‑‑‑‑‑‑‑‑‑‑‑‑‑‑‑‑‑‑‑‑‑‑‑‑‑‑‑‑‑‑‑‑‑‑‑‑‑‑‑

Body, Whole/Cavity Number Examined:  33  24  31  28  25  23  24  30

Unremarkable:  26  17  25  23  22  23  20  27

B‑Angioma   0   0   0   0   0   0   1   0

B‑Hemangioma   1   1   2   1   1   0   1   1

M‑Hemangiosarcoma   5   4   3   1   2   0   2   1

M‑Leukemia, mononuclear cell   0   0   0   0   0   0   0   1

M‑Lymphosarcoma   1   1   1   2   0   0   0   0

M‑Mesothelioma   1   1   0   1   0   0   0   0

M‑Plasma cell tumor   0   0   0   0   1   0   0   0

Brain Number Examined:  33  24  31  28  25  23  24  30

Unremarkable:  27  22  30  24  16  11  14  17

B‑Granular cell tumor   0   0   0   1   1   0   0   0

Compression, ventral   6   2   0   3   9  12  10  13

M‑Malignant astrocytoma   0   0   1   0   0   0   0   0

N‑Carcinoma   0   0   0   0   1   0   0   0

Cecum Number Examined:  33  24  31  28  25  23  24  30

Unremarkable:  32  24  31  27  25  23  22  30

B‑Lipoma   0   0   0   1   0   0   0   0

Ectasia, crypt/gland   1   0   0   0   0   0   0   0

Hemorrhage   1   0   0   0   0   0   0   0

Inflammation   1   0   0   0   0   0   0   0

Inflammation, chronic,

vascular/perivascular 0 0 0 0 0 0 1 0

Parasite, nematode   0   0   0   0   0   0   1   0

‑‑‑‑‑‑‑‑‑‑‑‑‑‑‑‑‑‑‑‑‑‑‑‑‑‑‑‑‑‑‑‑‑‑‑‑‑‑‑‑‑‑‑‑‑‑‑‑‑‑‑‑‑‑‑‑‑‑‑‑‑‑‑‑‑‑‑‑‑‑‑‑‑‑‑‑‑‑‑‑‑‑‑‑‑‑‑‑‑‑‑‑‑‑‑‑‑‑‑‑‑‑‑‑‑‑‑

Table

Incidence of Microscopic Observations

Terminal Euthanasia (Dosing Phase)

Test Article (dosage) 1M 2M 3M 4M 1F 2F 3F 4F

‑‑‑‑‑‑‑‑‑‑‑‑‑‑‑‑‑‑‑‑‑‑‑‑‑‑‑ ‑‑‑‑‑‑‑‑ ‑‑ ‑‑ ‑‑ ‑‑ ‑‑ ‑‑ ‑‑ ‑‑

Benzonatate (PF‑00345410) mg/kg/day 0 10 30 90 0 5 15 50

‑‑‑‑‑‑‑‑‑‑‑‑‑‑‑‑‑‑‑‑‑‑‑‑‑‑‑‑‑‑‑‑‑‑‑‑‑‑‑‑‑‑‑‑‑‑‑‑‑‑‑‑‑‑‑‑‑‑‑‑‑‑‑‑‑‑‑‑‑‑‑‑‑‑‑‑‑‑‑‑‑‑‑‑‑‑‑‑‑‑‑‑‑‑‑‑‑‑‑‑‑‑‑‑‑‑‑‑

Tissue/ Group/Subgroup/Sex: 1/1/M 2/1/M 3/1/M 4/1/M 1/1/F 2/1/F 3/1/F 4/1/F

Observation Number of Animals:  33  24  31  28  25  23  24  30

‑‑‑‑‑‑‑‑‑‑‑‑‑‑‑‑‑‑‑‑‑‑‑‑‑‑‑‑‑‑‑‑‑‑‑‑‑‑‑‑‑‑‑‑‑‑‑‑‑‑‑‑‑‑‑‑‑‑‑‑‑‑‑‑‑‑‑‑‑‑‑‑‑‑‑‑‑‑‑‑‑‑‑‑‑‑‑‑‑‑‑‑‑‑‑‑‑‑‑‑‑‑‑‑‑‑‑‑

Cervix Number Examined:   0   0   0   0  25  23  24  30

Unremarkable:   0   0   0   0  20  18  19  25

B‑Polyp, stromal   0   0   0   0   0   1   0   0

Hyperplasia, epithelium   0   0   0   0   3   0   5   2

Hypertrophy, stroma   0   0   0   0   0   1   0   1

Inflammation, chronic‑active   0   0   0   0   0   1   0   1

Lumen, exudate/debris   0   0   0   0   1   3   0   1

M‑Carcinoma   0   0   0   0   1   0   0   0

Clitoral Gland Number Examined:   0   0   0   0   1   0   0   0

Unremarkable:   0   0   0   0   0   0   0   0

Inflammation/cyst   0   0   0   0   1   0   0   0

Colon Number Examined:  33  24  31  28  25  23  24  30

Unremarkable:  32  23  29  28  25  22  24  30

Parasite, nematode   1   1   2   0   0   1   0   0

Death Comment Number Examined:  33  24  31  28  25  23  24  30

Unremarkable:   0   0   0   0   0   0   0   0

Scheduled sacrifice  33  24  31  28  25  23  24  30

Duodenum Number Examined:  33  24  31  28  25  23  24  30

Unremarkable:  33  24  31  28  24  23  24  30

C‑Vascular neoplasm, see body,

whole for type 0 0 0 0 1 0 0 0

‑‑‑‑‑‑‑‑‑‑‑‑‑‑‑‑‑‑‑‑‑‑‑‑‑‑‑‑‑‑‑‑‑‑‑‑‑‑‑‑‑‑‑‑‑‑‑‑‑‑‑‑‑‑‑‑‑‑‑‑‑‑‑‑‑‑‑‑‑‑‑‑‑‑‑‑‑‑‑‑‑‑‑‑‑‑‑‑‑‑‑‑‑‑‑‑‑‑‑‑‑‑‑‑‑‑‑

Table

Incidence of Microscopic Observations

Terminal Euthanasia (Dosing Phase)

Test Article (dosage) 1M 2M 3M 4M 1F 2F 3F 4F

‑‑‑‑‑‑‑‑‑‑‑‑‑‑‑‑‑‑‑‑‑‑‑‑‑‑‑ ‑‑‑‑‑‑‑‑ ‑‑ ‑‑ ‑‑ ‑‑ ‑‑ ‑‑ ‑‑ ‑‑

Benzonatate (PF‑00345410) mg/kg/day 0 10 30 90 0 5 15 50

‑‑‑‑‑‑‑‑‑‑‑‑‑‑‑‑‑‑‑‑‑‑‑‑‑‑‑‑‑‑‑‑‑‑‑‑‑‑‑‑‑‑‑‑‑‑‑‑‑‑‑‑‑‑‑‑‑‑‑‑‑‑‑‑‑‑‑‑‑‑‑‑‑‑‑‑‑‑‑‑‑‑‑‑‑‑‑‑‑‑‑‑‑‑‑‑‑‑‑‑‑‑‑‑‑‑‑‑

Tissue/ Group/Subgroup/Sex: 1/1/M 2/1/M 3/1/M 4/1/M 1/1/F 2/1/F 3/1/F 4/1/F

Observation Number of Animals:  33  24  31  28  25  23  24  30

‑‑‑‑‑‑‑‑‑‑‑‑‑‑‑‑‑‑‑‑‑‑‑‑‑‑‑‑‑‑‑‑‑‑‑‑‑‑‑‑‑‑‑‑‑‑‑‑‑‑‑‑‑‑‑‑‑‑‑‑‑‑‑‑‑‑‑‑‑‑‑‑‑‑‑‑‑‑‑‑‑‑‑‑‑‑‑‑‑‑‑‑‑‑‑‑‑‑‑‑‑‑‑‑‑‑‑‑

Epididymis Number Examined:  33  24  31  28   0   0   0   0

Unremarkable:  27  22  26  25   0   0   0   0

C‑Mesothelioma, see body, whole   1   1   0   1   0   0   0   0

Granuloma, sperm   1   0   1   0   0   0   0   0

Hypospermia   4   1   2   2   0   0   0   0

Infiltrate, mononuclear cell   1   0   2   0   0   0   0   0

Esophagus Number Examined:  33  24  31  28  25  23  24  30

Unremarkable:  31  24  30  27  24  23  24  30

Degeneration/regeneration,

muscularis 2 0 1 1 1 0 0 0

Eye Number Examined:  32  24  31  28  25  23  24  30

Unremarkable:  24  20  21  19  19  19  20  20

Atrophy, retina   7   4  10   9   6   4   4  10

B‑Schwannoma   1   0   0   0   0   0   0   0

Cataract   0   0   1   1   0   0   0   0

Inflammation, chronic‑active   0   0   0   1   0   0   0   0

Rosette, retina   1   0   0   0   0   0   0   0

Foot/Footpad Number Examined:   8   3   5   2   0   2   3   2

Unremarkable:   0   1   0   0   0   0   0   0

Inflammation/hyperplasia   8   2   5   2   0   2   3   2

Ulcer   4   0   3   0   0   0   0   2

‑‑‑‑‑‑‑‑‑‑‑‑‑‑‑‑‑‑‑‑‑‑‑‑‑‑‑‑‑‑‑‑‑‑‑‑‑‑‑‑‑‑‑‑‑‑‑‑‑‑‑‑‑‑‑‑‑‑‑‑‑‑‑‑‑‑‑‑‑‑‑‑‑‑‑‑‑‑‑‑‑‑‑‑‑‑‑‑‑‑‑‑‑‑‑‑‑‑‑‑‑‑‑‑‑‑‑

Table

Incidence of Microscopic Observations

Terminal Euthanasia (Dosing Phase)

Test Article (dosage) 1M 2M 3M 4M 1F 2F 3F 4F

‑‑‑‑‑‑‑‑‑‑‑‑‑‑‑‑‑‑‑‑‑‑‑‑‑‑‑ ‑‑‑‑‑‑‑‑ ‑‑ ‑‑ ‑‑ ‑‑ ‑‑ ‑‑ ‑‑ ‑‑

Benzonatate (PF‑00345410) mg/kg/day 0 10 30 90 0 5 15 50

‑‑‑‑‑‑‑‑‑‑‑‑‑‑‑‑‑‑‑‑‑‑‑‑‑‑‑‑‑‑‑‑‑‑‑‑‑‑‑‑‑‑‑‑‑‑‑‑‑‑‑‑‑‑‑‑‑‑‑‑‑‑‑‑‑‑‑‑‑‑‑‑‑‑‑‑‑‑‑‑‑‑‑‑‑‑‑‑‑‑‑‑‑‑‑‑‑‑‑‑‑‑‑‑‑‑‑‑

Tissue/ Group/Subgroup/Sex: 1/1/M 2/1/M 3/1/M 4/1/M 1/1/F 2/1/F 3/1/F 4/1/F

Observation Number of Animals:  33  24  31  28  25  23  24  30

‑‑‑‑‑‑‑‑‑‑‑‑‑‑‑‑‑‑‑‑‑‑‑‑‑‑‑‑‑‑‑‑‑‑‑‑‑‑‑‑‑‑‑‑‑‑‑‑‑‑‑‑‑‑‑‑‑‑‑‑‑‑‑‑‑‑‑‑‑‑‑‑‑‑‑‑‑‑‑‑‑‑‑‑‑‑‑‑‑‑‑‑‑‑‑‑‑‑‑‑‑‑‑‑‑‑‑‑

Harderian Gland Number Examined:  32  24  31  28  25  23  24  30

Unremarkable:  10  12  19  12  17  15  16  17

Degeneration   1   0   0   0   0   0   0   0

Hyperplasia   5   2   2   3   2   1   0   1

Infiltrate, mononuclear cell  18  11  12  15   8   7   8  10

Inflammation, chronic‑active   0   0   0   1   0   0   0   0

Inflammation, granulomatous   0   1   0   1   0   1   1   3

Heart Number Examined:  33  24  31  28  25  23  24  30

Unremarkable:   2   2   0   0   6   7   5   3

B‑Endocardial schwannoma   0   0   0   0   0   0   0   1

Cardiomyopathy, degenerative  31  22  30  28  19  16  19  27

Hyperplasia, endocardium   0   0   0   0   0   0   0   1

Inflammation, vessel   0   0   1   0   0   0   0   0

M‑Endocardial schwannoma   0   0   0   0   0   0   0   1

Ileum Number Examined:  33  24  31  28  25  23  24  30

Unremarkable:  33  24  31  27  25  23  24  30

Inflammation, chronic‑active   0   0   0   1   0   0   0   0

Jejunum Number Examined:  33  24  31  28  25  23  24  30

Unremarkable:  33  24  31  27  25  23  24  30

N‑Carcinoma   0   0   0   1   0   0   0   0

‑‑‑‑‑‑‑‑‑‑‑‑‑‑‑‑‑‑‑‑‑‑‑‑‑‑‑‑‑‑‑‑‑‑‑‑‑‑‑‑‑‑‑‑‑‑‑‑‑‑‑‑‑‑‑‑‑‑‑‑‑‑‑‑‑‑‑‑‑‑‑‑‑‑‑‑‑‑‑‑‑‑‑‑‑‑‑‑‑‑‑‑‑‑‑‑‑‑‑‑‑‑‑‑‑‑‑

Table

Incidence of Microscopic Observations

Terminal Euthanasia (Dosing Phase)

Test Article (dosage) 1M 2M 3M 4M 1F 2F 3F 4F

‑‑‑‑‑‑‑‑‑‑‑‑‑‑‑‑‑‑‑‑‑‑‑‑‑‑‑ ‑‑‑‑‑‑‑‑ ‑‑ ‑‑ ‑‑ ‑‑ ‑‑ ‑‑ ‑‑ ‑‑

Benzonatate (PF‑00345410) mg/kg/day 0 10 30 90 0 5 15 50

‑‑‑‑‑‑‑‑‑‑‑‑‑‑‑‑‑‑‑‑‑‑‑‑‑‑‑‑‑‑‑‑‑‑‑‑‑‑‑‑‑‑‑‑‑‑‑‑‑‑‑‑‑‑‑‑‑‑‑‑‑‑‑‑‑‑‑‑‑‑‑‑‑‑‑‑‑‑‑‑‑‑‑‑‑‑‑‑‑‑‑‑‑‑‑‑‑‑‑‑‑‑‑‑‑‑‑‑

Tissue/ Group/Subgroup/Sex: 1/1/M 2/1/M 3/1/M 4/1/M 1/1/F 2/1/F 3/1/F 4/1/F

Observation Number of Animals:  33  24  31  28  25  23  24  30

‑‑‑‑‑‑‑‑‑‑‑‑‑‑‑‑‑‑‑‑‑‑‑‑‑‑‑‑‑‑‑‑‑‑‑‑‑‑‑‑‑‑‑‑‑‑‑‑‑‑‑‑‑‑‑‑‑‑‑‑‑‑‑‑‑‑‑‑‑‑‑‑‑‑‑‑‑‑‑‑‑‑‑‑‑‑‑‑‑‑‑‑‑‑‑‑‑‑‑‑‑‑‑‑‑‑‑‑

Kidney Number Examined:  33  24  31  28  25  23  24  30

Unremarkable:   3   2   3   1   6   4   4   5

B‑Infiltrating lipoma   0   0   0   0   0   1   0   0

Cyst   1   0   3   1   1   1   0   0

Dilatation, pelvis   0   2   2   1   1   2   1   3

Dilatation, tubule(s)   0   0   0   0   0   1   0   0

Hemorrhage/hematoma   1   0   0   0   0   0   0   0

Hyperplasia, transitional cell   3   0   1   2  16   8   4   9

Hyperplasia, tubule cell   0   1   0   0   0   0   0   0

Mineralization, pelvis   7   5   2   4  17  12  15  16

Nephropathy, chronic progressive  30  22  28  27   8  15  16  15

Pyelonephritis   6   0   1   0   1   0   0   0

Lacrimal Gland Number Examined:   2   0   1   5   0   0   0   0

Unremarkable:   1   0   0   0   0   0   0   0

Ectopic Harderian gland   1   0   1   5   0   0   0   0

‑‑‑‑‑‑‑‑‑‑‑‑‑‑‑‑‑‑‑‑‑‑‑‑‑‑‑‑‑‑‑‑‑‑‑‑‑‑‑‑‑‑‑‑‑‑‑‑‑‑‑‑‑‑‑‑‑‑‑‑‑‑‑‑‑‑‑‑‑‑‑‑‑‑‑‑‑‑‑‑‑‑‑‑‑‑‑‑‑‑‑‑‑‑‑‑‑‑‑‑‑‑‑‑‑‑‑

Table

Incidence of Microscopic Observations

Terminal Euthanasia (Dosing Phase)

Test Article (dosage) 1M 2M 3M 4M 1F 2F 3F 4F

‑‑‑‑‑‑‑‑‑‑‑‑‑‑‑‑‑‑‑‑‑‑‑‑‑‑‑ ‑‑‑‑‑‑‑‑ ‑‑ ‑‑ ‑‑ ‑‑ ‑‑ ‑‑ ‑‑ ‑‑

Benzonatate (PF‑00345410) mg/kg/day 0 10 30 90 0 5 15 50

‑‑‑‑‑‑‑‑‑‑‑‑‑‑‑‑‑‑‑‑‑‑‑‑‑‑‑‑‑‑‑‑‑‑‑‑‑‑‑‑‑‑‑‑‑‑‑‑‑‑‑‑‑‑‑‑‑‑‑‑‑‑‑‑‑‑‑‑‑‑‑‑‑‑‑‑‑‑‑‑‑‑‑‑‑‑‑‑‑‑‑‑‑‑‑‑‑‑‑‑‑‑‑‑‑‑‑‑

Tissue/ Group/Subgroup/Sex: 1/1/M 2/1/M 3/1/M 4/1/M 1/1/F 2/1/F 3/1/F 4/1/F

Observation Number of Animals:  33  24  31  28  25  23  24  30

‑‑‑‑‑‑‑‑‑‑‑‑‑‑‑‑‑‑‑‑‑‑‑‑‑‑‑‑‑‑‑‑‑‑‑‑‑‑‑‑‑‑‑‑‑‑‑‑‑‑‑‑‑‑‑‑‑‑‑‑‑‑‑‑‑‑‑‑‑‑‑‑‑‑‑‑‑‑‑‑‑‑‑‑‑‑‑‑‑‑‑‑‑‑‑‑‑‑‑‑‑‑‑‑‑‑‑‑

Liver Number Examined:  33  24  31  28  25  23  24  30

Unremarkable:   1   1   1   1   0   0   0   1

Angiectasis   5   5   2   3   3   5   2   4

B‑Adenoma, hepatocellular   2   0   1   0   2   0   0   2

Barbiturate lysis   0   0   0   1   0   0   0   1

C‑Hematopoietic neoplasm, see

body, whole for type 0 0 0 0 0 0 0 1

Cyst, biliary   0   0   0   0   0   0   1   0

Degeneration, cystic   5   0   0   3   2   0   0   0

Fibrosis/biliary hyperplasia   7   6   9   9  17  13  12  15

Focus, cellular alteration,

basophilic 23 16 27 21 22 23 20 24

Focus, cellular alteration, clear   0   0   0   0   1   0   0   0

Focus, cellular alteration,

eosinophilic 12 12 14 10 6 4 6 8

Hematopoiesis, extramedullary   0   2   0   0   0   1   0   1

Hyperplasia, Kupffer cell   0   1   0   0   0   0   0   0

Infiltrate, mononuclear cell  19  11  15  16  17  13  11  15

Lipidosis, tension   0   0   0   1   0   0   0   0

M‑Carcinoma, hepatocellular   0   0   0   0   1   0   0   0

Mitosis, hepatocyte, increased   0   0   0   0   0   1   0   0

Multinucleated hepatocyte,

increased 0 0 0 0 3 0 1 4

N‑Carcinoma   0   0   0   0   0   0   0   1

Necrosis, hepatocyte   0   0   0   2   1   0   0   1

N‑Sarcoma   0   1   0   0   0   0   0   0

‑‑‑‑‑‑‑‑‑‑‑‑‑‑‑‑‑‑‑‑‑‑‑‑‑‑‑‑‑‑‑‑‑‑‑‑‑‑‑‑‑‑‑‑‑‑‑‑‑‑‑‑‑‑‑‑‑‑‑‑‑‑‑‑‑‑‑‑‑‑‑‑‑‑‑‑‑‑‑‑‑‑‑‑‑‑‑‑‑‑‑‑‑‑‑‑‑‑‑‑‑‑‑‑‑‑‑

Table

Incidence of Microscopic Observations

Terminal Euthanasia (Dosing Phase)

Test Article (dosage) 1M 2M 3M 4M 1F 2F 3F 4F

‑‑‑‑‑‑‑‑‑‑‑‑‑‑‑‑‑‑‑‑‑‑‑‑‑‑‑ ‑‑‑‑‑‑‑‑ ‑‑ ‑‑ ‑‑ ‑‑ ‑‑ ‑‑ ‑‑ ‑‑

Benzonatate (PF‑00345410) mg/kg/day 0 10 30 90 0 5 15 50

‑‑‑‑‑‑‑‑‑‑‑‑‑‑‑‑‑‑‑‑‑‑‑‑‑‑‑‑‑‑‑‑‑‑‑‑‑‑‑‑‑‑‑‑‑‑‑‑‑‑‑‑‑‑‑‑‑‑‑‑‑‑‑‑‑‑‑‑‑‑‑‑‑‑‑‑‑‑‑‑‑‑‑‑‑‑‑‑‑‑‑‑‑‑‑‑‑‑‑‑‑‑‑‑‑‑‑‑

Tissue/ Group/Subgroup/Sex: 1/1/M 2/1/M 3/1/M 4/1/M 1/1/F 2/1/F 3/1/F 4/1/F

Observation Number of Animals:  33  24  31  28  25  23  24  30

‑‑‑‑‑‑‑‑‑‑‑‑‑‑‑‑‑‑‑‑‑‑‑‑‑‑‑‑‑‑‑‑‑‑‑‑‑‑‑‑‑‑‑‑‑‑‑‑‑‑‑‑‑‑‑‑‑‑‑‑‑‑‑‑‑‑‑‑‑‑‑‑‑‑‑‑‑‑‑‑‑‑‑‑‑‑‑‑‑‑‑‑‑‑‑‑‑‑‑‑‑‑‑‑‑‑‑‑

Liver Number Examined:  33  24  31  28  25  23  24  30

Unremarkable:   1   1   1   1   0   0   0   1

Pigment, increased   0   0   0   0   1   0   0   0

Vacuolation, increased, hepatocyte   4  11  10   3   5   3   2   4

Lung Number Examined:  33  24  31  28  25  23  24  30

Unremarkable:  23  15  19  22  16  15  19  22

C‑Hematopoietic neoplasm, see

body, whole for type 0 0 0 0 0 0 0 1

C‑Vascular neoplasm, see body,

whole for type 0 1 0 0 0 0 0 0

Granuloma   3   1   1   0   0   2   0   1

Hyperplasia, epithelium, alveolus   0   1   1   0   0   0   0   0

Infiltrate, macrophages, alveolus   0   0   0   0   0   0   1   0

Infiltrate, macrophages,

vacuolated 9 7 10 6 8 6 4 7

Inflammation, mixed cell   1   1   2   1   3   3   1   1

N‑Carcinoma   0   0   0   0   1   0   0   0

Pigment   0   0   1   0   0   0   1   0

‑‑‑‑‑‑‑‑‑‑‑‑‑‑‑‑‑‑‑‑‑‑‑‑‑‑‑‑‑‑‑‑‑‑‑‑‑‑‑‑‑‑‑‑‑‑‑‑‑‑‑‑‑‑‑‑‑‑‑‑‑‑‑‑‑‑‑‑‑‑‑‑‑‑‑‑‑‑‑‑‑‑‑‑‑‑‑‑‑‑‑‑‑‑‑‑‑‑‑‑‑‑‑‑‑‑‑

Table

Incidence of Microscopic Observations

Terminal Euthanasia (Dosing Phase)

Test Article (dosage) 1M 2M 3M 4M 1F 2F 3F 4F

‑‑‑‑‑‑‑‑‑‑‑‑‑‑‑‑‑‑‑‑‑‑‑‑‑‑‑ ‑‑‑‑‑‑‑‑ ‑‑ ‑‑ ‑‑ ‑‑ ‑‑ ‑‑ ‑‑ ‑‑

Benzonatate (PF‑00345410) mg/kg/day 0 10 30 90 0 5 15 50

‑‑‑‑‑‑‑‑‑‑‑‑‑‑‑‑‑‑‑‑‑‑‑‑‑‑‑‑‑‑‑‑‑‑‑‑‑‑‑‑‑‑‑‑‑‑‑‑‑‑‑‑‑‑‑‑‑‑‑‑‑‑‑‑‑‑‑‑‑‑‑‑‑‑‑‑‑‑‑‑‑‑‑‑‑‑‑‑‑‑‑‑‑‑‑‑‑‑‑‑‑‑‑‑‑‑‑‑

Tissue/ Group/Subgroup/Sex: 1/1/M 2/1/M 3/1/M 4/1/M 1/1/F 2/1/F 3/1/F 4/1/F

Observation Number of Animals:  33  24  31  28  25  23  24  30

‑‑‑‑‑‑‑‑‑‑‑‑‑‑‑‑‑‑‑‑‑‑‑‑‑‑‑‑‑‑‑‑‑‑‑‑‑‑‑‑‑‑‑‑‑‑‑‑‑‑‑‑‑‑‑‑‑‑‑‑‑‑‑‑‑‑‑‑‑‑‑‑‑‑‑‑‑‑‑‑‑‑‑‑‑‑‑‑‑‑‑‑‑‑‑‑‑‑‑‑‑‑‑‑‑‑‑‑

Lymph Node,

Inguinal Number Examined: 29 20 29 26 23 19 18 24

Unremarkable: 27 20 29 25 22 19 18 24

Dilatation, sinus   0   0   0   1   0   0   0   0

Hyperplasia, lymphocytes   2   0   0   1   0   0   0   0

N‑Carcinoma   0   0   0   0   1   0   0   0

Lymph Node,

Mesenteric Number Examined: 33 24 31 28 25 23 24 30

Unremarkable: 26 21 23 23 22 21 18 26

Angiectasis   0   0   1   1   0   0   0   0

C‑Hematopoietic neoplasm, see

body, whole for type 0 0 0 0 0 0 0 1

C‑Vascular neoplasm, see body,

whole for type 5 2 5 2 2 0 3 2

Erythrocytes, sinus, increased   3   1   2   3   1   1   5   1

Inflammation   0   0   0   0   0   1   0   0

Lymph Node, Other Number Examined:   1   1   1   0   0   0   0   0

Unremarkable:   0   0   0   0   0   0   0   0

Dilatation, sinus   1   0   0   0   0   0   0   0

Hyperplasia, lymphocytes   0   0   1   0   0   0   0   0

N‑Sarcoma   0   1   0   0   0   0   0   0

‑‑‑‑‑‑‑‑‑‑‑‑‑‑‑‑‑‑‑‑‑‑‑‑‑‑‑‑‑‑‑‑‑‑‑‑‑‑‑‑‑‑‑‑‑‑‑‑‑‑‑‑‑‑‑‑‑‑‑‑‑‑‑‑‑‑‑‑‑‑‑‑‑‑‑‑‑‑‑‑‑‑‑‑‑‑‑‑‑‑‑‑‑‑‑‑‑‑‑‑‑‑‑‑‑‑‑

Table

Incidence of Microscopic Observations

Terminal Euthanasia (Dosing Phase)

Test Article (dosage) 1M 2M 3M 4M 1F 2F 3F 4F

‑‑‑‑‑‑‑‑‑‑‑‑‑‑‑‑‑‑‑‑‑‑‑‑‑‑‑ ‑‑‑‑‑‑‑‑ ‑‑ ‑‑ ‑‑ ‑‑ ‑‑ ‑‑ ‑‑ ‑‑

Benzonatate (PF‑00345410) mg/kg/day 0 10 30 90 0 5 15 50

‑‑‑‑‑‑‑‑‑‑‑‑‑‑‑‑‑‑‑‑‑‑‑‑‑‑‑‑‑‑‑‑‑‑‑‑‑‑‑‑‑‑‑‑‑‑‑‑‑‑‑‑‑‑‑‑‑‑‑‑‑‑‑‑‑‑‑‑‑‑‑‑‑‑‑‑‑‑‑‑‑‑‑‑‑‑‑‑‑‑‑‑‑‑‑‑‑‑‑‑‑‑‑‑‑‑‑‑

Tissue/ Group/Subgroup/Sex: 1/1/M 2/1/M 3/1/M 4/1/M 1/1/F 2/1/F 3/1/F 4/1/F

Observation Number of Animals:  33  24  31  28  25  23  24  30

‑‑‑‑‑‑‑‑‑‑‑‑‑‑‑‑‑‑‑‑‑‑‑‑‑‑‑‑‑‑‑‑‑‑‑‑‑‑‑‑‑‑‑‑‑‑‑‑‑‑‑‑‑‑‑‑‑‑‑‑‑‑‑‑‑‑‑‑‑‑‑‑‑‑‑‑‑‑‑‑‑‑‑‑‑‑‑‑‑‑‑‑‑‑‑‑‑‑‑‑‑‑‑‑‑‑‑‑

Mammary Gland Number Examined:  30  17  23  19  25  23  23  30

Unremarkable:  24  17  21  15   5   3   8   3

B‑Adenoma   0   0   0   0   0   0   2   0

B‑Fibroadenoma   0   0   0   0   3   6   3   4

Cyst/ectasia with inflammation   6   0   2   4  15  18  11  21

Hyperplasia   0   0   0   0  16  17  11  18

M‑Carcinoma   0   0   0   0   3   3   2   4

Mandibular

Salivary Gland Number Examined: 33 24 31 28 25 23 24 30

Unremarkable: 33 24 31 28 25 22 24 30

M‑Sarcoma   0   0   0   0   0   1   0   0

Marrow, Sternum Number Examined:  33  24  31  28  25  23  24  30

Unremarkable:  28  23  31  28  25  23  24  28

C‑Hematopoietic neoplasm, see

body, whole for type 0 0 0 0 0 0 0 1

Hyperplasia, myeloid   5   1   0   0   0   0   0   1

Mesentery Number Examined:   0   0   0   0   1   0   0   1

Unremarkable:   0   0   0   0   0   0   0   0

Inflammation   0   0   0   0   1   0   0   0

N‑Carcinoma   0   0   0   0   0   0   0   1

Necrosis   0   0   0   0   1   0   0   0

‑‑‑‑‑‑‑‑‑‑‑‑‑‑‑‑‑‑‑‑‑‑‑‑‑‑‑‑‑‑‑‑‑‑‑‑‑‑‑‑‑‑‑‑‑‑‑‑‑‑‑‑‑‑‑‑‑‑‑‑‑‑‑‑‑‑‑‑‑‑‑‑‑‑‑‑‑‑‑‑‑‑‑‑‑‑‑‑‑‑‑‑‑‑‑‑‑‑‑‑‑‑‑‑‑‑‑

Table

Incidence of Microscopic Observations

Terminal Euthanasia (Dosing Phase)

Test Article (dosage) 1M 2M 3M 4M 1F 2F 3F 4F

‑‑‑‑‑‑‑‑‑‑‑‑‑‑‑‑‑‑‑‑‑‑‑‑‑‑‑ ‑‑‑‑‑‑‑‑ ‑‑ ‑‑ ‑‑ ‑‑ ‑‑ ‑‑ ‑‑ ‑‑

Benzonatate (PF‑00345410) mg/kg/day 0 10 30 90 0 5 15 50

‑‑‑‑‑‑‑‑‑‑‑‑‑‑‑‑‑‑‑‑‑‑‑‑‑‑‑‑‑‑‑‑‑‑‑‑‑‑‑‑‑‑‑‑‑‑‑‑‑‑‑‑‑‑‑‑‑‑‑‑‑‑‑‑‑‑‑‑‑‑‑‑‑‑‑‑‑‑‑‑‑‑‑‑‑‑‑‑‑‑‑‑‑‑‑‑‑‑‑‑‑‑‑‑‑‑‑‑

Tissue/ Group/Subgroup/Sex: 1/1/M 2/1/M 3/1/M 4/1/M 1/1/F 2/1/F 3/1/F 4/1/F

Observation Number of Animals:  33  24  31  28  25  23  24  30

‑‑‑‑‑‑‑‑‑‑‑‑‑‑‑‑‑‑‑‑‑‑‑‑‑‑‑‑‑‑‑‑‑‑‑‑‑‑‑‑‑‑‑‑‑‑‑‑‑‑‑‑‑‑‑‑‑‑‑‑‑‑‑‑‑‑‑‑‑‑‑‑‑‑‑‑‑‑‑‑‑‑‑‑‑‑‑‑‑‑‑‑‑‑‑‑‑‑‑‑‑‑‑‑‑‑‑‑

Muscle, Biceps

Femoris Number Examined: 33 24 31 28 25 23 24 30

Unremarkable: 16 5 2 6 7 15 20 11

Degeneration/regeneration  17  19  29  22  18   8   4  19

Nerve, Optic Number Examined:  33  24  31  28  25  23  24  30

Unremarkable:  33  24  31  27  24  23  23  30

Atrophy   0   0   0   0   1   0   1   0

Degeneration, axon   0   0   0   1   0   0   0   0

Nerve, Sciatic Number Examined:  33  24  31  28  25  23  24  30

Unremarkable:  33  24  30  28  14  22  20  23

Degeneration, axon, increased   0   0   1   0  11   1   4   7

Ovary Number Examined:   0   0   0   0  25  23  24  29

Unremarkable:   0   0   0   0  13   8   7  12

B‑Granulosa/theca cell tumor   0   0   0   0   2   1   1   3

C‑Vascular neoplasm, see body,

whole for type 0 0 0 0 0 0 1 0

Cyst, bursa   0   0   0   0   1   1   1   3

Cyst, corpus luteum   0   0   0   0   0   0   1   1

Cyst, follicle   0   0   0   0   0   1   5   0

Cyst, parovarian   0   0   0   0   6   3   2   6

Hyperplasia, interstitial cell   0   0   0   0   7  12  11   7

‑‑‑‑‑‑‑‑‑‑‑‑‑‑‑‑‑‑‑‑‑‑‑‑‑‑‑‑‑‑‑‑‑‑‑‑‑‑‑‑‑‑‑‑‑‑‑‑‑‑‑‑‑‑‑‑‑‑‑‑‑‑‑‑‑‑‑‑‑‑‑‑‑‑‑‑‑‑‑‑‑‑‑‑‑‑‑‑‑‑‑‑‑‑‑‑‑‑‑‑‑‑‑‑‑‑‑

Table

Incidence of Microscopic Observations

Terminal Euthanasia (Dosing Phase)

Test Article (dosage) 1M 2M 3M 4M 1F 2F 3F 4F

‑‑‑‑‑‑‑‑‑‑‑‑‑‑‑‑‑‑‑‑‑‑‑‑‑‑‑ ‑‑‑‑‑‑‑‑ ‑‑ ‑‑ ‑‑ ‑‑ ‑‑ ‑‑ ‑‑ ‑‑

Benzonatate (PF‑00345410) mg/kg/day 0 10 30 90 0 5 15 50

‑‑‑‑‑‑‑‑‑‑‑‑‑‑‑‑‑‑‑‑‑‑‑‑‑‑‑‑‑‑‑‑‑‑‑‑‑‑‑‑‑‑‑‑‑‑‑‑‑‑‑‑‑‑‑‑‑‑‑‑‑‑‑‑‑‑‑‑‑‑‑‑‑‑‑‑‑‑‑‑‑‑‑‑‑‑‑‑‑‑‑‑‑‑‑‑‑‑‑‑‑‑‑‑‑‑‑‑

Tissue/ Group/Subgroup/Sex: 1/1/M 2/1/M 3/1/M 4/1/M 1/1/F 2/1/F 3/1/F 4/1/F

Observation Number of Animals:  33  24  31  28  25  23  24  30

‑‑‑‑‑‑‑‑‑‑‑‑‑‑‑‑‑‑‑‑‑‑‑‑‑‑‑‑‑‑‑‑‑‑‑‑‑‑‑‑‑‑‑‑‑‑‑‑‑‑‑‑‑‑‑‑‑‑‑‑‑‑‑‑‑‑‑‑‑‑‑‑‑‑‑‑‑‑‑‑‑‑‑‑‑‑‑‑‑‑‑‑‑‑‑‑‑‑‑‑‑‑‑‑‑‑‑‑

Pancreas Number Examined:  33  24  31  28  25  23  24  30

Unremarkable:   5   5   3   0  13  14  20  15

Alteration, basophilic   1   2   0   5   1   0   0   1

Atrophy, acinar   2   4   4   6   2   3   0   3

B‑Adenoma, islet cell   1   0   0   0   2   0   1   0

Depletion, zymogen   0   0   2   0   0   0   0   1

Ectopic spleen   0   0   0   0   0   0   0   1

Hyperplasia, islet cell  26  19  26  27   8   8   0   9

Infiltrate, mononuclear cell   1   5  10   4   2   1   2   5

Inflammation, acute   0   0   0   1   0   0   0   0

Inflammation, chronic   4   0   3   2   1   0   0   0

Inflammation, vessel   0   0   1   0   0   0   1   0

M‑Carcinoma, acinar Cell   0   0   0   0   0   1   0   0

M‑Carcinoma, islet cell   1   0   0   0   0   0   0   1

N‑Carcinoma   0   0   0   0   0   0   0   1

Thrombus   0   0   0   0   0   0   1   0

Parathyroid Number Examined:  33  22  30  28  25  23  24  29

Unremarkable:  30  19  28  25  25  22  24  29

B‑Adenoma   0   1   1   1   0   1   0   0

Hyperplasia   3   2   1   2   0   0   0   0

‑‑‑‑‑‑‑‑‑‑‑‑‑‑‑‑‑‑‑‑‑‑‑‑‑‑‑‑‑‑‑‑‑‑‑‑‑‑‑‑‑‑‑‑‑‑‑‑‑‑‑‑‑‑‑‑‑‑‑‑‑‑‑‑‑‑‑‑‑‑‑‑‑‑‑‑‑‑‑‑‑‑‑‑‑‑‑‑‑‑‑‑‑‑‑‑‑‑‑‑‑‑‑‑‑‑‑

Table

Incidence of Microscopic Observations

Terminal Euthanasia (Dosing Phase)

Test Article (dosage) 1M 2M 3M 4M 1F 2F 3F 4F

‑‑‑‑‑‑‑‑‑‑‑‑‑‑‑‑‑‑‑‑‑‑‑‑‑‑‑ ‑‑‑‑‑‑‑‑ ‑‑ ‑‑ ‑‑ ‑‑ ‑‑ ‑‑ ‑‑ ‑‑

Benzonatate (PF‑00345410) mg/kg/day 0 10 30 90 0 5 15 50

‑‑‑‑‑‑‑‑‑‑‑‑‑‑‑‑‑‑‑‑‑‑‑‑‑‑‑‑‑‑‑‑‑‑‑‑‑‑‑‑‑‑‑‑‑‑‑‑‑‑‑‑‑‑‑‑‑‑‑‑‑‑‑‑‑‑‑‑‑‑‑‑‑‑‑‑‑‑‑‑‑‑‑‑‑‑‑‑‑‑‑‑‑‑‑‑‑‑‑‑‑‑‑‑‑‑‑‑

Tissue/ Group/Subgroup/Sex: 1/1/M 2/1/M 3/1/M 4/1/M 1/1/F 2/1/F 3/1/F 4/1/F

Observation Number of Animals:  33  24  31  28  25  23  24  30

‑‑‑‑‑‑‑‑‑‑‑‑‑‑‑‑‑‑‑‑‑‑‑‑‑‑‑‑‑‑‑‑‑‑‑‑‑‑‑‑‑‑‑‑‑‑‑‑‑‑‑‑‑‑‑‑‑‑‑‑‑‑‑‑‑‑‑‑‑‑‑‑‑‑‑‑‑‑‑‑‑‑‑‑‑‑‑‑‑‑‑‑‑‑‑‑‑‑‑‑‑‑‑‑‑‑‑‑

Pituitary Number Examined:  33  24  31  28  25  23  24  30

Unremarkable:  10  10   9   9   3   2   5   2

B‑Adenoma  13   6  12  13  18  18  18  26

Cyst, craniopharyngeal   2   1   0   0   0   0   0   0

Hyperplasia  10   9  11   8   4   3   2   5

M‑Carcinoma   0   0   0   0   1   0   0   0

Preputial Gland Number Examined:   1   1   0   0   0   0   0   0

Unremarkable:   0   0   0   0   0   0   0   0

Inflammation, chronic‑active   1   1   0   0   0   0   0   0

Prostate Number Examined:  33  24  31  28   0   0   0   0

Unremarkable:  15  10   9  14   0   0   0   0

B‑Adenoma   0   0   1   1   0   0   0   0

Hyperplasia   1   0   2   1   0   0   0   0

Inflammation, chronic‑active  17  14  20  14   0   0   0   0

M‑Carcinoma   0   0   1   0   0   0   0   0

Seminal Vesicle Number Examined:  33  24  31  28   0   0   0   0

Unremarkable:  29  24  29  27   0   0   0   0

Decreased secretion   2   0   0   0   0   0   0   0

Hyperplasia   1   0   1   1   0   0   0   0

Inflammation, chronic‑active   3   0   2   0   0   0   0   0

‑‑‑‑‑‑‑‑‑‑‑‑‑‑‑‑‑‑‑‑‑‑‑‑‑‑‑‑‑‑‑‑‑‑‑‑‑‑‑‑‑‑‑‑‑‑‑‑‑‑‑‑‑‑‑‑‑‑‑‑‑‑‑‑‑‑‑‑‑‑‑‑‑‑‑‑‑‑‑‑‑‑‑‑‑‑‑‑‑‑‑‑‑‑‑‑‑‑‑‑‑‑‑‑‑‑‑

Table

Incidence of Microscopic Observations

Terminal Euthanasia (Dosing Phase)

Test Article (dosage) 1M 2M 3M 4M 1F 2F 3F 4F

‑‑‑‑‑‑‑‑‑‑‑‑‑‑‑‑‑‑‑‑‑‑‑‑‑‑‑ ‑‑‑‑‑‑‑‑ ‑‑ ‑‑ ‑‑ ‑‑ ‑‑ ‑‑ ‑‑ ‑‑

Benzonatate (PF‑00345410) mg/kg/day 0 10 30 90 0 5 15 50

‑‑‑‑‑‑‑‑‑‑‑‑‑‑‑‑‑‑‑‑‑‑‑‑‑‑‑‑‑‑‑‑‑‑‑‑‑‑‑‑‑‑‑‑‑‑‑‑‑‑‑‑‑‑‑‑‑‑‑‑‑‑‑‑‑‑‑‑‑‑‑‑‑‑‑‑‑‑‑‑‑‑‑‑‑‑‑‑‑‑‑‑‑‑‑‑‑‑‑‑‑‑‑‑‑‑‑‑

Tissue/ Group/Subgroup/Sex: 1/1/M 2/1/M 3/1/M 4/1/M 1/1/F 2/1/F 3/1/F 4/1/F

Observation Number of Animals:  33  24  31  28  25  23  24  30

‑‑‑‑‑‑‑‑‑‑‑‑‑‑‑‑‑‑‑‑‑‑‑‑‑‑‑‑‑‑‑‑‑‑‑‑‑‑‑‑‑‑‑‑‑‑‑‑‑‑‑‑‑‑‑‑‑‑‑‑‑‑‑‑‑‑‑‑‑‑‑‑‑‑‑‑‑‑‑‑‑‑‑‑‑‑‑‑‑‑‑‑‑‑‑‑‑‑‑‑‑‑‑‑‑‑‑‑

Skin/Subcutis Number Examined:  33  23  31  28  25  23  24  30

Unremarkable:  22  19  28  20  24  22  20  25

B‑Adenoma, sebaceous   0   0   1   1   0   0   0   0

B‑Fibroma   1   1   0   0   0   0   0   1

B‑Hibernoma   1   0   0   0   0   0   0   0

B‑Keratoacanthoma   5   0   1   2   0   0   0   0

B‑Papilloma, squamous cell   2   1   1   1   0   0   1   0

C‑Hematopoietic neoplasm, see

body, whole for type 1 0 0 0 0 0 0 0

C‑Vascular neoplasm, see body,

whole for type 0 0 0 0 1 0 0 0

Erosion/ulcer   0   1   0   0   0   1   1   1

Inflammation, chronic‑active   2   1   0   4   0   1   2   4

M‑Carcinoma   1   0   0   0   0   0   0   0

M‑Carcinoma, squamous cell   0   0   0   1   0   0   0   0

M‑Fibrosarcoma   0   0   0   0   0   0   1   0

M‑Liposarcoma   0   1   0   0   0   0   0   0

Spinal Cord Number Examined:  33  24  31  28  25  23  24  30

Unremarkable:  33  22  29  26  24  22  23  28

Degeneration, axon, increased   0   2   2   2   1   1   1   2

‑‑‑‑‑‑‑‑‑‑‑‑‑‑‑‑‑‑‑‑‑‑‑‑‑‑‑‑‑‑‑‑‑‑‑‑‑‑‑‑‑‑‑‑‑‑‑‑‑‑‑‑‑‑‑‑‑‑‑‑‑‑‑‑‑‑‑‑‑‑‑‑‑‑‑‑‑‑‑‑‑‑‑‑‑‑‑‑‑‑‑‑‑‑‑‑‑‑‑‑‑‑‑‑‑‑‑

Table

Incidence of Microscopic Observations

Terminal Euthanasia (Dosing Phase)

Test Article (dosage) 1M 2M 3M 4M 1F 2F 3F 4F

‑‑‑‑‑‑‑‑‑‑‑‑‑‑‑‑‑‑‑‑‑‑‑‑‑‑‑ ‑‑‑‑‑‑‑‑ ‑‑ ‑‑ ‑‑ ‑‑ ‑‑ ‑‑ ‑‑ ‑‑

Benzonatate (PF‑00345410) mg/kg/day 0 10 30 90 0 5 15 50

‑‑‑‑‑‑‑‑‑‑‑‑‑‑‑‑‑‑‑‑‑‑‑‑‑‑‑‑‑‑‑‑‑‑‑‑‑‑‑‑‑‑‑‑‑‑‑‑‑‑‑‑‑‑‑‑‑‑‑‑‑‑‑‑‑‑‑‑‑‑‑‑‑‑‑‑‑‑‑‑‑‑‑‑‑‑‑‑‑‑‑‑‑‑‑‑‑‑‑‑‑‑‑‑‑‑‑‑

Tissue/ Group/Subgroup/Sex: 1/1/M 2/1/M 3/1/M 4/1/M 1/1/F 2/1/F 3/1/F 4/1/F

Observation Number of Animals:  33  24  31  28  25  23  24  30

‑‑‑‑‑‑‑‑‑‑‑‑‑‑‑‑‑‑‑‑‑‑‑‑‑‑‑‑‑‑‑‑‑‑‑‑‑‑‑‑‑‑‑‑‑‑‑‑‑‑‑‑‑‑‑‑‑‑‑‑‑‑‑‑‑‑‑‑‑‑‑‑‑‑‑‑‑‑‑‑‑‑‑‑‑‑‑‑‑‑‑‑‑‑‑‑‑‑‑‑‑‑‑‑‑‑‑‑

Spleen Number Examined:  33  24  31  28  25  23  24  30

Unremarkable:  17  18  22  14  14   7  10  11

C‑Hematopoietic neoplasm, see

body, whole for type 0 0 0 0 0 0 0 1

Congestion   0   0   0   0   0   1   0   0

C‑Vascular neoplasm, see body,

whole for type 1 2 0 0 0 0 0 0

Fibrosis, capsule   0   0   0   0   0   1   0   0

Hematoma   0   0   0   0   0   0   0   1

Hematopoiesis, extramedullary,

increased 16 4 9 14 11 14 14 18

Pigment, increased   0   0   0   0   0   1   0   0

Stomach, Glandular Number Examined:  33  24  31  28  25  23  24  30

Unremarkable:  30  24  21  28  25  23  21  29

Degeneration, muscle   1   0   1   0   0   0   0   0

Erosion/ulcer   0   0   2   0   0   0   0   1

Hemorrhage   0   0   7   0   0   0   2   0

Hyperplasia, epithelium   1   0   0   0   0   0   0   0

Inflammation, chronic‑active   1   0   0   0   0   0   0   0

Inflammation, vessel   0   0   1   0   0   0   1   0

‑‑‑‑‑‑‑‑‑‑‑‑‑‑‑‑‑‑‑‑‑‑‑‑‑‑‑‑‑‑‑‑‑‑‑‑‑‑‑‑‑‑‑‑‑‑‑‑‑‑‑‑‑‑‑‑‑‑‑‑‑‑‑‑‑‑‑‑‑‑‑‑‑‑‑‑‑‑‑‑‑‑‑‑‑‑‑‑‑‑‑‑‑‑‑‑‑‑‑‑‑‑‑‑‑‑‑

Table

Incidence of Microscopic Observations

Terminal Euthanasia (Dosing Phase)

Test Article (dosage) 1M 2M 3M 4M 1F 2F 3F 4F

‑‑‑‑‑‑‑‑‑‑‑‑‑‑‑‑‑‑‑‑‑‑‑‑‑‑‑ ‑‑‑‑‑‑‑‑ ‑‑ ‑‑ ‑‑ ‑‑ ‑‑ ‑‑ ‑‑ ‑‑

Benzonatate (PF‑00345410) mg/kg/day 0 10 30 90 0 5 15 50

‑‑‑‑‑‑‑‑‑‑‑‑‑‑‑‑‑‑‑‑‑‑‑‑‑‑‑‑‑‑‑‑‑‑‑‑‑‑‑‑‑‑‑‑‑‑‑‑‑‑‑‑‑‑‑‑‑‑‑‑‑‑‑‑‑‑‑‑‑‑‑‑‑‑‑‑‑‑‑‑‑‑‑‑‑‑‑‑‑‑‑‑‑‑‑‑‑‑‑‑‑‑‑‑‑‑‑‑

Tissue/ Group/Subgroup/Sex: 1/1/M 2/1/M 3/1/M 4/1/M 1/1/F 2/1/F 3/1/F 4/1/F

Observation Number of Animals:  33  24  31  28  25  23  24  30

‑‑‑‑‑‑‑‑‑‑‑‑‑‑‑‑‑‑‑‑‑‑‑‑‑‑‑‑‑‑‑‑‑‑‑‑‑‑‑‑‑‑‑‑‑‑‑‑‑‑‑‑‑‑‑‑‑‑‑‑‑‑‑‑‑‑‑‑‑‑‑‑‑‑‑‑‑‑‑‑‑‑‑‑‑‑‑‑‑‑‑‑‑‑‑‑‑‑‑‑‑‑‑‑‑‑‑‑

Stomach,

Nonglandular Number Examined: 33 24 31 28 25 23 24 30

Unremarkable: 30 23 30 28 25 23 23 30

Hyperplasia, epithelium   3   0   1   0   0   0   1   0

Inflammation, chronic‑active   3   0   0   0   0   0   0   0

M‑Sarcoma   0   1   0   0   0   0   0   0

Ulcer/erosion   1   0   0   0   0   0   0   0

Testis Number Examined:  33  24  31  28   0   0   0   0

Unremarkable:  26  20  27  23   0   0   0   0

Atrophy/degeneration   5   3   2   3   0   0   0   0

B‑Interstitial cell tumor   2   1   1   1   0   0   0   0

C‑Mesothelioma, see body, whole   0   1   0   1   0   0   0   0

Edema   0   0   1   1   0   0   0   0

Granuloma, sperm   1   0   0   0   0   0   0   0

‑‑‑‑‑‑‑‑‑‑‑‑‑‑‑‑‑‑‑‑‑‑‑‑‑‑‑‑‑‑‑‑‑‑‑‑‑‑‑‑‑‑‑‑‑‑‑‑‑‑‑‑‑‑‑‑‑‑‑‑‑‑‑‑‑‑‑‑‑‑‑‑‑‑‑‑‑‑‑‑‑‑‑‑‑‑‑‑‑‑‑‑‑‑‑‑‑‑‑‑‑‑‑‑‑‑‑

Table

Incidence of Microscopic Observations

Terminal Euthanasia (Dosing Phase)

Test Article (dosage) 1M 2M 3M 4M 1F 2F 3F 4F

‑‑‑‑‑‑‑‑‑‑‑‑‑‑‑‑‑‑‑‑‑‑‑‑‑‑‑ ‑‑‑‑‑‑‑‑ ‑‑ ‑‑ ‑‑ ‑‑ ‑‑ ‑‑ ‑‑ ‑‑

Benzonatate (PF‑00345410) mg/kg/day 0 10 30 90 0 5 15 50

‑‑‑‑‑‑‑‑‑‑‑‑‑‑‑‑‑‑‑‑‑‑‑‑‑‑‑‑‑‑‑‑‑‑‑‑‑‑‑‑‑‑‑‑‑‑‑‑‑‑‑‑‑‑‑‑‑‑‑‑‑‑‑‑‑‑‑‑‑‑‑‑‑‑‑‑‑‑‑‑‑‑‑‑‑‑‑‑‑‑‑‑‑‑‑‑‑‑‑‑‑‑‑‑‑‑‑‑

Tissue/ Group/Subgroup/Sex: 1/1/M 2/1/M 3/1/M 4/1/M 1/1/F 2/1/F 3/1/F 4/1/F

Observation Number of Animals:  33  24  31  28  25  23  24  30

‑‑‑‑‑‑‑‑‑‑‑‑‑‑‑‑‑‑‑‑‑‑‑‑‑‑‑‑‑‑‑‑‑‑‑‑‑‑‑‑‑‑‑‑‑‑‑‑‑‑‑‑‑‑‑‑‑‑‑‑‑‑‑‑‑‑‑‑‑‑‑‑‑‑‑‑‑‑‑‑‑‑‑‑‑‑‑‑‑‑‑‑‑‑‑‑‑‑‑‑‑‑‑‑‑‑‑‑

Thymus Number Examined:  32  24  30  27  25  22  24  30

Unremarkable:  24  16  20  17  11  13  15  14

B‑Thymoma   0   0   2   2   3   3   1   3

C‑Hematopoietic neoplasm, see

body, whole for type 0 1 1 1 0 0 0 0

C‑Mesothelioma, see body whole   0   0   0   1   0   0   0   0

Cyst, increased   0   0   0   0   2   0   2   4

Hemorrhage   0   0   1   0   2   1   1   3

Hyperplasia, epithelium   5   5   4   5   6   4   5  10

Hyperplasia, lymphocyte   3   4   7   5   6   4   4   5

Inflammation, chronic‑active   0   0   0   0   0   0   1   0

Thyroid Number Examined:  33  24  31  28  25  23  24  30

Unremarkable:   0   0   0   0   1   2   0   0

B‑Adenoma, C‑cell   3   5   6   6   5   6   2   5

B‑Adenoma, follicular cell   7   7   7   5   1   3   2   1

Cyst, follicle   6   7   2   2   5   5   2   4

Hyperplasia, diffuse, C‑cell  33  23  30  28  23  18  24  29

Hyperplasia, focal, C‑cell   4   2   3   4   1   4   4   3

Hyperplasia, follicular cell   6   6   7   3   2   4   2   2

Infiltrate, mononuclear cell   0   0   0   1   0   1   0   0

M‑Carcinoma, C‑cell   0   1   0   0   0   0   0   0

M‑Carcinoma, follicular cell   3   1   3   3   1   0   1   1

‑‑‑‑‑‑‑‑‑‑‑‑‑‑‑‑‑‑‑‑‑‑‑‑‑‑‑‑‑‑‑‑‑‑‑‑‑‑‑‑‑‑‑‑‑‑‑‑‑‑‑‑‑‑‑‑‑‑‑‑‑‑‑‑‑‑‑‑‑‑‑‑‑‑‑‑‑‑‑‑‑‑‑‑‑‑‑‑‑‑‑‑‑‑‑‑‑‑‑‑‑‑‑‑‑‑‑

Table

Incidence of Microscopic Observations

Terminal Euthanasia (Dosing Phase)

Test Article (dosage) 1M 2M 3M 4M 1F 2F 3F 4F

‑‑‑‑‑‑‑‑‑‑‑‑‑‑‑‑‑‑‑‑‑‑‑‑‑‑‑ ‑‑‑‑‑‑‑‑ ‑‑ ‑‑ ‑‑ ‑‑ ‑‑ ‑‑ ‑‑ ‑‑

Benzonatate (PF‑00345410) mg/kg/day 0 10 30 90 0 5 15 50

‑‑‑‑‑‑‑‑‑‑‑‑‑‑‑‑‑‑‑‑‑‑‑‑‑‑‑‑‑‑‑‑‑‑‑‑‑‑‑‑‑‑‑‑‑‑‑‑‑‑‑‑‑‑‑‑‑‑‑‑‑‑‑‑‑‑‑‑‑‑‑‑‑‑‑‑‑‑‑‑‑‑‑‑‑‑‑‑‑‑‑‑‑‑‑‑‑‑‑‑‑‑‑‑‑‑‑‑

Tissue/ Group/Subgroup/Sex: 1/1/M 2/1/M 3/1/M 4/1/M 1/1/F 2/1/F 3/1/F 4/1/F

Observation Number of Animals:  33  24  31  28  25  23  24  30

‑‑‑‑‑‑‑‑‑‑‑‑‑‑‑‑‑‑‑‑‑‑‑‑‑‑‑‑‑‑‑‑‑‑‑‑‑‑‑‑‑‑‑‑‑‑‑‑‑‑‑‑‑‑‑‑‑‑‑‑‑‑‑‑‑‑‑‑‑‑‑‑‑‑‑‑‑‑‑‑‑‑‑‑‑‑‑‑‑‑‑‑‑‑‑‑‑‑‑‑‑‑‑‑‑‑‑‑

Tongue Number Examined:  33  24  31  28  25  23  24  30

Unremarkable:  33  24  30  28  25  23  23  29

Infiltrate, mononuclear cell   0   0   1   0   0   0   0   1

Inflammation, chronic‑active   0   0   0   0   0   0   1   0

Ureter Number Examined:  33  24  31  28  25  23  24  29

Unremarkable:  33  24  30  27  25  23  24  29

Hyperplasia, transitional cell   0   0   0   1   0   0   0   0

Inflammation   0   0   1   1   0   0   0   0

Urinary Bladder Number Examined:  33  24  31  28  25  23  24  29

Unremarkable:  33  24  30  28  25  23  24  29

Hemorrhage   0   0   1   0   0   0   0   0

Inflammation   0   0   1   0   0   0   0   0

Uterus Number Examined:   0   0   0   0  25  23  24  30

Unremarkable:   0   0   0   0  15  14  15  23

B‑Polyp, endometrial stromal   0   0   0   0   1   4   1   0

Cyst   0   0   0   0   1   5   5   3

Dilatation   0   0   0   0   3   0   2   0

Hyperplasia, cystic endometrial   0   0   0   0   2   1   1   1

Hyperplasia, endometrium   0   0   0   0   0   1   0   1

Inflammation, chronic‑active   0   0   0   0   0   0   0   1

Intussusception   0   0   0   0   0   1   0   0

Lumen, debris, cellular   0   0   0   0   0   1   0   0

M‑Carcinoma   0   0   0   0   3   0   0   1

‑‑‑‑‑‑‑‑‑‑‑‑‑‑‑‑‑‑‑‑‑‑‑‑‑‑‑‑‑‑‑‑‑‑‑‑‑‑‑‑‑‑‑‑‑‑‑‑‑‑‑‑‑‑‑‑‑‑‑‑‑‑‑‑‑‑‑‑‑‑‑‑‑‑‑‑‑‑‑‑‑‑‑‑‑‑‑‑‑‑‑‑‑‑‑‑‑‑‑‑‑‑‑‑‑‑‑

Table

Incidence of Microscopic Observations

Terminal Euthanasia (Dosing Phase)

Test Article (dosage) 1M 2M 3M 4M 1F 2F 3F 4F

‑‑‑‑‑‑‑‑‑‑‑‑‑‑‑‑‑‑‑‑‑‑‑‑‑‑‑ ‑‑‑‑‑‑‑‑ ‑‑ ‑‑ ‑‑ ‑‑ ‑‑ ‑‑ ‑‑ ‑‑

Benzonatate (PF‑00345410) mg/kg/day 0 10 30 90 0 5 15 50

‑‑‑‑‑‑‑‑‑‑‑‑‑‑‑‑‑‑‑‑‑‑‑‑‑‑‑‑‑‑‑‑‑‑‑‑‑‑‑‑‑‑‑‑‑‑‑‑‑‑‑‑‑‑‑‑‑‑‑‑‑‑‑‑‑‑‑‑‑‑‑‑‑‑‑‑‑‑‑‑‑‑‑‑‑‑‑‑‑‑‑‑‑‑‑‑‑‑‑‑‑‑‑‑‑‑‑‑

Tissue/ Group/Subgroup/Sex: 1/1/M 2/1/M 3/1/M 4/1/M 1/1/F 2/1/F 3/1/F 4/1/F

Observation Number of Animals:  33  24  31  28  25  23  24  30

‑‑‑‑‑‑‑‑‑‑‑‑‑‑‑‑‑‑‑‑‑‑‑‑‑‑‑‑‑‑‑‑‑‑‑‑‑‑‑‑‑‑‑‑‑‑‑‑‑‑‑‑‑‑‑‑‑‑‑‑‑‑‑‑‑‑‑‑‑‑‑‑‑‑‑‑‑‑‑‑‑‑‑‑‑‑‑‑‑‑‑‑‑‑‑‑‑‑‑‑‑‑‑‑‑‑‑‑

Vagina Number Examined:   0   0   0   0  25  23  24  30

Unremarkable:   0   0   0   0  16  14  15  13

Exudate, lumen   0   0   0   0   0   2   0   0

Mucification, epithelium   0   0   0   0   9   9   9  17

‑‑‑‑‑‑‑‑‑‑‑‑‑‑‑‑‑‑‑‑‑‑‑‑‑‑‑‑‑‑‑‑‑‑‑‑‑‑‑‑‑‑‑‑‑‑‑‑‑‑‑‑‑‑‑‑‑‑‑‑‑‑‑‑‑‑‑‑‑‑‑‑‑‑‑‑‑‑‑‑‑‑‑‑‑‑‑‑‑‑‑‑‑‑‑‑‑‑‑‑‑‑‑‑‑‑‑

Table 5.5: Incidence of Microscopic Observations - Unscheduled Euthanasias and Deaths

Test Article (dosage) 1M 2M 3M 4M 1F 2F 3F 4F

‑‑‑‑‑‑‑‑‑‑‑‑‑‑‑‑‑‑‑‑‑‑‑‑‑‑‑ ‑‑‑‑‑‑‑‑ ‑‑ ‑‑ ‑‑ ‑‑ ‑‑ ‑‑ ‑‑ ‑‑

Benzonatate (PF‑00345410) mg/kg/day 0 10 30 90 0 5 15 50

‑‑‑‑‑‑‑‑‑‑‑‑‑‑‑‑‑‑‑‑‑‑‑‑‑‑‑‑‑‑‑‑‑‑‑‑‑‑‑‑‑‑‑‑‑‑‑‑‑‑‑‑‑‑‑‑‑‑‑‑‑‑‑‑‑‑‑‑‑‑‑‑‑‑‑‑‑‑‑‑‑‑‑‑‑‑‑‑‑‑‑‑‑‑‑‑‑‑‑‑‑‑‑‑‑‑‑‑

Tissue/ Group/Subgroup/Sex: 1/1/M 2/1/M 3/1/M 4/1/M 1/1/F 2/1/F 3/1/F 4/1/F

Observation Number of Animals:  22  26  19  27  30  27  26  25

‑‑‑‑‑‑‑‑‑‑‑‑‑‑‑‑‑‑‑‑‑‑‑‑‑‑‑‑‑‑‑‑‑‑‑‑‑‑‑‑‑‑‑‑‑‑‑‑‑‑‑‑‑‑‑‑‑‑‑‑‑‑‑‑‑‑‑‑‑‑‑‑‑‑‑‑‑‑‑‑‑‑‑‑‑‑‑‑‑‑‑‑‑‑‑‑‑‑‑‑‑‑‑‑‑‑‑‑

Abdominal Cavity Number Examined:   0   0   0   0   1   1   1   0

Unremarkable:   0   0   0   0   0   0   0   0

C‑Vascular neoplasm, see body,

whole for type 0 0 0 0 0 1 0 0

Hemorrhage   0   0   0   0   1   0   0   0

I‑Carcinoma   0   0   0   0   0   0   1   0

Adipose, Other Number Examined:   0   0   0   0   1   0   0   3

Unremarkable:   0   0   0   0   0   0   0   1

N‑Carcinoma   0   0   0   0   1   0   0   1

Necrosis   0   0   0   0   0   0   0   1

Adipose, White,

Mesenteric Number Examined: 0 0 0 1 0 0 0 0

Unremarkable: 0 0 0 0 0 0 0 0

M‑Fibrosarcoma   0   0   0   1   0   0   0   0

‑‑‑‑‑‑‑‑‑‑‑‑‑‑‑‑‑‑‑‑‑‑‑‑‑‑‑‑‑‑‑‑‑‑‑‑‑‑‑‑‑‑‑‑‑‑‑‑‑‑‑‑‑‑‑‑‑‑‑‑‑‑‑‑‑‑‑‑‑‑‑‑‑‑‑‑‑‑‑‑‑‑‑‑‑‑‑‑‑‑‑‑‑‑‑‑‑‑‑‑‑‑‑‑‑‑‑

Table

Incidence of Microscopic Observations

Unscheduled Euthanasias and Deaths

Test Article (dosage) 1M 2M 3M 4M 1F 2F 3F 4F

‑‑‑‑‑‑‑‑‑‑‑‑‑‑‑‑‑‑‑‑‑‑‑‑‑‑‑ ‑‑‑‑‑‑‑‑ ‑‑ ‑‑ ‑‑ ‑‑ ‑‑ ‑‑ ‑‑ ‑‑

Benzonatate (PF‑00345410) mg/kg/day 0 10 30 90 0 5 15 50

‑‑‑‑‑‑‑‑‑‑‑‑‑‑‑‑‑‑‑‑‑‑‑‑‑‑‑‑‑‑‑‑‑‑‑‑‑‑‑‑‑‑‑‑‑‑‑‑‑‑‑‑‑‑‑‑‑‑‑‑‑‑‑‑‑‑‑‑‑‑‑‑‑‑‑‑‑‑‑‑‑‑‑‑‑‑‑‑‑‑‑‑‑‑‑‑‑‑‑‑‑‑‑‑‑‑‑‑

Tissue/ Group/Subgroup/Sex: 1/1/M 2/1/M 3/1/M 4/1/M 1/1/F 2/1/F 3/1/F 4/1/F

Observation Number of Animals:  22  26  19  27  30  27  26  25

‑‑‑‑‑‑‑‑‑‑‑‑‑‑‑‑‑‑‑‑‑‑‑‑‑‑‑‑‑‑‑‑‑‑‑‑‑‑‑‑‑‑‑‑‑‑‑‑‑‑‑‑‑‑‑‑‑‑‑‑‑‑‑‑‑‑‑‑‑‑‑‑‑‑‑‑‑‑‑‑‑‑‑‑‑‑‑‑‑‑‑‑‑‑‑‑‑‑‑‑‑‑‑‑‑‑‑‑

Adrenal, Cortex Number Examined:  22  25  19  27  30  27  26  25

Unremarkable:  12  11   6  14   3   3   3   1

Atrophy   0   0   0   0   0   0   0   1

B‑Adenoma   0   1   0   0   0   1   1   1

Degeneration, cystic/hemorrhagic  10  13  13  12  27  23  23  23

Hematopoiesis, increased   0   0   0   0   0   0   0   1

Hyperplasia   0   1   0   1   0   2   0   1

Hypertrophy   0   2   2   0   3   0   1   2

M‑Carcinoma   0   0   0   0   0   0   1   0

N‑Carcinoma   0   0   0   0   1   0   0   0

Necrosis   0   1   0   0   0   0   0   0

Adrenal, Medulla Number Examined:  22  25  19  27  30  27  26  25

Unremarkable:  22  24  18  26  30  27  25  25

B‑Pheochromocytoma   0   0   1   0   0   0   0   0

Infiltrate, mononuclear cell   0   0   0   1   0   0   1   0

M‑Malignant pheochromocytoma   0   1   0   0   0   0   0   0

Aorta Number Examined:  22  26  19  27  30  27  26  25

Unremarkable:  22  25  19  27  30  27  26  25

Mineralization   0   1   0   0   0   0   0   0

‑‑‑‑‑‑‑‑‑‑‑‑‑‑‑‑‑‑‑‑‑‑‑‑‑‑‑‑‑‑‑‑‑‑‑‑‑‑‑‑‑‑‑‑‑‑‑‑‑‑‑‑‑‑‑‑‑‑‑‑‑‑‑‑‑‑‑‑‑‑‑‑‑‑‑‑‑‑‑‑‑‑‑‑‑‑‑‑‑‑‑‑‑‑‑‑‑‑‑‑‑‑‑‑‑‑‑

Table

Incidence of Microscopic Observations

Unscheduled Euthanasias and Deaths

Test Article (dosage) 1M 2M 3M 4M 1F 2F 3F 4F

‑‑‑‑‑‑‑‑‑‑‑‑‑‑‑‑‑‑‑‑‑‑‑‑‑‑‑ ‑‑‑‑‑‑‑‑ ‑‑ ‑‑ ‑‑ ‑‑ ‑‑ ‑‑ ‑‑ ‑‑

Benzonatate (PF‑00345410) mg/kg/day 0 10 30 90 0 5 15 50

‑‑‑‑‑‑‑‑‑‑‑‑‑‑‑‑‑‑‑‑‑‑‑‑‑‑‑‑‑‑‑‑‑‑‑‑‑‑‑‑‑‑‑‑‑‑‑‑‑‑‑‑‑‑‑‑‑‑‑‑‑‑‑‑‑‑‑‑‑‑‑‑‑‑‑‑‑‑‑‑‑‑‑‑‑‑‑‑‑‑‑‑‑‑‑‑‑‑‑‑‑‑‑‑‑‑‑‑

Tissue/ Group/Subgroup/Sex: 1/1/M 2/1/M 3/1/M 4/1/M 1/1/F 2/1/F 3/1/F 4/1/F

Observation Number of Animals:  22  26  19  27  30  27  26  25

‑‑‑‑‑‑‑‑‑‑‑‑‑‑‑‑‑‑‑‑‑‑‑‑‑‑‑‑‑‑‑‑‑‑‑‑‑‑‑‑‑‑‑‑‑‑‑‑‑‑‑‑‑‑‑‑‑‑‑‑‑‑‑‑‑‑‑‑‑‑‑‑‑‑‑‑‑‑‑‑‑‑‑‑‑‑‑‑‑‑‑‑‑‑‑‑‑‑‑‑‑‑‑‑‑‑‑‑

Body, Whole/Cavity Number Examined:  22  26  19  27  30  27  26  25

Unremarkable:  20  20  15  19  27  24  21  21

B‑Hemangioma   0   1   1   1   1   0   0   0

M‑Hemangiosarcoma   1   2   1   4   0   2   1   0

M‑Histiocytic Sarcoma   0   3   1   2   2   1   1   4

M‑Lymphosarcoma   2   1   1   1   0   0   3   0

Brain Number Examined:  22  26  19  27  30  27  26  25

Unremarkable:  10  15  11  14  11  10  10   9

B‑Granular cell tumor   0   1   0   1   0   0   0   0

B‑Oligodendroglioma   1   0   0   2   0   0   0   0

C‑Hematopoietic neoplasm, see

body, whole for type 0 0 0 1 0 0 0 0

Compression, ventral   8  10   8   8  19  17  16  16

Gliosis   0   0   0   1   0   1   0   0

Hemorrhage   1   0   0   0   0   0   0   0

I‑Carcinoma   0   0   0   1   1   0   0   1

M‑Malignant astrocytoma   1   0   0   0   0   0   0   0

M‑Meningeal sarcoma   0   0   0   1   0   0   0   0

Necrosis, gray matter   0   0   0   1   0   1   0   0

Necrosis/loss, neurons   0   1   0   0   0   0   0   0

Vacuoles, white matter   1   0   0   0   0   0   0   0

Cecum Number Examined:  22  25  19  25  30  25  26  25

Unremarkable:  22  25  19  25  30  25  26  24

Erosion/ulcer   0   0   0   0   0   0   0   1

‑‑‑‑‑‑‑‑‑‑‑‑‑‑‑‑‑‑‑‑‑‑‑‑‑‑‑‑‑‑‑‑‑‑‑‑‑‑‑‑‑‑‑‑‑‑‑‑‑‑‑‑‑‑‑‑‑‑‑‑‑‑‑‑‑‑‑‑‑‑‑‑‑‑‑‑‑‑‑‑‑‑‑‑‑‑‑‑‑‑‑‑‑‑‑‑‑‑‑‑‑‑‑‑‑‑‑

Table

Incidence of Microscopic Observations

Unscheduled Euthanasias and Deaths

Test Article (dosage) 1M 2M 3M 4M 1F 2F 3F 4F

‑‑‑‑‑‑‑‑‑‑‑‑‑‑‑‑‑‑‑‑‑‑‑‑‑‑‑ ‑‑‑‑‑‑‑‑ ‑‑ ‑‑ ‑‑ ‑‑ ‑‑ ‑‑ ‑‑ ‑‑

Benzonatate (PF‑00345410) mg/kg/day 0 10 30 90 0 5 15 50

‑‑‑‑‑‑‑‑‑‑‑‑‑‑‑‑‑‑‑‑‑‑‑‑‑‑‑‑‑‑‑‑‑‑‑‑‑‑‑‑‑‑‑‑‑‑‑‑‑‑‑‑‑‑‑‑‑‑‑‑‑‑‑‑‑‑‑‑‑‑‑‑‑‑‑‑‑‑‑‑‑‑‑‑‑‑‑‑‑‑‑‑‑‑‑‑‑‑‑‑‑‑‑‑‑‑‑‑

Tissue/ Group/Subgroup/Sex: 1/1/M 2/1/M 3/1/M 4/1/M 1/1/F 2/1/F 3/1/F 4/1/F

Observation Number of Animals:  22  26  19  27  30  27  26  25

‑‑‑‑‑‑‑‑‑‑‑‑‑‑‑‑‑‑‑‑‑‑‑‑‑‑‑‑‑‑‑‑‑‑‑‑‑‑‑‑‑‑‑‑‑‑‑‑‑‑‑‑‑‑‑‑‑‑‑‑‑‑‑‑‑‑‑‑‑‑‑‑‑‑‑‑‑‑‑‑‑‑‑‑‑‑‑‑‑‑‑‑‑‑‑‑‑‑‑‑‑‑‑‑‑‑‑‑

Cervix Number Examined:   0   0   0   0  30  27  26  25

Unremarkable:   0   0   0   0  25  21  21  21

B‑Polyp, stromal   0   0   0   0   1   1   0   0

C‑Hematopoietic neoplasm, see

body, whole for type 0 0 0 0 0 0 1 2

C‑Vascular neoplasm, see body,

whole for type 0 0 0 0 0 0 1 0

Cyst   0   0   0   0   0   1   0   0

Hyperplasia, epithelium   0   0   0   0   2   1   0   2

I‑Carcinoma   0   0   0   0   0   1   0   0

I‑Sarcoma   0   0   0   0   1   0   0   0

Lumen, exudate/debris   0   0   0   0   3   1   0   0

M‑Carcinoma   0   0   0   0   0   0   1   0

M‑Carcinoma, squamous cell   0   0   0   0   0   1   0   0

M‑Leiomyosarcoma   0   0   0   0   0   0   1   0

M‑Sarcoma, stromal   0   0   0   0   0   1   2   0

Clitoral Gland Number Examined:   0   0   0   0   1   1   0   3

Unremarkable:   0   0   0   0   0   0   0   1

Inflammation/cyst   0   0   0   0   1   0   0   2

M‑Carcinoma   0   0   0   0   0   1   0   0

‑‑‑‑‑‑‑‑‑‑‑‑‑‑‑‑‑‑‑‑‑‑‑‑‑‑‑‑‑‑‑‑‑‑‑‑‑‑‑‑‑‑‑‑‑‑‑‑‑‑‑‑‑‑‑‑‑‑‑‑‑‑‑‑‑‑‑‑‑‑‑‑‑‑‑‑‑‑‑‑‑‑‑‑‑‑‑‑‑‑‑‑‑‑‑‑‑‑‑‑‑‑‑‑‑‑‑

Table

Incidence of Microscopic Observations

Unscheduled Euthanasias and Deaths

Test Article (dosage) 1M 2M 3M 4M 1F 2F 3F 4F

‑‑‑‑‑‑‑‑‑‑‑‑‑‑‑‑‑‑‑‑‑‑‑‑‑‑‑ ‑‑‑‑‑‑‑‑ ‑‑ ‑‑ ‑‑ ‑‑ ‑‑ ‑‑ ‑‑ ‑‑

Benzonatate (PF‑00345410) mg/kg/day 0 10 30 90 0 5 15 50

‑‑‑‑‑‑‑‑‑‑‑‑‑‑‑‑‑‑‑‑‑‑‑‑‑‑‑‑‑‑‑‑‑‑‑‑‑‑‑‑‑‑‑‑‑‑‑‑‑‑‑‑‑‑‑‑‑‑‑‑‑‑‑‑‑‑‑‑‑‑‑‑‑‑‑‑‑‑‑‑‑‑‑‑‑‑‑‑‑‑‑‑‑‑‑‑‑‑‑‑‑‑‑‑‑‑‑‑

Tissue/ Group/Subgroup/Sex: 1/1/M 2/1/M 3/1/M 4/1/M 1/1/F 2/1/F 3/1/F 4/1/F

Observation Number of Animals:  22  26  19  27  30  27  26  25

‑‑‑‑‑‑‑‑‑‑‑‑‑‑‑‑‑‑‑‑‑‑‑‑‑‑‑‑‑‑‑‑‑‑‑‑‑‑‑‑‑‑‑‑‑‑‑‑‑‑‑‑‑‑‑‑‑‑‑‑‑‑‑‑‑‑‑‑‑‑‑‑‑‑‑‑‑‑‑‑‑‑‑‑‑‑‑‑‑‑‑‑‑‑‑‑‑‑‑‑‑‑‑‑‑‑‑‑

Colon Number Examined:  22  26  19  27  30  27  26  25

Unremarkable:  22  26  19  26  28  27  26  25

C‑Hematopoietic neoplasm, see

body, whole for type 0 0 0 0 1 0 0 0

Parasite, nematode   0   0   0   1   1   0   0   0

‑‑‑‑‑‑‑‑‑‑‑‑‑‑‑‑‑‑‑‑‑‑‑‑‑‑‑‑‑‑‑‑‑‑‑‑‑‑‑‑‑‑‑‑‑‑‑‑‑‑‑‑‑‑‑‑‑‑‑‑‑‑‑‑‑‑‑‑‑‑‑‑‑‑‑‑‑‑‑‑‑‑‑‑‑‑‑‑‑‑‑‑‑‑‑‑‑‑‑‑‑‑‑‑‑‑‑

Table

Incidence of Microscopic Observations

Unscheduled Euthanasias and Deaths

Test Article (dosage) 1M 2M 3M 4M 1F 2F 3F 4F

‑‑‑‑‑‑‑‑‑‑‑‑‑‑‑‑‑‑‑‑‑‑‑‑‑‑‑ ‑‑‑‑‑‑‑‑ ‑‑ ‑‑ ‑‑ ‑‑ ‑‑ ‑‑ ‑‑ ‑‑

Benzonatate (PF‑00345410) mg/kg/day 0 10 30 90 0 5 15 50

‑‑‑‑‑‑‑‑‑‑‑‑‑‑‑‑‑‑‑‑‑‑‑‑‑‑‑‑‑‑‑‑‑‑‑‑‑‑‑‑‑‑‑‑‑‑‑‑‑‑‑‑‑‑‑‑‑‑‑‑‑‑‑‑‑‑‑‑‑‑‑‑‑‑‑‑‑‑‑‑‑‑‑‑‑‑‑‑‑‑‑‑‑‑‑‑‑‑‑‑‑‑‑‑‑‑‑‑

Tissue/ Group/Subgroup/Sex: 1/1/M 2/1/M 3/1/M 4/1/M 1/1/F 2/1/F 3/1/F 4/1/F

Observation Number of Animals:  22  26  19  27  30  27  26  25

‑‑‑‑‑‑‑‑‑‑‑‑‑‑‑‑‑‑‑‑‑‑‑‑‑‑‑‑‑‑‑‑‑‑‑‑‑‑‑‑‑‑‑‑‑‑‑‑‑‑‑‑‑‑‑‑‑‑‑‑‑‑‑‑‑‑‑‑‑‑‑‑‑‑‑‑‑‑‑‑‑‑‑‑‑‑‑‑‑‑‑‑‑‑‑‑‑‑‑‑‑‑‑‑‑‑‑‑

Death Comment Number Examined:  22  26  19  27  30  27  26  25

Unremarkable:   0   0   0   0   0   0   0   0

Accidental   1   0   0   0   1   0   0   0

Chronic anemia   0   0   0   0   0   1   0   0

Degeneration, peripheral nerve   0   0   0   1   0   0   0   0

Heart failure   0   1   0   0   0   0   0   0

Hematopoietic neoplasm   1   3   0   3   1   1   1   4

Inflammation   3   3   6   5   1   2   4   2

Malacia, central nervous system   1   0   0   0   0   0   0   0

Mesothelioma   0   0   1   0   0   0   0   0

Neoplasia, abdominal cavity   0   0   0   1   0   0   0   0

Neoplasia, alimentary   1   1   1   0   0   0   0   0

Neoplasia, endocrine   0   0   0   0   1   0   0   0

Neoplasia, mammary   0   0   0   0   3   6   2   3

Neoplasia, nervous system   2   2   0   3   0   0   0   0

Neoplasia, pituitary   8  10   7   5  18  10  13  12

Neoplasia, reproductive/urinary   0   0   0   0   4   3   5   1

Neoplasia, skeletal   0   0   2   0   0   0   0   0

Neoplasia, skin   2   3   1   4   1   1   1   0

Neoplasm, vascular   1   0   0   1   0   1   0   0

Undetermined   2   3   1   4   0   2   0   3

Duodenum Number Examined:  21  24  19  26  30  25  26  25

Unremarkable:  21  24  18  26  30  25  26  25

Ulcer   0   0   1   0   0   0   0   0

‑‑‑‑‑‑‑‑‑‑‑‑‑‑‑‑‑‑‑‑‑‑‑‑‑‑‑‑‑‑‑‑‑‑‑‑‑‑‑‑‑‑‑‑‑‑‑‑‑‑‑‑‑‑‑‑‑‑‑‑‑‑‑‑‑‑‑‑‑‑‑‑‑‑‑‑‑‑‑‑‑‑‑‑‑‑‑‑‑‑‑‑‑‑‑‑‑‑‑‑‑‑‑‑‑‑‑

Table

Incidence of Microscopic Observations

Unscheduled Euthanasias and Deaths

Test Article (dosage) 1M 2M 3M 4M 1F 2F 3F 4F

‑‑‑‑‑‑‑‑‑‑‑‑‑‑‑‑‑‑‑‑‑‑‑‑‑‑‑ ‑‑‑‑‑‑‑‑ ‑‑ ‑‑ ‑‑ ‑‑ ‑‑ ‑‑ ‑‑ ‑‑

Benzonatate (PF‑00345410) mg/kg/day 0 10 30 90 0 5 15 50

‑‑‑‑‑‑‑‑‑‑‑‑‑‑‑‑‑‑‑‑‑‑‑‑‑‑‑‑‑‑‑‑‑‑‑‑‑‑‑‑‑‑‑‑‑‑‑‑‑‑‑‑‑‑‑‑‑‑‑‑‑‑‑‑‑‑‑‑‑‑‑‑‑‑‑‑‑‑‑‑‑‑‑‑‑‑‑‑‑‑‑‑‑‑‑‑‑‑‑‑‑‑‑‑‑‑‑‑

Tissue/ Group/Subgroup/Sex: 1/1/M 2/1/M 3/1/M 4/1/M 1/1/F 2/1/F 3/1/F 4/1/F

Observation Number of Animals:  22  26  19  27  30  27  26  25

‑‑‑‑‑‑‑‑‑‑‑‑‑‑‑‑‑‑‑‑‑‑‑‑‑‑‑‑‑‑‑‑‑‑‑‑‑‑‑‑‑‑‑‑‑‑‑‑‑‑‑‑‑‑‑‑‑‑‑‑‑‑‑‑‑‑‑‑‑‑‑‑‑‑‑‑‑‑‑‑‑‑‑‑‑‑‑‑‑‑‑‑‑‑‑‑‑‑‑‑‑‑‑‑‑‑‑‑

Epididymis Number Examined:  22  26  19  27   0   0   0   0

Unremarkable:  20  24  19  27   0   0   0   0

Granuloma, sperm   0   1   0   0   0   0   0   0

Hypospermia   2   1   0   0   0   0   0   0

Esophagus Number Examined:  22  26  19  27  30  27  26  25

Unremarkable:  21  24  19  27  29  25  26  25

Degeneration/regeneration,

muscularis 1 2 0 0 1 2 0 0

Inflammation, chronic‑active   0   0   0   0   1   1   0   0

Ulcer   0   0   0   0   1   0   0   0

Eye Number Examined:  22  26  19  27  30  27  26  25

Unremarkable:  21  20  14  21  23  25  22  21

Atrophy, retina   1   6   5   6   7   1   4   4

Rosette, retina   0   0   0   0   0   1   0   0

Ulceration, cornea   0   0   0   0   0   0   1   0

Foot/Footpad Number Examined:   3   1   6   5   1   1   0   4

Unremarkable:   0   0   0   0   0   0   0   0

Inflammation/hyperplasia   3   1   6   5   1   1   0   4

New bone formation   0   0   0   1   0   0   0   0

Ulcer   0   1   3   2   1   0   0   1

‑‑‑‑‑‑‑‑‑‑‑‑‑‑‑‑‑‑‑‑‑‑‑‑‑‑‑‑‑‑‑‑‑‑‑‑‑‑‑‑‑‑‑‑‑‑‑‑‑‑‑‑‑‑‑‑‑‑‑‑‑‑‑‑‑‑‑‑‑‑‑‑‑‑‑‑‑‑‑‑‑‑‑‑‑‑‑‑‑‑‑‑‑‑‑‑‑‑‑‑‑‑‑‑‑‑‑

Table

Incidence of Microscopic Observations

Unscheduled Euthanasias and Deaths

Test Article (dosage) 1M 2M 3M 4M 1F 2F 3F 4F

‑‑‑‑‑‑‑‑‑‑‑‑‑‑‑‑‑‑‑‑‑‑‑‑‑‑‑ ‑‑‑‑‑‑‑‑ ‑‑ ‑‑ ‑‑ ‑‑ ‑‑ ‑‑ ‑‑ ‑‑

Benzonatate (PF‑00345410) mg/kg/day 0 10 30 90 0 5 15 50

‑‑‑‑‑‑‑‑‑‑‑‑‑‑‑‑‑‑‑‑‑‑‑‑‑‑‑‑‑‑‑‑‑‑‑‑‑‑‑‑‑‑‑‑‑‑‑‑‑‑‑‑‑‑‑‑‑‑‑‑‑‑‑‑‑‑‑‑‑‑‑‑‑‑‑‑‑‑‑‑‑‑‑‑‑‑‑‑‑‑‑‑‑‑‑‑‑‑‑‑‑‑‑‑‑‑‑‑

Tissue/ Group/Subgroup/Sex: 1/1/M 2/1/M 3/1/M 4/1/M 1/1/F 2/1/F 3/1/F 4/1/F

Observation Number of Animals:  22  26  19  27  30  27  26  25

‑‑‑‑‑‑‑‑‑‑‑‑‑‑‑‑‑‑‑‑‑‑‑‑‑‑‑‑‑‑‑‑‑‑‑‑‑‑‑‑‑‑‑‑‑‑‑‑‑‑‑‑‑‑‑‑‑‑‑‑‑‑‑‑‑‑‑‑‑‑‑‑‑‑‑‑‑‑‑‑‑‑‑‑‑‑‑‑‑‑‑‑‑‑‑‑‑‑‑‑‑‑‑‑‑‑‑‑

GALT/Peyer's Patch Number Examined:  21  25  19  27  28  24  23  24

Unremarkable:  21  25  19  26  27  24  23  24

C‑Hematopoietic neoplasm, see

body, whole for type 0 0 0 1 0 0 0 0

Necrosis, lymphocytes   0   0   0   0   1   0   0   0

Harderian Gland Number Examined:  22  26  19  27  30  27  26  25

Unremarkable:  11  17  13  16  20  19  18  18

B‑Adenoma   0   0   0   0   1   0   0   0

Hyperplasia   1   1   1   1   1   1   0   1

Infiltrate, mononuclear cell  10   6   6  11   8   7   6   7

Inflammation, chronic‑active   0   1   0   0   0   0   0   0

Inflammation, granulomatous   1   1   0   0   0   1   2   0

Heart Number Examined:  22  26  19  27  30  27  26  25

Unremarkable:   9   9   3   9  15  15  19  15

Cardiomyopathy, degenerative  12  14  15  17  15  12   6  10

C‑Hematopoietic neoplasm, see

body, whole for type 0 1 0 0 0 0 0 0

Hemorrhage   2   1   0   0   1   1   0   0

Hyperplasia, endocardium   0   0   1   1   0   0   0   0

Infiltrate, mononuclear cell   0   0   0   0   0   0   1   0

Inflammation, vessel   1   0   0   1   0   0   0   0

M‑Atriocaval mesothelioma   0   0   1   0   0   0   0   0

Mineralization, vessel   0   1   0   0   0   0   0   0

Thrombus, atrium   0   1   0   0   0   0   0   0

‑‑‑‑‑‑‑‑‑‑‑‑‑‑‑‑‑‑‑‑‑‑‑‑‑‑‑‑‑‑‑‑‑‑‑‑‑‑‑‑‑‑‑‑‑‑‑‑‑‑‑‑‑‑‑‑‑‑‑‑‑‑‑‑‑‑‑‑‑‑‑‑‑‑‑‑‑‑‑‑‑‑‑‑‑‑‑‑‑‑‑‑‑‑‑‑‑‑‑‑‑‑‑‑‑‑‑

Table

Incidence of Microscopic Observations

Unscheduled Euthanasias and Deaths

Test Article (dosage) 1M 2M 3M 4M 1F 2F 3F 4F

‑‑‑‑‑‑‑‑‑‑‑‑‑‑‑‑‑‑‑‑‑‑‑‑‑‑‑ ‑‑‑‑‑‑‑‑ ‑‑ ‑‑ ‑‑ ‑‑ ‑‑ ‑‑ ‑‑ ‑‑

Benzonatate (PF‑00345410) mg/kg/day 0 10 30 90 0 5 15 50

‑‑‑‑‑‑‑‑‑‑‑‑‑‑‑‑‑‑‑‑‑‑‑‑‑‑‑‑‑‑‑‑‑‑‑‑‑‑‑‑‑‑‑‑‑‑‑‑‑‑‑‑‑‑‑‑‑‑‑‑‑‑‑‑‑‑‑‑‑‑‑‑‑‑‑‑‑‑‑‑‑‑‑‑‑‑‑‑‑‑‑‑‑‑‑‑‑‑‑‑‑‑‑‑‑‑‑‑

Tissue/ Group/Subgroup/Sex: 1/1/M 2/1/M 3/1/M 4/1/M 1/1/F 2/1/F 3/1/F 4/1/F

Observation Number of Animals:  22  26  19  27  30  27  26  25

‑‑‑‑‑‑‑‑‑‑‑‑‑‑‑‑‑‑‑‑‑‑‑‑‑‑‑‑‑‑‑‑‑‑‑‑‑‑‑‑‑‑‑‑‑‑‑‑‑‑‑‑‑‑‑‑‑‑‑‑‑‑‑‑‑‑‑‑‑‑‑‑‑‑‑‑‑‑‑‑‑‑‑‑‑‑‑‑‑‑‑‑‑‑‑‑‑‑‑‑‑‑‑‑‑‑‑‑

Jejunum Number Examined:  19  25  19  25  29  27  25  25

Unremarkable:  19  24  18  25  29  27  25  25

M‑Carcinoma   0   1   0   0   0   0   0   0

M‑Schwannoma   0   0   1   0   0   0   0   0

Joint, Other Number Examined:   1   1   0   0   0   0   0   0

Unremarkable:   1   0   0   0   0   0   0   0

Hyperostosis, periosteum   0   1   0   0   0   0   0   0

‑‑‑‑‑‑‑‑‑‑‑‑‑‑‑‑‑‑‑‑‑‑‑‑‑‑‑‑‑‑‑‑‑‑‑‑‑‑‑‑‑‑‑‑‑‑‑‑‑‑‑‑‑‑‑‑‑‑‑‑‑‑‑‑‑‑‑‑‑‑‑‑‑‑‑‑‑‑‑‑‑‑‑‑‑‑‑‑‑‑‑‑‑‑‑‑‑‑‑‑‑‑‑‑‑‑‑

Table

Incidence of Microscopic Observations

Unscheduled Euthanasias and Deaths

Test Article (dosage) 1M 2M 3M 4M 1F 2F 3F 4F

‑‑‑‑‑‑‑‑‑‑‑‑‑‑‑‑‑‑‑‑‑‑‑‑‑‑‑ ‑‑‑‑‑‑‑‑ ‑‑ ‑‑ ‑‑ ‑‑ ‑‑ ‑‑ ‑‑ ‑‑

Benzonatate (PF‑00345410) mg/kg/day 0 10 30 90 0 5 15 50

‑‑‑‑‑‑‑‑‑‑‑‑‑‑‑‑‑‑‑‑‑‑‑‑‑‑‑‑‑‑‑‑‑‑‑‑‑‑‑‑‑‑‑‑‑‑‑‑‑‑‑‑‑‑‑‑‑‑‑‑‑‑‑‑‑‑‑‑‑‑‑‑‑‑‑‑‑‑‑‑‑‑‑‑‑‑‑‑‑‑‑‑‑‑‑‑‑‑‑‑‑‑‑‑‑‑‑‑

Tissue/ Group/Subgroup/Sex: 1/1/M 2/1/M 3/1/M 4/1/M 1/1/F 2/1/F 3/1/F 4/1/F

Observation Number of Animals:  22  26  19  27  30  27  26  25

‑‑‑‑‑‑‑‑‑‑‑‑‑‑‑‑‑‑‑‑‑‑‑‑‑‑‑‑‑‑‑‑‑‑‑‑‑‑‑‑‑‑‑‑‑‑‑‑‑‑‑‑‑‑‑‑‑‑‑‑‑‑‑‑‑‑‑‑‑‑‑‑‑‑‑‑‑‑‑‑‑‑‑‑‑‑‑‑‑‑‑‑‑‑‑‑‑‑‑‑‑‑‑‑‑‑‑‑

Kidney Number Examined:  22  26  19  27  30  27  26  25

Unremarkable:   9   6   5   4   7   5   6   7

C‑Hematopoietic neoplasm, see

body, whole for type 0 1 0 2 0 0 0 0

Cyst   0   1   0   0   0   1   0   0

Degeneration/necrosis, tubule   0   0   0   0   0   1   0   0

Degeneration/Regeneration, Tubule   1   0   0   0   0   0   0   0

Dilatation, pelvis   3   1   1   4   1   1   3   0

Dilatation, tubule(s)   1   0   0   0   1   1   0   0

Hyaline droplet, tubule cell   0   1   0   1   0   0   0   1

Hyperplasia, transitional cell   3   3   3   4  16  12  12  13

Hyperplasia, tubule cell   0   1   0   0   0   1   0   0

Inflammation, chronic   1   0   0   0   0   0   0   0

Mineralization, pelvis   3   2   2   2  16  15  14  14

M‑Liposarcoma   0   1   0   0   0   0   0   0

Nephropathy, chronic progressive  11  17  13  18  16  14   8  11

Pigment, increased   0   0   0   0   2   1   0   1

Pyelonephritis   3   1   3   4   2   4   3   2

Lacrimal Gland Number Examined:   0   1   2   1   1   0   0   0

Unremarkable:   0   0   0   0   1   0   0   0

Ectopic Harderian gland   0   1   2   1   0   0   0   0

‑‑‑‑‑‑‑‑‑‑‑‑‑‑‑‑‑‑‑‑‑‑‑‑‑‑‑‑‑‑‑‑‑‑‑‑‑‑‑‑‑‑‑‑‑‑‑‑‑‑‑‑‑‑‑‑‑‑‑‑‑‑‑‑‑‑‑‑‑‑‑‑‑‑‑‑‑‑‑‑‑‑‑‑‑‑‑‑‑‑‑‑‑‑‑‑‑‑‑‑‑‑‑‑‑‑‑

Table

Incidence of Microscopic Observations

Unscheduled Euthanasias and Deaths

Test Article (dosage) 1M 2M 3M 4M 1F 2F 3F 4F

‑‑‑‑‑‑‑‑‑‑‑‑‑‑‑‑‑‑‑‑‑‑‑‑‑‑‑ ‑‑‑‑‑‑‑‑ ‑‑ ‑‑ ‑‑ ‑‑ ‑‑ ‑‑ ‑‑ ‑‑

Benzonatate (PF‑00345410) mg/kg/day 0 10 30 90 0 5 15 50

‑‑‑‑‑‑‑‑‑‑‑‑‑‑‑‑‑‑‑‑‑‑‑‑‑‑‑‑‑‑‑‑‑‑‑‑‑‑‑‑‑‑‑‑‑‑‑‑‑‑‑‑‑‑‑‑‑‑‑‑‑‑‑‑‑‑‑‑‑‑‑‑‑‑‑‑‑‑‑‑‑‑‑‑‑‑‑‑‑‑‑‑‑‑‑‑‑‑‑‑‑‑‑‑‑‑‑‑

Tissue/ Group/Subgroup/Sex: 1/1/M 2/1/M 3/1/M 4/1/M 1/1/F 2/1/F 3/1/F 4/1/F

Observation Number of Animals:  22  26  19  27  30  27  26  25

‑‑‑‑‑‑‑‑‑‑‑‑‑‑‑‑‑‑‑‑‑‑‑‑‑‑‑‑‑‑‑‑‑‑‑‑‑‑‑‑‑‑‑‑‑‑‑‑‑‑‑‑‑‑‑‑‑‑‑‑‑‑‑‑‑‑‑‑‑‑‑‑‑‑‑‑‑‑‑‑‑‑‑‑‑‑‑‑‑‑‑‑‑‑‑‑‑‑‑‑‑‑‑‑‑‑‑‑

Liver Number Examined:  22  26  19  27  30  27  26  25

Unremarkable:   4  10   4   4   2   3   2   2

Angiectasis   0   0   1   0   4   1   2   1

B‑Adenoma, hepatocellular   0   0   0   0   0   0   1   0

Barbiturate lysis   0   0   0   1   0   0   0   0

C‑Hematopoietic neoplasm, see

body, whole for type 1 2 0 3 0 0 1 0

Congestion   0   0   0   0   1   0   0   0

Cyst, biliary   0   0   0   1   0   0   0   0

Fibrosis/biliary hyperplasia   5   0   4   4   6   6   6   6

Focus, cellular alteration,

basophilic 6 4 8 12 22 21 20 19

Focus, cellular alteration, clear   0   1   0   0   0   0   0   1

Focus, cellular alteration,

eosinophilic 4 3 4 4 2 2 0 0

Hematocyst   0   0   0   0   0   0   0   1

Hematopoiesis, extramedullary   2   2   0   0   7   3   5   1

Hemorrhage, centrilobular   0   0   1   0   0   0   0   1

Hyperplasia, Kupffer cell   0   0   0   1   0   1   1   1

Infiltrate, mononuclear cell  10   5   9  13   8  12  10  10

Karyomegaly, hepatocyte   0   0   0   0   1   0   2   1

Mitosis, hepatocyte, increased   0   0   0   1   2   2   2   1

Multinucleated hepatocyte,

increased 0 0 0 0 1 0 0 0

Necrosis, hepatocyte   3   3   2   4   2   2   4   0

‑‑‑‑‑‑‑‑‑‑‑‑‑‑‑‑‑‑‑‑‑‑‑‑‑‑‑‑‑‑‑‑‑‑‑‑‑‑‑‑‑‑‑‑‑‑‑‑‑‑‑‑‑‑‑‑‑‑‑‑‑‑‑‑‑‑‑‑‑‑‑‑‑‑‑‑‑‑‑‑‑‑‑‑‑‑‑‑‑‑‑‑‑‑‑‑‑‑‑‑‑‑‑‑‑‑‑

Table

Incidence of Microscopic Observations

Unscheduled Euthanasias and Deaths

Test Article (dosage) 1M 2M 3M 4M 1F 2F 3F 4F

‑‑‑‑‑‑‑‑‑‑‑‑‑‑‑‑‑‑‑‑‑‑‑‑‑‑‑ ‑‑‑‑‑‑‑‑ ‑‑ ‑‑ ‑‑ ‑‑ ‑‑ ‑‑ ‑‑ ‑‑

Benzonatate (PF‑00345410) mg/kg/day 0 10 30 90 0 5 15 50

‑‑‑‑‑‑‑‑‑‑‑‑‑‑‑‑‑‑‑‑‑‑‑‑‑‑‑‑‑‑‑‑‑‑‑‑‑‑‑‑‑‑‑‑‑‑‑‑‑‑‑‑‑‑‑‑‑‑‑‑‑‑‑‑‑‑‑‑‑‑‑‑‑‑‑‑‑‑‑‑‑‑‑‑‑‑‑‑‑‑‑‑‑‑‑‑‑‑‑‑‑‑‑‑‑‑‑‑

Tissue/ Group/Subgroup/Sex: 1/1/M 2/1/M 3/1/M 4/1/M 1/1/F 2/1/F 3/1/F 4/1/F

Observation Number of Animals:  22  26  19  27  30  27  26  25

‑‑‑‑‑‑‑‑‑‑‑‑‑‑‑‑‑‑‑‑‑‑‑‑‑‑‑‑‑‑‑‑‑‑‑‑‑‑‑‑‑‑‑‑‑‑‑‑‑‑‑‑‑‑‑‑‑‑‑‑‑‑‑‑‑‑‑‑‑‑‑‑‑‑‑‑‑‑‑‑‑‑‑‑‑‑‑‑‑‑‑‑‑‑‑‑‑‑‑‑‑‑‑‑‑‑‑‑

Liver Number Examined:  22  26  19  27  30  27  26  25

Unremarkable:   4  10   4   4   2   3   2   2

Necrosis/degeneration,

hepatocyte, centrilobular 1 1 2 1 1 2 1 2

Pigment, increased   1   0   0   0   0   3   0   1

Vacuolation, increased, hepatocyte   3   5   3   4   6   3   1   5

Lung Number Examined:  22  26  19  27  30  27  26  25

Unremarkable:  11  16  11  16  24  19  22  21

C‑Hematopoietic neoplasm, see

body, whole for type 1 2 0 2 0 1 0 1

Granuloma   2   2   1   1   0   0   0   0

Hemorrhage   4   1   1   1   1   0   0   0

Hyperplasia, epithelium, alveolus   3   0   0   0   0   0   0   0

Infiltrate, macrophages, alveolus   2   1   0   2   0   0   0   0

Infiltrate, macrophages,

vacuolated 4 5 5 8 3 5 3 3

Inflammation, acute   0   2   0   0   1   0   0   0

Inflammation, mixed cell   3   1   2   0   0   0   1   0

Leukocytosis   0   0   0   0   0   0   1   0

N‑Atriocaval mesothelioma   0   0   1   0   0   0   0   0

N‑Carcinoma   0   0   0   0   2   2   1   0

Pigment   0   1   0   0   0   0   0   0

Thrombus   0   0   0   0   1   0   0   0

X‑Osteosarcoma, metastatic,

primary unknown 0 0 1 0 0 0 0 0

‑‑‑‑‑‑‑‑‑‑‑‑‑‑‑‑‑‑‑‑‑‑‑‑‑‑‑‑‑‑‑‑‑‑‑‑‑‑‑‑‑‑‑‑‑‑‑‑‑‑‑‑‑‑‑‑‑‑‑‑‑‑‑‑‑‑‑‑‑‑‑‑‑‑‑‑‑‑‑‑‑‑‑‑‑‑‑‑‑‑‑‑‑‑‑‑‑‑‑‑‑‑‑‑‑‑‑

Table

Incidence of Microscopic Observations

Unscheduled Euthanasias and Deaths

Test Article (dosage) 1M 2M 3M 4M 1F 2F 3F 4F

‑‑‑‑‑‑‑‑‑‑‑‑‑‑‑‑‑‑‑‑‑‑‑‑‑‑‑ ‑‑‑‑‑‑‑‑ ‑‑ ‑‑ ‑‑ ‑‑ ‑‑ ‑‑ ‑‑ ‑‑

Benzonatate (PF‑00345410) mg/kg/day 0 10 30 90 0 5 15 50

‑‑‑‑‑‑‑‑‑‑‑‑‑‑‑‑‑‑‑‑‑‑‑‑‑‑‑‑‑‑‑‑‑‑‑‑‑‑‑‑‑‑‑‑‑‑‑‑‑‑‑‑‑‑‑‑‑‑‑‑‑‑‑‑‑‑‑‑‑‑‑‑‑‑‑‑‑‑‑‑‑‑‑‑‑‑‑‑‑‑‑‑‑‑‑‑‑‑‑‑‑‑‑‑‑‑‑‑

Tissue/ Group/Subgroup/Sex: 1/1/M 2/1/M 3/1/M 4/1/M 1/1/F 2/1/F 3/1/F 4/1/F

Observation Number of Animals:  22  26  19  27  30  27  26  25

‑‑‑‑‑‑‑‑‑‑‑‑‑‑‑‑‑‑‑‑‑‑‑‑‑‑‑‑‑‑‑‑‑‑‑‑‑‑‑‑‑‑‑‑‑‑‑‑‑‑‑‑‑‑‑‑‑‑‑‑‑‑‑‑‑‑‑‑‑‑‑‑‑‑‑‑‑‑‑‑‑‑‑‑‑‑‑‑‑‑‑‑‑‑‑‑‑‑‑‑‑‑‑‑‑‑‑‑

Lymph Node,

Inguinal Number Examined: 16 21 12 23 27 22 18 21

Unremarkable: 15 19 12 22 25 20 17 18

C‑Hematopoietic neoplasm, see

body, whole for type 1 0 0 0 0 0 1 0

Erythrocytes, sinus   0   0   0   0   0   0   0   1

Hyperplasia, lymphocytes   0   2   0   1   2   2   0   1

N‑Carcinoma   0   0   0   0   0   0   0   1

Lymph Node,

Mesenteric Number Examined: 22 26 19 27 30 27 26 25

Unremarkable: 19 21 16 20 27 23 26 24

C‑Hematopoietic neoplasm, see

body, whole for type 1 1 1 1 0 0 0 0

C‑Vascular neoplasm, see body,

whole for type 0 3 2 3 1 1 0 0

Dilatation, sinus   0   1   0   0   0   0   0   0

Erythrocytes, sinus, increased   1   0   0   3   2   1   0   1

Hyperplasia, lymphocytes   1   0   0   0   1   1   0   0

Necrosis, lymphocytes   0   0   0   0   1   1   0   0

N‑Sarcoma   0   0   0   1   0   0   0   0

‑‑‑‑‑‑‑‑‑‑‑‑‑‑‑‑‑‑‑‑‑‑‑‑‑‑‑‑‑‑‑‑‑‑‑‑‑‑‑‑‑‑‑‑‑‑‑‑‑‑‑‑‑‑‑‑‑‑‑‑‑‑‑‑‑‑‑‑‑‑‑‑‑‑‑‑‑‑‑‑‑‑‑‑‑‑‑‑‑‑‑‑‑‑‑‑‑‑‑‑‑‑‑‑‑‑‑

Table

Incidence of Microscopic Observations

Unscheduled Euthanasias and Deaths

Test Article (dosage) 1M 2M 3M 4M 1F 2F 3F 4F

‑‑‑‑‑‑‑‑‑‑‑‑‑‑‑‑‑‑‑‑‑‑‑‑‑‑‑ ‑‑‑‑‑‑‑‑ ‑‑ ‑‑ ‑‑ ‑‑ ‑‑ ‑‑ ‑‑ ‑‑

Benzonatate (PF‑00345410) mg/kg/day 0 10 30 90 0 5 15 50

‑‑‑‑‑‑‑‑‑‑‑‑‑‑‑‑‑‑‑‑‑‑‑‑‑‑‑‑‑‑‑‑‑‑‑‑‑‑‑‑‑‑‑‑‑‑‑‑‑‑‑‑‑‑‑‑‑‑‑‑‑‑‑‑‑‑‑‑‑‑‑‑‑‑‑‑‑‑‑‑‑‑‑‑‑‑‑‑‑‑‑‑‑‑‑‑‑‑‑‑‑‑‑‑‑‑‑‑

Tissue/ Group/Subgroup/Sex: 1/1/M 2/1/M 3/1/M 4/1/M 1/1/F 2/1/F 3/1/F 4/1/F

Observation Number of Animals:  22  26  19  27  30  27  26  25

‑‑‑‑‑‑‑‑‑‑‑‑‑‑‑‑‑‑‑‑‑‑‑‑‑‑‑‑‑‑‑‑‑‑‑‑‑‑‑‑‑‑‑‑‑‑‑‑‑‑‑‑‑‑‑‑‑‑‑‑‑‑‑‑‑‑‑‑‑‑‑‑‑‑‑‑‑‑‑‑‑‑‑‑‑‑‑‑‑‑‑‑‑‑‑‑‑‑‑‑‑‑‑‑‑‑‑‑

Lymph Node, Other Number Examined:   2   1   2   3   0   1   0   3

Unremarkable:   0   0   0   0   0   0   0   0

Abscess   0   0   0   0   0   0   0   1

C‑Hematopoietic neoplasm, see

body, whole for type 1 0 0 1 0 0 0 0

Erythrocytes, sinus, increased   2   1   0   1   0   1   0   2

Hyperplasia, lymphocytes   0   0   1   1   0   0   0   1

Infiltrate, neutrophils   0   0   0   0   0   0   0   1

N‑Atriocaval mesothelioma   0   0   1   0   0   0   0   0

N‑Sarcoma   0   0   0   1   0   0   0   0

Pigment   0   0   0   0   0   1   0   0

Mammary Gland Number Examined:  22  24  17  21  30  27  26  24

Unremarkable:  20  24  16  18  10   8  11   7

Abscess   0   0   0   0   1   0   0   0

B‑Adenoma   0   0   0   0   1   0   1   2

B‑Fibroadenoma   1   0   0   0   2   7   4   2

Cyst/ectasia with inflammation   1   0   1   3  16  14  14  13

Granuloma   0   0   0   0   1   0   0   0

Hyperplasia   0   0   0   1  13  11  10  10

M‑Carcinoma   0   0   0   0   6   6   5   8

‑‑‑‑‑‑‑‑‑‑‑‑‑‑‑‑‑‑‑‑‑‑‑‑‑‑‑‑‑‑‑‑‑‑‑‑‑‑‑‑‑‑‑‑‑‑‑‑‑‑‑‑‑‑‑‑‑‑‑‑‑‑‑‑‑‑‑‑‑‑‑‑‑‑‑‑‑‑‑‑‑‑‑‑‑‑‑‑‑‑‑‑‑‑‑‑‑‑‑‑‑‑‑‑‑‑‑

Table

Incidence of Microscopic Observations

Unscheduled Euthanasias and Deaths

Test Article (dosage) 1M 2M 3M 4M 1F 2F 3F 4F

‑‑‑‑‑‑‑‑‑‑‑‑‑‑‑‑‑‑‑‑‑‑‑‑‑‑‑ ‑‑‑‑‑‑‑‑ ‑‑ ‑‑ ‑‑ ‑‑ ‑‑ ‑‑ ‑‑ ‑‑

Benzonatate (PF‑00345410) mg/kg/day 0 10 30 90 0 5 15 50

‑‑‑‑‑‑‑‑‑‑‑‑‑‑‑‑‑‑‑‑‑‑‑‑‑‑‑‑‑‑‑‑‑‑‑‑‑‑‑‑‑‑‑‑‑‑‑‑‑‑‑‑‑‑‑‑‑‑‑‑‑‑‑‑‑‑‑‑‑‑‑‑‑‑‑‑‑‑‑‑‑‑‑‑‑‑‑‑‑‑‑‑‑‑‑‑‑‑‑‑‑‑‑‑‑‑‑‑

Tissue/ Group/Subgroup/Sex: 1/1/M 2/1/M 3/1/M 4/1/M 1/1/F 2/1/F 3/1/F 4/1/F

Observation Number of Animals:  22  26  19  27  30  27  26  25

‑‑‑‑‑‑‑‑‑‑‑‑‑‑‑‑‑‑‑‑‑‑‑‑‑‑‑‑‑‑‑‑‑‑‑‑‑‑‑‑‑‑‑‑‑‑‑‑‑‑‑‑‑‑‑‑‑‑‑‑‑‑‑‑‑‑‑‑‑‑‑‑‑‑‑‑‑‑‑‑‑‑‑‑‑‑‑‑‑‑‑‑‑‑‑‑‑‑‑‑‑‑‑‑‑‑‑‑

Mandibular

Salivary Gland Number Examined: 22 26 19 27 30 27 26 25

Unremarkable: 22 26 19 26 30 26 26 25

Inflammation, chronic‑active   0   0   0   0   0   1   0   0

M‑Carcinoma   0   0   0   1   0   0   0   0

Marrow, Sternum Number Examined:  22  26  19  27  30  27  26  25

Unremarkable:  15  18  16  16  19  19  18  19

C‑Hematopoietic neoplasm, see

body, whole for type 1 0 0 1 0 0 0 0

Hyperplasia, erythroid   0   0   0   1   1   1   0   0

Hyperplasia, myeloid   6   8   3   9  10   7   8   6

Mesentery Number Examined:   0   0   0   0   1   0   0   0

Unremarkable:   0   0   0   0   0   0   0   0

Hemorrhage   0   0   0   0   1   0   0   0

Muscle, Biceps

Femoris Number Examined: 22 26 19 27 30 27 26 25

Unremarkable: 21 23 17 24 30 25 22 24

Degeneration/regeneration   1   3   2   3   0   2   4   1

‑‑‑‑‑‑‑‑‑‑‑‑‑‑‑‑‑‑‑‑‑‑‑‑‑‑‑‑‑‑‑‑‑‑‑‑‑‑‑‑‑‑‑‑‑‑‑‑‑‑‑‑‑‑‑‑‑‑‑‑‑‑‑‑‑‑‑‑‑‑‑‑‑‑‑‑‑‑‑‑‑‑‑‑‑‑‑‑‑‑‑‑‑‑‑‑‑‑‑‑‑‑‑‑‑‑‑

Table

Incidence of Microscopic Observations

Unscheduled Euthanasias and Deaths

Test Article (dosage) 1M 2M 3M 4M 1F 2F 3F 4F

‑‑‑‑‑‑‑‑‑‑‑‑‑‑‑‑‑‑‑‑‑‑‑‑‑‑‑ ‑‑‑‑‑‑‑‑ ‑‑ ‑‑ ‑‑ ‑‑ ‑‑ ‑‑ ‑‑ ‑‑

Benzonatate (PF‑00345410) mg/kg/day 0 10 30 90 0 5 15 50

‑‑‑‑‑‑‑‑‑‑‑‑‑‑‑‑‑‑‑‑‑‑‑‑‑‑‑‑‑‑‑‑‑‑‑‑‑‑‑‑‑‑‑‑‑‑‑‑‑‑‑‑‑‑‑‑‑‑‑‑‑‑‑‑‑‑‑‑‑‑‑‑‑‑‑‑‑‑‑‑‑‑‑‑‑‑‑‑‑‑‑‑‑‑‑‑‑‑‑‑‑‑‑‑‑‑‑‑

Tissue/ Group/Subgroup/Sex: 1/1/M 2/1/M 3/1/M 4/1/M 1/1/F 2/1/F 3/1/F 4/1/F

Observation Number of Animals:  22  26  19  27  30  27  26  25

‑‑‑‑‑‑‑‑‑‑‑‑‑‑‑‑‑‑‑‑‑‑‑‑‑‑‑‑‑‑‑‑‑‑‑‑‑‑‑‑‑‑‑‑‑‑‑‑‑‑‑‑‑‑‑‑‑‑‑‑‑‑‑‑‑‑‑‑‑‑‑‑‑‑‑‑‑‑‑‑‑‑‑‑‑‑‑‑‑‑‑‑‑‑‑‑‑‑‑‑‑‑‑‑‑‑‑‑

Muscle, Other Number Examined:   0   0   0   0   0   0   1   0

Unremarkable:   0   0   0   0   0   0   0   0

C‑Hematopoietic neoplasm, see

body, whole for type 0 0 0 0 0 0 1 0

Nasal Turbinate Number Examined:  22  26  19  27  29  27  25  25

Unremarkable:  21  25  19  26  29  27  23  25

Exudate, lumen   1   1   0   0   0   0   0   0

Inflammation   0   0   0   1   0   0   1   0

M‑Carcinoma, squamous cell   0   0   0   0   0   0   1   0

Nerve, Sciatic Number Examined:  22  26  19  27  30  27  26  25

Unremarkable:  22  26  19  26  30  27  26  25

Degeneration, axon, increased   0   0   0   1   0   0   0   0

Ovary Number Examined:   0   0   0   0  30  27  26  25

Unremarkable:   0   0   0   0  24  17  20  22

B‑Granulosa/theca cell tumor   0   0   0   0   0   0   0   1

C‑Vascular neoplasm, see body,

whole for type 0 0 0 0 0 1 0 0

Cyst, bursa   0   0   0   0   1   3   0   0

Cyst, corpus luteum   0   0   0   0   0   0   1   0

Cyst, parovarian   0   0   0   0   3   3   0   1

Hyperplasia, interstitial cell   0   0   0   0   2   3   4   2

N‑Carcinoma   0   0   0   0   0   0   1   1

‑‑‑‑‑‑‑‑‑‑‑‑‑‑‑‑‑‑‑‑‑‑‑‑‑‑‑‑‑‑‑‑‑‑‑‑‑‑‑‑‑‑‑‑‑‑‑‑‑‑‑‑‑‑‑‑‑‑‑‑‑‑‑‑‑‑‑‑‑‑‑‑‑‑‑‑‑‑‑‑‑‑‑‑‑‑‑‑‑‑‑‑‑‑‑‑‑‑‑‑‑‑‑‑‑‑‑

Table

Incidence of Microscopic Observations

Unscheduled Euthanasias and Deaths

Test Article (dosage) 1M 2M 3M 4M 1F 2F 3F 4F

‑‑‑‑‑‑‑‑‑‑‑‑‑‑‑‑‑‑‑‑‑‑‑‑‑‑‑ ‑‑‑‑‑‑‑‑ ‑‑ ‑‑ ‑‑ ‑‑ ‑‑ ‑‑ ‑‑ ‑‑

Benzonatate (PF‑00345410) mg/kg/day 0 10 30 90 0 5 15 50

‑‑‑‑‑‑‑‑‑‑‑‑‑‑‑‑‑‑‑‑‑‑‑‑‑‑‑‑‑‑‑‑‑‑‑‑‑‑‑‑‑‑‑‑‑‑‑‑‑‑‑‑‑‑‑‑‑‑‑‑‑‑‑‑‑‑‑‑‑‑‑‑‑‑‑‑‑‑‑‑‑‑‑‑‑‑‑‑‑‑‑‑‑‑‑‑‑‑‑‑‑‑‑‑‑‑‑‑

Tissue/ Group/Subgroup/Sex: 1/1/M 2/1/M 3/1/M 4/1/M 1/1/F 2/1/F 3/1/F 4/1/F

Observation Number of Animals:  22  26  19  27  30  27  26  25

‑‑‑‑‑‑‑‑‑‑‑‑‑‑‑‑‑‑‑‑‑‑‑‑‑‑‑‑‑‑‑‑‑‑‑‑‑‑‑‑‑‑‑‑‑‑‑‑‑‑‑‑‑‑‑‑‑‑‑‑‑‑‑‑‑‑‑‑‑‑‑‑‑‑‑‑‑‑‑‑‑‑‑‑‑‑‑‑‑‑‑‑‑‑‑‑‑‑‑‑‑‑‑‑‑‑‑‑

Pancreas Number Examined:  22  26  19  27  30  27  26  25

Unremarkable:   5   8   1   8  13  12  14  16

Alteration, basophilic   2   0   2   1   1   0   2   1

Atrophy, acinar   3   1   0   2   1   2   1   1

B‑Adenoma, islet cell   0   1   1   0   0   0   1   0

C‑Hematopoietic neoplasm, see

body, whole for type 0 0 0 1 1 0 0 1

C‑Vascular neoplasm, see body,

whole for type 0 0 0 1 0 0 0 0

Depletion, zymogen   1   1   2   0   2   1   1   0

Hyperplasia, acinar cell   0   0   0   2   0   0   0   0

Hyperplasia, islet cell  15  17  17  16   9  11   6   6

Infiltrate, mononuclear cell   1   3   2   3   2   3   3   1

Inflammation, chronic   2   1   1   4   3   2   0   2

N‑Carcinoma   0   0   0   0   1   0   1   1

N‑Sarcoma   0   0   0   1   0   0   0   0

Parathyroid Number Examined:  21  25  19  25  29  27  26  24

Unremarkable:  21  23  18  24  27  27  26  24

B‑Adenoma   0   0   0   0   1   0   0   0

Hyperplasia   0   2   1   1   2   0   0   0

‑‑‑‑‑‑‑‑‑‑‑‑‑‑‑‑‑‑‑‑‑‑‑‑‑‑‑‑‑‑‑‑‑‑‑‑‑‑‑‑‑‑‑‑‑‑‑‑‑‑‑‑‑‑‑‑‑‑‑‑‑‑‑‑‑‑‑‑‑‑‑‑‑‑‑‑‑‑‑‑‑‑‑‑‑‑‑‑‑‑‑‑‑‑‑‑‑‑‑‑‑‑‑‑‑‑‑

Table

Incidence of Microscopic Observations

Unscheduled Euthanasias and Deaths

Test Article (dosage) 1M 2M 3M 4M 1F 2F 3F 4F

‑‑‑‑‑‑‑‑‑‑‑‑‑‑‑‑‑‑‑‑‑‑‑‑‑‑‑ ‑‑‑‑‑‑‑‑ ‑‑ ‑‑ ‑‑ ‑‑ ‑‑ ‑‑ ‑‑ ‑‑

Benzonatate (PF‑00345410) mg/kg/day 0 10 30 90 0 5 15 50

‑‑‑‑‑‑‑‑‑‑‑‑‑‑‑‑‑‑‑‑‑‑‑‑‑‑‑‑‑‑‑‑‑‑‑‑‑‑‑‑‑‑‑‑‑‑‑‑‑‑‑‑‑‑‑‑‑‑‑‑‑‑‑‑‑‑‑‑‑‑‑‑‑‑‑‑‑‑‑‑‑‑‑‑‑‑‑‑‑‑‑‑‑‑‑‑‑‑‑‑‑‑‑‑‑‑‑‑

Tissue/ Group/Subgroup/Sex: 1/1/M 2/1/M 3/1/M 4/1/M 1/1/F 2/1/F 3/1/F 4/1/F

Observation Number of Animals:  22  26  19  27  30  27  26  25

‑‑‑‑‑‑‑‑‑‑‑‑‑‑‑‑‑‑‑‑‑‑‑‑‑‑‑‑‑‑‑‑‑‑‑‑‑‑‑‑‑‑‑‑‑‑‑‑‑‑‑‑‑‑‑‑‑‑‑‑‑‑‑‑‑‑‑‑‑‑‑‑‑‑‑‑‑‑‑‑‑‑‑‑‑‑‑‑‑‑‑‑‑‑‑‑‑‑‑‑‑‑‑‑‑‑‑‑

Pituitary Number Examined:  21  26  19  27  30  27  26  25

Unremarkable:   8   9   9  14   3   6   6   7

B‑Adenoma   9  15   9  10  23  20  19  15

Cyst, craniopharyngeal   0   0   0   1   0   0   0   0

Hematopoiesis, increased   0   0   0   0   0   0   0   1

Hemorrhage   0   0   0   0   0   0   0   1

Hyperplasia   3   2   1   2   5   2   1   0

Hyperplasia, erythroid   0   0   0   0   0   0   0   1

I‑Sarcoma   1   0   0   0   0   0   0   0

M‑Carcinoma   0   0   0   0   1   0   0   1

Preputial Gland Number Examined:   0   0   2   0   0   0   0   0

Unremarkable:   0   0   0   0   0   0   0   0

Ectasia   0   0   1   0   0   0   0   0

Inflammation, chronic‑active   0   0   2   0   0   0   0   0

Prostate Number Examined:  22  26  19  27   0   0   0   0

Unremarkable:   9  15   7  14   0   0   0   0

Hyperplasia   0   1   1   2   0   0   0   0

Inflammation, chronic‑active  12  10  12  13   0   0   0   0

M‑Carcinoma   1   0   0   0   0   0   0   0

Seminal Vesicle Number Examined:  22  26  19  27   0   0   0   0

Unremarkable:  19  22  18  24   0   0   0   0

Decreased secretion   3   3   1   3   0   0   0   0

Inflammation, chronic‑active   0   1   0   0   0   0   0   0

‑‑‑‑‑‑‑‑‑‑‑‑‑‑‑‑‑‑‑‑‑‑‑‑‑‑‑‑‑‑‑‑‑‑‑‑‑‑‑‑‑‑‑‑‑‑‑‑‑‑‑‑‑‑‑‑‑‑‑‑‑‑‑‑‑‑‑‑‑‑‑‑‑‑‑‑‑‑‑‑‑‑‑‑‑‑‑‑‑‑‑‑‑‑‑‑‑‑‑‑‑‑‑‑‑‑‑

Table

Incidence of Microscopic Observations

Unscheduled Euthanasias and Deaths

Test Article (dosage) 1M 2M 3M 4M 1F 2F 3F 4F

‑‑‑‑‑‑‑‑‑‑‑‑‑‑‑‑‑‑‑‑‑‑‑‑‑‑‑ ‑‑‑‑‑‑‑‑ ‑‑ ‑‑ ‑‑ ‑‑ ‑‑ ‑‑ ‑‑ ‑‑

Benzonatate (PF‑00345410) mg/kg/day 0 10 30 90 0 5 15 50

‑‑‑‑‑‑‑‑‑‑‑‑‑‑‑‑‑‑‑‑‑‑‑‑‑‑‑‑‑‑‑‑‑‑‑‑‑‑‑‑‑‑‑‑‑‑‑‑‑‑‑‑‑‑‑‑‑‑‑‑‑‑‑‑‑‑‑‑‑‑‑‑‑‑‑‑‑‑‑‑‑‑‑‑‑‑‑‑‑‑‑‑‑‑‑‑‑‑‑‑‑‑‑‑‑‑‑‑

Tissue/ Group/Subgroup/Sex: 1/1/M 2/1/M 3/1/M 4/1/M 1/1/F 2/1/F 3/1/F 4/1/F

Observation Number of Animals:  22  26  19  27  30  27  26  25

‑‑‑‑‑‑‑‑‑‑‑‑‑‑‑‑‑‑‑‑‑‑‑‑‑‑‑‑‑‑‑‑‑‑‑‑‑‑‑‑‑‑‑‑‑‑‑‑‑‑‑‑‑‑‑‑‑‑‑‑‑‑‑‑‑‑‑‑‑‑‑‑‑‑‑‑‑‑‑‑‑‑‑‑‑‑‑‑‑‑‑‑‑‑‑‑‑‑‑‑‑‑‑‑‑‑‑‑

Skin/Subcutis Number Examined:  22  26  19  27  30  27  26  24

Unremarkable:  16  18  15  17  24  23  22  21

B‑Basal cell tumor   1   1   0   0   1   0   0   0

B‑Fibroma   1   2   2   0   0   0   0   0

B‑Keratoacanthoma   0   0   0   1   1   0   0   0

B‑Myxoma   0   0   0   0   0   0   1   0

B‑Papilloma, squamous cell   0   0   0   1   0   0   0   0

B‑Trichoepithelioma   0   1   0   1   0   0   0   0

C‑Hematopoietic neoplasm, see

body, whole for type 0 2 0 0 1 1 0 1

C‑Vascular neoplasm, see body,

whole for type 1 0 0 1 0 0 0 0

Cyst, epidermal inclusion   0   0   0   0   0   1   0   0

Erosion/ulcer   1   2   1   1   0   1   1   2

Hemorrhage   0   0   0   0   1   0   0   0

Inflammation, chronic‑active   2   2   1   2   1   2   2   2

M‑Carcinoma   0   0   0   1   0   0   0   0

M‑Carcinoma, squamous cell   0   0   0   1   0   0   0   0

M‑Fibrosarcoma   0   1   0   2   0   0   1   0

M‑Malignant schwannoma   0   0   1   0   1   1   0   0

M‑Sarcoma   1   0   0   0   0   0   0   0

‑‑‑‑‑‑‑‑‑‑‑‑‑‑‑‑‑‑‑‑‑‑‑‑‑‑‑‑‑‑‑‑‑‑‑‑‑‑‑‑‑‑‑‑‑‑‑‑‑‑‑‑‑‑‑‑‑‑‑‑‑‑‑‑‑‑‑‑‑‑‑‑‑‑‑‑‑‑‑‑‑‑‑‑‑‑‑‑‑‑‑‑‑‑‑‑‑‑‑‑‑‑‑‑‑‑‑

Table

Incidence of Microscopic Observations

Unscheduled Euthanasias and Deaths

Test Article (dosage) 1M 2M 3M 4M 1F 2F 3F 4F

‑‑‑‑‑‑‑‑‑‑‑‑‑‑‑‑‑‑‑‑‑‑‑‑‑‑‑ ‑‑‑‑‑‑‑‑ ‑‑ ‑‑ ‑‑ ‑‑ ‑‑ ‑‑ ‑‑ ‑‑

Benzonatate (PF‑00345410) mg/kg/day 0 10 30 90 0 5 15 50

‑‑‑‑‑‑‑‑‑‑‑‑‑‑‑‑‑‑‑‑‑‑‑‑‑‑‑‑‑‑‑‑‑‑‑‑‑‑‑‑‑‑‑‑‑‑‑‑‑‑‑‑‑‑‑‑‑‑‑‑‑‑‑‑‑‑‑‑‑‑‑‑‑‑‑‑‑‑‑‑‑‑‑‑‑‑‑‑‑‑‑‑‑‑‑‑‑‑‑‑‑‑‑‑‑‑‑‑

Tissue/ Group/Subgroup/Sex: 1/1/M 2/1/M 3/1/M 4/1/M 1/1/F 2/1/F 3/1/F 4/1/F

Observation Number of Animals:  22  26  19  27  30  27  26  25

‑‑‑‑‑‑‑‑‑‑‑‑‑‑‑‑‑‑‑‑‑‑‑‑‑‑‑‑‑‑‑‑‑‑‑‑‑‑‑‑‑‑‑‑‑‑‑‑‑‑‑‑‑‑‑‑‑‑‑‑‑‑‑‑‑‑‑‑‑‑‑‑‑‑‑‑‑‑‑‑‑‑‑‑‑‑‑‑‑‑‑‑‑‑‑‑‑‑‑‑‑‑‑‑‑‑‑‑

Spinal Cord Number Examined:  22  26  19  27  30  27  26  25

Unremarkable:  17  20  15  23  28  23  25  23

B‑Meningioma   0   1   0   0   0   0   0   0

Degeneration, axon, increased   4   6   4   3   2   4   1   2

Gliosis   0   0   0   1   0   0   0   0

Hemorrhage   1   0   0   0   0   0   0   0

Malacia   1   0   0   0   0   0   0   0

Spleen Number Examined:  22  26  19  27  30  27  26  25

Unremarkable:  10  16   7  13  11   9   9  10

C‑Hematopoietic neoplasm, see

body, whole for type 1 2 0 1 0 0 0 0

Fibrosis, capsule   0   0   1   1   0   0   0   0

Hematopoiesis, extramedullary,

increased 10 9 10 13 14 13 15 11

Pigment, increased   1   1   0   0   5   5   2   4

Thrombus   0   0   1   0   0   0   0   0

X‑Osteosarcoma, metastatic,

primary unknown 0 0 1 0 0 0 0 0

‑‑‑‑‑‑‑‑‑‑‑‑‑‑‑‑‑‑‑‑‑‑‑‑‑‑‑‑‑‑‑‑‑‑‑‑‑‑‑‑‑‑‑‑‑‑‑‑‑‑‑‑‑‑‑‑‑‑‑‑‑‑‑‑‑‑‑‑‑‑‑‑‑‑‑‑‑‑‑‑‑‑‑‑‑‑‑‑‑‑‑‑‑‑‑‑‑‑‑‑‑‑‑‑‑‑‑

Table

Incidence of Microscopic Observations

Unscheduled Euthanasias and Deaths

Test Article (dosage) 1M 2M 3M 4M 1F 2F 3F 4F

‑‑‑‑‑‑‑‑‑‑‑‑‑‑‑‑‑‑‑‑‑‑‑‑‑‑‑ ‑‑‑‑‑‑‑‑ ‑‑ ‑‑ ‑‑ ‑‑ ‑‑ ‑‑ ‑‑ ‑‑

Benzonatate (PF‑00345410) mg/kg/day 0 10 30 90 0 5 15 50

‑‑‑‑‑‑‑‑‑‑‑‑‑‑‑‑‑‑‑‑‑‑‑‑‑‑‑‑‑‑‑‑‑‑‑‑‑‑‑‑‑‑‑‑‑‑‑‑‑‑‑‑‑‑‑‑‑‑‑‑‑‑‑‑‑‑‑‑‑‑‑‑‑‑‑‑‑‑‑‑‑‑‑‑‑‑‑‑‑‑‑‑‑‑‑‑‑‑‑‑‑‑‑‑‑‑‑‑

Tissue/ Group/Subgroup/Sex: 1/1/M 2/1/M 3/1/M 4/1/M 1/1/F 2/1/F 3/1/F 4/1/F

Observation Number of Animals:  22  26  19  27  30  27  26  25

‑‑‑‑‑‑‑‑‑‑‑‑‑‑‑‑‑‑‑‑‑‑‑‑‑‑‑‑‑‑‑‑‑‑‑‑‑‑‑‑‑‑‑‑‑‑‑‑‑‑‑‑‑‑‑‑‑‑‑‑‑‑‑‑‑‑‑‑‑‑‑‑‑‑‑‑‑‑‑‑‑‑‑‑‑‑‑‑‑‑‑‑‑‑‑‑‑‑‑‑‑‑‑‑‑‑‑‑

Stomach, Glandular Number Examined:  22  25  19  27  30  27  26  25

Unremarkable:  21  24  18  25  30  26  25  24

Cyst, squamous cell   0   0   0   1   0   0   0   0

Erosion/ulcer   0   1   1   1   0   0   0   1

Inflammation, chronic‑active   0   0   0   0   0   1   0   0

Inflammation, granulomatous   0   0   0   1   0   0   0   0

M‑Carcinoma   1   0   0   0   0   0   0   0

N‑Carcinoma   0   0   0   0   0   0   1   0

Stomach,

Nonglandular Number Examined: 22 25 19 27 30 27 26 25

Unremarkable: 19 23 18 25 27 24 24 22

Cyst   0   0   0   0   0   0   2   0

Hyperplasia, epithelium   2   1   0   1   2   1   1   0

Inflammation, chronic‑active   3   2   0   2   2   3   0   2

Ulcer/erosion   3   2   1   1   2   2   0   2

Sublingual

Salivary Gland Number Examined: 0 0 1 0 0 0 0 0

Unremarkable: 0 0 0 0 0 0 0 0

Hyperplasia   0   0   1   0   0   0   0   0

Tail Number Examined:   0   1   0   0   0   0   0   0

Unremarkable:   0   0   0   0   0   0   0   0

M‑Rhabdomyosarcoma (muscle tumor)   0   1   0   0   0   0   0   0

‑‑‑‑‑‑‑‑‑‑‑‑‑‑‑‑‑‑‑‑‑‑‑‑‑‑‑‑‑‑‑‑‑‑‑‑‑‑‑‑‑‑‑‑‑‑‑‑‑‑‑‑‑‑‑‑‑‑‑‑‑‑‑‑‑‑‑‑‑‑‑‑‑‑‑‑‑‑‑‑‑‑‑‑‑‑‑‑‑‑‑‑‑‑‑‑‑‑‑‑‑‑‑‑‑‑‑

Table

Incidence of Microscopic Observations

Unscheduled Euthanasias and Deaths

Test Article (dosage) 1M 2M 3M 4M 1F 2F 3F 4F

‑‑‑‑‑‑‑‑‑‑‑‑‑‑‑‑‑‑‑‑‑‑‑‑‑‑‑ ‑‑‑‑‑‑‑‑ ‑‑ ‑‑ ‑‑ ‑‑ ‑‑ ‑‑ ‑‑ ‑‑

Benzonatate (PF‑00345410) mg/kg/day 0 10 30 90 0 5 15 50

‑‑‑‑‑‑‑‑‑‑‑‑‑‑‑‑‑‑‑‑‑‑‑‑‑‑‑‑‑‑‑‑‑‑‑‑‑‑‑‑‑‑‑‑‑‑‑‑‑‑‑‑‑‑‑‑‑‑‑‑‑‑‑‑‑‑‑‑‑‑‑‑‑‑‑‑‑‑‑‑‑‑‑‑‑‑‑‑‑‑‑‑‑‑‑‑‑‑‑‑‑‑‑‑‑‑‑‑

Tissue/ Group/Subgroup/Sex: 1/1/M 2/1/M 3/1/M 4/1/M 1/1/F 2/1/F 3/1/F 4/1/F

Observation Number of Animals:  22  26  19  27  30  27  26  25

‑‑‑‑‑‑‑‑‑‑‑‑‑‑‑‑‑‑‑‑‑‑‑‑‑‑‑‑‑‑‑‑‑‑‑‑‑‑‑‑‑‑‑‑‑‑‑‑‑‑‑‑‑‑‑‑‑‑‑‑‑‑‑‑‑‑‑‑‑‑‑‑‑‑‑‑‑‑‑‑‑‑‑‑‑‑‑‑‑‑‑‑‑‑‑‑‑‑‑‑‑‑‑‑‑‑‑‑

Testis Number Examined:  22  26  19  27   0   0   0   0

Unremarkable:  16  23  18  27   0   0   0   0

Atrophy/degeneration   4   2   0   0   0   0   0   0

B‑Interstitial cell tumor   0   2   1   0   0   0   0   0

Edema   1   0   0   0   0   0   0   0

Granuloma, sperm   1   0   0   0   0   0   0   0

Thoracic Cavity Number Examined:   0   0   1   0   0   0   0   0

Unremarkable:   0   0   0   0   0   0   0   0

N‑Atriocaval mesothelioma   0   0   1   0   0   0   0   0

Thymus Number Examined:  22  25  19  27  30  24  26  23

Unremarkable:  17  19  16  25  24  18  19  21

B‑Thymoma   0   0   0   0   0   1   1   0

C‑Hematopoietic neoplasm, see

body, whole for type 2 2 1 2 0 0 2 0

C‑Vascular neoplasm, see body,

whole for type 0 0 0 0 0 1 0 0

Hematopoiesis, extramedullary   0   0   0   0   0   0   1   0

Hemorrhage   3   3   2   0   1   0   0   2

Hyperplasia, epithelium   1   2   0   0   3   3   1   0

Hyperplasia, lymphocyte   0   1   0   0   3   2   1   0

Inflammation, chronic‑active   0   0   0   0   1   0   0   0

Necrosis, lymphocytes   0   1   0   0   1   1   2   1

‑‑‑‑‑‑‑‑‑‑‑‑‑‑‑‑‑‑‑‑‑‑‑‑‑‑‑‑‑‑‑‑‑‑‑‑‑‑‑‑‑‑‑‑‑‑‑‑‑‑‑‑‑‑‑‑‑‑‑‑‑‑‑‑‑‑‑‑‑‑‑‑‑‑‑‑‑‑‑‑‑‑‑‑‑‑‑‑‑‑‑‑‑‑‑‑‑‑‑‑‑‑‑‑‑‑‑

Table

Incidence of Microscopic Observations

Unscheduled Euthanasias and Deaths

Test Article (dosage) 1M 2M 3M 4M 1F 2F 3F 4F

‑‑‑‑‑‑‑‑‑‑‑‑‑‑‑‑‑‑‑‑‑‑‑‑‑‑‑ ‑‑‑‑‑‑‑‑ ‑‑ ‑‑ ‑‑ ‑‑ ‑‑ ‑‑ ‑‑ ‑‑

Benzonatate (PF‑00345410) mg/kg/day 0 10 30 90 0 5 15 50

‑‑‑‑‑‑‑‑‑‑‑‑‑‑‑‑‑‑‑‑‑‑‑‑‑‑‑‑‑‑‑‑‑‑‑‑‑‑‑‑‑‑‑‑‑‑‑‑‑‑‑‑‑‑‑‑‑‑‑‑‑‑‑‑‑‑‑‑‑‑‑‑‑‑‑‑‑‑‑‑‑‑‑‑‑‑‑‑‑‑‑‑‑‑‑‑‑‑‑‑‑‑‑‑‑‑‑‑

Tissue/ Group/Subgroup/Sex: 1/1/M 2/1/M 3/1/M 4/1/M 1/1/F 2/1/F 3/1/F 4/1/F

Observation Number of Animals:  22  26  19  27  30  27  26  25

‑‑‑‑‑‑‑‑‑‑‑‑‑‑‑‑‑‑‑‑‑‑‑‑‑‑‑‑‑‑‑‑‑‑‑‑‑‑‑‑‑‑‑‑‑‑‑‑‑‑‑‑‑‑‑‑‑‑‑‑‑‑‑‑‑‑‑‑‑‑‑‑‑‑‑‑‑‑‑‑‑‑‑‑‑‑‑‑‑‑‑‑‑‑‑‑‑‑‑‑‑‑‑‑‑‑‑‑

Thyroid Number Examined:  22  26  19  27  30  27  26  25

Unremarkable:   6   4   1   3   4   7   2   8

B‑Adenoma, C‑cell   2   2   1   2   2   6   6   1

B‑Adenoma, follicular cell   0   6   3   5   1   1   1   1

Cyst, follicle   2   1   2   0   3   2   2   1

Hyperplasia, diffuse, C‑cell  14  21  16  24  23  19  23  16

Hyperplasia, focal, C‑cell   1   2   2   1   1   0   1   1

Hyperplasia, follicular cell   6   8   4   4   0   1   1   0

Infiltrate, mononuclear cell   0   0   1   0   0   0   0   0

Inflammation, chronic‑active   0   0   0   0   0   1   0   0

M‑Carcinoma, C‑cell   0   2   0   0   1   0   0   0

M‑Carcinoma, follicular cell   3   0   0   2   0   0   1   0

Tongue Number Examined:  22  26  19  27  30  27  26  25

Unremarkable:  22  26  18  27  30  27  26  25

Erosion/ulcer   0   0   1   0   0   0   0   0

Inflammation, chronic‑active   0   0   1   0   0   0   0   0

Tooth, Other Number Examined:   0   0   1   0   0   0   0   0

Unremarkable:   0   0   0   0   0   0   0   0

M‑Osteosarcoma   0   0   1   0   0   0   0   0

‑‑‑‑‑‑‑‑‑‑‑‑‑‑‑‑‑‑‑‑‑‑‑‑‑‑‑‑‑‑‑‑‑‑‑‑‑‑‑‑‑‑‑‑‑‑‑‑‑‑‑‑‑‑‑‑‑‑‑‑‑‑‑‑‑‑‑‑‑‑‑‑‑‑‑‑‑‑‑‑‑‑‑‑‑‑‑‑‑‑‑‑‑‑‑‑‑‑‑‑‑‑‑‑‑‑‑

Table

Incidence of Microscopic Observations

Unscheduled Euthanasias and Deaths

Test Article (dosage) 1M 2M 3M 4M 1F 2F 3F 4F

‑‑‑‑‑‑‑‑‑‑‑‑‑‑‑‑‑‑‑‑‑‑‑‑‑‑‑ ‑‑‑‑‑‑‑‑ ‑‑ ‑‑ ‑‑ ‑‑ ‑‑ ‑‑ ‑‑ ‑‑

Benzonatate (PF‑00345410) mg/kg/day 0 10 30 90 0 5 15 50

‑‑‑‑‑‑‑‑‑‑‑‑‑‑‑‑‑‑‑‑‑‑‑‑‑‑‑‑‑‑‑‑‑‑‑‑‑‑‑‑‑‑‑‑‑‑‑‑‑‑‑‑‑‑‑‑‑‑‑‑‑‑‑‑‑‑‑‑‑‑‑‑‑‑‑‑‑‑‑‑‑‑‑‑‑‑‑‑‑‑‑‑‑‑‑‑‑‑‑‑‑‑‑‑‑‑‑‑

Tissue/ Group/Subgroup/Sex: 1/1/M 2/1/M 3/1/M 4/1/M 1/1/F 2/1/F 3/1/F 4/1/F

Observation Number of Animals:  22  26  19  27  30  27  26  25

‑‑‑‑‑‑‑‑‑‑‑‑‑‑‑‑‑‑‑‑‑‑‑‑‑‑‑‑‑‑‑‑‑‑‑‑‑‑‑‑‑‑‑‑‑‑‑‑‑‑‑‑‑‑‑‑‑‑‑‑‑‑‑‑‑‑‑‑‑‑‑‑‑‑‑‑‑‑‑‑‑‑‑‑‑‑‑‑‑‑‑‑‑‑‑‑‑‑‑‑‑‑‑‑‑‑‑‑

Trachea Number Examined:  22  26  19  27  30  27  26  25

Unremarkable:  22  26  18  27  29  26  26  25

Hemorrhage   0   0   1   0   0   0   0   0

Hyperplasia, epithelium   0   0   0   0   1   0   0   0

Inflammation, acute   0   0   1   0   1   0   0   0

Inflammation, chronic‑active   0   0   0   0   0   1   0   0

Ureter Number Examined:  22  26  19  27  30  27  26  25

Unremarkable:  20  25  19  27  29  26  24  25

Dilatation   0   0   0   0   1   0   0   0

Erosion/ulcer   0   0   0   0   0   1   0   0

Hyperplasia, transitional cell   2   1   0   0   0   1   2   0

Inflammation   2   1   0   0   1   1   2   0

Urinary Bladder Number Examined:  22  26  19  27  30  26  26  25

Unremarkable:  20  24  19  26  29  25  23  25

Hemorrhage   1   0   0   0   0   0   0   0

Hyperplasia, transitional cell   1   1   0   1   0   1   2   0

Inflammation   2   2   0   1   0   1   2   0

M‑Carcinoma, transitional cell   0   0   0   0   1   0   0   0

N‑Carcinoma   0   0   0   0   0   0   1   0

‑‑‑‑‑‑‑‑‑‑‑‑‑‑‑‑‑‑‑‑‑‑‑‑‑‑‑‑‑‑‑‑‑‑‑‑‑‑‑‑‑‑‑‑‑‑‑‑‑‑‑‑‑‑‑‑‑‑‑‑‑‑‑‑‑‑‑‑‑‑‑‑‑‑‑‑‑‑‑‑‑‑‑‑‑‑‑‑‑‑‑‑‑‑‑‑‑‑‑‑‑‑‑‑‑‑‑

Table

Incidence of Microscopic Observations

Unscheduled Euthanasias and Deaths

Test Article (dosage) 1M 2M 3M 4M 1F 2F 3F 4F

‑‑‑‑‑‑‑‑‑‑‑‑‑‑‑‑‑‑‑‑‑‑‑‑‑‑‑ ‑‑‑‑‑‑‑‑ ‑‑ ‑‑ ‑‑ ‑‑ ‑‑ ‑‑ ‑‑ ‑‑

Benzonatate (PF‑00345410) mg/kg/day 0 10 30 90 0 5 15 50

‑‑‑‑‑‑‑‑‑‑‑‑‑‑‑‑‑‑‑‑‑‑‑‑‑‑‑‑‑‑‑‑‑‑‑‑‑‑‑‑‑‑‑‑‑‑‑‑‑‑‑‑‑‑‑‑‑‑‑‑‑‑‑‑‑‑‑‑‑‑‑‑‑‑‑‑‑‑‑‑‑‑‑‑‑‑‑‑‑‑‑‑‑‑‑‑‑‑‑‑‑‑‑‑‑‑‑‑

Tissue/ Group/Subgroup/Sex: 1/1/M 2/1/M 3/1/M 4/1/M 1/1/F 2/1/F 3/1/F 4/1/F

Observation Number of Animals:  22  26  19  27  30  27  26  25

‑‑‑‑‑‑‑‑‑‑‑‑‑‑‑‑‑‑‑‑‑‑‑‑‑‑‑‑‑‑‑‑‑‑‑‑‑‑‑‑‑‑‑‑‑‑‑‑‑‑‑‑‑‑‑‑‑‑‑‑‑‑‑‑‑‑‑‑‑‑‑‑‑‑‑‑‑‑‑‑‑‑‑‑‑‑‑‑‑‑‑‑‑‑‑‑‑‑‑‑‑‑‑‑‑‑‑‑

Uterus Number Examined:   0   0   0   0  30  27  26  25

Unremarkable:   0   0   0   0  21  22  20  19

B‑Polyp, endometrial stromal   0   0   0   0   1   1   1   0

C‑Hematopoietic neoplasm, see

body, whole for type 0 0 0 0 1 0 1 1

Cyst   0   0   0   0   1   1   0   1

Dilatation   0   0   0   0   0   1   4   1

Hemorrhage   0   0   0   0   0   1   0   0

Hyperplasia, cystic endometrial   0   0   0   0   3   0   0   1

Hyperplasia, endometrium   0   0   0   0   0   0   1   0

Inflammation, chronic‑active   0   0   0   0   0   2   4   0

M‑Carcinoma   0   0   0   0   1   1   0   1

M‑Carcinoma, squamous cell   0   0   0   0   0   0   0   1

M‑Leiomyosarcoma   0   0   0   0   1   0   0   0

M‑Sarcoma, stromal   0   0   0   0   1   0   0   0

N‑Carcinoma   0   0   0   0   1   0   0   0

Vagina Number Examined:   0   0   0   0  30  27  26  25

Unremarkable:   0   0   0   0  17  12  15  18

C‑Hematopoietic neoplasm, see

body, whole for type 0 0 0 0 0 0 1 1

Exudate, lumen   0   0   0   0   4   3   1   4

I‑CarcinomaI‑Carcinoma   0   0   0   0   0   1   0   0

I‑Sarcoma   0   0   0   0   1   1   0   0

Mucification, epithelium   0   0   0   0   8  12   9   4

‑‑‑‑‑‑‑‑‑‑‑‑‑‑‑‑‑‑‑‑‑‑‑‑‑‑‑‑‑‑‑‑‑‑‑‑‑‑‑‑‑‑‑‑‑‑‑‑‑‑‑‑‑‑‑‑‑‑‑‑‑‑‑‑‑‑‑‑‑‑‑‑‑‑‑‑‑‑‑‑‑‑‑‑‑‑‑‑‑‑‑‑‑‑‑‑‑‑‑‑‑‑‑‑‑‑‑

Table 5.6: Incidence of Microscopic Observations - All Animals

Test Article (dosage) 1M 2M 3M 4M 1F 2F 3F 4F

‑‑‑‑‑‑‑‑‑‑‑‑‑‑‑‑‑‑‑‑‑‑‑‑‑‑‑ ‑‑‑‑‑‑‑‑ ‑‑ ‑‑ ‑‑ ‑‑ ‑‑ ‑‑ ‑‑ ‑‑

Benzonatate (PF‑00345410) mg/kg/day 0 10 30 90 0 5 15 50

‑‑‑‑‑‑‑‑‑‑‑‑‑‑‑‑‑‑‑‑‑‑‑‑‑‑‑‑‑‑‑‑‑‑‑‑‑‑‑‑‑‑‑‑‑‑‑‑‑‑‑‑‑‑‑‑‑‑‑‑‑‑‑‑‑‑‑‑‑‑‑‑‑‑‑‑‑‑‑‑‑‑‑‑‑‑‑‑‑‑‑‑‑‑‑‑‑‑‑‑‑‑‑‑‑‑‑‑

Tissue/ Group/Subgroup/Sex: 1/1/M 2/1/M 3/1/M 4/1/M 1/1/F 2/1/F 3/1/F 4/1/F

Observation Number of Animals:  55  50  50  55  55  50  50  55

‑‑‑‑‑‑‑‑‑‑‑‑‑‑‑‑‑‑‑‑‑‑‑‑‑‑‑‑‑‑‑‑‑‑‑‑‑‑‑‑‑‑‑‑‑‑‑‑‑‑‑‑‑‑‑‑‑‑‑‑‑‑‑‑‑‑‑‑‑‑‑‑‑‑‑‑‑‑‑‑‑‑‑‑‑‑‑‑‑‑‑‑‑‑‑‑‑‑‑‑‑‑‑‑‑‑‑‑

Abdominal Cavity Number Examined:   0   0   0   1   1   1   1   0

Unremarkable:   0   0   0   0   0   0   0   0

C‑Vascular neoplasm, see body,

whole for type 0 0 0 0 0 1 0 0

Hemorrhage   0   0   0   0   1   0   0   0

I‑Carcinoma   0   0   0   0   0   0   1   0

Necrosis, fat   0   0   0   1   0   0   0   0

Adipose, Other Number Examined:   0   0   0   0   5   0   0   4

Unremarkable:   0   0   0   0   0   0   0   1

C‑Vascular neoplasm, see body,

whole for type 0 0 0 0 1 0 0 0

Inflammation, chronic‑active   0   0   0   0   0   0   0   1

N‑Carcinoma   0   0   0   0   1   0   0   1

Necrosis   0   0   0   0   3   0   0   2

Adipose, White,

Kidney Fat Pad Number Examined: 0 0 1 0 0 0 0 0

Unremarkable: 0 0 0 0 0 0 0 0

Hemorrhage   0   0   1   0   0   0   0   0

Inflammation, chronic‑active   0   0   1   0   0   0   0   0

‑‑‑‑‑‑‑‑‑‑‑‑‑‑‑‑‑‑‑‑‑‑‑‑‑‑‑‑‑‑‑‑‑‑‑‑‑‑‑‑‑‑‑‑‑‑‑‑‑‑‑‑‑‑‑‑‑‑‑‑‑‑‑‑‑‑‑‑‑‑‑‑‑‑‑‑‑‑‑‑‑‑‑‑‑‑‑‑‑‑‑‑‑‑‑‑‑‑‑‑‑‑‑‑‑‑‑

Table

Incidence of Microscopic Observations

All Animals

Test Article (dosage) 1M 2M 3M 4M 1F 2F 3F 4F

‑‑‑‑‑‑‑‑‑‑‑‑‑‑‑‑‑‑‑‑‑‑‑‑‑‑‑ ‑‑‑‑‑‑‑‑ ‑‑ ‑‑ ‑‑ ‑‑ ‑‑ ‑‑ ‑‑ ‑‑

Benzonatate (PF‑00345410) mg/kg/day 0 10 30 90 0 5 15 50

‑‑‑‑‑‑‑‑‑‑‑‑‑‑‑‑‑‑‑‑‑‑‑‑‑‑‑‑‑‑‑‑‑‑‑‑‑‑‑‑‑‑‑‑‑‑‑‑‑‑‑‑‑‑‑‑‑‑‑‑‑‑‑‑‑‑‑‑‑‑‑‑‑‑‑‑‑‑‑‑‑‑‑‑‑‑‑‑‑‑‑‑‑‑‑‑‑‑‑‑‑‑‑‑‑‑‑‑

Tissue/ Group/Subgroup/Sex: 1/1/M 2/1/M 3/1/M 4/1/M 1/1/F 2/1/F 3/1/F 4/1/F

Observation Number of Animals:  55  50  50  55  55  50  50  55

‑‑‑‑‑‑‑‑‑‑‑‑‑‑‑‑‑‑‑‑‑‑‑‑‑‑‑‑‑‑‑‑‑‑‑‑‑‑‑‑‑‑‑‑‑‑‑‑‑‑‑‑‑‑‑‑‑‑‑‑‑‑‑‑‑‑‑‑‑‑‑‑‑‑‑‑‑‑‑‑‑‑‑‑‑‑‑‑‑‑‑‑‑‑‑‑‑‑‑‑‑‑‑‑‑‑‑‑

Adipose, White,

Mesenteric Number Examined: 0 0 0 1 0 0 0 0

Unremarkable: 0 0 0 0 0 0 0 0

M‑Fibrosarcoma   0   0   0   1   0   0   0   0

Adrenal, Cortex Number Examined:  55  49  50  55  55  50  50  55

Unremarkable:  14  12   7  15   3   3   3   1

Atrophy   0   0   0   0   1   0   0   2

B‑Adenoma   4   3   2   0   1   2   2   3

C‑Hematopoietic neoplasm, see

body, whole for type 0 0 0 0 0 0 0 1

Degeneration, cystic/hemorrhagic  38  35  42  39  51  46  47  52

Hematopoiesis, increased   0   0   0   0   0   0   0   1

Hyperplasia   3   4   1   2   1   3   1   1

Hypertrophy   5   9   9   2   6   3   6   4

Inflammation, chronic‑active   0   0   0   0   0   0   1   0

M‑Carcinoma   0   1   0   2   1   1   1   1

N‑Carcinoma   0   0   0   0   1   0   0   0

Necrosis   0   1   0   0   0   0   0   0

Adrenal, Medulla Number Examined:  55  49  50  55  55  50  50  55

Unremarkable:  54  46  48  53  53  49  48  54

B‑Pheochromocytoma   1   0   2   0   2   0   0   0

Hyperplasia   0   1   0   1   0   0   1   0

Infiltrate, mononuclear cell   0   0   0   1   0   1   1   1

M‑Malignant pheochromocytoma   0   2   0   0   0   0   0   0

‑‑‑‑‑‑‑‑‑‑‑‑‑‑‑‑‑‑‑‑‑‑‑‑‑‑‑‑‑‑‑‑‑‑‑‑‑‑‑‑‑‑‑‑‑‑‑‑‑‑‑‑‑‑‑‑‑‑‑‑‑‑‑‑‑‑‑‑‑‑‑‑‑‑‑‑‑‑‑‑‑‑‑‑‑‑‑‑‑‑‑‑‑‑‑‑‑‑‑‑‑‑‑‑‑‑‑

Table

Incidence of Microscopic Observations

All Animals

Test Article (dosage) 1M 2M 3M 4M 1F 2F 3F 4F

‑‑‑‑‑‑‑‑‑‑‑‑‑‑‑‑‑‑‑‑‑‑‑‑‑‑‑ ‑‑‑‑‑‑‑‑ ‑‑ ‑‑ ‑‑ ‑‑ ‑‑ ‑‑ ‑‑ ‑‑

Benzonatate (PF‑00345410) mg/kg/day 0 10 30 90 0 5 15 50

‑‑‑‑‑‑‑‑‑‑‑‑‑‑‑‑‑‑‑‑‑‑‑‑‑‑‑‑‑‑‑‑‑‑‑‑‑‑‑‑‑‑‑‑‑‑‑‑‑‑‑‑‑‑‑‑‑‑‑‑‑‑‑‑‑‑‑‑‑‑‑‑‑‑‑‑‑‑‑‑‑‑‑‑‑‑‑‑‑‑‑‑‑‑‑‑‑‑‑‑‑‑‑‑‑‑‑‑

Tissue/ Group/Subgroup/Sex: 1/1/M 2/1/M 3/1/M 4/1/M 1/1/F 2/1/F 3/1/F 4/1/F

Observation Number of Animals:  55  50  50  55  55  50  50  55

‑‑‑‑‑‑‑‑‑‑‑‑‑‑‑‑‑‑‑‑‑‑‑‑‑‑‑‑‑‑‑‑‑‑‑‑‑‑‑‑‑‑‑‑‑‑‑‑‑‑‑‑‑‑‑‑‑‑‑‑‑‑‑‑‑‑‑‑‑‑‑‑‑‑‑‑‑‑‑‑‑‑‑‑‑‑‑‑‑‑‑‑‑‑‑‑‑‑‑‑‑‑‑‑‑‑‑‑

Aorta Number Examined:  55  50  50  55  55  50  50  55

Unremarkable:  55  49  50  55  55  50  50  55

Mineralization   0   1   0   0   0   0   0   0

Body, Whole/Cavity Number Examined:  55  50  50  55  55  50  50  55

Unremarkable:  46  37  40  42  49  47  41  48

B‑Angioma   0   0   0   0   0   0   1   0

B‑Hemangioma   1   2   3   2   2   0   1   1

M‑Hemangiosarcoma   6   6   4   5   2   2   3   1

M‑Histiocytic Sarcoma   0   3   1   2   2   1   1   4

M‑Leukemia, mononuclear cell   0   0   0   0   0   0   0   1

M‑Lymphosarcoma   3   2   2   3   0   0   3   0

M‑Mesothelioma   1   1   0   1   0   0   0   0

M‑Plasma cell tumor   0   0   0   0   1   0   0   0

‑‑‑‑‑‑‑‑‑‑‑‑‑‑‑‑‑‑‑‑‑‑‑‑‑‑‑‑‑‑‑‑‑‑‑‑‑‑‑‑‑‑‑‑‑‑‑‑‑‑‑‑‑‑‑‑‑‑‑‑‑‑‑‑‑‑‑‑‑‑‑‑‑‑‑‑‑‑‑‑‑‑‑‑‑‑‑‑‑‑‑‑‑‑‑‑‑‑‑‑‑‑‑‑‑‑‑

Table

Incidence of Microscopic Observations

All Animals

Test Article (dosage) 1M 2M 3M 4M 1F 2F 3F 4F

‑‑‑‑‑‑‑‑‑‑‑‑‑‑‑‑‑‑‑‑‑‑‑‑‑‑‑ ‑‑‑‑‑‑‑‑ ‑‑ ‑‑ ‑‑ ‑‑ ‑‑ ‑‑ ‑‑ ‑‑

Benzonatate (PF‑00345410) mg/kg/day 0 10 30 90 0 5 15 50

‑‑‑‑‑‑‑‑‑‑‑‑‑‑‑‑‑‑‑‑‑‑‑‑‑‑‑‑‑‑‑‑‑‑‑‑‑‑‑‑‑‑‑‑‑‑‑‑‑‑‑‑‑‑‑‑‑‑‑‑‑‑‑‑‑‑‑‑‑‑‑‑‑‑‑‑‑‑‑‑‑‑‑‑‑‑‑‑‑‑‑‑‑‑‑‑‑‑‑‑‑‑‑‑‑‑‑‑

Tissue/ Group/Subgroup/Sex: 1/1/M 2/1/M 3/1/M 4/1/M 1/1/F 2/1/F 3/1/F 4/1/F

Observation Number of Animals:  55  50  50  55  55  50  50  55

‑‑‑‑‑‑‑‑‑‑‑‑‑‑‑‑‑‑‑‑‑‑‑‑‑‑‑‑‑‑‑‑‑‑‑‑‑‑‑‑‑‑‑‑‑‑‑‑‑‑‑‑‑‑‑‑‑‑‑‑‑‑‑‑‑‑‑‑‑‑‑‑‑‑‑‑‑‑‑‑‑‑‑‑‑‑‑‑‑‑‑‑‑‑‑‑‑‑‑‑‑‑‑‑‑‑‑‑

Brain Number Examined:  55  50  50  55  55  50  50  55

Unremarkable:  37  37  41  38  27  21  24  26

B‑Granular cell tumor   0   1   0   2   1   0   0   0

B‑Oligodendroglioma   1   0   0   2   0   0   0   0

C‑Hematopoietic neoplasm, see

body, whole for type 0 0 0 1 0 0 0 0

Compression, ventral  14  12   8  11  28  29  26  29

Gliosis   0   0   0   1   0   1   0   0

Hemorrhage   1   0   0   0   0   0   0   0

I‑Carcinoma   0   0   0   1   1   0   0   1

M‑Malignant astrocytoma   1   0   1   0   0   0   0   0

M‑Meningeal sarcoma   0   0   0   1   0   0   0   0

N‑Carcinoma   0   0   0   0   1   0   0   0

Necrosis, gray matter   0   0   0   1   0   1   0   0

Necrosis/loss, neurons   0   1   0   0   0   0   0   0

Vacuoles, white matter   1   0   0   0   0   0   0   0

‑‑‑‑‑‑‑‑‑‑‑‑‑‑‑‑‑‑‑‑‑‑‑‑‑‑‑‑‑‑‑‑‑‑‑‑‑‑‑‑‑‑‑‑‑‑‑‑‑‑‑‑‑‑‑‑‑‑‑‑‑‑‑‑‑‑‑‑‑‑‑‑‑‑‑‑‑‑‑‑‑‑‑‑‑‑‑‑‑‑‑‑‑‑‑‑‑‑‑‑‑‑‑‑‑‑‑

Table

Incidence of Microscopic Observations

All Animals

Test Article (dosage) 1M 2M 3M 4M 1F 2F 3F 4F

‑‑‑‑‑‑‑‑‑‑‑‑‑‑‑‑‑‑‑‑‑‑‑‑‑‑‑ ‑‑‑‑‑‑‑‑ ‑‑ ‑‑ ‑‑ ‑‑ ‑‑ ‑‑ ‑‑ ‑‑

Benzonatate (PF‑00345410) mg/kg/day 0 10 30 90 0 5 15 50

‑‑‑‑‑‑‑‑‑‑‑‑‑‑‑‑‑‑‑‑‑‑‑‑‑‑‑‑‑‑‑‑‑‑‑‑‑‑‑‑‑‑‑‑‑‑‑‑‑‑‑‑‑‑‑‑‑‑‑‑‑‑‑‑‑‑‑‑‑‑‑‑‑‑‑‑‑‑‑‑‑‑‑‑‑‑‑‑‑‑‑‑‑‑‑‑‑‑‑‑‑‑‑‑‑‑‑‑

Tissue/ Group/Subgroup/Sex: 1/1/M 2/1/M 3/1/M 4/1/M 1/1/F 2/1/F 3/1/F 4/1/F

Observation Number of Animals:  55  50  50  55  55  50  50  55

‑‑‑‑‑‑‑‑‑‑‑‑‑‑‑‑‑‑‑‑‑‑‑‑‑‑‑‑‑‑‑‑‑‑‑‑‑‑‑‑‑‑‑‑‑‑‑‑‑‑‑‑‑‑‑‑‑‑‑‑‑‑‑‑‑‑‑‑‑‑‑‑‑‑‑‑‑‑‑‑‑‑‑‑‑‑‑‑‑‑‑‑‑‑‑‑‑‑‑‑‑‑‑‑‑‑‑‑

Cecum Number Examined:  55  49  50  53  55  48  50  55

Unremarkable:  54  49  50  52  55  48  48  54

B‑Lipoma   0   0   0   1   0   0   0   0

Ectasia, crypt/gland   1   0   0   0   0   0   0   0

Erosion/ulcer   0   0   0   0   0   0   0   1

Hemorrhage   1   0   0   0   0   0   0   0

Inflammation   1   0   0   0   0   0   0   0

Inflammation, chronic,

vascular/perivascular 0 0 0 0 0 0 1 0

Parasite, nematode   0   0   0   0   0   0   1   0

‑‑‑‑‑‑‑‑‑‑‑‑‑‑‑‑‑‑‑‑‑‑‑‑‑‑‑‑‑‑‑‑‑‑‑‑‑‑‑‑‑‑‑‑‑‑‑‑‑‑‑‑‑‑‑‑‑‑‑‑‑‑‑‑‑‑‑‑‑‑‑‑‑‑‑‑‑‑‑‑‑‑‑‑‑‑‑‑‑‑‑‑‑‑‑‑‑‑‑‑‑‑‑‑‑‑‑

Table

Incidence of Microscopic Observations

All Animals

Test Article (dosage) 1M 2M 3M 4M 1F 2F 3F 4F

‑‑‑‑‑‑‑‑‑‑‑‑‑‑‑‑‑‑‑‑‑‑‑‑‑‑‑ ‑‑‑‑‑‑‑‑ ‑‑ ‑‑ ‑‑ ‑‑ ‑‑ ‑‑ ‑‑ ‑‑

Benzonatate (PF‑00345410) mg/kg/day 0 10 30 90 0 5 15 50

‑‑‑‑‑‑‑‑‑‑‑‑‑‑‑‑‑‑‑‑‑‑‑‑‑‑‑‑‑‑‑‑‑‑‑‑‑‑‑‑‑‑‑‑‑‑‑‑‑‑‑‑‑‑‑‑‑‑‑‑‑‑‑‑‑‑‑‑‑‑‑‑‑‑‑‑‑‑‑‑‑‑‑‑‑‑‑‑‑‑‑‑‑‑‑‑‑‑‑‑‑‑‑‑‑‑‑‑

Tissue/ Group/Subgroup/Sex: 1/1/M 2/1/M 3/1/M 4/1/M 1/1/F 2/1/F 3/1/F 4/1/F

Observation Number of Animals:  55  50  50  55  55  50  50  55

‑‑‑‑‑‑‑‑‑‑‑‑‑‑‑‑‑‑‑‑‑‑‑‑‑‑‑‑‑‑‑‑‑‑‑‑‑‑‑‑‑‑‑‑‑‑‑‑‑‑‑‑‑‑‑‑‑‑‑‑‑‑‑‑‑‑‑‑‑‑‑‑‑‑‑‑‑‑‑‑‑‑‑‑‑‑‑‑‑‑‑‑‑‑‑‑‑‑‑‑‑‑‑‑‑‑‑‑

Cervix Number Examined:   0   0   0   0  55  50  50  55

Unremarkable:   0   0   0   0  45  39  40  46

B‑Polyp, stromal   0   0   0   0   1   2   0   0

C‑Hematopoietic neoplasm, see

body, whole for type 0 0 0 0 0 0 1 2

C‑Vascular neoplasm, see body,

whole for type 0 0 0 0 0 0 1 0

Cyst   0   0   0   0   0   1   0   0

Hyperplasia, epithelium   0   0   0   0   5   1   5   4

Hypertrophy, stroma   0   0   0   0   0   1   0   1

I‑Carcinoma   0   0   0   0   0   1   0   0

Inflammation, chronic‑active   0   0   0   0   0   1   0   1

I‑Sarcoma   0   0   0   0   1   0   0   0

Lumen, exudate/debris   0   0   0   0   4   4   0   1

M‑Carcinoma   0   0   0   0   1   0   1   0

M‑Carcinoma, squamous cell   0   0   0   0   0   1   0   0

M‑Leiomyosarcoma   0   0   0   0   0   0   1   0

M‑Sarcoma, stromal   0   0   0   0   0   1   2   0

Clitoral Gland Number Examined:   0   0   0   0   2   1   0   3

Unremarkable:   0   0   0   0   0   0   0   1

Inflammation/cyst   0   0   0   0   2   0   0   2

M‑Carcinoma   0   0   0   0   0   1   0   0

‑‑‑‑‑‑‑‑‑‑‑‑‑‑‑‑‑‑‑‑‑‑‑‑‑‑‑‑‑‑‑‑‑‑‑‑‑‑‑‑‑‑‑‑‑‑‑‑‑‑‑‑‑‑‑‑‑‑‑‑‑‑‑‑‑‑‑‑‑‑‑‑‑‑‑‑‑‑‑‑‑‑‑‑‑‑‑‑‑‑‑‑‑‑‑‑‑‑‑‑‑‑‑‑‑‑‑

Table

Incidence of Microscopic Observations

All Animals

Test Article (dosage) 1M 2M 3M 4M 1F 2F 3F 4F

‑‑‑‑‑‑‑‑‑‑‑‑‑‑‑‑‑‑‑‑‑‑‑‑‑‑‑ ‑‑‑‑‑‑‑‑ ‑‑ ‑‑ ‑‑ ‑‑ ‑‑ ‑‑ ‑‑ ‑‑

Benzonatate (PF‑00345410) mg/kg/day 0 10 30 90 0 5 15 50

‑‑‑‑‑‑‑‑‑‑‑‑‑‑‑‑‑‑‑‑‑‑‑‑‑‑‑‑‑‑‑‑‑‑‑‑‑‑‑‑‑‑‑‑‑‑‑‑‑‑‑‑‑‑‑‑‑‑‑‑‑‑‑‑‑‑‑‑‑‑‑‑‑‑‑‑‑‑‑‑‑‑‑‑‑‑‑‑‑‑‑‑‑‑‑‑‑‑‑‑‑‑‑‑‑‑‑‑

Tissue/ Group/Subgroup/Sex: 1/1/M 2/1/M 3/1/M 4/1/M 1/1/F 2/1/F 3/1/F 4/1/F

Observation Number of Animals:  55  50  50  55  55  50  50  55

‑‑‑‑‑‑‑‑‑‑‑‑‑‑‑‑‑‑‑‑‑‑‑‑‑‑‑‑‑‑‑‑‑‑‑‑‑‑‑‑‑‑‑‑‑‑‑‑‑‑‑‑‑‑‑‑‑‑‑‑‑‑‑‑‑‑‑‑‑‑‑‑‑‑‑‑‑‑‑‑‑‑‑‑‑‑‑‑‑‑‑‑‑‑‑‑‑‑‑‑‑‑‑‑‑‑‑‑

Colon Number Examined:  55  50  50  55  55  50  50  55

Unremarkable:  54  49  48  54  53  49  50  55

C‑Hematopoietic neoplasm, see

body, whole for type 0 0 0 0 1 0 0 0

Parasite, nematode   1   1   2   1   1   1   0   0

‑‑‑‑‑‑‑‑‑‑‑‑‑‑‑‑‑‑‑‑‑‑‑‑‑‑‑‑‑‑‑‑‑‑‑‑‑‑‑‑‑‑‑‑‑‑‑‑‑‑‑‑‑‑‑‑‑‑‑‑‑‑‑‑‑‑‑‑‑‑‑‑‑‑‑‑‑‑‑‑‑‑‑‑‑‑‑‑‑‑‑‑‑‑‑‑‑‑‑‑‑‑‑‑‑‑‑

Table

Incidence of Microscopic Observations

All Animals

Test Article (dosage) 1M 2M 3M 4M 1F 2F 3F 4F

‑‑‑‑‑‑‑‑‑‑‑‑‑‑‑‑‑‑‑‑‑‑‑‑‑‑‑ ‑‑‑‑‑‑‑‑ ‑‑ ‑‑ ‑‑ ‑‑ ‑‑ ‑‑ ‑‑ ‑‑

Benzonatate (PF‑00345410) mg/kg/day 0 10 30 90 0 5 15 50

‑‑‑‑‑‑‑‑‑‑‑‑‑‑‑‑‑‑‑‑‑‑‑‑‑‑‑‑‑‑‑‑‑‑‑‑‑‑‑‑‑‑‑‑‑‑‑‑‑‑‑‑‑‑‑‑‑‑‑‑‑‑‑‑‑‑‑‑‑‑‑‑‑‑‑‑‑‑‑‑‑‑‑‑‑‑‑‑‑‑‑‑‑‑‑‑‑‑‑‑‑‑‑‑‑‑‑‑

Tissue/ Group/Subgroup/Sex: 1/1/M 2/1/M 3/1/M 4/1/M 1/1/F 2/1/F 3/1/F 4/1/F

Observation Number of Animals:  55  50  50  55  55  50  50  55

‑‑‑‑‑‑‑‑‑‑‑‑‑‑‑‑‑‑‑‑‑‑‑‑‑‑‑‑‑‑‑‑‑‑‑‑‑‑‑‑‑‑‑‑‑‑‑‑‑‑‑‑‑‑‑‑‑‑‑‑‑‑‑‑‑‑‑‑‑‑‑‑‑‑‑‑‑‑‑‑‑‑‑‑‑‑‑‑‑‑‑‑‑‑‑‑‑‑‑‑‑‑‑‑‑‑‑‑

Death Comment Number Examined:  55  50  50  55  55  50  50  55

Unremarkable:   0   0   0   0   0   0   0   0

Accidental   1   0   0   0   1   0   0   0

Chronic anemia   0   0   0   0   0   1   0   0

Degeneration, peripheral nerve   0   0   0   1   0   0   0   0

Heart failure   0   1   0   0   0   0   0   0

Hematopoietic neoplasm   1   3   0   3   1   1   1   4

Inflammation   3   3   6   5   1   2   4   2

Malacia, central nervous system   1   0   0   0   0   0   0   0

Mesothelioma   0   0   1   0   0   0   0   0

Neoplasia, abdominal cavity   0   0   0   1   0   0   0   0

Neoplasia, alimentary   1   1   1   0   0   0   0   0

Neoplasia, endocrine   0   0   0   0   1   0   0   0

Neoplasia, mammary   0   0   0   0   3   6   2   3

Neoplasia, nervous system   2   2   0   3   0   0   0   0

Neoplasia, pituitary   8  10   7   5  18  10  13  12

Neoplasia, reproductive/urinary   0   0   0   0   4   3   5   1

Neoplasia, skeletal   0   0   2   0   0   0   0   0

Neoplasia, skin   2   3   1   4   1   1   1   0

Neoplasm, vascular   1   0   0   1   0   1   0   0

Scheduled sacrifice  33  24  31  28  25  23  24  30

Undetermined   2   3   1   4   0   2   0   3

‑‑‑‑‑‑‑‑‑‑‑‑‑‑‑‑‑‑‑‑‑‑‑‑‑‑‑‑‑‑‑‑‑‑‑‑‑‑‑‑‑‑‑‑‑‑‑‑‑‑‑‑‑‑‑‑‑‑‑‑‑‑‑‑‑‑‑‑‑‑‑‑‑‑‑‑‑‑‑‑‑‑‑‑‑‑‑‑‑‑‑‑‑‑‑‑‑‑‑‑‑‑‑‑‑‑‑

Table

Incidence of Microscopic Observations

All Animals

Test Article (dosage) 1M 2M 3M 4M 1F 2F 3F 4F

‑‑‑‑‑‑‑‑‑‑‑‑‑‑‑‑‑‑‑‑‑‑‑‑‑‑‑ ‑‑‑‑‑‑‑‑ ‑‑ ‑‑ ‑‑ ‑‑ ‑‑ ‑‑ ‑‑ ‑‑

Benzonatate (PF‑00345410) mg/kg/day 0 10 30 90 0 5 15 50

‑‑‑‑‑‑‑‑‑‑‑‑‑‑‑‑‑‑‑‑‑‑‑‑‑‑‑‑‑‑‑‑‑‑‑‑‑‑‑‑‑‑‑‑‑‑‑‑‑‑‑‑‑‑‑‑‑‑‑‑‑‑‑‑‑‑‑‑‑‑‑‑‑‑‑‑‑‑‑‑‑‑‑‑‑‑‑‑‑‑‑‑‑‑‑‑‑‑‑‑‑‑‑‑‑‑‑‑

Tissue/ Group/Subgroup/Sex: 1/1/M 2/1/M 3/1/M 4/1/M 1/1/F 2/1/F 3/1/F 4/1/F

Observation Number of Animals:  55  50  50  55  55  50  50  55

‑‑‑‑‑‑‑‑‑‑‑‑‑‑‑‑‑‑‑‑‑‑‑‑‑‑‑‑‑‑‑‑‑‑‑‑‑‑‑‑‑‑‑‑‑‑‑‑‑‑‑‑‑‑‑‑‑‑‑‑‑‑‑‑‑‑‑‑‑‑‑‑‑‑‑‑‑‑‑‑‑‑‑‑‑‑‑‑‑‑‑‑‑‑‑‑‑‑‑‑‑‑‑‑‑‑‑‑

Duodenum Number Examined:  54  48  50  54  55  48  50  55

Unremarkable:  54  48  49  54  54  48  50  55

C‑Vascular neoplasm, see body,

whole for type 0 0 0 0 1 0 0 0

Ulcer   0   0   1   0   0   0   0   0

Epididymis Number Examined:  55  50  50  55   0   0   0   0

Unremarkable:  47  46  45  52   0   0   0   0

C‑Mesothelioma, see body, whole   1   1   0   1   0   0   0   0

Granuloma, sperm   1   1   1   0   0   0   0   0

Hypospermia   6   2   2   2   0   0   0   0

Infiltrate, mononuclear cell   1   0   2   0   0   0   0   0

Esophagus Number Examined:  55  50  50  55  55  50  50  55

Unremarkable:  52  48  49  54  53  48  50  55

Degeneration/regeneration,

muscularis 3 2 1 1 2 2 0 0

Inflammation, chronic‑active   0   0   0   0   1   1   0   0

Ulcer   0   0   0   0   1   0   0   0

‑‑‑‑‑‑‑‑‑‑‑‑‑‑‑‑‑‑‑‑‑‑‑‑‑‑‑‑‑‑‑‑‑‑‑‑‑‑‑‑‑‑‑‑‑‑‑‑‑‑‑‑‑‑‑‑‑‑‑‑‑‑‑‑‑‑‑‑‑‑‑‑‑‑‑‑‑‑‑‑‑‑‑‑‑‑‑‑‑‑‑‑‑‑‑‑‑‑‑‑‑‑‑‑‑‑‑

Table

Incidence of Microscopic Observations

All Animals

Test Article (dosage) 1M 2M 3M 4M 1F 2F 3F 4F

‑‑‑‑‑‑‑‑‑‑‑‑‑‑‑‑‑‑‑‑‑‑‑‑‑‑‑ ‑‑‑‑‑‑‑‑ ‑‑ ‑‑ ‑‑ ‑‑ ‑‑ ‑‑ ‑‑ ‑‑

Benzonatate (PF‑00345410) mg/kg/day 0 10 30 90 0 5 15 50

‑‑‑‑‑‑‑‑‑‑‑‑‑‑‑‑‑‑‑‑‑‑‑‑‑‑‑‑‑‑‑‑‑‑‑‑‑‑‑‑‑‑‑‑‑‑‑‑‑‑‑‑‑‑‑‑‑‑‑‑‑‑‑‑‑‑‑‑‑‑‑‑‑‑‑‑‑‑‑‑‑‑‑‑‑‑‑‑‑‑‑‑‑‑‑‑‑‑‑‑‑‑‑‑‑‑‑‑

Tissue/ Group/Subgroup/Sex: 1/1/M 2/1/M 3/1/M 4/1/M 1/1/F 2/1/F 3/1/F 4/1/F

Observation Number of Animals:  55  50  50  55  55  50  50  55

‑‑‑‑‑‑‑‑‑‑‑‑‑‑‑‑‑‑‑‑‑‑‑‑‑‑‑‑‑‑‑‑‑‑‑‑‑‑‑‑‑‑‑‑‑‑‑‑‑‑‑‑‑‑‑‑‑‑‑‑‑‑‑‑‑‑‑‑‑‑‑‑‑‑‑‑‑‑‑‑‑‑‑‑‑‑‑‑‑‑‑‑‑‑‑‑‑‑‑‑‑‑‑‑‑‑‑‑

Eye Number Examined:  54  50  50  55  55  50  50  55

Unremarkable:  45  40  35  40  42  44  42  41

Atrophy, retina   8  10  15  15  13   5   8  14

B‑Schwannoma   1   0   0   0   0   0   0   0

Cataract   0   0   1   1   0   0   0   0

Inflammation, chronic‑active   0   0   0   1   0   0   0   0

Rosette, retina   1   0   0   0   0   1   0   0

Ulceration, cornea   0   0   0   0   0   0   1   0

Foot/Footpad Number Examined:  11   4  11   7   1   3   3   6

Unremarkable:   0   1   0   0   0   0   0   0

Inflammation/hyperplasia  11   3  11   7   1   3   3   6

New bone formation   0   0   0   1   0   0   0   0

Ulcer   4   1   6   2   1   0   0   3

GALT/Peyer's Patch Number Examined:  52  49  49  55  52  46  44  51

Unremarkable:  52  49  49  54  51  46  44  51

C‑Hematopoietic neoplasm, see

body, whole for type 0 0 0 1 0 0 0 0

Necrosis, lymphocytes   0   0   0   0   1   0   0   0

‑‑‑‑‑‑‑‑‑‑‑‑‑‑‑‑‑‑‑‑‑‑‑‑‑‑‑‑‑‑‑‑‑‑‑‑‑‑‑‑‑‑‑‑‑‑‑‑‑‑‑‑‑‑‑‑‑‑‑‑‑‑‑‑‑‑‑‑‑‑‑‑‑‑‑‑‑‑‑‑‑‑‑‑‑‑‑‑‑‑‑‑‑‑‑‑‑‑‑‑‑‑‑‑‑‑‑

Table

Incidence of Microscopic Observations

All Animals

Test Article (dosage) 1M 2M 3M 4M 1F 2F 3F 4F

‑‑‑‑‑‑‑‑‑‑‑‑‑‑‑‑‑‑‑‑‑‑‑‑‑‑‑ ‑‑‑‑‑‑‑‑ ‑‑ ‑‑ ‑‑ ‑‑ ‑‑ ‑‑ ‑‑ ‑‑

Benzonatate (PF‑00345410) mg/kg/day 0 10 30 90 0 5 15 50

‑‑‑‑‑‑‑‑‑‑‑‑‑‑‑‑‑‑‑‑‑‑‑‑‑‑‑‑‑‑‑‑‑‑‑‑‑‑‑‑‑‑‑‑‑‑‑‑‑‑‑‑‑‑‑‑‑‑‑‑‑‑‑‑‑‑‑‑‑‑‑‑‑‑‑‑‑‑‑‑‑‑‑‑‑‑‑‑‑‑‑‑‑‑‑‑‑‑‑‑‑‑‑‑‑‑‑‑

Tissue/ Group/Subgroup/Sex: 1/1/M 2/1/M 3/1/M 4/1/M 1/1/F 2/1/F 3/1/F 4/1/F

Observation Number of Animals:  55  50  50  55  55  50  50  55

‑‑‑‑‑‑‑‑‑‑‑‑‑‑‑‑‑‑‑‑‑‑‑‑‑‑‑‑‑‑‑‑‑‑‑‑‑‑‑‑‑‑‑‑‑‑‑‑‑‑‑‑‑‑‑‑‑‑‑‑‑‑‑‑‑‑‑‑‑‑‑‑‑‑‑‑‑‑‑‑‑‑‑‑‑‑‑‑‑‑‑‑‑‑‑‑‑‑‑‑‑‑‑‑‑‑‑‑

Harderian Gland Number Examined:  54  50  50  55  55  50  50  55

Unremarkable:  21  29  32  28  37  34  34  35

B‑Adenoma   0   0   0   0   1   0   0   0

Degeneration   1   0   0   0   0   0   0   0

Hyperplasia   6   3   3   4   3   2   0   2

Infiltrate, mononuclear cell  28  17  18  26  16  14  14  17

Inflammation, chronic‑active   0   1   0   1   0   0   0   0

Inflammation, granulomatous   1   2   0   1   0   2   3   3

Heart Number Examined:  55  50  50  55  55  50  50  55

Unremarkable:  11  11   3   9  21  22  24  18

B‑Endocardial schwannoma   0   0   0   0   0   0   0   1

Cardiomyopathy, degenerative  43  36  45  45  34  28  25  37

C‑Hematopoietic neoplasm, see

body, whole for type 0 1 0 0 0 0 0 0

Hemorrhage   2   1   0   0   1   1   0   0

Hyperplasia, endocardium   0   0   1   1   0   0   0   1

Infiltrate, mononuclear cell   0   0   0   0   0   0   1   0

Inflammation, vessel   1   0   1   1   0   0   0   0

M‑Atriocaval mesothelioma   0   0   1   0   0   0   0   0

M‑Endocardial schwannoma   0   0   0   0   0   0   0   1

Mineralization, vessel   0   1   0   0   0   0   0   0

Thrombus, atrium   0   1   0   0   0   0   0   0

‑‑‑‑‑‑‑‑‑‑‑‑‑‑‑‑‑‑‑‑‑‑‑‑‑‑‑‑‑‑‑‑‑‑‑‑‑‑‑‑‑‑‑‑‑‑‑‑‑‑‑‑‑‑‑‑‑‑‑‑‑‑‑‑‑‑‑‑‑‑‑‑‑‑‑‑‑‑‑‑‑‑‑‑‑‑‑‑‑‑‑‑‑‑‑‑‑‑‑‑‑‑‑‑‑‑‑

Table

Incidence of Microscopic Observations

All Animals

Test Article (dosage) 1M 2M 3M 4M 1F 2F 3F 4F

‑‑‑‑‑‑‑‑‑‑‑‑‑‑‑‑‑‑‑‑‑‑‑‑‑‑‑ ‑‑‑‑‑‑‑‑ ‑‑ ‑‑ ‑‑ ‑‑ ‑‑ ‑‑ ‑‑ ‑‑

Benzonatate (PF‑00345410) mg/kg/day 0 10 30 90 0 5 15 50

‑‑‑‑‑‑‑‑‑‑‑‑‑‑‑‑‑‑‑‑‑‑‑‑‑‑‑‑‑‑‑‑‑‑‑‑‑‑‑‑‑‑‑‑‑‑‑‑‑‑‑‑‑‑‑‑‑‑‑‑‑‑‑‑‑‑‑‑‑‑‑‑‑‑‑‑‑‑‑‑‑‑‑‑‑‑‑‑‑‑‑‑‑‑‑‑‑‑‑‑‑‑‑‑‑‑‑‑

Tissue/ Group/Subgroup/Sex: 1/1/M 2/1/M 3/1/M 4/1/M 1/1/F 2/1/F 3/1/F 4/1/F

Observation Number of Animals:  55  50  50  55  55  50  50  55

‑‑‑‑‑‑‑‑‑‑‑‑‑‑‑‑‑‑‑‑‑‑‑‑‑‑‑‑‑‑‑‑‑‑‑‑‑‑‑‑‑‑‑‑‑‑‑‑‑‑‑‑‑‑‑‑‑‑‑‑‑‑‑‑‑‑‑‑‑‑‑‑‑‑‑‑‑‑‑‑‑‑‑‑‑‑‑‑‑‑‑‑‑‑‑‑‑‑‑‑‑‑‑‑‑‑‑‑

Ileum Number Examined:  54  49  48  54  55  48  50  54

Unremarkable:  54  49  48  53  55  48  50  54

Inflammation, chronic‑active   0   0   0   1   0   0   0   0

Jejunum Number Examined:  52  49  50  53  54  50  49  55

Unremarkable:  52  48  49  52  54  50  49  55

M‑Carcinoma   0   1   0   0   0   0   0   0

M‑Schwannoma   0   0   1   0   0   0   0   0

N‑Carcinoma   0   0   0   1   0   0   0   0

Joint, Other Number Examined:   1   1   0   0   0   0   0   0

Unremarkable:   1   0   0   0   0   0   0   0

Hyperostosis, periosteum   0   1   0   0   0   0   0   0

‑‑‑‑‑‑‑‑‑‑‑‑‑‑‑‑‑‑‑‑‑‑‑‑‑‑‑‑‑‑‑‑‑‑‑‑‑‑‑‑‑‑‑‑‑‑‑‑‑‑‑‑‑‑‑‑‑‑‑‑‑‑‑‑‑‑‑‑‑‑‑‑‑‑‑‑‑‑‑‑‑‑‑‑‑‑‑‑‑‑‑‑‑‑‑‑‑‑‑‑‑‑‑‑‑‑‑

Table

Incidence of Microscopic Observations

All Animals

Test Article (dosage) 1M 2M 3M 4M 1F 2F 3F 4F

‑‑‑‑‑‑‑‑‑‑‑‑‑‑‑‑‑‑‑‑‑‑‑‑‑‑‑ ‑‑‑‑‑‑‑‑ ‑‑ ‑‑ ‑‑ ‑‑ ‑‑ ‑‑ ‑‑ ‑‑

Benzonatate (PF‑00345410) mg/kg/day 0 10 30 90 0 5 15 50

‑‑‑‑‑‑‑‑‑‑‑‑‑‑‑‑‑‑‑‑‑‑‑‑‑‑‑‑‑‑‑‑‑‑‑‑‑‑‑‑‑‑‑‑‑‑‑‑‑‑‑‑‑‑‑‑‑‑‑‑‑‑‑‑‑‑‑‑‑‑‑‑‑‑‑‑‑‑‑‑‑‑‑‑‑‑‑‑‑‑‑‑‑‑‑‑‑‑‑‑‑‑‑‑‑‑‑‑

Tissue/ Group/Subgroup/Sex: 1/1/M 2/1/M 3/1/M 4/1/M 1/1/F 2/1/F 3/1/F 4/1/F

Observation Number of Animals:  55  50  50  55  55  50  50  55

‑‑‑‑‑‑‑‑‑‑‑‑‑‑‑‑‑‑‑‑‑‑‑‑‑‑‑‑‑‑‑‑‑‑‑‑‑‑‑‑‑‑‑‑‑‑‑‑‑‑‑‑‑‑‑‑‑‑‑‑‑‑‑‑‑‑‑‑‑‑‑‑‑‑‑‑‑‑‑‑‑‑‑‑‑‑‑‑‑‑‑‑‑‑‑‑‑‑‑‑‑‑‑‑‑‑‑‑

Kidney Number Examined:  55  50  50  55  55  50  50  55

Unremarkable:  12   8   8   5  13   9  10  12

B‑Infiltrating lipoma   0   0   0   0   0   1   0   0

C‑Hematopoietic neoplasm, see

body, whole for type 0 1 0 2 0 0 0 0

Cyst   1   1   3   1   1   2   0   0

Degeneration/necrosis, tubule   0   0   0   0   0   1   0   0

Degeneration/Regeneration, Tubule   1   0   0   0   0   0   0   0

Dilatation, pelvis   3   3   3   5   2   3   4   3

Dilatation, tubule(s)   1   0   0   0   1   2   0   0

Hemorrhage/hematoma   1   0   0   0   0   0   0   0

Hyaline droplet, tubule cell   0   1   0   1   0   0   0   1

Hyperplasia, transitional cell   6   3   4   6  32  20  16  22

Hyperplasia, tubule cell   0   2   0   0   0   1   0   0

Inflammation, chronic   1   0   0   0   0   0   0   0

Mineralization, pelvis  10   7   4   6  33  27  29  30

M‑Liposarcoma   0   1   0   0   0   0   0   0

Nephropathy, chronic progressive  41  39  41  45  24  29  24  26

Pigment, increased   0   0   0   0   2   1   0   1

Pyelonephritis   9   1   4   4   3   4   3   2

Lacrimal Gland Number Examined:   2   1   3   6   1   0   0   0

Unremarkable:   1   0   0   0   1   0   0   0

Ectopic Harderian gland   1   1   3   6   0   0   0   0

‑‑‑‑‑‑‑‑‑‑‑‑‑‑‑‑‑‑‑‑‑‑‑‑‑‑‑‑‑‑‑‑‑‑‑‑‑‑‑‑‑‑‑‑‑‑‑‑‑‑‑‑‑‑‑‑‑‑‑‑‑‑‑‑‑‑‑‑‑‑‑‑‑‑‑‑‑‑‑‑‑‑‑‑‑‑‑‑‑‑‑‑‑‑‑‑‑‑‑‑‑‑‑‑‑‑‑

Table

Incidence of Microscopic Observations

All Animals

Test Article (dosage) 1M 2M 3M 4M 1F 2F 3F 4F

‑‑‑‑‑‑‑‑‑‑‑‑‑‑‑‑‑‑‑‑‑‑‑‑‑‑‑ ‑‑‑‑‑‑‑‑ ‑‑ ‑‑ ‑‑ ‑‑ ‑‑ ‑‑ ‑‑ ‑‑

Benzonatate (PF‑00345410) mg/kg/day 0 10 30 90 0 5 15 50

‑‑‑‑‑‑‑‑‑‑‑‑‑‑‑‑‑‑‑‑‑‑‑‑‑‑‑‑‑‑‑‑‑‑‑‑‑‑‑‑‑‑‑‑‑‑‑‑‑‑‑‑‑‑‑‑‑‑‑‑‑‑‑‑‑‑‑‑‑‑‑‑‑‑‑‑‑‑‑‑‑‑‑‑‑‑‑‑‑‑‑‑‑‑‑‑‑‑‑‑‑‑‑‑‑‑‑‑

Tissue/ Group/Subgroup/Sex: 1/1/M 2/1/M 3/1/M 4/1/M 1/1/F 2/1/F 3/1/F 4/1/F

Observation Number of Animals:  55  50  50  55  55  50  50  55

‑‑‑‑‑‑‑‑‑‑‑‑‑‑‑‑‑‑‑‑‑‑‑‑‑‑‑‑‑‑‑‑‑‑‑‑‑‑‑‑‑‑‑‑‑‑‑‑‑‑‑‑‑‑‑‑‑‑‑‑‑‑‑‑‑‑‑‑‑‑‑‑‑‑‑‑‑‑‑‑‑‑‑‑‑‑‑‑‑‑‑‑‑‑‑‑‑‑‑‑‑‑‑‑‑‑‑‑

Liver Number Examined:  55  50  50  55  55  50  50  55

Unremarkable:   5  11   5   5   2   3   2   3

Angiectasis   5   5   3   3   7   6   4   5

B‑Adenoma, hepatocellular   2   0   1   0   2   0   1   2

Barbiturate lysis   0   0   0   2   0   0   0   1

C‑Hematopoietic neoplasm, see

body, whole for type 1 2 0 3 0 0 1 1

Congestion   0   0   0   0   1   0   0   0

Cyst, biliary   0   0   0   1   0   0   1   0

Degeneration, cystic   5   0   0   3   2   0   0   0

Fibrosis/biliary hyperplasia  12   6  13  13  23  19  18  21

Focus, cellular alteration,

basophilic 29 20 35 33 44 44 40 43

Focus, cellular alteration, clear   0   1   0   0   1   0   0   1

Focus, cellular alteration,

eosinophilic 16 15 18 14 8 6 6 8

Hematocyst   0   0   0   0   0   0   0   1

Hematopoiesis, extramedullary   2   4   0   0   7   4   5   2

Hemorrhage, centrilobular   0   0   1   0   0   0   0   1

Hyperplasia, Kupffer cell   0   1   0   1   0   1   1   1

Infiltrate, mononuclear cell  29  16  24  29  25  25  21  25

Karyomegaly, hepatocyte   0   0   0   0   1   0   2   1

Lipidosis, tension   0   0   0   1   0   0   0   0

M‑Carcinoma, hepatocellular   0   0   0   0   1   0   0   0

Mitosis, hepatocyte, increased   0   0   0   1   2   3   2   1

‑‑‑‑‑‑‑‑‑‑‑‑‑‑‑‑‑‑‑‑‑‑‑‑‑‑‑‑‑‑‑‑‑‑‑‑‑‑‑‑‑‑‑‑‑‑‑‑‑‑‑‑‑‑‑‑‑‑‑‑‑‑‑‑‑‑‑‑‑‑‑‑‑‑‑‑‑‑‑‑‑‑‑‑‑‑‑‑‑‑‑‑‑‑‑‑‑‑‑‑‑‑‑‑‑‑‑

Table

Incidence of Microscopic Observations

All Animals

Test Article (dosage) 1M 2M 3M 4M 1F 2F 3F 4F

‑‑‑‑‑‑‑‑‑‑‑‑‑‑‑‑‑‑‑‑‑‑‑‑‑‑‑ ‑‑‑‑‑‑‑‑ ‑‑ ‑‑ ‑‑ ‑‑ ‑‑ ‑‑ ‑‑ ‑‑

Benzonatate (PF‑00345410) mg/kg/day 0 10 30 90 0 5 15 50

‑‑‑‑‑‑‑‑‑‑‑‑‑‑‑‑‑‑‑‑‑‑‑‑‑‑‑‑‑‑‑‑‑‑‑‑‑‑‑‑‑‑‑‑‑‑‑‑‑‑‑‑‑‑‑‑‑‑‑‑‑‑‑‑‑‑‑‑‑‑‑‑‑‑‑‑‑‑‑‑‑‑‑‑‑‑‑‑‑‑‑‑‑‑‑‑‑‑‑‑‑‑‑‑‑‑‑‑

Tissue/ Group/Subgroup/Sex: 1/1/M 2/1/M 3/1/M 4/1/M 1/1/F 2/1/F 3/1/F 4/1/F

Observation Number of Animals:  55  50  50  55  55  50  50  55

‑‑‑‑‑‑‑‑‑‑‑‑‑‑‑‑‑‑‑‑‑‑‑‑‑‑‑‑‑‑‑‑‑‑‑‑‑‑‑‑‑‑‑‑‑‑‑‑‑‑‑‑‑‑‑‑‑‑‑‑‑‑‑‑‑‑‑‑‑‑‑‑‑‑‑‑‑‑‑‑‑‑‑‑‑‑‑‑‑‑‑‑‑‑‑‑‑‑‑‑‑‑‑‑‑‑‑‑

Liver Number Examined:  55  50  50  55  55  50  50  55

Unremarkable:   5  11   5   5   2   3   2   3

Multinucleated hepatocyte,

increased 0 0 0 0 4 0 1 4

N‑Carcinoma   0   0   0   0   0   0   0   1

Necrosis, hepatocyte   3   3   2   6   3   2   4   1

Necrosis/degeneration,

hepatocyte, centrilobular 1 1 2 1 1 2 1 2

N‑Sarcoma   0   1   0   0   0   0   0   0

Pigment, increased   1   0   0   0   1   3   0   1

Vacuolation, increased, hepatocyte   7  16  13   7  11   6   3   9

‑‑‑‑‑‑‑‑‑‑‑‑‑‑‑‑‑‑‑‑‑‑‑‑‑‑‑‑‑‑‑‑‑‑‑‑‑‑‑‑‑‑‑‑‑‑‑‑‑‑‑‑‑‑‑‑‑‑‑‑‑‑‑‑‑‑‑‑‑‑‑‑‑‑‑‑‑‑‑‑‑‑‑‑‑‑‑‑‑‑‑‑‑‑‑‑‑‑‑‑‑‑‑‑‑‑‑

Table

Incidence of Microscopic Observations

All Animals

Test Article (dosage) 1M 2M 3M 4M 1F 2F 3F 4F

‑‑‑‑‑‑‑‑‑‑‑‑‑‑‑‑‑‑‑‑‑‑‑‑‑‑‑ ‑‑‑‑‑‑‑‑ ‑‑ ‑‑ ‑‑ ‑‑ ‑‑ ‑‑ ‑‑ ‑‑

Benzonatate (PF‑00345410) mg/kg/day 0 10 30 90 0 5 15 50

‑‑‑‑‑‑‑‑‑‑‑‑‑‑‑‑‑‑‑‑‑‑‑‑‑‑‑‑‑‑‑‑‑‑‑‑‑‑‑‑‑‑‑‑‑‑‑‑‑‑‑‑‑‑‑‑‑‑‑‑‑‑‑‑‑‑‑‑‑‑‑‑‑‑‑‑‑‑‑‑‑‑‑‑‑‑‑‑‑‑‑‑‑‑‑‑‑‑‑‑‑‑‑‑‑‑‑‑

Tissue/ Group/Subgroup/Sex: 1/1/M 2/1/M 3/1/M 4/1/M 1/1/F 2/1/F 3/1/F 4/1/F

Observation Number of Animals:  55  50  50  55  55  50  50  55

‑‑‑‑‑‑‑‑‑‑‑‑‑‑‑‑‑‑‑‑‑‑‑‑‑‑‑‑‑‑‑‑‑‑‑‑‑‑‑‑‑‑‑‑‑‑‑‑‑‑‑‑‑‑‑‑‑‑‑‑‑‑‑‑‑‑‑‑‑‑‑‑‑‑‑‑‑‑‑‑‑‑‑‑‑‑‑‑‑‑‑‑‑‑‑‑‑‑‑‑‑‑‑‑‑‑‑‑

Lung Number Examined:  55  50  50  55  55  50  50  55

Unremarkable:  34  31  30  38  40  34  41  43

C‑Hematopoietic neoplasm, see

body, whole for type 1 2 0 2 0 1 0 2

C‑Vascular neoplasm, see body,

whole for type 0 1 0 0 0 0 0 0

Granuloma   5   3   2   1   0   2   0   1

Hemorrhage   4   1   1   1   1   0   0   0

Hyperplasia, epithelium, alveolus   3   1   1   0   0   0   0   0

Infiltrate, macrophages, alveolus   2   1   0   2   0   0   1   0

Infiltrate, macrophages,

vacuolated 13 12 15 14 11 11 7 10

Inflammation, acute   0   2   0   0   1   0   0   0

Inflammation, mixed cell   4   2   4   1   3   3   2   1

Leukocytosis   0   0   0   0   0   0   1   0

N‑Atriocaval mesothelioma   0   0   1   0   0   0   0   0

N‑Carcinoma   0   0   0   0   3   2   1   0

Pigment   0   1   1   0   0   0   1   0

Thrombus   0   0   0   0   1   0   0   0

X‑Osteosarcoma, metastatic,

primary unknown 0 0 1 0 0 0 0 0

‑‑‑‑‑‑‑‑‑‑‑‑‑‑‑‑‑‑‑‑‑‑‑‑‑‑‑‑‑‑‑‑‑‑‑‑‑‑‑‑‑‑‑‑‑‑‑‑‑‑‑‑‑‑‑‑‑‑‑‑‑‑‑‑‑‑‑‑‑‑‑‑‑‑‑‑‑‑‑‑‑‑‑‑‑‑‑‑‑‑‑‑‑‑‑‑‑‑‑‑‑‑‑‑‑‑‑

Table

Incidence of Microscopic Observations

All Animals

Test Article (dosage) 1M 2M 3M 4M 1F 2F 3F 4F

‑‑‑‑‑‑‑‑‑‑‑‑‑‑‑‑‑‑‑‑‑‑‑‑‑‑‑ ‑‑‑‑‑‑‑‑ ‑‑ ‑‑ ‑‑ ‑‑ ‑‑ ‑‑ ‑‑ ‑‑

Benzonatate (PF‑00345410) mg/kg/day 0 10 30 90 0 5 15 50

‑‑‑‑‑‑‑‑‑‑‑‑‑‑‑‑‑‑‑‑‑‑‑‑‑‑‑‑‑‑‑‑‑‑‑‑‑‑‑‑‑‑‑‑‑‑‑‑‑‑‑‑‑‑‑‑‑‑‑‑‑‑‑‑‑‑‑‑‑‑‑‑‑‑‑‑‑‑‑‑‑‑‑‑‑‑‑‑‑‑‑‑‑‑‑‑‑‑‑‑‑‑‑‑‑‑‑‑

Tissue/ Group/Subgroup/Sex: 1/1/M 2/1/M 3/1/M 4/1/M 1/1/F 2/1/F 3/1/F 4/1/F

Observation Number of Animals:  55  50  50  55  55  50  50  55

‑‑‑‑‑‑‑‑‑‑‑‑‑‑‑‑‑‑‑‑‑‑‑‑‑‑‑‑‑‑‑‑‑‑‑‑‑‑‑‑‑‑‑‑‑‑‑‑‑‑‑‑‑‑‑‑‑‑‑‑‑‑‑‑‑‑‑‑‑‑‑‑‑‑‑‑‑‑‑‑‑‑‑‑‑‑‑‑‑‑‑‑‑‑‑‑‑‑‑‑‑‑‑‑‑‑‑‑

Lymph Node,

Inguinal Number Examined: 45 41 41 49 50 41 36 45

Unremarkable: 42 39 41 47 47 39 35 42

C‑Hematopoietic neoplasm, see

body, whole for type 1 0 0 0 0 0 1 0

Dilatation, sinus   0   0   0   1   0   0   0   0

Erythrocytes, sinus   0   0   0   0   0   0   0   1

Hyperplasia, lymphocytes   2   2   0   2   2   2   0   1

N‑Carcinoma   0   0   0   0   1   0   0   1

Lymph Node,

Mesenteric Number Examined: 55 50 50 55 55 50 50 55

Unremarkable: 45 42 39 43 49 44 44 50

Angiectasis   0   0   1   1   0   0   0   0

C‑Hematopoietic neoplasm, see

body, whole for type 1 1 1 1 0 0 0 1

C‑Vascular neoplasm, see body,

whole for type 5 5 7 5 3 1 3 2

Dilatation, sinus   0   1   0   0   0   0   0   0

Erythrocytes, sinus, increased   4   1   2   6   3   2   5   2

Hyperplasia, lymphocytes   1   0   0   0   1   1   0   0

Inflammation   0   0   0   0   0   1   0   0

Necrosis, lymphocytes   0   0   0   0   1   1   0   0

N‑Sarcoma   0   0   0   1   0   0   0   0

‑‑‑‑‑‑‑‑‑‑‑‑‑‑‑‑‑‑‑‑‑‑‑‑‑‑‑‑‑‑‑‑‑‑‑‑‑‑‑‑‑‑‑‑‑‑‑‑‑‑‑‑‑‑‑‑‑‑‑‑‑‑‑‑‑‑‑‑‑‑‑‑‑‑‑‑‑‑‑‑‑‑‑‑‑‑‑‑‑‑‑‑‑‑‑‑‑‑‑‑‑‑‑‑‑‑‑

Table

Incidence of Microscopic Observations

All Animals

Test Article (dosage) 1M 2M 3M 4M 1F 2F 3F 4F

‑‑‑‑‑‑‑‑‑‑‑‑‑‑‑‑‑‑‑‑‑‑‑‑‑‑‑ ‑‑‑‑‑‑‑‑ ‑‑ ‑‑ ‑‑ ‑‑ ‑‑ ‑‑ ‑‑ ‑‑

Benzonatate (PF‑00345410) mg/kg/day 0 10 30 90 0 5 15 50

‑‑‑‑‑‑‑‑‑‑‑‑‑‑‑‑‑‑‑‑‑‑‑‑‑‑‑‑‑‑‑‑‑‑‑‑‑‑‑‑‑‑‑‑‑‑‑‑‑‑‑‑‑‑‑‑‑‑‑‑‑‑‑‑‑‑‑‑‑‑‑‑‑‑‑‑‑‑‑‑‑‑‑‑‑‑‑‑‑‑‑‑‑‑‑‑‑‑‑‑‑‑‑‑‑‑‑‑

Tissue/ Group/Subgroup/Sex: 1/1/M 2/1/M 3/1/M 4/1/M 1/1/F 2/1/F 3/1/F 4/1/F

Observation Number of Animals:  55  50  50  55  55  50  50  55

‑‑‑‑‑‑‑‑‑‑‑‑‑‑‑‑‑‑‑‑‑‑‑‑‑‑‑‑‑‑‑‑‑‑‑‑‑‑‑‑‑‑‑‑‑‑‑‑‑‑‑‑‑‑‑‑‑‑‑‑‑‑‑‑‑‑‑‑‑‑‑‑‑‑‑‑‑‑‑‑‑‑‑‑‑‑‑‑‑‑‑‑‑‑‑‑‑‑‑‑‑‑‑‑‑‑‑‑

Lymph Node, Other Number Examined:   3   2   3   3   0   1   0   3

Unremarkable:   0   0   0   0   0   0   0   0

Abscess   0   0   0   0   0   0   0   1

C‑Hematopoietic neoplasm, see

body, whole for type 1 0 0 1 0 0 0 0

Dilatation, sinus   1   0   0   0   0   0   0   0

Erythrocytes, sinus, increased   2   1   0   1   0   1   0   2

Hyperplasia, lymphocytes   0   0   2   1   0   0   0   1

Infiltrate, neutrophils   0   0   0   0   0   0   0   1

N‑Atriocaval mesothelioma   0   0   1   0   0   0   0   0

N‑Sarcoma   0   1   0   1   0   0   0   0

Pigment   0   0   0   0   0   1   0   0

Mammary Gland Number Examined:  52  41  40  40  55  50  49  54

Unremarkable:  44  41  37  33  15  11  19  10

Abscess   0   0   0   0   1   0   0   0

B‑Adenoma   0   0   0   0   1   0   3   2

B‑Fibroadenoma   1   0   0   0   5  13   7   6

Cyst/ectasia with inflammation   7   0   3   7  31  32  25  34

Granuloma   0   0   0   0   1   0   0   0

Hyperplasia   0   0   0   1  29  28  21  28

M‑Carcinoma   0   0   0   0   9   9   7  12

‑‑‑‑‑‑‑‑‑‑‑‑‑‑‑‑‑‑‑‑‑‑‑‑‑‑‑‑‑‑‑‑‑‑‑‑‑‑‑‑‑‑‑‑‑‑‑‑‑‑‑‑‑‑‑‑‑‑‑‑‑‑‑‑‑‑‑‑‑‑‑‑‑‑‑‑‑‑‑‑‑‑‑‑‑‑‑‑‑‑‑‑‑‑‑‑‑‑‑‑‑‑‑‑‑‑‑

Table

Incidence of Microscopic Observations

All Animals

Test Article (dosage) 1M 2M 3M 4M 1F 2F 3F 4F

‑‑‑‑‑‑‑‑‑‑‑‑‑‑‑‑‑‑‑‑‑‑‑‑‑‑‑ ‑‑‑‑‑‑‑‑ ‑‑ ‑‑ ‑‑ ‑‑ ‑‑ ‑‑ ‑‑ ‑‑

Benzonatate (PF‑00345410) mg/kg/day 0 10 30 90 0 5 15 50

‑‑‑‑‑‑‑‑‑‑‑‑‑‑‑‑‑‑‑‑‑‑‑‑‑‑‑‑‑‑‑‑‑‑‑‑‑‑‑‑‑‑‑‑‑‑‑‑‑‑‑‑‑‑‑‑‑‑‑‑‑‑‑‑‑‑‑‑‑‑‑‑‑‑‑‑‑‑‑‑‑‑‑‑‑‑‑‑‑‑‑‑‑‑‑‑‑‑‑‑‑‑‑‑‑‑‑‑

Tissue/ Group/Subgroup/Sex: 1/1/M 2/1/M 3/1/M 4/1/M 1/1/F 2/1/F 3/1/F 4/1/F

Observation Number of Animals:  55  50  50  55  55  50  50  55

‑‑‑‑‑‑‑‑‑‑‑‑‑‑‑‑‑‑‑‑‑‑‑‑‑‑‑‑‑‑‑‑‑‑‑‑‑‑‑‑‑‑‑‑‑‑‑‑‑‑‑‑‑‑‑‑‑‑‑‑‑‑‑‑‑‑‑‑‑‑‑‑‑‑‑‑‑‑‑‑‑‑‑‑‑‑‑‑‑‑‑‑‑‑‑‑‑‑‑‑‑‑‑‑‑‑‑‑

Mandibular

Salivary Gland Number Examined: 55 50 50 55 55 50 50 55

Unremarkable: 55 50 50 54 55 48 50 55

Inflammation, chronic‑active   0   0   0   0   0   1   0   0

M‑Carcinoma   0   0   0   1   0   0   0   0

M‑Sarcoma   0   0   0   0   0   1   0   0

Marrow, Sternum Number Examined:  55  50  50  55  55  50  50  55

Unremarkable:  43  41  47  44  44  42  42  47

C‑Hematopoietic neoplasm, see

body, whole for type 1 0 0 1 0 0 0 1

Hyperplasia, erythroid   0   0   0   1   1   1   0   0

Hyperplasia, myeloid  11   9   3   9  10   7   8   7

Mesentery Number Examined:   0   0   0   0   2   0   0   1

Unremarkable:   0   0   0   0   0   0   0   0

Hemorrhage   0   0   0   0   1   0   0   0

Inflammation   0   0   0   0   1   0   0   0

N‑Carcinoma   0   0   0   0   0   0   0   1

Necrosis   0   0   0   0   1   0   0   0

Muscle, Biceps

Femoris Number Examined: 55 50 50 55 55 50 50 55

Unremarkable: 37 28 19 30 37 40 42 35

Degeneration/regeneration  18  22  31  25  18  10   8  20

‑‑‑‑‑‑‑‑‑‑‑‑‑‑‑‑‑‑‑‑‑‑‑‑‑‑‑‑‑‑‑‑‑‑‑‑‑‑‑‑‑‑‑‑‑‑‑‑‑‑‑‑‑‑‑‑‑‑‑‑‑‑‑‑‑‑‑‑‑‑‑‑‑‑‑‑‑‑‑‑‑‑‑‑‑‑‑‑‑‑‑‑‑‑‑‑‑‑‑‑‑‑‑‑‑‑‑

Table

Incidence of Microscopic Observations

All Animals

Test Article (dosage) 1M 2M 3M 4M 1F 2F 3F 4F

‑‑‑‑‑‑‑‑‑‑‑‑‑‑‑‑‑‑‑‑‑‑‑‑‑‑‑ ‑‑‑‑‑‑‑‑ ‑‑ ‑‑ ‑‑ ‑‑ ‑‑ ‑‑ ‑‑ ‑‑

Benzonatate (PF‑00345410) mg/kg/day 0 10 30 90 0 5 15 50

‑‑‑‑‑‑‑‑‑‑‑‑‑‑‑‑‑‑‑‑‑‑‑‑‑‑‑‑‑‑‑‑‑‑‑‑‑‑‑‑‑‑‑‑‑‑‑‑‑‑‑‑‑‑‑‑‑‑‑‑‑‑‑‑‑‑‑‑‑‑‑‑‑‑‑‑‑‑‑‑‑‑‑‑‑‑‑‑‑‑‑‑‑‑‑‑‑‑‑‑‑‑‑‑‑‑‑‑

Tissue/ Group/Subgroup/Sex: 1/1/M 2/1/M 3/1/M 4/1/M 1/1/F 2/1/F 3/1/F 4/1/F

Observation Number of Animals:  55  50  50  55  55  50  50  55

‑‑‑‑‑‑‑‑‑‑‑‑‑‑‑‑‑‑‑‑‑‑‑‑‑‑‑‑‑‑‑‑‑‑‑‑‑‑‑‑‑‑‑‑‑‑‑‑‑‑‑‑‑‑‑‑‑‑‑‑‑‑‑‑‑‑‑‑‑‑‑‑‑‑‑‑‑‑‑‑‑‑‑‑‑‑‑‑‑‑‑‑‑‑‑‑‑‑‑‑‑‑‑‑‑‑‑‑

Muscle, Other Number Examined:   0   0   0   0   0   0   1   0

Unremarkable:   0   0   0   0   0   0   0   0

C‑Hematopoietic neoplasm, see

body, whole for type 0 0 0 0 0 0 1 0

Nasal Turbinate Number Examined:  55  50  50  55  54  50  49  55

Unremarkable:  54  49  50  54  54  50  47  55

Exudate, lumen   1   1   0   0   0   0   0   0

Inflammation   0   0   0   1   0   0   1   0

M‑Carcinoma, squamous cell   0   0   0   0   0   0   1   0

Nerve, Optic Number Examined:  55  50  50  55  55  50  50  55

Unremarkable:  55  50  50  54  54  50  49  55

Atrophy   0   0   0   0   1   0   1   0

Degeneration, axon   0   0   0   1   0   0   0   0

Nerve, Sciatic Number Examined:  55  50  50  55  55  50  50  55

Unremarkable:  55  50  49  54  44  49  46  48

Degeneration, axon, increased   0   0   1   1  11   1   4   7

‑‑‑‑‑‑‑‑‑‑‑‑‑‑‑‑‑‑‑‑‑‑‑‑‑‑‑‑‑‑‑‑‑‑‑‑‑‑‑‑‑‑‑‑‑‑‑‑‑‑‑‑‑‑‑‑‑‑‑‑‑‑‑‑‑‑‑‑‑‑‑‑‑‑‑‑‑‑‑‑‑‑‑‑‑‑‑‑‑‑‑‑‑‑‑‑‑‑‑‑‑‑‑‑‑‑‑

Table

Incidence of Microscopic Observations

All Animals

Test Article (dosage) 1M 2M 3M 4M 1F 2F 3F 4F

‑‑‑‑‑‑‑‑‑‑‑‑‑‑‑‑‑‑‑‑‑‑‑‑‑‑‑ ‑‑‑‑‑‑‑‑ ‑‑ ‑‑ ‑‑ ‑‑ ‑‑ ‑‑ ‑‑ ‑‑

Benzonatate (PF‑00345410) mg/kg/day 0 10 30 90 0 5 15 50

‑‑‑‑‑‑‑‑‑‑‑‑‑‑‑‑‑‑‑‑‑‑‑‑‑‑‑‑‑‑‑‑‑‑‑‑‑‑‑‑‑‑‑‑‑‑‑‑‑‑‑‑‑‑‑‑‑‑‑‑‑‑‑‑‑‑‑‑‑‑‑‑‑‑‑‑‑‑‑‑‑‑‑‑‑‑‑‑‑‑‑‑‑‑‑‑‑‑‑‑‑‑‑‑‑‑‑‑

Tissue/ Group/Subgroup/Sex: 1/1/M 2/1/M 3/1/M 4/1/M 1/1/F 2/1/F 3/1/F 4/1/F

Observation Number of Animals:  55  50  50  55  55  50  50  55

‑‑‑‑‑‑‑‑‑‑‑‑‑‑‑‑‑‑‑‑‑‑‑‑‑‑‑‑‑‑‑‑‑‑‑‑‑‑‑‑‑‑‑‑‑‑‑‑‑‑‑‑‑‑‑‑‑‑‑‑‑‑‑‑‑‑‑‑‑‑‑‑‑‑‑‑‑‑‑‑‑‑‑‑‑‑‑‑‑‑‑‑‑‑‑‑‑‑‑‑‑‑‑‑‑‑‑‑

Ovary Number Examined:   0   0   0   0  55  50  50  54

Unremarkable:   0   0   0   0  37  25  27  34

B‑Granulosa/theca cell tumor   0   0   0   0   2   1   1   4

C‑Vascular neoplasm, see body,

whole for type 0 0 0 0 0 1 1 0

Cyst, bursa   0   0   0   0   2   4   1   3

Cyst, corpus luteum   0   0   0   0   0   0   2   1

Cyst, follicle   0   0   0   0   0   1   5   0

Cyst, parovarian   0   0   0   0   9   6   2   7

Hyperplasia, interstitial cell   0   0   0   0   9  15  15   9

N‑Carcinoma   0   0   0   0   0   0   1   1

‑‑‑‑‑‑‑‑‑‑‑‑‑‑‑‑‑‑‑‑‑‑‑‑‑‑‑‑‑‑‑‑‑‑‑‑‑‑‑‑‑‑‑‑‑‑‑‑‑‑‑‑‑‑‑‑‑‑‑‑‑‑‑‑‑‑‑‑‑‑‑‑‑‑‑‑‑‑‑‑‑‑‑‑‑‑‑‑‑‑‑‑‑‑‑‑‑‑‑‑‑‑‑‑‑‑‑

Table

Incidence of Microscopic Observations

All Animals

Test Article (dosage) 1M 2M 3M 4M 1F 2F 3F 4F

‑‑‑‑‑‑‑‑‑‑‑‑‑‑‑‑‑‑‑‑‑‑‑‑‑‑‑ ‑‑‑‑‑‑‑‑ ‑‑ ‑‑ ‑‑ ‑‑ ‑‑ ‑‑ ‑‑ ‑‑

Benzonatate (PF‑00345410) mg/kg/day 0 10 30 90 0 5 15 50

‑‑‑‑‑‑‑‑‑‑‑‑‑‑‑‑‑‑‑‑‑‑‑‑‑‑‑‑‑‑‑‑‑‑‑‑‑‑‑‑‑‑‑‑‑‑‑‑‑‑‑‑‑‑‑‑‑‑‑‑‑‑‑‑‑‑‑‑‑‑‑‑‑‑‑‑‑‑‑‑‑‑‑‑‑‑‑‑‑‑‑‑‑‑‑‑‑‑‑‑‑‑‑‑‑‑‑‑

Tissue/ Group/Subgroup/Sex: 1/1/M 2/1/M 3/1/M 4/1/M 1/1/F 2/1/F 3/1/F 4/1/F

Observation Number of Animals:  55  50  50  55  55  50  50  55

‑‑‑‑‑‑‑‑‑‑‑‑‑‑‑‑‑‑‑‑‑‑‑‑‑‑‑‑‑‑‑‑‑‑‑‑‑‑‑‑‑‑‑‑‑‑‑‑‑‑‑‑‑‑‑‑‑‑‑‑‑‑‑‑‑‑‑‑‑‑‑‑‑‑‑‑‑‑‑‑‑‑‑‑‑‑‑‑‑‑‑‑‑‑‑‑‑‑‑‑‑‑‑‑‑‑‑‑

Pancreas Number Examined:  55  50  50  55  55  50  50  55

Unremarkable:  10  13   4   8  26  26  34  31

Alteration, basophilic   3   2   2   6   2   0   2   2

Atrophy, acinar   5   5   4   8   3   5   1   4

B‑Adenoma, islet cell   1   1   1   0   2   0   2   0

C‑Hematopoietic neoplasm, see

body, whole for type 0 0 0 1 1 0 0 1

C‑Vascular neoplasm, see body,

whole for type 0 0 0 1 0 0 0 0

Depletion, zymogen   1   1   4   0   2   1   1   1

Ectopic spleen   0   0   0   0   0   0   0   1

Hyperplasia, acinar cell   0   0   0   2   0   0   0   0

Hyperplasia, islet cell  41  36  43  43  17  19   6  15

Infiltrate, mononuclear cell   2   8  12   7   4   4   5   6

Inflammation, acute   0   0   0   1   0   0   0   0

Inflammation, chronic   6   1   4   6   4   2   0   2

Inflammation, vessel   0   0   1   0   0   0   1   0

M‑Carcinoma, acinar Cell   0   0   0   0   0   1   0   0

M‑Carcinoma, islet cell   1   0   0   0   0   0   0   1

N‑Carcinoma   0   0   0   0   1   0   1   2

N‑Sarcoma   0   0   0   1   0   0   0   0

Thrombus   0   0   0   0   0   0   1   0

‑‑‑‑‑‑‑‑‑‑‑‑‑‑‑‑‑‑‑‑‑‑‑‑‑‑‑‑‑‑‑‑‑‑‑‑‑‑‑‑‑‑‑‑‑‑‑‑‑‑‑‑‑‑‑‑‑‑‑‑‑‑‑‑‑‑‑‑‑‑‑‑‑‑‑‑‑‑‑‑‑‑‑‑‑‑‑‑‑‑‑‑‑‑‑‑‑‑‑‑‑‑‑‑‑‑‑

Table

Incidence of Microscopic Observations

All Animals

Test Article (dosage) 1M 2M 3M 4M 1F 2F 3F 4F

‑‑‑‑‑‑‑‑‑‑‑‑‑‑‑‑‑‑‑‑‑‑‑‑‑‑‑ ‑‑‑‑‑‑‑‑ ‑‑ ‑‑ ‑‑ ‑‑ ‑‑ ‑‑ ‑‑ ‑‑

Benzonatate (PF‑00345410) mg/kg/day 0 10 30 90 0 5 15 50

‑‑‑‑‑‑‑‑‑‑‑‑‑‑‑‑‑‑‑‑‑‑‑‑‑‑‑‑‑‑‑‑‑‑‑‑‑‑‑‑‑‑‑‑‑‑‑‑‑‑‑‑‑‑‑‑‑‑‑‑‑‑‑‑‑‑‑‑‑‑‑‑‑‑‑‑‑‑‑‑‑‑‑‑‑‑‑‑‑‑‑‑‑‑‑‑‑‑‑‑‑‑‑‑‑‑‑‑

Tissue/ Group/Subgroup/Sex: 1/1/M 2/1/M 3/1/M 4/1/M 1/1/F 2/1/F 3/1/F 4/1/F

Observation Number of Animals:  55  50  50  55  55  50  50  55

‑‑‑‑‑‑‑‑‑‑‑‑‑‑‑‑‑‑‑‑‑‑‑‑‑‑‑‑‑‑‑‑‑‑‑‑‑‑‑‑‑‑‑‑‑‑‑‑‑‑‑‑‑‑‑‑‑‑‑‑‑‑‑‑‑‑‑‑‑‑‑‑‑‑‑‑‑‑‑‑‑‑‑‑‑‑‑‑‑‑‑‑‑‑‑‑‑‑‑‑‑‑‑‑‑‑‑‑

Parathyroid Number Examined:  54  47  49  53  54  50  50  53

Unremarkable:  51  42  46  49  52  49  50  53

B‑Adenoma   0   1   1   1   1   1   0   0

Hyperplasia   3   4   2   3   2   0   0   0

Pituitary Number Examined:  54  50  50  55  55  50  50  55

Unremarkable:  18  19  18  23   6   8  11   9

B‑Adenoma  22  21  21  23  41  38  37  41

Cyst, craniopharyngeal   2   1   0   1   0   0   0   0

Hematopoiesis, increased   0   0   0   0   0   0   0   1

Hemorrhage   0   0   0   0   0   0   0   1

Hyperplasia  13  11  12  10   9   5   3   5

Hyperplasia, erythroid   0   0   0   0   0   0   0   1

I‑Sarcoma   1   0   0   0   0   0   0   0

M‑Carcinoma   0   0   0   0   2   0   0   1

Preputial Gland Number Examined:   1   1   2   0   0   0   0   0

Unremarkable:   0   0   0   0   0   0   0   0

Ectasia   0   0   1   0   0   0   0   0

Inflammation, chronic‑active   1   1   2   0   0   0   0   0

‑‑‑‑‑‑‑‑‑‑‑‑‑‑‑‑‑‑‑‑‑‑‑‑‑‑‑‑‑‑‑‑‑‑‑‑‑‑‑‑‑‑‑‑‑‑‑‑‑‑‑‑‑‑‑‑‑‑‑‑‑‑‑‑‑‑‑‑‑‑‑‑‑‑‑‑‑‑‑‑‑‑‑‑‑‑‑‑‑‑‑‑‑‑‑‑‑‑‑‑‑‑‑‑‑‑‑

Table

Incidence of Microscopic Observations

All Animals

Test Article (dosage) 1M 2M 3M 4M 1F 2F 3F 4F

‑‑‑‑‑‑‑‑‑‑‑‑‑‑‑‑‑‑‑‑‑‑‑‑‑‑‑ ‑‑‑‑‑‑‑‑ ‑‑ ‑‑ ‑‑ ‑‑ ‑‑ ‑‑ ‑‑ ‑‑

Benzonatate (PF‑00345410) mg/kg/day 0 10 30 90 0 5 15 50

‑‑‑‑‑‑‑‑‑‑‑‑‑‑‑‑‑‑‑‑‑‑‑‑‑‑‑‑‑‑‑‑‑‑‑‑‑‑‑‑‑‑‑‑‑‑‑‑‑‑‑‑‑‑‑‑‑‑‑‑‑‑‑‑‑‑‑‑‑‑‑‑‑‑‑‑‑‑‑‑‑‑‑‑‑‑‑‑‑‑‑‑‑‑‑‑‑‑‑‑‑‑‑‑‑‑‑‑

Tissue/ Group/Subgroup/Sex: 1/1/M 2/1/M 3/1/M 4/1/M 1/1/F 2/1/F 3/1/F 4/1/F

Observation Number of Animals:  55  50  50  55  55  50  50  55

‑‑‑‑‑‑‑‑‑‑‑‑‑‑‑‑‑‑‑‑‑‑‑‑‑‑‑‑‑‑‑‑‑‑‑‑‑‑‑‑‑‑‑‑‑‑‑‑‑‑‑‑‑‑‑‑‑‑‑‑‑‑‑‑‑‑‑‑‑‑‑‑‑‑‑‑‑‑‑‑‑‑‑‑‑‑‑‑‑‑‑‑‑‑‑‑‑‑‑‑‑‑‑‑‑‑‑‑

Prostate Number Examined:  55  50  50  55   0   0   0   0

Unremarkable:  24  25  16  28   0   0   0   0

B‑Adenoma   0   0   1   1   0   0   0   0

Hyperplasia   1   1   3   3   0   0   0   0

Inflammation, chronic‑active  29  24  32  27   0   0   0   0

M‑Carcinoma   1   0   1   0   0   0   0   0

Seminal Vesicle Number Examined:  55  50  50  55   0   0   0   0

Unremarkable:  48  46  47  51   0   0   0   0

Decreased secretion   5   3   1   3   0   0   0   0

Hyperplasia   1   0   1   1   0   0   0   0

Inflammation, chronic‑active   3   1   2   0   0   0   0   0

‑‑‑‑‑‑‑‑‑‑‑‑‑‑‑‑‑‑‑‑‑‑‑‑‑‑‑‑‑‑‑‑‑‑‑‑‑‑‑‑‑‑‑‑‑‑‑‑‑‑‑‑‑‑‑‑‑‑‑‑‑‑‑‑‑‑‑‑‑‑‑‑‑‑‑‑‑‑‑‑‑‑‑‑‑‑‑‑‑‑‑‑‑‑‑‑‑‑‑‑‑‑‑‑‑‑‑

Table

Incidence of Microscopic Observations

All Animals

Test Article (dosage) 1M 2M 3M 4M 1F 2F 3F 4F

‑‑‑‑‑‑‑‑‑‑‑‑‑‑‑‑‑‑‑‑‑‑‑‑‑‑‑ ‑‑‑‑‑‑‑‑ ‑‑ ‑‑ ‑‑ ‑‑ ‑‑ ‑‑ ‑‑ ‑‑

Benzonatate (PF‑00345410) mg/kg/day 0 10 30 90 0 5 15 50

‑‑‑‑‑‑‑‑‑‑‑‑‑‑‑‑‑‑‑‑‑‑‑‑‑‑‑‑‑‑‑‑‑‑‑‑‑‑‑‑‑‑‑‑‑‑‑‑‑‑‑‑‑‑‑‑‑‑‑‑‑‑‑‑‑‑‑‑‑‑‑‑‑‑‑‑‑‑‑‑‑‑‑‑‑‑‑‑‑‑‑‑‑‑‑‑‑‑‑‑‑‑‑‑‑‑‑‑

Tissue/ Group/Subgroup/Sex: 1/1/M 2/1/M 3/1/M 4/1/M 1/1/F 2/1/F 3/1/F 4/1/F

Observation Number of Animals:  55  50  50  55  55  50  50  55

‑‑‑‑‑‑‑‑‑‑‑‑‑‑‑‑‑‑‑‑‑‑‑‑‑‑‑‑‑‑‑‑‑‑‑‑‑‑‑‑‑‑‑‑‑‑‑‑‑‑‑‑‑‑‑‑‑‑‑‑‑‑‑‑‑‑‑‑‑‑‑‑‑‑‑‑‑‑‑‑‑‑‑‑‑‑‑‑‑‑‑‑‑‑‑‑‑‑‑‑‑‑‑‑‑‑‑‑

Skin/Subcutis Number Examined:  55  49  50  55  55  50  50  54

Unremarkable:  38  37  43  37  48  45  42  46

B‑Adenoma, sebaceous   0   0   1   1   0   0   0   0

B‑Basal cell tumor   1   1   0   0   1   0   0   0

B‑Fibroma   2   3   2   0   0   0   0   1

B‑Hibernoma   1   0   0   0   0   0   0   0

B‑Keratoacanthoma   5   0   1   3   1   0   0   0

B‑Myxoma   0   0   0   0   0   0   1   0

B‑Papilloma, squamous cell   2   1   1   2   0   0   1   0

B‑Trichoepithelioma   0   1   0   1   0   0   0   0

C‑Hematopoietic neoplasm, see

body, whole for type 1 2 0 0 1 1 0 1

C‑Vascular neoplasm, see body,

whole for type 1 0 0 1 1 0 0 0

Cyst, epidermal inclusion   0   0   0   0   0   1   0   0

Erosion/ulcer   1   3   1   1   0   2   2   3

Hemorrhage   0   0   0   0   1   0   0   0

Inflammation, chronic‑active   4   3   1   6   1   3   4   6

M‑Carcinoma   1   0   0   1   0   0   0   0

M‑Carcinoma, squamous cell   0   0   0   2   0   0   0   0

M‑Fibrosarcoma   0   1   0   2   0   0   2   0

M‑Liposarcoma   0   1   0   0   0   0   0   0

M‑Malignant schwannoma   0   0   1   0   1   1   0   0

M‑Sarcoma   1   0   0   0   0   0   0   0

‑‑‑‑‑‑‑‑‑‑‑‑‑‑‑‑‑‑‑‑‑‑‑‑‑‑‑‑‑‑‑‑‑‑‑‑‑‑‑‑‑‑‑‑‑‑‑‑‑‑‑‑‑‑‑‑‑‑‑‑‑‑‑‑‑‑‑‑‑‑‑‑‑‑‑‑‑‑‑‑‑‑‑‑‑‑‑‑‑‑‑‑‑‑‑‑‑‑‑‑‑‑‑‑‑‑‑

Table

Incidence of Microscopic Observations

All Animals

Test Article (dosage) 1M 2M 3M 4M 1F 2F 3F 4F

‑‑‑‑‑‑‑‑‑‑‑‑‑‑‑‑‑‑‑‑‑‑‑‑‑‑‑ ‑‑‑‑‑‑‑‑ ‑‑ ‑‑ ‑‑ ‑‑ ‑‑ ‑‑ ‑‑ ‑‑

Benzonatate (PF‑00345410) mg/kg/day 0 10 30 90 0 5 15 50

‑‑‑‑‑‑‑‑‑‑‑‑‑‑‑‑‑‑‑‑‑‑‑‑‑‑‑‑‑‑‑‑‑‑‑‑‑‑‑‑‑‑‑‑‑‑‑‑‑‑‑‑‑‑‑‑‑‑‑‑‑‑‑‑‑‑‑‑‑‑‑‑‑‑‑‑‑‑‑‑‑‑‑‑‑‑‑‑‑‑‑‑‑‑‑‑‑‑‑‑‑‑‑‑‑‑‑‑

Tissue/ Group/Subgroup/Sex: 1/1/M 2/1/M 3/1/M 4/1/M 1/1/F 2/1/F 3/1/F 4/1/F

Observation Number of Animals:  55  50  50  55  55  50  50  55

‑‑‑‑‑‑‑‑‑‑‑‑‑‑‑‑‑‑‑‑‑‑‑‑‑‑‑‑‑‑‑‑‑‑‑‑‑‑‑‑‑‑‑‑‑‑‑‑‑‑‑‑‑‑‑‑‑‑‑‑‑‑‑‑‑‑‑‑‑‑‑‑‑‑‑‑‑‑‑‑‑‑‑‑‑‑‑‑‑‑‑‑‑‑‑‑‑‑‑‑‑‑‑‑‑‑‑‑

Spinal Cord Number Examined:  55  50  50  55  55  50  50  55

Unremarkable:  50  42  44  49  52  45  48  51

B‑Meningioma   0   1   0   0   0   0   0   0

Degeneration, axon, increased   4   8   6   5   3   5   2   4

Gliosis   0   0   0   1   0   0   0   0

Hemorrhage   1   0   0   0   0   0   0   0

Malacia   1   0   0   0   0   0   0   0

Spleen Number Examined:  55  50  50  55  55  50  50  55

Unremarkable:  27  34  29  27  25  16  19  21

C‑Hematopoietic neoplasm, see

body, whole for type 1 2 0 1 0 0 0 1

Congestion   0   0   0   0   0   1   0   0

C‑Vascular neoplasm, see body,

whole for type 1 2 0 0 0 0 0 0

Fibrosis, capsule   0   0   1   1   0   1   0   0

Hematoma   0   0   0   0   0   0   0   1

Hematopoiesis, extramedullary,

increased 26 13 19 27 25 27 29 29

Pigment, increased   1   1   0   0   5   6   2   4

Thrombus   0   0   1   0   0   0   0   0

X‑Osteosarcoma, metastatic,

primary unknown 0 0 1 0 0 0 0 0

‑‑‑‑‑‑‑‑‑‑‑‑‑‑‑‑‑‑‑‑‑‑‑‑‑‑‑‑‑‑‑‑‑‑‑‑‑‑‑‑‑‑‑‑‑‑‑‑‑‑‑‑‑‑‑‑‑‑‑‑‑‑‑‑‑‑‑‑‑‑‑‑‑‑‑‑‑‑‑‑‑‑‑‑‑‑‑‑‑‑‑‑‑‑‑‑‑‑‑‑‑‑‑‑‑‑‑

Table

Incidence of Microscopic Observations

All Animals

Test Article (dosage) 1M 2M 3M 4M 1F 2F 3F 4F

‑‑‑‑‑‑‑‑‑‑‑‑‑‑‑‑‑‑‑‑‑‑‑‑‑‑‑ ‑‑‑‑‑‑‑‑ ‑‑ ‑‑ ‑‑ ‑‑ ‑‑ ‑‑ ‑‑ ‑‑

Benzonatate (PF‑00345410) mg/kg/day 0 10 30 90 0 5 15 50

‑‑‑‑‑‑‑‑‑‑‑‑‑‑‑‑‑‑‑‑‑‑‑‑‑‑‑‑‑‑‑‑‑‑‑‑‑‑‑‑‑‑‑‑‑‑‑‑‑‑‑‑‑‑‑‑‑‑‑‑‑‑‑‑‑‑‑‑‑‑‑‑‑‑‑‑‑‑‑‑‑‑‑‑‑‑‑‑‑‑‑‑‑‑‑‑‑‑‑‑‑‑‑‑‑‑‑‑

Tissue/ Group/Subgroup/Sex: 1/1/M 2/1/M 3/1/M 4/1/M 1/1/F 2/1/F 3/1/F 4/1/F

Observation Number of Animals:  55  50  50  55  55  50  50  55

‑‑‑‑‑‑‑‑‑‑‑‑‑‑‑‑‑‑‑‑‑‑‑‑‑‑‑‑‑‑‑‑‑‑‑‑‑‑‑‑‑‑‑‑‑‑‑‑‑‑‑‑‑‑‑‑‑‑‑‑‑‑‑‑‑‑‑‑‑‑‑‑‑‑‑‑‑‑‑‑‑‑‑‑‑‑‑‑‑‑‑‑‑‑‑‑‑‑‑‑‑‑‑‑‑‑‑‑

Stomach, Glandular Number Examined:  55  49  50  55  55  50  50  55

Unremarkable:  51  48  39  53  55  49  46  53

Cyst, squamous cell   0   0   0   1   0   0   0   0

Degeneration, muscle   1   0   1   0   0   0   0   0

Erosion/ulcer   0   1   3   1   0   0   0   2

Hemorrhage   0   0   7   0   0   0   2   0

Hyperplasia, epithelium   1   0   0   0   0   0   0   0

Inflammation, chronic‑active   1   0   0   0   0   1   0   0

Inflammation, granulomatous   0   0   0   1   0   0   0   0

Inflammation, vessel   0   0   1   0   0   0   1   0

M‑Carcinoma   1   0   0   0   0   0   0   0

N‑Carcinoma   0   0   0   0   0   0   1   0

Stomach,

Nonglandular Number Examined: 55 49 50 55 55 50 50 55

Unremarkable: 49 46 48 53 52 47 47 52

Cyst   0   0   0   0   0   0   2   0

Hyperplasia, epithelium   5   1   1   1   2   1   2   0

Inflammation, chronic‑active   6   2   0   2   2   3   0   2

M‑Sarcoma   0   1   0   0   0   0   0   0

Ulcer/erosion   4   2   1   1   2   2   0   2

Sublingual

Salivary Gland Number Examined: 0 0 1 0 0 0 0 0

Unremarkable: 0 0 0 0 0 0 0 0

Hyperplasia   0   0   1   0   0   0   0   0

‑‑‑‑‑‑‑‑‑‑‑‑‑‑‑‑‑‑‑‑‑‑‑‑‑‑‑‑‑‑‑‑‑‑‑‑‑‑‑‑‑‑‑‑‑‑‑‑‑‑‑‑‑‑‑‑‑‑‑‑‑‑‑‑‑‑‑‑‑‑‑‑‑‑‑‑‑‑‑‑‑‑‑‑‑‑‑‑‑‑‑‑‑‑‑‑‑‑‑‑‑‑‑‑‑‑‑

Table

Incidence of Microscopic Observations

All Animals

Test Article (dosage) 1M 2M 3M 4M 1F 2F 3F 4F

‑‑‑‑‑‑‑‑‑‑‑‑‑‑‑‑‑‑‑‑‑‑‑‑‑‑‑ ‑‑‑‑‑‑‑‑ ‑‑ ‑‑ ‑‑ ‑‑ ‑‑ ‑‑ ‑‑ ‑‑

Benzonatate (PF‑00345410) mg/kg/day 0 10 30 90 0 5 15 50

‑‑‑‑‑‑‑‑‑‑‑‑‑‑‑‑‑‑‑‑‑‑‑‑‑‑‑‑‑‑‑‑‑‑‑‑‑‑‑‑‑‑‑‑‑‑‑‑‑‑‑‑‑‑‑‑‑‑‑‑‑‑‑‑‑‑‑‑‑‑‑‑‑‑‑‑‑‑‑‑‑‑‑‑‑‑‑‑‑‑‑‑‑‑‑‑‑‑‑‑‑‑‑‑‑‑‑‑

Tissue/ Group/Subgroup/Sex: 1/1/M 2/1/M 3/1/M 4/1/M 1/1/F 2/1/F 3/1/F 4/1/F

Observation Number of Animals:  55  50  50  55  55  50  50  55

‑‑‑‑‑‑‑‑‑‑‑‑‑‑‑‑‑‑‑‑‑‑‑‑‑‑‑‑‑‑‑‑‑‑‑‑‑‑‑‑‑‑‑‑‑‑‑‑‑‑‑‑‑‑‑‑‑‑‑‑‑‑‑‑‑‑‑‑‑‑‑‑‑‑‑‑‑‑‑‑‑‑‑‑‑‑‑‑‑‑‑‑‑‑‑‑‑‑‑‑‑‑‑‑‑‑‑‑

Tail Number Examined:   0   1   0   0   0   0   0   0

Unremarkable:   0   0   0   0   0   0   0   0

M‑Rhabdomyosarcoma (muscle tumor)   0   1   0   0   0   0   0   0

Testis Number Examined:  55  50  50  55   0   0   0   0

Unremarkable:  42  43  45  50   0   0   0   0

Atrophy/degeneration   9   5   2   3   0   0   0   0

B‑Interstitial cell tumor   2   3   2   1   0   0   0   0

C‑Mesothelioma, see body, whole   0   1   0   1   0   0   0   0

Edema   1   0   1   1   0   0   0   0

Granuloma, sperm   2   0   0   0   0   0   0   0

Thoracic Cavity Number Examined:   0   0   1   0   0   0   0   0

Unremarkable:   0   0   0   0   0   0   0   0

N‑Atriocaval mesothelioma   0   0   1   0   0   0   0   0

‑‑‑‑‑‑‑‑‑‑‑‑‑‑‑‑‑‑‑‑‑‑‑‑‑‑‑‑‑‑‑‑‑‑‑‑‑‑‑‑‑‑‑‑‑‑‑‑‑‑‑‑‑‑‑‑‑‑‑‑‑‑‑‑‑‑‑‑‑‑‑‑‑‑‑‑‑‑‑‑‑‑‑‑‑‑‑‑‑‑‑‑‑‑‑‑‑‑‑‑‑‑‑‑‑‑‑

Table

Incidence of Microscopic Observations

All Animals

Test Article (dosage) 1M 2M 3M 4M 1F 2F 3F 4F

‑‑‑‑‑‑‑‑‑‑‑‑‑‑‑‑‑‑‑‑‑‑‑‑‑‑‑ ‑‑‑‑‑‑‑‑ ‑‑ ‑‑ ‑‑ ‑‑ ‑‑ ‑‑ ‑‑ ‑‑

Benzonatate (PF‑00345410) mg/kg/day 0 10 30 90 0 5 15 50

‑‑‑‑‑‑‑‑‑‑‑‑‑‑‑‑‑‑‑‑‑‑‑‑‑‑‑‑‑‑‑‑‑‑‑‑‑‑‑‑‑‑‑‑‑‑‑‑‑‑‑‑‑‑‑‑‑‑‑‑‑‑‑‑‑‑‑‑‑‑‑‑‑‑‑‑‑‑‑‑‑‑‑‑‑‑‑‑‑‑‑‑‑‑‑‑‑‑‑‑‑‑‑‑‑‑‑‑

Tissue/ Group/Subgroup/Sex: 1/1/M 2/1/M 3/1/M 4/1/M 1/1/F 2/1/F 3/1/F 4/1/F

Observation Number of Animals:  55  50  50  55  55  50  50  55

‑‑‑‑‑‑‑‑‑‑‑‑‑‑‑‑‑‑‑‑‑‑‑‑‑‑‑‑‑‑‑‑‑‑‑‑‑‑‑‑‑‑‑‑‑‑‑‑‑‑‑‑‑‑‑‑‑‑‑‑‑‑‑‑‑‑‑‑‑‑‑‑‑‑‑‑‑‑‑‑‑‑‑‑‑‑‑‑‑‑‑‑‑‑‑‑‑‑‑‑‑‑‑‑‑‑‑‑

Thymus Number Examined:  54  49  49  54  55  46  50  53

Unremarkable:  41  35  36  42  35  31  34  35

B‑Thymoma   0   0   2   2   3   4   2   3

C‑Hematopoietic neoplasm, see

body, whole for type 2 3 2 3 0 0 2 0

C‑Mesothelioma, see body whole   0   0   0   1   0   0   0   0

C‑Vascular neoplasm, see body,

whole for type 0 0 0 0 0 1 0 0

Cyst, increased   0   0   0   0   2   0   2   4

Hematopoiesis, extramedullary   0   0   0   0   0   0   1   0

Hemorrhage   3   3   3   0   3   1   1   5

Hyperplasia, epithelium   6   7   4   5   9   7   6  10

Hyperplasia, lymphocyte   3   5   7   5   9   6   5   5

Inflammation, chronic‑active   0   0   0   0   1   0   1   0

Necrosis, lymphocytes   0   1   0   0   1   1   2   1

‑‑‑‑‑‑‑‑‑‑‑‑‑‑‑‑‑‑‑‑‑‑‑‑‑‑‑‑‑‑‑‑‑‑‑‑‑‑‑‑‑‑‑‑‑‑‑‑‑‑‑‑‑‑‑‑‑‑‑‑‑‑‑‑‑‑‑‑‑‑‑‑‑‑‑‑‑‑‑‑‑‑‑‑‑‑‑‑‑‑‑‑‑‑‑‑‑‑‑‑‑‑‑‑‑‑‑

Table

Incidence of Microscopic Observations

All Animals

Test Article (dosage) 1M 2M 3M 4M 1F 2F 3F 4F

‑‑‑‑‑‑‑‑‑‑‑‑‑‑‑‑‑‑‑‑‑‑‑‑‑‑‑ ‑‑‑‑‑‑‑‑ ‑‑ ‑‑ ‑‑ ‑‑ ‑‑ ‑‑ ‑‑ ‑‑

Benzonatate (PF‑00345410) mg/kg/day 0 10 30 90 0 5 15 50

‑‑‑‑‑‑‑‑‑‑‑‑‑‑‑‑‑‑‑‑‑‑‑‑‑‑‑‑‑‑‑‑‑‑‑‑‑‑‑‑‑‑‑‑‑‑‑‑‑‑‑‑‑‑‑‑‑‑‑‑‑‑‑‑‑‑‑‑‑‑‑‑‑‑‑‑‑‑‑‑‑‑‑‑‑‑‑‑‑‑‑‑‑‑‑‑‑‑‑‑‑‑‑‑‑‑‑‑

Tissue/ Group/Subgroup/Sex: 1/1/M 2/1/M 3/1/M 4/1/M 1/1/F 2/1/F 3/1/F 4/1/F

Observation Number of Animals:  55  50  50  55  55  50  50  55

‑‑‑‑‑‑‑‑‑‑‑‑‑‑‑‑‑‑‑‑‑‑‑‑‑‑‑‑‑‑‑‑‑‑‑‑‑‑‑‑‑‑‑‑‑‑‑‑‑‑‑‑‑‑‑‑‑‑‑‑‑‑‑‑‑‑‑‑‑‑‑‑‑‑‑‑‑‑‑‑‑‑‑‑‑‑‑‑‑‑‑‑‑‑‑‑‑‑‑‑‑‑‑‑‑‑‑‑

Thyroid Number Examined:  55  50  50  55  55  50  50  55

Unremarkable:   6   4   1   3   5   9   2   8

B‑Adenoma, C‑cell   5   7   7   8   7  12   8   6

B‑Adenoma, follicular cell   7  13  10  10   2   4   3   2

Cyst, follicle   8   8   4   2   8   7   4   5

Hyperplasia, diffuse, C‑cell  47  44  46  52  46  37  47  45

Hyperplasia, focal, C‑cell   5   4   5   5   2   4   5   4

Hyperplasia, follicular cell  12  14  11   7   2   5   3   2

Infiltrate, mononuclear cell   0   0   1   1   0   1   0   0

Inflammation, chronic‑active   0   0   0   0   0   1   0   0

M‑Carcinoma, C‑cell   0   3   0   0   1   0   0   0

M‑Carcinoma, follicular cell   6   1   3   5   1   0   2   1

Tongue Number Examined:  55  50  50  55  55  50  50  55

Unremarkable:  55  50  48  55  55  50  49  54

Erosion/ulcer   0   0   1   0   0   0   0   0

Infiltrate, mononuclear cell   0   0   1   0   0   0   0   1

Inflammation, chronic‑active   0   0   1   0   0   0   1   0

Tooth, Other Number Examined:   0   0   1   0   0   0   0   0

Unremarkable:   0   0   0   0   0   0   0   0

M‑Osteosarcoma   0   0   1   0   0   0   0   0

‑‑‑‑‑‑‑‑‑‑‑‑‑‑‑‑‑‑‑‑‑‑‑‑‑‑‑‑‑‑‑‑‑‑‑‑‑‑‑‑‑‑‑‑‑‑‑‑‑‑‑‑‑‑‑‑‑‑‑‑‑‑‑‑‑‑‑‑‑‑‑‑‑‑‑‑‑‑‑‑‑‑‑‑‑‑‑‑‑‑‑‑‑‑‑‑‑‑‑‑‑‑‑‑‑‑‑

Table

Incidence of Microscopic Observations

All Animals

Test Article (dosage) 1M 2M 3M 4M 1F 2F 3F 4F

‑‑‑‑‑‑‑‑‑‑‑‑‑‑‑‑‑‑‑‑‑‑‑‑‑‑‑ ‑‑‑‑‑‑‑‑ ‑‑ ‑‑ ‑‑ ‑‑ ‑‑ ‑‑ ‑‑ ‑‑

Benzonatate (PF‑00345410) mg/kg/day 0 10 30 90 0 5 15 50

‑‑‑‑‑‑‑‑‑‑‑‑‑‑‑‑‑‑‑‑‑‑‑‑‑‑‑‑‑‑‑‑‑‑‑‑‑‑‑‑‑‑‑‑‑‑‑‑‑‑‑‑‑‑‑‑‑‑‑‑‑‑‑‑‑‑‑‑‑‑‑‑‑‑‑‑‑‑‑‑‑‑‑‑‑‑‑‑‑‑‑‑‑‑‑‑‑‑‑‑‑‑‑‑‑‑‑‑

Tissue/ Group/Subgroup/Sex: 1/1/M 2/1/M 3/1/M 4/1/M 1/1/F 2/1/F 3/1/F 4/1/F

Observation Number of Animals:  55  50  50  55  55  50  50  55

‑‑‑‑‑‑‑‑‑‑‑‑‑‑‑‑‑‑‑‑‑‑‑‑‑‑‑‑‑‑‑‑‑‑‑‑‑‑‑‑‑‑‑‑‑‑‑‑‑‑‑‑‑‑‑‑‑‑‑‑‑‑‑‑‑‑‑‑‑‑‑‑‑‑‑‑‑‑‑‑‑‑‑‑‑‑‑‑‑‑‑‑‑‑‑‑‑‑‑‑‑‑‑‑‑‑‑‑

Trachea Number Examined:  55  50  50  55  55  50  50  55

Unremarkable:  55  50  49  55  54  49  50  55

Hemorrhage   0   0   1   0   0   0   0   0

Hyperplasia, epithelium   0   0   0   0   1   0   0   0

Inflammation, acute   0   0   1   0   1   0   0   0

Inflammation, chronic‑active   0   0   0   0   0   1   0   0

Ureter Number Examined:  55  50  50  55  55  50  50  54

Unremarkable:  53  49  49  54  54  49  48  54

Dilatation   0   0   0   0   1   0   0   0

Erosion/ulcer   0   0   0   0   0   1   0   0

Hyperplasia, transitional cell   2   1   0   1   0   1   2   0

Inflammation   2   1   1   1   1   1   2   0

Urinary Bladder Number Examined:  55  50  50  55  55  49  50  54

Unremarkable:  53  48  49  54  54  48  47  54

Hemorrhage   1   0   1   0   0   0   0   0

Hyperplasia, transitional cell   1   1   0   1   0   1   2   0

Inflammation   2   2   1   1   0   1   2   0

M‑Carcinoma, transitional cell   0   0   0   0   1   0   0   0

N‑Carcinoma   0   0   0   0   0   0   1   0

‑‑‑‑‑‑‑‑‑‑‑‑‑‑‑‑‑‑‑‑‑‑‑‑‑‑‑‑‑‑‑‑‑‑‑‑‑‑‑‑‑‑‑‑‑‑‑‑‑‑‑‑‑‑‑‑‑‑‑‑‑‑‑‑‑‑‑‑‑‑‑‑‑‑‑‑‑‑‑‑‑‑‑‑‑‑‑‑‑‑‑‑‑‑‑‑‑‑‑‑‑‑‑‑‑‑‑

Table

Incidence of Microscopic Observations

All Animals

Test Article (dosage) 1M 2M 3M 4M 1F 2F 3F 4F

‑‑‑‑‑‑‑‑‑‑‑‑‑‑‑‑‑‑‑‑‑‑‑‑‑‑‑ ‑‑‑‑‑‑‑‑ ‑‑ ‑‑ ‑‑ ‑‑ ‑‑ ‑‑ ‑‑ ‑‑

Benzonatate (PF‑00345410) mg/kg/day 0 10 30 90 0 5 15 50

‑‑‑‑‑‑‑‑‑‑‑‑‑‑‑‑‑‑‑‑‑‑‑‑‑‑‑‑‑‑‑‑‑‑‑‑‑‑‑‑‑‑‑‑‑‑‑‑‑‑‑‑‑‑‑‑‑‑‑‑‑‑‑‑‑‑‑‑‑‑‑‑‑‑‑‑‑‑‑‑‑‑‑‑‑‑‑‑‑‑‑‑‑‑‑‑‑‑‑‑‑‑‑‑‑‑‑‑

Tissue/ Group/Subgroup/Sex: 1/1/M 2/1/M 3/1/M 4/1/M 1/1/F 2/1/F 3/1/F 4/1/F

Observation Number of Animals:  55  50  50  55  55  50  50  55

‑‑‑‑‑‑‑‑‑‑‑‑‑‑‑‑‑‑‑‑‑‑‑‑‑‑‑‑‑‑‑‑‑‑‑‑‑‑‑‑‑‑‑‑‑‑‑‑‑‑‑‑‑‑‑‑‑‑‑‑‑‑‑‑‑‑‑‑‑‑‑‑‑‑‑‑‑‑‑‑‑‑‑‑‑‑‑‑‑‑‑‑‑‑‑‑‑‑‑‑‑‑‑‑‑‑‑‑

Uterus Number Examined:   0   0   0   0  55  50  50  55

Unremarkable:   0   0   0   0  36  36  35  42

B‑Polyp, endometrial stromal   0   0   0   0   2   5   2   0

C‑Hematopoietic neoplasm, see

body, whole for type 0 0 0 0 1 0 1 1

Cyst   0   0   0   0   2   6   5   4

Dilatation   0   0   0   0   3   1   6   1

Hemorrhage   0   0   0   0   0   1   0   0

Hyperplasia, cystic endometrial   0   0   0   0   5   1   1   2

Hyperplasia, endometrium   0   0   0   0   0   1   1   1

Inflammation, chronic‑active   0   0   0   0   0   2   4   1

Intussusception   0   0   0   0   0   1   0   0

Lumen, debris, cellular   0   0   0   0   0   1   0   0

M‑Carcinoma   0   0   0   0   4   1   0   2

M‑Carcinoma, squamous cell   0   0   0   0   0   0   0   1

M‑Leiomyosarcoma   0   0   0   0   1   0   0   0

M‑Sarcoma, stromal   0   0   0   0   1   0   0   0

N‑Carcinoma   0   0   0   0   1   0   0   0

‑‑‑‑‑‑‑‑‑‑‑‑‑‑‑‑‑‑‑‑‑‑‑‑‑‑‑‑‑‑‑‑‑‑‑‑‑‑‑‑‑‑‑‑‑‑‑‑‑‑‑‑‑‑‑‑‑‑‑‑‑‑‑‑‑‑‑‑‑‑‑‑‑‑‑‑‑‑‑‑‑‑‑‑‑‑‑‑‑‑‑‑‑‑‑‑‑‑‑‑‑‑‑‑‑‑‑

Table

Incidence of Microscopic Observations

All Animals

Test Article (dosage) 1M 2M 3M 4M 1F 2F 3F 4F

‑‑‑‑‑‑‑‑‑‑‑‑‑‑‑‑‑‑‑‑‑‑‑‑‑‑‑ ‑‑‑‑‑‑‑‑ ‑‑ ‑‑ ‑‑ ‑‑ ‑‑ ‑‑ ‑‑ ‑‑

Benzonatate (PF‑00345410) mg/kg/day 0 10 30 90 0 5 15 50

‑‑‑‑‑‑‑‑‑‑‑‑‑‑‑‑‑‑‑‑‑‑‑‑‑‑‑‑‑‑‑‑‑‑‑‑‑‑‑‑‑‑‑‑‑‑‑‑‑‑‑‑‑‑‑‑‑‑‑‑‑‑‑‑‑‑‑‑‑‑‑‑‑‑‑‑‑‑‑‑‑‑‑‑‑‑‑‑‑‑‑‑‑‑‑‑‑‑‑‑‑‑‑‑‑‑‑‑

Tissue/ Group/Subgroup/Sex: 1/1/M 2/1/M 3/1/M 4/1/M 1/1/F 2/1/F 3/1/F 4/1/F

Observation Number of Animals:  55  50  50  55  55  50  50  55

‑‑‑‑‑‑‑‑‑‑‑‑‑‑‑‑‑‑‑‑‑‑‑‑‑‑‑‑‑‑‑‑‑‑‑‑‑‑‑‑‑‑‑‑‑‑‑‑‑‑‑‑‑‑‑‑‑‑‑‑‑‑‑‑‑‑‑‑‑‑‑‑‑‑‑‑‑‑‑‑‑‑‑‑‑‑‑‑‑‑‑‑‑‑‑‑‑‑‑‑‑‑‑‑‑‑‑‑

Vagina Number Examined:   0   0   0   0  55  50  50  55

Unremarkable:   0   0   0   0  33  26  30  31

C‑Hematopoietic neoplasm, see

body, whole for type 0 0 0 0 0 0 1 1

Exudate, lumen   0   0   0   0   4   5   1   4

I‑CarcinomaI‑Carcinoma   0   0   0   0   0   1   0   0

I‑Sarcoma   0   0   0   0   1   1   0   0

Mucification, epithelium   0   0   0   0  17  21  18  21

‑‑‑‑‑‑‑‑‑‑‑‑‑‑‑‑‑‑‑‑‑‑‑‑‑‑‑‑‑‑‑‑‑‑‑‑‑‑‑‑‑‑‑‑‑‑‑‑‑‑‑‑‑‑‑‑‑‑‑‑‑‑‑‑‑‑‑‑‑‑‑‑‑‑‑‑‑‑‑‑‑‑‑‑‑‑‑‑‑‑‑‑‑‑‑‑‑‑‑‑‑‑‑‑‑‑‑

Table 5.7: Summary of Severity for Selected Microscopic Observations - Terminal Euthanasia (Dosing Phase)

Test Article (dosage) 1M 2M 3M 4M 1F 2F 3F 4F

‑‑‑‑‑‑‑‑‑‑‑‑‑‑‑‑‑‑‑‑‑‑‑‑‑‑‑ ‑‑‑‑‑‑‑‑ ‑‑ ‑‑ ‑‑ ‑‑ ‑‑ ‑‑ ‑‑ ‑‑

Benzonatate (PF‑00345410) mg/kg/day 0 10 30 90 0 5 15 50

‑‑‑‑‑‑‑‑‑‑‑‑‑‑‑‑‑‑‑‑‑‑‑‑‑‑‑‑‑‑‑‑‑‑‑‑‑‑‑‑‑‑‑‑‑‑‑‑‑‑‑‑‑‑‑‑‑‑‑‑‑‑‑‑‑‑‑‑‑‑‑‑‑‑‑‑‑‑‑‑‑‑‑‑‑‑‑‑‑‑‑‑‑‑‑‑‑‑‑‑‑‑‑‑‑‑‑‑

Tissue/ Group/Subgroup/Sex: 1/1/M 2/1/M 3/1/M 4/1/M 1/1/F 2/1/F 3/1/F 4/1/F

Observation Number of Animals:  33  24  31  28  25  23  24  30

‑‑‑‑‑‑‑‑‑‑‑‑‑‑‑‑‑‑‑‑‑‑‑‑‑‑‑‑‑‑‑‑‑‑‑‑‑‑‑‑‑‑‑‑‑‑‑‑‑‑‑‑‑‑‑‑‑‑‑‑‑‑‑‑‑‑‑‑‑‑‑‑‑‑‑‑‑‑‑‑‑‑‑‑‑‑‑‑‑‑‑‑‑‑‑‑‑‑‑‑‑‑‑‑‑‑‑‑

Abdominal Cavity Number Examined:   0   0   0   1   0   0   0   0

Unremarkable:   0   0   0   0   0   0   0   0

Necrosis, fat

finding not present ‑   0   0   0   0   0   0   0   0

moderate 3   0   0   0   1   0   0   0   0

Total Incidence:   0   0   0   1   0   0   0   0

Average Severity:   0.0   0.0   0.0   3.0   0.0   0.0   0.0   0.0

Adipose, Other Number Examined:   0   0   0   0   4   0   0   1

Unremarkable:   0   0   0   0   0   0   0   0

Inflammation, chronic‑active

finding not present ‑   0   0   0   0   4   0   0   0

moderate 3   0   0   0   0   0   0   0   1

Total Incidence:   0   0   0   0   0   0   0   1

Average Severity:   0.0   0.0   0.0   0.0   0.0   0.0   0.0   3.0

Necrosis

finding not present ‑   0   0   0   0   1   0   0   0

moderate 3   0   0   0   0   3   0   0   1

Total Incidence:   0   0   0   0   3   0   0   1

Average Severity:   0.0   0.0   0.0   0.0   3.0   0.0   0.0   3.0

‑‑‑‑‑‑‑‑‑‑‑‑‑‑‑‑‑‑‑‑‑‑‑‑‑‑‑‑‑‑‑‑‑‑‑‑‑‑‑‑‑‑‑‑‑‑‑‑‑‑‑‑‑‑‑‑‑‑‑‑‑‑‑‑‑‑‑‑‑‑‑‑‑‑‑‑‑‑‑‑‑‑‑‑‑‑‑‑‑‑‑‑‑‑‑‑‑‑‑‑‑‑‑‑‑‑‑

Table

Summary of Severity for Selected Microscopic Observations

Terminal Euthanasia (Dosing Phase)

Test Article (dosage) 1M 2M 3M 4M 1F 2F 3F 4F

‑‑‑‑‑‑‑‑‑‑‑‑‑‑‑‑‑‑‑‑‑‑‑‑‑‑‑ ‑‑‑‑‑‑‑‑ ‑‑ ‑‑ ‑‑ ‑‑ ‑‑ ‑‑ ‑‑ ‑‑

Benzonatate (PF‑00345410) mg/kg/day 0 10 30 90 0 5 15 50

‑‑‑‑‑‑‑‑‑‑‑‑‑‑‑‑‑‑‑‑‑‑‑‑‑‑‑‑‑‑‑‑‑‑‑‑‑‑‑‑‑‑‑‑‑‑‑‑‑‑‑‑‑‑‑‑‑‑‑‑‑‑‑‑‑‑‑‑‑‑‑‑‑‑‑‑‑‑‑‑‑‑‑‑‑‑‑‑‑‑‑‑‑‑‑‑‑‑‑‑‑‑‑‑‑‑‑‑

Tissue/ Group/Subgroup/Sex: 1/1/M 2/1/M 3/1/M 4/1/M 1/1/F 2/1/F 3/1/F 4/1/F

Observation Number of Animals:  33  24  31  28  25  23  24  30

‑‑‑‑‑‑‑‑‑‑‑‑‑‑‑‑‑‑‑‑‑‑‑‑‑‑‑‑‑‑‑‑‑‑‑‑‑‑‑‑‑‑‑‑‑‑‑‑‑‑‑‑‑‑‑‑‑‑‑‑‑‑‑‑‑‑‑‑‑‑‑‑‑‑‑‑‑‑‑‑‑‑‑‑‑‑‑‑‑‑‑‑‑‑‑‑‑‑‑‑‑‑‑‑‑‑‑‑

Adipose, White,

Kidney Fat Pad Number Examined: 0 0 1 0 0 0 0 0

Unremarkable: 0 0 0 0 0 0 0 0

Hemorrhage

finding not present ‑   0   0   0   0   0   0   0   0

marked 4   0   0   1   0   0   0   0   0

Total Incidence:   0   0   1   0   0   0   0   0

Average Severity:   0.0   0.0   4.0   0.0   0.0   0.0   0.0   0.0

Inflammation, chronic‑active

finding not present ‑   0   0   0   0   0   0   0   0

marked 4   0   0   1   0   0   0   0   0

Total Incidence:   0   0   1   0   0   0   0   0

Average Severity:   0.0   0.0   4.0   0.0   0.0   0.0   0.0   0.0

‑‑‑‑‑‑‑‑‑‑‑‑‑‑‑‑‑‑‑‑‑‑‑‑‑‑‑‑‑‑‑‑‑‑‑‑‑‑‑‑‑‑‑‑‑‑‑‑‑‑‑‑‑‑‑‑‑‑‑‑‑‑‑‑‑‑‑‑‑‑‑‑‑‑‑‑‑‑‑‑‑‑‑‑‑‑‑‑‑‑‑‑‑‑‑‑‑‑‑‑‑‑‑‑‑‑‑

Table

Summary of Severity for Selected Microscopic Observations

Terminal Euthanasia (Dosing Phase)

Test Article (dosage) 1M 2M 3M 4M 1F 2F 3F 4F

‑‑‑‑‑‑‑‑‑‑‑‑‑‑‑‑‑‑‑‑‑‑‑‑‑‑‑ ‑‑‑‑‑‑‑‑ ‑‑ ‑‑ ‑‑ ‑‑ ‑‑ ‑‑ ‑‑ ‑‑

Benzonatate (PF‑00345410) mg/kg/day 0 10 30 90 0 5 15 50

‑‑‑‑‑‑‑‑‑‑‑‑‑‑‑‑‑‑‑‑‑‑‑‑‑‑‑‑‑‑‑‑‑‑‑‑‑‑‑‑‑‑‑‑‑‑‑‑‑‑‑‑‑‑‑‑‑‑‑‑‑‑‑‑‑‑‑‑‑‑‑‑‑‑‑‑‑‑‑‑‑‑‑‑‑‑‑‑‑‑‑‑‑‑‑‑‑‑‑‑‑‑‑‑‑‑‑‑

Tissue/ Group/Subgroup/Sex: 1/1/M 2/1/M 3/1/M 4/1/M 1/1/F 2/1/F 3/1/F 4/1/F

Observation Number of Animals:  33  24  31  28  25  23  24  30

‑‑‑‑‑‑‑‑‑‑‑‑‑‑‑‑‑‑‑‑‑‑‑‑‑‑‑‑‑‑‑‑‑‑‑‑‑‑‑‑‑‑‑‑‑‑‑‑‑‑‑‑‑‑‑‑‑‑‑‑‑‑‑‑‑‑‑‑‑‑‑‑‑‑‑‑‑‑‑‑‑‑‑‑‑‑‑‑‑‑‑‑‑‑‑‑‑‑‑‑‑‑‑‑‑‑‑‑

Adrenal, Cortex Number Examined:  33  24  31  28  25  23  24  30

Unremarkable:   2   1   1   1   0   0   0   0

Atrophy

finding not present ‑  33  24  31  28  24  23  24  29

marked 4   0   0   0   0   1   0   0   1

Total Incidence:   0   0   0   0   1   0   0   1

Average Severity:   0.0   0.0   0.0   0.0   4.0   0.0   0.0   4.0

Degeneration, cystic/hemorrhagic

finding not present ‑   5   2   2   1   1   0   0   1

minimal 1  11  10  10  14   1   3   2   0

slight 2  17   9  18  11   8   3   5   7

moderate 3   0   3   1   2  12  14  15  17

marked 4   0   0   0   0   3   2   2   5

severe 5   0   0   0   0   0   1   0   0

Total Incidence:  28  22  29  27  24  23  24  29

Average Severity:   1.6   1.7   1.7   1.6   2.7   2.8   2.7   2.9

‑‑‑‑‑‑‑‑‑‑‑‑‑‑‑‑‑‑‑‑‑‑‑‑‑‑‑‑‑‑‑‑‑‑‑‑‑‑‑‑‑‑‑‑‑‑‑‑‑‑‑‑‑‑‑‑‑‑‑‑‑‑‑‑‑‑‑‑‑‑‑‑‑‑‑‑‑‑‑‑‑‑‑‑‑‑‑‑‑‑‑‑‑‑‑‑‑‑‑‑‑‑‑‑‑‑‑

Table

Summary of Severity for Selected Microscopic Observations

Terminal Euthanasia (Dosing Phase)

Test Article (dosage) 1M 2M 3M 4M 1F 2F 3F 4F

‑‑‑‑‑‑‑‑‑‑‑‑‑‑‑‑‑‑‑‑‑‑‑‑‑‑‑ ‑‑‑‑‑‑‑‑ ‑‑ ‑‑ ‑‑ ‑‑ ‑‑ ‑‑ ‑‑ ‑‑

Benzonatate (PF‑00345410) mg/kg/day 0 10 30 90 0 5 15 50

‑‑‑‑‑‑‑‑‑‑‑‑‑‑‑‑‑‑‑‑‑‑‑‑‑‑‑‑‑‑‑‑‑‑‑‑‑‑‑‑‑‑‑‑‑‑‑‑‑‑‑‑‑‑‑‑‑‑‑‑‑‑‑‑‑‑‑‑‑‑‑‑‑‑‑‑‑‑‑‑‑‑‑‑‑‑‑‑‑‑‑‑‑‑‑‑‑‑‑‑‑‑‑‑‑‑‑‑

Tissue/ Group/Subgroup/Sex: 1/1/M 2/1/M 3/1/M 4/1/M 1/1/F 2/1/F 3/1/F 4/1/F

Observation Number of Animals:  33  24  31  28  25  23  24  30

‑‑‑‑‑‑‑‑‑‑‑‑‑‑‑‑‑‑‑‑‑‑‑‑‑‑‑‑‑‑‑‑‑‑‑‑‑‑‑‑‑‑‑‑‑‑‑‑‑‑‑‑‑‑‑‑‑‑‑‑‑‑‑‑‑‑‑‑‑‑‑‑‑‑‑‑‑‑‑‑‑‑‑‑‑‑‑‑‑‑‑‑‑‑‑‑‑‑‑‑‑‑‑‑‑‑‑‑

Adrenal, Cortex Number Examined:  33  24  31  28  25  23  24  30

Unremarkable:   2   1   1   1   0   0   0   0

Hyperplasia

finding not present ‑  30  21  30  27  24  22  23  30

minimal 1   0   1   0   0   0   0   0   0

slight 2   2   2   1   1   1   0   0   0

moderate 3   0   0   0   0   0   1   1   0

marked 4   1   0   0   0   0   0   0   0

Total Incidence:   3   3   1   1   1   1   1   0

Average Severity:   2.7   1.7   2.0   2.0   2.0   3.0   3.0   0.0

Hypertrophy

finding not present ‑  28  17  24  26  22  20  19  28

minimal 1   0   0   1   0   0   1   0   0

slight 2   5   5   4   1   3   0   1   2

moderate 3   0   2   2   1   0   1   4   0

marked 4   0   0   0   0   0   1   0   0

Total Incidence:   5   7   7   2   3   3   5   2

Average Severity:   2.0   2.3   2.1   2.5   2.0   2.7   2.8   2.0

Inflammation, chronic‑active

finding not present ‑  33  24  31  28  25  23  23  30

slight 2   0   0   0   0   0   0   1   0

Total Incidence:   0   0   0   0   0   0   1   0

Average Severity:   0.0   0.0   0.0   0.0   0.0   0.0   2.0   0.0

‑‑‑‑‑‑‑‑‑‑‑‑‑‑‑‑‑‑‑‑‑‑‑‑‑‑‑‑‑‑‑‑‑‑‑‑‑‑‑‑‑‑‑‑‑‑‑‑‑‑‑‑‑‑‑‑‑‑‑‑‑‑‑‑‑‑‑‑‑‑‑‑‑‑‑‑‑‑‑‑‑‑‑‑‑‑‑‑‑‑‑‑‑‑‑‑‑‑‑‑‑‑‑‑‑‑‑

Table

Summary of Severity for Selected Microscopic Observations

Terminal Euthanasia (Dosing Phase)

Test Article (dosage) 1M 2M 3M 4M 1F 2F 3F 4F

‑‑‑‑‑‑‑‑‑‑‑‑‑‑‑‑‑‑‑‑‑‑‑‑‑‑‑ ‑‑‑‑‑‑‑‑ ‑‑ ‑‑ ‑‑ ‑‑ ‑‑ ‑‑ ‑‑ ‑‑

Benzonatate (PF‑00345410) mg/kg/day 0 10 30 90 0 5 15 50

‑‑‑‑‑‑‑‑‑‑‑‑‑‑‑‑‑‑‑‑‑‑‑‑‑‑‑‑‑‑‑‑‑‑‑‑‑‑‑‑‑‑‑‑‑‑‑‑‑‑‑‑‑‑‑‑‑‑‑‑‑‑‑‑‑‑‑‑‑‑‑‑‑‑‑‑‑‑‑‑‑‑‑‑‑‑‑‑‑‑‑‑‑‑‑‑‑‑‑‑‑‑‑‑‑‑‑‑

Tissue/ Group/Subgroup/Sex: 1/1/M 2/1/M 3/1/M 4/1/M 1/1/F 2/1/F 3/1/F 4/1/F

Observation Number of Animals:  33  24  31  28  25  23  24  30

‑‑‑‑‑‑‑‑‑‑‑‑‑‑‑‑‑‑‑‑‑‑‑‑‑‑‑‑‑‑‑‑‑‑‑‑‑‑‑‑‑‑‑‑‑‑‑‑‑‑‑‑‑‑‑‑‑‑‑‑‑‑‑‑‑‑‑‑‑‑‑‑‑‑‑‑‑‑‑‑‑‑‑‑‑‑‑‑‑‑‑‑‑‑‑‑‑‑‑‑‑‑‑‑‑‑‑‑

Adrenal, Medulla Number Examined:  33  24  31  28  25  23  24  30

Unremarkable:  32  22  30  27  23  22  23  29

Hyperplasia

finding not present ‑  33  23  31  27  25  23  23  30

slight 2   0   0   0   0   0   0   1   0

moderate 3   0   1   0   1   0   0   0   0

Total Incidence:   0   1   0   1   0   0   1   0

Average Severity:   0.0   3.0   0.0   3.0   0.0   0.0   2.0   0.0

Infiltrate, mononuclear cell

finding not present ‑  33  24  31  28  25  22  24  29

minimal 1   0   0   0   0   0   1   0   1

Total Incidence:   0   0   0   0   0   1   0   1

Average Severity:   0.0   0.0   0.0   0.0   0.0   1.0   0.0   1.0

Aorta Number Examined:  33  24  31  28  25  23  24  30

Unremarkable:  33  24  31  28  25  23  24  30

Body, Whole/Cavity Number Examined:  33  24  31  28  25  23  24  30

Unremarkable:  26  17  25  23  22  23  20  27

‑‑‑‑‑‑‑‑‑‑‑‑‑‑‑‑‑‑‑‑‑‑‑‑‑‑‑‑‑‑‑‑‑‑‑‑‑‑‑‑‑‑‑‑‑‑‑‑‑‑‑‑‑‑‑‑‑‑‑‑‑‑‑‑‑‑‑‑‑‑‑‑‑‑‑‑‑‑‑‑‑‑‑‑‑‑‑‑‑‑‑‑‑‑‑‑‑‑‑‑‑‑‑‑‑‑‑

Table

Summary of Severity for Selected Microscopic Observations

Terminal Euthanasia (Dosing Phase)

Test Article (dosage) 1M 2M 3M 4M 1F 2F 3F 4F

‑‑‑‑‑‑‑‑‑‑‑‑‑‑‑‑‑‑‑‑‑‑‑‑‑‑‑ ‑‑‑‑‑‑‑‑ ‑‑ ‑‑ ‑‑ ‑‑ ‑‑ ‑‑ ‑‑ ‑‑

Benzonatate (PF‑00345410) mg/kg/day 0 10 30 90 0 5 15 50

‑‑‑‑‑‑‑‑‑‑‑‑‑‑‑‑‑‑‑‑‑‑‑‑‑‑‑‑‑‑‑‑‑‑‑‑‑‑‑‑‑‑‑‑‑‑‑‑‑‑‑‑‑‑‑‑‑‑‑‑‑‑‑‑‑‑‑‑‑‑‑‑‑‑‑‑‑‑‑‑‑‑‑‑‑‑‑‑‑‑‑‑‑‑‑‑‑‑‑‑‑‑‑‑‑‑‑‑

Tissue/ Group/Subgroup/Sex: 1/1/M 2/1/M 3/1/M 4/1/M 1/1/F 2/1/F 3/1/F 4/1/F

Observation Number of Animals:  33  24  31  28  25  23  24  30

‑‑‑‑‑‑‑‑‑‑‑‑‑‑‑‑‑‑‑‑‑‑‑‑‑‑‑‑‑‑‑‑‑‑‑‑‑‑‑‑‑‑‑‑‑‑‑‑‑‑‑‑‑‑‑‑‑‑‑‑‑‑‑‑‑‑‑‑‑‑‑‑‑‑‑‑‑‑‑‑‑‑‑‑‑‑‑‑‑‑‑‑‑‑‑‑‑‑‑‑‑‑‑‑‑‑‑‑

Brain Number Examined:  33  24  31  28  25  23  24  30

Unremarkable:  27  22  30  24  16  11  14  17

Compression, ventral

finding not present ‑  27  22  31  25  16  11  14  17

minimal 1   3   1   0   1   6   5   7   5

slight 2   3   1   0   2   1   7   3   8

moderate 3   0   0   0   0   2   0   0   0

Total Incidence:   6   2   0   3   9  12  10  13

Average Severity:   1.5   1.5   0.0   1.7   1.6   1.6   1.3   1.6

‑‑‑‑‑‑‑‑‑‑‑‑‑‑‑‑‑‑‑‑‑‑‑‑‑‑‑‑‑‑‑‑‑‑‑‑‑‑‑‑‑‑‑‑‑‑‑‑‑‑‑‑‑‑‑‑‑‑‑‑‑‑‑‑‑‑‑‑‑‑‑‑‑‑‑‑‑‑‑‑‑‑‑‑‑‑‑‑‑‑‑‑‑‑‑‑‑‑‑‑‑‑‑‑‑‑‑

Table

Summary of Severity for Selected Microscopic Observations

Terminal Euthanasia (Dosing Phase)

Test Article (dosage) 1M 2M 3M 4M 1F 2F 3F 4F

‑‑‑‑‑‑‑‑‑‑‑‑‑‑‑‑‑‑‑‑‑‑‑‑‑‑‑ ‑‑‑‑‑‑‑‑ ‑‑ ‑‑ ‑‑ ‑‑ ‑‑ ‑‑ ‑‑ ‑‑

Benzonatate (PF‑00345410) mg/kg/day 0 10 30 90 0 5 15 50

‑‑‑‑‑‑‑‑‑‑‑‑‑‑‑‑‑‑‑‑‑‑‑‑‑‑‑‑‑‑‑‑‑‑‑‑‑‑‑‑‑‑‑‑‑‑‑‑‑‑‑‑‑‑‑‑‑‑‑‑‑‑‑‑‑‑‑‑‑‑‑‑‑‑‑‑‑‑‑‑‑‑‑‑‑‑‑‑‑‑‑‑‑‑‑‑‑‑‑‑‑‑‑‑‑‑‑‑

Tissue/ Group/Subgroup/Sex: 1/1/M 2/1/M 3/1/M 4/1/M 1/1/F 2/1/F 3/1/F 4/1/F

Observation Number of Animals:  33  24  31  28  25  23  24  30

‑‑‑‑‑‑‑‑‑‑‑‑‑‑‑‑‑‑‑‑‑‑‑‑‑‑‑‑‑‑‑‑‑‑‑‑‑‑‑‑‑‑‑‑‑‑‑‑‑‑‑‑‑‑‑‑‑‑‑‑‑‑‑‑‑‑‑‑‑‑‑‑‑‑‑‑‑‑‑‑‑‑‑‑‑‑‑‑‑‑‑‑‑‑‑‑‑‑‑‑‑‑‑‑‑‑‑‑

Cecum Number Examined:  33  24  31  28  25  23  24  30

Unremarkable:  32  24  31  27  25  23  22  30

Ectasia, crypt/gland

finding not present ‑  32  24  31  28  25  23  24  30

slight 2   1   0   0   0   0   0   0   0

Total Incidence:   1   0   0   0   0   0   0   0

Average Severity:   2.0   0.0   0.0   0.0   0.0   0.0   0.0   0.0

Hemorrhage

finding not present ‑  32  24  31  28  25  23  24  30

slight 2   1   0   0   0   0   0   0   0

Total Incidence:   1   0   0   0   0   0   0   0

Average Severity:   2.0   0.0   0.0   0.0   0.0   0.0   0.0   0.0

Inflammation

finding not present ‑  32  24  31  28  25  23  24  30

slight 2   1   0   0   0   0   0   0   0

Total Incidence:   1   0   0   0   0   0   0   0

Average Severity:   2.0   0.0   0.0   0.0   0.0   0.0   0.0   0.0

‑‑‑‑‑‑‑‑‑‑‑‑‑‑‑‑‑‑‑‑‑‑‑‑‑‑‑‑‑‑‑‑‑‑‑‑‑‑‑‑‑‑‑‑‑‑‑‑‑‑‑‑‑‑‑‑‑‑‑‑‑‑‑‑‑‑‑‑‑‑‑‑‑‑‑‑‑‑‑‑‑‑‑‑‑‑‑‑‑‑‑‑‑‑‑‑‑‑‑‑‑‑‑‑‑‑‑

Table

Summary of Severity for Selected Microscopic Observations

Terminal Euthanasia (Dosing Phase)

Test Article (dosage) 1M 2M 3M 4M 1F 2F 3F 4F

‑‑‑‑‑‑‑‑‑‑‑‑‑‑‑‑‑‑‑‑‑‑‑‑‑‑‑ ‑‑‑‑‑‑‑‑ ‑‑ ‑‑ ‑‑ ‑‑ ‑‑ ‑‑ ‑‑ ‑‑

Benzonatate (PF‑00345410) mg/kg/day 0 10 30 90 0 5 15 50

‑‑‑‑‑‑‑‑‑‑‑‑‑‑‑‑‑‑‑‑‑‑‑‑‑‑‑‑‑‑‑‑‑‑‑‑‑‑‑‑‑‑‑‑‑‑‑‑‑‑‑‑‑‑‑‑‑‑‑‑‑‑‑‑‑‑‑‑‑‑‑‑‑‑‑‑‑‑‑‑‑‑‑‑‑‑‑‑‑‑‑‑‑‑‑‑‑‑‑‑‑‑‑‑‑‑‑‑

Tissue/ Group/Subgroup/Sex: 1/1/M 2/1/M 3/1/M 4/1/M 1/1/F 2/1/F 3/1/F 4/1/F

Observation Number of Animals:  33  24  31  28  25  23  24  30

‑‑‑‑‑‑‑‑‑‑‑‑‑‑‑‑‑‑‑‑‑‑‑‑‑‑‑‑‑‑‑‑‑‑‑‑‑‑‑‑‑‑‑‑‑‑‑‑‑‑‑‑‑‑‑‑‑‑‑‑‑‑‑‑‑‑‑‑‑‑‑‑‑‑‑‑‑‑‑‑‑‑‑‑‑‑‑‑‑‑‑‑‑‑‑‑‑‑‑‑‑‑‑‑‑‑‑‑

Cecum Number Examined:  33  24  31  28  25  23  24  30

Unremarkable:  32  24  31  27  25  23  22  30

Inflammation, chronic,

vascular/perivascular

finding not present ‑  33  24  31  28  25  23  23  30

moderate 3   0   0   0   0   0   0   1   0

Total Incidence:   0   0   0   0   0   0   1   0

Average Severity:   0.0   0.0   0.0   0.0   0.0   0.0   3.0   0.0

Parasite, nematode

finding not present ‑  33  24  31  28  25  23  23  30

Present   0   0   0   0   0   0   1   0

‑‑‑‑‑‑‑‑‑‑‑‑‑‑‑‑‑‑‑‑‑‑‑‑‑‑‑‑‑‑‑‑‑‑‑‑‑‑‑‑‑‑‑‑‑‑‑‑‑‑‑‑‑‑‑‑‑‑‑‑‑‑‑‑‑‑‑‑‑‑‑‑‑‑‑‑‑‑‑‑‑‑‑‑‑‑‑‑‑‑‑‑‑‑‑‑‑‑‑‑‑‑‑‑‑‑‑

Table

Summary of Severity for Selected Microscopic Observations

Terminal Euthanasia (Dosing Phase)

Test Article (dosage) 1M 2M 3M 4M 1F 2F 3F 4F

‑‑‑‑‑‑‑‑‑‑‑‑‑‑‑‑‑‑‑‑‑‑‑‑‑‑‑ ‑‑‑‑‑‑‑‑ ‑‑ ‑‑ ‑‑ ‑‑ ‑‑ ‑‑ ‑‑ ‑‑

Benzonatate (PF‑00345410) mg/kg/day 0 10 30 90 0 5 15 50

‑‑‑‑‑‑‑‑‑‑‑‑‑‑‑‑‑‑‑‑‑‑‑‑‑‑‑‑‑‑‑‑‑‑‑‑‑‑‑‑‑‑‑‑‑‑‑‑‑‑‑‑‑‑‑‑‑‑‑‑‑‑‑‑‑‑‑‑‑‑‑‑‑‑‑‑‑‑‑‑‑‑‑‑‑‑‑‑‑‑‑‑‑‑‑‑‑‑‑‑‑‑‑‑‑‑‑‑

Tissue/ Group/Subgroup/Sex: 1/1/M 2/1/M 3/1/M 4/1/M 1/1/F 2/1/F 3/1/F 4/1/F

Observation Number of Animals:  33  24  31  28  25  23  24  30

‑‑‑‑‑‑‑‑‑‑‑‑‑‑‑‑‑‑‑‑‑‑‑‑‑‑‑‑‑‑‑‑‑‑‑‑‑‑‑‑‑‑‑‑‑‑‑‑‑‑‑‑‑‑‑‑‑‑‑‑‑‑‑‑‑‑‑‑‑‑‑‑‑‑‑‑‑‑‑‑‑‑‑‑‑‑‑‑‑‑‑‑‑‑‑‑‑‑‑‑‑‑‑‑‑‑‑‑

Cervix Number Examined:   0   0   0   0  25  23  24  30

Unremarkable:   0   0   0   0  20  18  19  25

Hyperplasia, epithelium

finding not present ‑   0   0   0   0  22  23  19  28

minimal 1   0   0   0   0   0   0   3   0

slight 2   0   0   0   0   3   0   2   1

moderate 3   0   0   0   0   0   0   0   1

Total Incidence:   0   0   0   0   3   0   5   2

Average Severity:   0.0   0.0   0.0   0.0   2.0   0.0   1.4   2.5

Hypertrophy, stroma

finding not present ‑   0   0   0   0  25  22  24  29

slight 2   0   0   0   0   0   1   0   1

Total Incidence:   0   0   0   0   0   1   0   1

Average Severity:   0.0   0.0   0.0   0.0   0.0   2.0   0.0   2.0

Inflammation, chronic‑active

finding not present ‑   0   0   0   0  25  22  24  29

slight 2   0   0   0   0   0   1   0   1

Total Incidence:   0   0   0   0   0   1   0   1

Average Severity:   0.0   0.0   0.0   0.0   0.0   2.0   0.0   2.0

‑‑‑‑‑‑‑‑‑‑‑‑‑‑‑‑‑‑‑‑‑‑‑‑‑‑‑‑‑‑‑‑‑‑‑‑‑‑‑‑‑‑‑‑‑‑‑‑‑‑‑‑‑‑‑‑‑‑‑‑‑‑‑‑‑‑‑‑‑‑‑‑‑‑‑‑‑‑‑‑‑‑‑‑‑‑‑‑‑‑‑‑‑‑‑‑‑‑‑‑‑‑‑‑‑‑‑

Table

Summary of Severity for Selected Microscopic Observations

Terminal Euthanasia (Dosing Phase)

Test Article (dosage) 1M 2M 3M 4M 1F 2F 3F 4F

‑‑‑‑‑‑‑‑‑‑‑‑‑‑‑‑‑‑‑‑‑‑‑‑‑‑‑ ‑‑‑‑‑‑‑‑ ‑‑ ‑‑ ‑‑ ‑‑ ‑‑ ‑‑ ‑‑ ‑‑

Benzonatate (PF‑00345410) mg/kg/day 0 10 30 90 0 5 15 50

‑‑‑‑‑‑‑‑‑‑‑‑‑‑‑‑‑‑‑‑‑‑‑‑‑‑‑‑‑‑‑‑‑‑‑‑‑‑‑‑‑‑‑‑‑‑‑‑‑‑‑‑‑‑‑‑‑‑‑‑‑‑‑‑‑‑‑‑‑‑‑‑‑‑‑‑‑‑‑‑‑‑‑‑‑‑‑‑‑‑‑‑‑‑‑‑‑‑‑‑‑‑‑‑‑‑‑‑

Tissue/ Group/Subgroup/Sex: 1/1/M 2/1/M 3/1/M 4/1/M 1/1/F 2/1/F 3/1/F 4/1/F

Observation Number of Animals:  33  24  31  28  25  23  24  30

‑‑‑‑‑‑‑‑‑‑‑‑‑‑‑‑‑‑‑‑‑‑‑‑‑‑‑‑‑‑‑‑‑‑‑‑‑‑‑‑‑‑‑‑‑‑‑‑‑‑‑‑‑‑‑‑‑‑‑‑‑‑‑‑‑‑‑‑‑‑‑‑‑‑‑‑‑‑‑‑‑‑‑‑‑‑‑‑‑‑‑‑‑‑‑‑‑‑‑‑‑‑‑‑‑‑‑‑

Cervix Number Examined:   0   0   0   0  25  23  24  30

Unremarkable:   0   0   0   0  20  18  19  25

Lumen, exudate/debris

finding not present ‑   0   0   0   0  24  20  24  29

minimal 1   0   0   0   0   1   1   0   1

slight 2   0   0   0   0   0   1   0   0

marked 4   0   0   0   0   0   1   0   0

Total Incidence:   0   0   0   0   1   3   0   1

Average Severity:   0.0   0.0   0.0   0.0   1.0   2.3   0.0   1.0

Clitoral Gland Number Examined:   0   0   0   0   1   0   0   0

Unremarkable:   0   0   0   0   0   0   0   0

Inflammation/cyst

finding not present ‑   0   0   0   0   0   0   0   0

moderate 3   0   0   0   0   1   0   0   0

Total Incidence:   0   0   0   0   1   0   0   0

Average Severity:   0.0   0.0   0.0   0.0   3.0   0.0   0.0   0.0

Colon Number Examined:  33  24  31  28  25  23  24  30

Unremarkable:  32  23  29  28  25  22  24  30

Parasite, nematode

finding not present ‑  32  23  29  28  25  22  24  30

Present   1   1   2   0   0   1   0   0

‑‑‑‑‑‑‑‑‑‑‑‑‑‑‑‑‑‑‑‑‑‑‑‑‑‑‑‑‑‑‑‑‑‑‑‑‑‑‑‑‑‑‑‑‑‑‑‑‑‑‑‑‑‑‑‑‑‑‑‑‑‑‑‑‑‑‑‑‑‑‑‑‑‑‑‑‑‑‑‑‑‑‑‑‑‑‑‑‑‑‑‑‑‑‑‑‑‑‑‑‑‑‑‑‑‑‑

Table

Summary of Severity for Selected Microscopic Observations

Terminal Euthanasia (Dosing Phase)

Test Article (dosage) 1M 2M 3M 4M 1F 2F 3F 4F

‑‑‑‑‑‑‑‑‑‑‑‑‑‑‑‑‑‑‑‑‑‑‑‑‑‑‑ ‑‑‑‑‑‑‑‑ ‑‑ ‑‑ ‑‑ ‑‑ ‑‑ ‑‑ ‑‑ ‑‑

Benzonatate (PF‑00345410) mg/kg/day 0 10 30 90 0 5 15 50

‑‑‑‑‑‑‑‑‑‑‑‑‑‑‑‑‑‑‑‑‑‑‑‑‑‑‑‑‑‑‑‑‑‑‑‑‑‑‑‑‑‑‑‑‑‑‑‑‑‑‑‑‑‑‑‑‑‑‑‑‑‑‑‑‑‑‑‑‑‑‑‑‑‑‑‑‑‑‑‑‑‑‑‑‑‑‑‑‑‑‑‑‑‑‑‑‑‑‑‑‑‑‑‑‑‑‑‑

Tissue/ Group/Subgroup/Sex: 1/1/M 2/1/M 3/1/M 4/1/M 1/1/F 2/1/F 3/1/F 4/1/F

Observation Number of Animals:  33  24  31  28  25  23  24  30

‑‑‑‑‑‑‑‑‑‑‑‑‑‑‑‑‑‑‑‑‑‑‑‑‑‑‑‑‑‑‑‑‑‑‑‑‑‑‑‑‑‑‑‑‑‑‑‑‑‑‑‑‑‑‑‑‑‑‑‑‑‑‑‑‑‑‑‑‑‑‑‑‑‑‑‑‑‑‑‑‑‑‑‑‑‑‑‑‑‑‑‑‑‑‑‑‑‑‑‑‑‑‑‑‑‑‑‑

Death Comment Number Examined:  33  24  31  28  25  23  24  30

Unremarkable:   0   0   0   0   0   0   0   0

Scheduled sacrifice

finding not present ‑   0   0   0   0   0   0   0   0

Present  33  24  31  28  25  23  24  30

Duodenum Number Examined:  33  24  31  28  25  23  24  30

Unremarkable:  33  24  31  28  24  23  24  30

‑‑‑‑‑‑‑‑‑‑‑‑‑‑‑‑‑‑‑‑‑‑‑‑‑‑‑‑‑‑‑‑‑‑‑‑‑‑‑‑‑‑‑‑‑‑‑‑‑‑‑‑‑‑‑‑‑‑‑‑‑‑‑‑‑‑‑‑‑‑‑‑‑‑‑‑‑‑‑‑‑‑‑‑‑‑‑‑‑‑‑‑‑‑‑‑‑‑‑‑‑‑‑‑‑‑‑

Table

Summary of Severity for Selected Microscopic Observations

Terminal Euthanasia (Dosing Phase)

Test Article (dosage) 1M 2M 3M 4M 1F 2F 3F 4F

‑‑‑‑‑‑‑‑‑‑‑‑‑‑‑‑‑‑‑‑‑‑‑‑‑‑‑ ‑‑‑‑‑‑‑‑ ‑‑ ‑‑ ‑‑ ‑‑ ‑‑ ‑‑ ‑‑ ‑‑

Benzonatate (PF‑00345410) mg/kg/day 0 10 30 90 0 5 15 50

‑‑‑‑‑‑‑‑‑‑‑‑‑‑‑‑‑‑‑‑‑‑‑‑‑‑‑‑‑‑‑‑‑‑‑‑‑‑‑‑‑‑‑‑‑‑‑‑‑‑‑‑‑‑‑‑‑‑‑‑‑‑‑‑‑‑‑‑‑‑‑‑‑‑‑‑‑‑‑‑‑‑‑‑‑‑‑‑‑‑‑‑‑‑‑‑‑‑‑‑‑‑‑‑‑‑‑‑

Tissue/ Group/Subgroup/Sex: 1/1/M 2/1/M 3/1/M 4/1/M 1/1/F 2/1/F 3/1/F 4/1/F

Observation Number of Animals:  33  24  31  28  25  23  24  30

‑‑‑‑‑‑‑‑‑‑‑‑‑‑‑‑‑‑‑‑‑‑‑‑‑‑‑‑‑‑‑‑‑‑‑‑‑‑‑‑‑‑‑‑‑‑‑‑‑‑‑‑‑‑‑‑‑‑‑‑‑‑‑‑‑‑‑‑‑‑‑‑‑‑‑‑‑‑‑‑‑‑‑‑‑‑‑‑‑‑‑‑‑‑‑‑‑‑‑‑‑‑‑‑‑‑‑‑

Epididymis Number Examined:  33  24  31  28   0   0   0   0

Unremarkable:  27  22  26  25   0   0   0   0

Granuloma, sperm

finding not present ‑  32  24  30  28   0   0   0   0

moderate 3   1   0   1   0   0   0   0   0

Total Incidence:   1   0   1   0   0   0   0   0

Average Severity:   3.0   0.0   3.0   0.0   0.0   0.0   0.0   0.0

Hypospermia

finding not present ‑  29  23  29  26   0   0   0   0

moderate 3   3   1   2   1   0   0   0   0

marked 4   1   0   0   1   0   0   0   0

Total Incidence:   4   1   2   2   0   0   0   0

Average Severity:   3.3   3.0   3.0   3.5   0.0   0.0   0.0   0.0

Infiltrate, mononuclear cell

finding not present ‑  32  24  29  28   0   0   0   0

minimal 1   1   0   2   0   0   0   0   0

Total Incidence:   1   0   2   0   0   0   0   0

Average Severity:   1.0   0.0   1.0   0.0   0.0   0.0   0.0   0.0

‑‑‑‑‑‑‑‑‑‑‑‑‑‑‑‑‑‑‑‑‑‑‑‑‑‑‑‑‑‑‑‑‑‑‑‑‑‑‑‑‑‑‑‑‑‑‑‑‑‑‑‑‑‑‑‑‑‑‑‑‑‑‑‑‑‑‑‑‑‑‑‑‑‑‑‑‑‑‑‑‑‑‑‑‑‑‑‑‑‑‑‑‑‑‑‑‑‑‑‑‑‑‑‑‑‑‑

Table

Summary of Severity for Selected Microscopic Observations

Terminal Euthanasia (Dosing Phase)

Test Article (dosage) 1M 2M 3M 4M 1F 2F 3F 4F

‑‑‑‑‑‑‑‑‑‑‑‑‑‑‑‑‑‑‑‑‑‑‑‑‑‑‑ ‑‑‑‑‑‑‑‑ ‑‑ ‑‑ ‑‑ ‑‑ ‑‑ ‑‑ ‑‑ ‑‑

Benzonatate (PF‑00345410) mg/kg/day 0 10 30 90 0 5 15 50

‑‑‑‑‑‑‑‑‑‑‑‑‑‑‑‑‑‑‑‑‑‑‑‑‑‑‑‑‑‑‑‑‑‑‑‑‑‑‑‑‑‑‑‑‑‑‑‑‑‑‑‑‑‑‑‑‑‑‑‑‑‑‑‑‑‑‑‑‑‑‑‑‑‑‑‑‑‑‑‑‑‑‑‑‑‑‑‑‑‑‑‑‑‑‑‑‑‑‑‑‑‑‑‑‑‑‑‑

Tissue/ Group/Subgroup/Sex: 1/1/M 2/1/M 3/1/M 4/1/M 1/1/F 2/1/F 3/1/F 4/1/F

Observation Number of Animals:  33  24  31  28  25  23  24  30

‑‑‑‑‑‑‑‑‑‑‑‑‑‑‑‑‑‑‑‑‑‑‑‑‑‑‑‑‑‑‑‑‑‑‑‑‑‑‑‑‑‑‑‑‑‑‑‑‑‑‑‑‑‑‑‑‑‑‑‑‑‑‑‑‑‑‑‑‑‑‑‑‑‑‑‑‑‑‑‑‑‑‑‑‑‑‑‑‑‑‑‑‑‑‑‑‑‑‑‑‑‑‑‑‑‑‑‑

Esophagus Number Examined:  33  24  31  28  25  23  24  30

Unremarkable:  31  24  30  27  24  23  24  30

Degeneration/regeneration,

muscularis

finding not present ‑  31  24  30  27  24  23  24  30

minimal 1   2   0   1   1   1   0   0   0

Total Incidence:   2   0   1   1   1   0   0   0

Average Severity:   1.0   0.0   1.0   1.0   1.0   0.0   0.0   0.0

‑‑‑‑‑‑‑‑‑‑‑‑‑‑‑‑‑‑‑‑‑‑‑‑‑‑‑‑‑‑‑‑‑‑‑‑‑‑‑‑‑‑‑‑‑‑‑‑‑‑‑‑‑‑‑‑‑‑‑‑‑‑‑‑‑‑‑‑‑‑‑‑‑‑‑‑‑‑‑‑‑‑‑‑‑‑‑‑‑‑‑‑‑‑‑‑‑‑‑‑‑‑‑‑‑‑‑

Table

Summary of Severity for Selected Microscopic Observations

Terminal Euthanasia (Dosing Phase)

Test Article (dosage) 1M 2M 3M 4M 1F 2F 3F 4F

‑‑‑‑‑‑‑‑‑‑‑‑‑‑‑‑‑‑‑‑‑‑‑‑‑‑‑ ‑‑‑‑‑‑‑‑ ‑‑ ‑‑ ‑‑ ‑‑ ‑‑ ‑‑ ‑‑ ‑‑

Benzonatate (PF‑00345410) mg/kg/day 0 10 30 90 0 5 15 50

‑‑‑‑‑‑‑‑‑‑‑‑‑‑‑‑‑‑‑‑‑‑‑‑‑‑‑‑‑‑‑‑‑‑‑‑‑‑‑‑‑‑‑‑‑‑‑‑‑‑‑‑‑‑‑‑‑‑‑‑‑‑‑‑‑‑‑‑‑‑‑‑‑‑‑‑‑‑‑‑‑‑‑‑‑‑‑‑‑‑‑‑‑‑‑‑‑‑‑‑‑‑‑‑‑‑‑‑

Tissue/ Group/Subgroup/Sex: 1/1/M 2/1/M 3/1/M 4/1/M 1/1/F 2/1/F 3/1/F 4/1/F

Observation Number of Animals:  33  24  31  28  25  23  24  30

‑‑‑‑‑‑‑‑‑‑‑‑‑‑‑‑‑‑‑‑‑‑‑‑‑‑‑‑‑‑‑‑‑‑‑‑‑‑‑‑‑‑‑‑‑‑‑‑‑‑‑‑‑‑‑‑‑‑‑‑‑‑‑‑‑‑‑‑‑‑‑‑‑‑‑‑‑‑‑‑‑‑‑‑‑‑‑‑‑‑‑‑‑‑‑‑‑‑‑‑‑‑‑‑‑‑‑‑

Eye Number Examined:  32  24  31  28  25  23  24  30

Unremarkable:  24  20  21  19  19  19  20  20

Atrophy, retina

finding not present ‑  25  20  21  19  19  19  20  20

minimal 1   1   0   1   0   1   0   0   1

slight 2   2   2   3   4   2   2   2   6

moderate 3   4   2   6   5   3   2   2   3

Total Incidence:   7   4  10   9   6   4   4  10

Average Severity:   2.4   2.5   2.5   2.6   2.3   2.5   2.5   2.2

Cataract

finding not present ‑  32  24  30  27  25  23  24  30

slight 2   0   0   1   0   0   0   0   0

moderate 3   0   0   0   1   0   0   0   0

Total Incidence:   0   0   1   1   0   0   0   0

Average Severity:   0.0   0.0   2.0   3.0   0.0   0.0   0.0   0.0

Inflammation, chronic‑active

finding not present ‑  32  24  31  27  25  23  24  30

moderate 3   0   0   0   1   0   0   0   0

Total Incidence:   0   0   0   1   0   0   0   0

Average Severity:   0.0   0.0   0.0   3.0   0.0   0.0   0.0   0.0

‑‑‑‑‑‑‑‑‑‑‑‑‑‑‑‑‑‑‑‑‑‑‑‑‑‑‑‑‑‑‑‑‑‑‑‑‑‑‑‑‑‑‑‑‑‑‑‑‑‑‑‑‑‑‑‑‑‑‑‑‑‑‑‑‑‑‑‑‑‑‑‑‑‑‑‑‑‑‑‑‑‑‑‑‑‑‑‑‑‑‑‑‑‑‑‑‑‑‑‑‑‑‑‑‑‑‑

Table

Summary of Severity for Selected Microscopic Observations

Terminal Euthanasia (Dosing Phase)

Test Article (dosage) 1M 2M 3M 4M 1F 2F 3F 4F

‑‑‑‑‑‑‑‑‑‑‑‑‑‑‑‑‑‑‑‑‑‑‑‑‑‑‑ ‑‑‑‑‑‑‑‑ ‑‑ ‑‑ ‑‑ ‑‑ ‑‑ ‑‑ ‑‑ ‑‑

Benzonatate (PF‑00345410) mg/kg/day 0 10 30 90 0 5 15 50

‑‑‑‑‑‑‑‑‑‑‑‑‑‑‑‑‑‑‑‑‑‑‑‑‑‑‑‑‑‑‑‑‑‑‑‑‑‑‑‑‑‑‑‑‑‑‑‑‑‑‑‑‑‑‑‑‑‑‑‑‑‑‑‑‑‑‑‑‑‑‑‑‑‑‑‑‑‑‑‑‑‑‑‑‑‑‑‑‑‑‑‑‑‑‑‑‑‑‑‑‑‑‑‑‑‑‑‑

Tissue/ Group/Subgroup/Sex: 1/1/M 2/1/M 3/1/M 4/1/M 1/1/F 2/1/F 3/1/F 4/1/F

Observation Number of Animals:  33  24  31  28  25  23  24  30

‑‑‑‑‑‑‑‑‑‑‑‑‑‑‑‑‑‑‑‑‑‑‑‑‑‑‑‑‑‑‑‑‑‑‑‑‑‑‑‑‑‑‑‑‑‑‑‑‑‑‑‑‑‑‑‑‑‑‑‑‑‑‑‑‑‑‑‑‑‑‑‑‑‑‑‑‑‑‑‑‑‑‑‑‑‑‑‑‑‑‑‑‑‑‑‑‑‑‑‑‑‑‑‑‑‑‑‑

Eye Number Examined:  32  24  31  28  25  23  24  30

Unremarkable:  24  20  21  19  19  19  20  20

Rosette, retina

finding not present ‑  31  24  31  28  25  23  24  30

minimal 1   1   0   0   0   0   0   0   0

Total Incidence:   1   0   0   0   0   0   0   0

Average Severity:   1.0   0.0   0.0   0.0   0.0   0.0   0.0   0.0

‑‑‑‑‑‑‑‑‑‑‑‑‑‑‑‑‑‑‑‑‑‑‑‑‑‑‑‑‑‑‑‑‑‑‑‑‑‑‑‑‑‑‑‑‑‑‑‑‑‑‑‑‑‑‑‑‑‑‑‑‑‑‑‑‑‑‑‑‑‑‑‑‑‑‑‑‑‑‑‑‑‑‑‑‑‑‑‑‑‑‑‑‑‑‑‑‑‑‑‑‑‑‑‑‑‑‑

Table

Summary of Severity for Selected Microscopic Observations

Terminal Euthanasia (Dosing Phase)

Test Article (dosage) 1M 2M 3M 4M 1F 2F 3F 4F

‑‑‑‑‑‑‑‑‑‑‑‑‑‑‑‑‑‑‑‑‑‑‑‑‑‑‑ ‑‑‑‑‑‑‑‑ ‑‑ ‑‑ ‑‑ ‑‑ ‑‑ ‑‑ ‑‑ ‑‑

Benzonatate (PF‑00345410) mg/kg/day 0 10 30 90 0 5 15 50

‑‑‑‑‑‑‑‑‑‑‑‑‑‑‑‑‑‑‑‑‑‑‑‑‑‑‑‑‑‑‑‑‑‑‑‑‑‑‑‑‑‑‑‑‑‑‑‑‑‑‑‑‑‑‑‑‑‑‑‑‑‑‑‑‑‑‑‑‑‑‑‑‑‑‑‑‑‑‑‑‑‑‑‑‑‑‑‑‑‑‑‑‑‑‑‑‑‑‑‑‑‑‑‑‑‑‑‑

Tissue/ Group/Subgroup/Sex: 1/1/M 2/1/M 3/1/M 4/1/M 1/1/F 2/1/F 3/1/F 4/1/F

Observation Number of Animals:  33  24  31  28  25  23  24  30

‑‑‑‑‑‑‑‑‑‑‑‑‑‑‑‑‑‑‑‑‑‑‑‑‑‑‑‑‑‑‑‑‑‑‑‑‑‑‑‑‑‑‑‑‑‑‑‑‑‑‑‑‑‑‑‑‑‑‑‑‑‑‑‑‑‑‑‑‑‑‑‑‑‑‑‑‑‑‑‑‑‑‑‑‑‑‑‑‑‑‑‑‑‑‑‑‑‑‑‑‑‑‑‑‑‑‑‑

Foot/Footpad Number Examined:   8   3   5   2   0   2   3   2

Unremarkable:   0   1   0   0   0   0   0   0

Inflammation/hyperplasia

finding not present ‑   0   1   0   0   0   0   0   0

slight 2   4   1   1   1   0   1   3   0

moderate 3   2   1   2   1   0   1   0   2

marked 4   2   0   2   0   0   0   0   0

Total Incidence:   8   2   5   2   0   2   3   2

Average Severity:   2.8   2.5   3.2   2.5   0.0   2.5   2.0   3.0

Ulcer

finding not present ‑   4   3   2   2   0   2   3   0

minimal 1   0   0   0   0   0   0   0   1

slight 2   2   0   0   0   0   0   0   0

moderate 3   0   0   2   0   0   0   0   1

marked 4   2   0   1   0   0   0   0   0

Total Incidence:   4   0   3   0   0   0   0   2

Average Severity:   3.0   0.0   3.3   0.0   0.0   0.0   0.0   2.0

GALT/Peyer's Patch Number Examined:  31  24  30  28  24  22  21  27

Unremarkable:  31  24  30  28  24  22  21  27

‑‑‑‑‑‑‑‑‑‑‑‑‑‑‑‑‑‑‑‑‑‑‑‑‑‑‑‑‑‑‑‑‑‑‑‑‑‑‑‑‑‑‑‑‑‑‑‑‑‑‑‑‑‑‑‑‑‑‑‑‑‑‑‑‑‑‑‑‑‑‑‑‑‑‑‑‑‑‑‑‑‑‑‑‑‑‑‑‑‑‑‑‑‑‑‑‑‑‑‑‑‑‑‑‑‑‑

Table

Summary of Severity for Selected Microscopic Observations

Terminal Euthanasia (Dosing Phase)

Test Article (dosage) 1M 2M 3M 4M 1F 2F 3F 4F

‑‑‑‑‑‑‑‑‑‑‑‑‑‑‑‑‑‑‑‑‑‑‑‑‑‑‑ ‑‑‑‑‑‑‑‑ ‑‑ ‑‑ ‑‑ ‑‑ ‑‑ ‑‑ ‑‑ ‑‑

Benzonatate (PF‑00345410) mg/kg/day 0 10 30 90 0 5 15 50

‑‑‑‑‑‑‑‑‑‑‑‑‑‑‑‑‑‑‑‑‑‑‑‑‑‑‑‑‑‑‑‑‑‑‑‑‑‑‑‑‑‑‑‑‑‑‑‑‑‑‑‑‑‑‑‑‑‑‑‑‑‑‑‑‑‑‑‑‑‑‑‑‑‑‑‑‑‑‑‑‑‑‑‑‑‑‑‑‑‑‑‑‑‑‑‑‑‑‑‑‑‑‑‑‑‑‑‑

Tissue/ Group/Subgroup/Sex: 1/1/M 2/1/M 3/1/M 4/1/M 1/1/F 2/1/F 3/1/F 4/1/F

Observation Number of Animals:  33  24  31  28  25  23  24  30

‑‑‑‑‑‑‑‑‑‑‑‑‑‑‑‑‑‑‑‑‑‑‑‑‑‑‑‑‑‑‑‑‑‑‑‑‑‑‑‑‑‑‑‑‑‑‑‑‑‑‑‑‑‑‑‑‑‑‑‑‑‑‑‑‑‑‑‑‑‑‑‑‑‑‑‑‑‑‑‑‑‑‑‑‑‑‑‑‑‑‑‑‑‑‑‑‑‑‑‑‑‑‑‑‑‑‑‑

Harderian Gland Number Examined:  32  24  31  28  25  23  24  30

Unremarkable:  10  12  19  12  17  15  16  17

Degeneration

finding not present ‑  31  24  31  28  25  23  24  30

slight 2   1   0   0   0   0   0   0   0

Total Incidence:   1   0   0   0   0   0   0   0

Average Severity:   2.0   0.0   0.0   0.0   0.0   0.0   0.0   0.0

Hyperplasia

finding not present ‑  27  22  29  25  23  22  24  29

minimal 1   1   1   0   2   1   0   0   0

slight 2   1   1   1   1   0   1   0   1

moderate 3   2   0   1   0   1   0   0   0

marked 4   1   0   0   0   0   0   0   0

Total Incidence:   5   2   2   3   2   1   0   1

Average Severity:   2.6   1.5   2.5   1.3   2.0   2.0   0.0   2.0

Infiltrate, mononuclear cell

finding not present ‑  14  13  19  13  17  16  16  20

minimal 1  15   9   7  13   7   6   6   8

slight 2   3   2   5   2   1   1   2   2

Total Incidence:  18  11  12  15   8   7   8  10

Average Severity:   1.2   1.2   1.4   1.1   1.1   1.1   1.3   1.2

‑‑‑‑‑‑‑‑‑‑‑‑‑‑‑‑‑‑‑‑‑‑‑‑‑‑‑‑‑‑‑‑‑‑‑‑‑‑‑‑‑‑‑‑‑‑‑‑‑‑‑‑‑‑‑‑‑‑‑‑‑‑‑‑‑‑‑‑‑‑‑‑‑‑‑‑‑‑‑‑‑‑‑‑‑‑‑‑‑‑‑‑‑‑‑‑‑‑‑‑‑‑‑‑‑‑‑

Table

Summary of Severity for Selected Microscopic Observations

Terminal Euthanasia (Dosing Phase)

Test Article (dosage) 1M 2M 3M 4M 1F 2F 3F 4F

‑‑‑‑‑‑‑‑‑‑‑‑‑‑‑‑‑‑‑‑‑‑‑‑‑‑‑ ‑‑‑‑‑‑‑‑ ‑‑ ‑‑ ‑‑ ‑‑ ‑‑ ‑‑ ‑‑ ‑‑

Benzonatate (PF‑00345410) mg/kg/day 0 10 30 90 0 5 15 50

‑‑‑‑‑‑‑‑‑‑‑‑‑‑‑‑‑‑‑‑‑‑‑‑‑‑‑‑‑‑‑‑‑‑‑‑‑‑‑‑‑‑‑‑‑‑‑‑‑‑‑‑‑‑‑‑‑‑‑‑‑‑‑‑‑‑‑‑‑‑‑‑‑‑‑‑‑‑‑‑‑‑‑‑‑‑‑‑‑‑‑‑‑‑‑‑‑‑‑‑‑‑‑‑‑‑‑‑

Tissue/ Group/Subgroup/Sex: 1/1/M 2/1/M 3/1/M 4/1/M 1/1/F 2/1/F 3/1/F 4/1/F

Observation Number of Animals:  33  24  31  28  25  23  24  30

‑‑‑‑‑‑‑‑‑‑‑‑‑‑‑‑‑‑‑‑‑‑‑‑‑‑‑‑‑‑‑‑‑‑‑‑‑‑‑‑‑‑‑‑‑‑‑‑‑‑‑‑‑‑‑‑‑‑‑‑‑‑‑‑‑‑‑‑‑‑‑‑‑‑‑‑‑‑‑‑‑‑‑‑‑‑‑‑‑‑‑‑‑‑‑‑‑‑‑‑‑‑‑‑‑‑‑‑

Harderian Gland Number Examined:  32  24  31  28  25  23  24  30

Unremarkable:  10  12  19  12  17  15  16  17

Inflammation, chronic‑active

finding not present ‑  32  24  31  27  25  23  24  30

slight 2   0   0   0   1   0   0   0   0

Total Incidence:   0   0   0   1   0   0   0   0

Average Severity:   0.0   0.0   0.0   2.0   0.0   0.0   0.0   0.0

Inflammation, granulomatous

finding not present ‑  32  23  31  27  25  22  23  27

minimal 1   0   1   0   1   0   1   1   2

moderate 3   0   0   0   0   0   0   0   1

Total Incidence:   0   1   0   1   0   1   1   3

Average Severity:   0.0   1.0   0.0   1.0   0.0   1.0   1.0   1.7

‑‑‑‑‑‑‑‑‑‑‑‑‑‑‑‑‑‑‑‑‑‑‑‑‑‑‑‑‑‑‑‑‑‑‑‑‑‑‑‑‑‑‑‑‑‑‑‑‑‑‑‑‑‑‑‑‑‑‑‑‑‑‑‑‑‑‑‑‑‑‑‑‑‑‑‑‑‑‑‑‑‑‑‑‑‑‑‑‑‑‑‑‑‑‑‑‑‑‑‑‑‑‑‑‑‑‑

Table

Summary of Severity for Selected Microscopic Observations

Terminal Euthanasia (Dosing Phase)

Test Article (dosage) 1M 2M 3M 4M 1F 2F 3F 4F

‑‑‑‑‑‑‑‑‑‑‑‑‑‑‑‑‑‑‑‑‑‑‑‑‑‑‑ ‑‑‑‑‑‑‑‑ ‑‑ ‑‑ ‑‑ ‑‑ ‑‑ ‑‑ ‑‑ ‑‑

Benzonatate (PF‑00345410) mg/kg/day 0 10 30 90 0 5 15 50

‑‑‑‑‑‑‑‑‑‑‑‑‑‑‑‑‑‑‑‑‑‑‑‑‑‑‑‑‑‑‑‑‑‑‑‑‑‑‑‑‑‑‑‑‑‑‑‑‑‑‑‑‑‑‑‑‑‑‑‑‑‑‑‑‑‑‑‑‑‑‑‑‑‑‑‑‑‑‑‑‑‑‑‑‑‑‑‑‑‑‑‑‑‑‑‑‑‑‑‑‑‑‑‑‑‑‑‑

Tissue/ Group/Subgroup/Sex: 1/1/M 2/1/M 3/1/M 4/1/M 1/1/F 2/1/F 3/1/F 4/1/F

Observation Number of Animals:  33  24  31  28  25  23  24  30

‑‑‑‑‑‑‑‑‑‑‑‑‑‑‑‑‑‑‑‑‑‑‑‑‑‑‑‑‑‑‑‑‑‑‑‑‑‑‑‑‑‑‑‑‑‑‑‑‑‑‑‑‑‑‑‑‑‑‑‑‑‑‑‑‑‑‑‑‑‑‑‑‑‑‑‑‑‑‑‑‑‑‑‑‑‑‑‑‑‑‑‑‑‑‑‑‑‑‑‑‑‑‑‑‑‑‑‑

Heart Number Examined:  33  24  31  28  25  23  24  30

Unremarkable:   2   2   0   0   6   7   5   3

Cardiomyopathy, degenerative

finding not present ‑   2   2   1   0   6   7   5   3

minimal 1   7   4  10   6  16  11  13  20

slight 2  22  15  18  19   3   5   6   7

moderate 3   2   3   2   3   0   0   0   0

Total Incidence:  31  22  30  28  19  16  19  27

Average Severity:   1.8   2.0   1.7   1.9   1.2   1.3   1.3   1.3

Hyperplasia, endocardium

finding not present ‑  33  24  31  28  25  23  24  29

moderate 3   0   0   0   0   0   0   0   1

Total Incidence:   0   0   0   0   0   0   0   1

Average Severity:   0.0   0.0   0.0   0.0   0.0   0.0   0.0   3.0

Inflammation, vessel

finding not present ‑  33  24  30  28  25  23  24  30

slight 2   0   0   1   0   0   0   0   0

Total Incidence:   0   0   1   0   0   0   0   0

Average Severity:   0.0   0.0   2.0   0.0   0.0   0.0   0.0   0.0

‑‑‑‑‑‑‑‑‑‑‑‑‑‑‑‑‑‑‑‑‑‑‑‑‑‑‑‑‑‑‑‑‑‑‑‑‑‑‑‑‑‑‑‑‑‑‑‑‑‑‑‑‑‑‑‑‑‑‑‑‑‑‑‑‑‑‑‑‑‑‑‑‑‑‑‑‑‑‑‑‑‑‑‑‑‑‑‑‑‑‑‑‑‑‑‑‑‑‑‑‑‑‑‑‑‑‑

Table

Summary of Severity for Selected Microscopic Observations

Terminal Euthanasia (Dosing Phase)

Test Article (dosage) 1M 2M 3M 4M 1F 2F 3F 4F

‑‑‑‑‑‑‑‑‑‑‑‑‑‑‑‑‑‑‑‑‑‑‑‑‑‑‑ ‑‑‑‑‑‑‑‑ ‑‑ ‑‑ ‑‑ ‑‑ ‑‑ ‑‑ ‑‑ ‑‑

Benzonatate (PF‑00345410) mg/kg/day 0 10 30 90 0 5 15 50

‑‑‑‑‑‑‑‑‑‑‑‑‑‑‑‑‑‑‑‑‑‑‑‑‑‑‑‑‑‑‑‑‑‑‑‑‑‑‑‑‑‑‑‑‑‑‑‑‑‑‑‑‑‑‑‑‑‑‑‑‑‑‑‑‑‑‑‑‑‑‑‑‑‑‑‑‑‑‑‑‑‑‑‑‑‑‑‑‑‑‑‑‑‑‑‑‑‑‑‑‑‑‑‑‑‑‑‑

Tissue/ Group/Subgroup/Sex: 1/1/M 2/1/M 3/1/M 4/1/M 1/1/F 2/1/F 3/1/F 4/1/F

Observation Number of Animals:  33  24  31  28  25  23  24  30

‑‑‑‑‑‑‑‑‑‑‑‑‑‑‑‑‑‑‑‑‑‑‑‑‑‑‑‑‑‑‑‑‑‑‑‑‑‑‑‑‑‑‑‑‑‑‑‑‑‑‑‑‑‑‑‑‑‑‑‑‑‑‑‑‑‑‑‑‑‑‑‑‑‑‑‑‑‑‑‑‑‑‑‑‑‑‑‑‑‑‑‑‑‑‑‑‑‑‑‑‑‑‑‑‑‑‑‑

Ileum Number Examined:  33  24  31  28  25  23  24  30

Unremarkable:  33  24  31  27  25  23  24  30

Inflammation, chronic‑active

finding not present ‑  33  24  31  27  25  23  24  30

slight 2   0   0   0   1   0   0   0   0

Total Incidence:   0   0   0   1   0   0   0   0

Average Severity:   0.0   0.0   0.0   2.0   0.0   0.0   0.0   0.0

Jejunum Number Examined:  33  24  31  28  25  23  24  30

Unremarkable:  33  24  31  27  25  23  24  30

‑‑‑‑‑‑‑‑‑‑‑‑‑‑‑‑‑‑‑‑‑‑‑‑‑‑‑‑‑‑‑‑‑‑‑‑‑‑‑‑‑‑‑‑‑‑‑‑‑‑‑‑‑‑‑‑‑‑‑‑‑‑‑‑‑‑‑‑‑‑‑‑‑‑‑‑‑‑‑‑‑‑‑‑‑‑‑‑‑‑‑‑‑‑‑‑‑‑‑‑‑‑‑‑‑‑‑

Table

Summary of Severity for Selected Microscopic Observations

Terminal Euthanasia (Dosing Phase)

Test Article (dosage) 1M 2M 3M 4M 1F 2F 3F 4F

‑‑‑‑‑‑‑‑‑‑‑‑‑‑‑‑‑‑‑‑‑‑‑‑‑‑‑ ‑‑‑‑‑‑‑‑ ‑‑ ‑‑ ‑‑ ‑‑ ‑‑ ‑‑ ‑‑ ‑‑

Benzonatate (PF‑00345410) mg/kg/day 0 10 30 90 0 5 15 50

‑‑‑‑‑‑‑‑‑‑‑‑‑‑‑‑‑‑‑‑‑‑‑‑‑‑‑‑‑‑‑‑‑‑‑‑‑‑‑‑‑‑‑‑‑‑‑‑‑‑‑‑‑‑‑‑‑‑‑‑‑‑‑‑‑‑‑‑‑‑‑‑‑‑‑‑‑‑‑‑‑‑‑‑‑‑‑‑‑‑‑‑‑‑‑‑‑‑‑‑‑‑‑‑‑‑‑‑

Tissue/ Group/Subgroup/Sex: 1/1/M 2/1/M 3/1/M 4/1/M 1/1/F 2/1/F 3/1/F 4/1/F

Observation Number of Animals:  33  24  31  28  25  23  24  30

‑‑‑‑‑‑‑‑‑‑‑‑‑‑‑‑‑‑‑‑‑‑‑‑‑‑‑‑‑‑‑‑‑‑‑‑‑‑‑‑‑‑‑‑‑‑‑‑‑‑‑‑‑‑‑‑‑‑‑‑‑‑‑‑‑‑‑‑‑‑‑‑‑‑‑‑‑‑‑‑‑‑‑‑‑‑‑‑‑‑‑‑‑‑‑‑‑‑‑‑‑‑‑‑‑‑‑‑

Kidney Number Examined:  33  24  31  28  25  23  24  30

Unremarkable:   3   2   3   1   6   4   4   5

Cyst

finding not present ‑  32  24  28  27  24  22  24  30

minimal 1   1   0   1   0   0   0   0   0

slight 2   0   0   1   0   0   0   0   0

moderate 3   0   0   1   1   1   1   0   0

Total Incidence:   1   0   3   1   1   1   0   0

Average Severity:   1.0   0.0   2.0   3.0   3.0   3.0   0.0   0.0

Dilatation, pelvis

finding not present ‑  33  22  29  27  24  21  23  27

minimal 1   0   0   0   0   1   1   1   2

slight 2   0   2   1   1   0   1   0   1

moderate 3   0   0   1   0   0   0   0   0

Total Incidence:   0   2   2   1   1   2   1   3

Average Severity:   0.0   2.0   2.5   2.0   1.0   1.5   1.0   1.3

Dilatation, tubule(s)

finding not present ‑  33  24  31  28  25  22  24  30

moderate 3   0   0   0   0   0   1   0   0

Total Incidence:   0   0   0   0   0   1   0   0

Average Severity:   0.0   0.0   0.0   0.0   0.0   3.0   0.0   0.0

‑‑‑‑‑‑‑‑‑‑‑‑‑‑‑‑‑‑‑‑‑‑‑‑‑‑‑‑‑‑‑‑‑‑‑‑‑‑‑‑‑‑‑‑‑‑‑‑‑‑‑‑‑‑‑‑‑‑‑‑‑‑‑‑‑‑‑‑‑‑‑‑‑‑‑‑‑‑‑‑‑‑‑‑‑‑‑‑‑‑‑‑‑‑‑‑‑‑‑‑‑‑‑‑‑‑‑

Table

Summary of Severity for Selected Microscopic Observations

Terminal Euthanasia (Dosing Phase)

Test Article (dosage) 1M 2M 3M 4M 1F 2F 3F 4F

‑‑‑‑‑‑‑‑‑‑‑‑‑‑‑‑‑‑‑‑‑‑‑‑‑‑‑ ‑‑‑‑‑‑‑‑ ‑‑ ‑‑ ‑‑ ‑‑ ‑‑ ‑‑ ‑‑ ‑‑

Benzonatate (PF‑00345410) mg/kg/day 0 10 30 90 0 5 15 50

‑‑‑‑‑‑‑‑‑‑‑‑‑‑‑‑‑‑‑‑‑‑‑‑‑‑‑‑‑‑‑‑‑‑‑‑‑‑‑‑‑‑‑‑‑‑‑‑‑‑‑‑‑‑‑‑‑‑‑‑‑‑‑‑‑‑‑‑‑‑‑‑‑‑‑‑‑‑‑‑‑‑‑‑‑‑‑‑‑‑‑‑‑‑‑‑‑‑‑‑‑‑‑‑‑‑‑‑

Tissue/ Group/Subgroup/Sex: 1/1/M 2/1/M 3/1/M 4/1/M 1/1/F 2/1/F 3/1/F 4/1/F

Observation Number of Animals:  33  24  31  28  25  23  24  30

‑‑‑‑‑‑‑‑‑‑‑‑‑‑‑‑‑‑‑‑‑‑‑‑‑‑‑‑‑‑‑‑‑‑‑‑‑‑‑‑‑‑‑‑‑‑‑‑‑‑‑‑‑‑‑‑‑‑‑‑‑‑‑‑‑‑‑‑‑‑‑‑‑‑‑‑‑‑‑‑‑‑‑‑‑‑‑‑‑‑‑‑‑‑‑‑‑‑‑‑‑‑‑‑‑‑‑‑

Kidney Number Examined:  33  24  31  28  25  23  24  30

Unremarkable:   3   2   3   1   6   4   4   5

Hemorrhage/hematoma

finding not present ‑  32  24  31  28  25  23  24  30

moderate 3   1   0   0   0   0   0   0   0

Total Incidence:   1   0   0   0   0   0   0   0

Average Severity:   3.0   0.0   0.0   0.0   0.0   0.0   0.0   0.0

Hyperplasia, transitional cell

finding not present ‑  30  24  30  26   9  15  20  21

minimal 1   1   0   1   1  12   5   3   8

slight 2   2   0   0   1   3   2   1   1

moderate 3   0   0   0   0   1   1   0   0

Total Incidence:   3   0   1   2  16   8   4   9

Average Severity:   1.7   0.0   1.0   1.5   1.3   1.5   1.3   1.1

Hyperplasia, tubule cell

finding not present ‑  33  23  31  28  25  23  24  30

moderate 3   0   1   0   0   0   0   0   0

Total Incidence:   0   1   0   0   0   0   0   0

Average Severity:   0.0   3.0   0.0   0.0   0.0   0.0   0.0   0.0

‑‑‑‑‑‑‑‑‑‑‑‑‑‑‑‑‑‑‑‑‑‑‑‑‑‑‑‑‑‑‑‑‑‑‑‑‑‑‑‑‑‑‑‑‑‑‑‑‑‑‑‑‑‑‑‑‑‑‑‑‑‑‑‑‑‑‑‑‑‑‑‑‑‑‑‑‑‑‑‑‑‑‑‑‑‑‑‑‑‑‑‑‑‑‑‑‑‑‑‑‑‑‑‑‑‑‑

Table

Summary of Severity for Selected Microscopic Observations

Terminal Euthanasia (Dosing Phase)

Test Article (dosage) 1M 2M 3M 4M 1F 2F 3F 4F

‑‑‑‑‑‑‑‑‑‑‑‑‑‑‑‑‑‑‑‑‑‑‑‑‑‑‑ ‑‑‑‑‑‑‑‑ ‑‑ ‑‑ ‑‑ ‑‑ ‑‑ ‑‑ ‑‑ ‑‑

Benzonatate (PF‑00345410) mg/kg/day 0 10 30 90 0 5 15 50

‑‑‑‑‑‑‑‑‑‑‑‑‑‑‑‑‑‑‑‑‑‑‑‑‑‑‑‑‑‑‑‑‑‑‑‑‑‑‑‑‑‑‑‑‑‑‑‑‑‑‑‑‑‑‑‑‑‑‑‑‑‑‑‑‑‑‑‑‑‑‑‑‑‑‑‑‑‑‑‑‑‑‑‑‑‑‑‑‑‑‑‑‑‑‑‑‑‑‑‑‑‑‑‑‑‑‑‑

Tissue/ Group/Subgroup/Sex: 1/1/M 2/1/M 3/1/M 4/1/M 1/1/F 2/1/F 3/1/F 4/1/F

Observation Number of Animals:  33  24  31  28  25  23  24  30

‑‑‑‑‑‑‑‑‑‑‑‑‑‑‑‑‑‑‑‑‑‑‑‑‑‑‑‑‑‑‑‑‑‑‑‑‑‑‑‑‑‑‑‑‑‑‑‑‑‑‑‑‑‑‑‑‑‑‑‑‑‑‑‑‑‑‑‑‑‑‑‑‑‑‑‑‑‑‑‑‑‑‑‑‑‑‑‑‑‑‑‑‑‑‑‑‑‑‑‑‑‑‑‑‑‑‑‑

Kidney Number Examined:  33  24  31  28  25  23  24  30

Unremarkable:   3   2   3   1   6   4   4   5

Mineralization, pelvis

finding not present ‑  26  19  29  24   8  11   9  14

minimal 1   5   4   0   3  12   8  12  15

slight 2   2   1   2   1   5   3   3   1

moderate 3   0   0   0   0   0   1   0   0

Total Incidence:   7   5   2   4  17  12  15  16

Average Severity:   1.3   1.2   2.0   1.3   1.3   1.4   1.2   1.1

Nephropathy, chronic progressive

finding not present ‑   3   2   3   1  17   8   8  15

minimal 1  10   7  13  14   7   9  12  10

slight 2  13  11   8   9   1   6   4   5

moderate 3   6   3   6   4   0   0   0   0

marked 4   1   1   1   0   0   0   0   0

Total Incidence:  30  22  28  27   8  15  16  15

Average Severity:   1.9   1.9   1.8   1.6   1.1   1.4   1.3   1.3

Pyelonephritis

finding not present ‑  27  24  30  28  24  23  24  30

minimal 1   2   0   0   0   0   0   0   0

slight 2   4   0   1   0   1   0   0   0

Total Incidence:   6   0   1   0   1   0   0   0

Average Severity:   1.7   0.0   2.0   0.0   2.0   0.0   0.0   0.0

‑‑‑‑‑‑‑‑‑‑‑‑‑‑‑‑‑‑‑‑‑‑‑‑‑‑‑‑‑‑‑‑‑‑‑‑‑‑‑‑‑‑‑‑‑‑‑‑‑‑‑‑‑‑‑‑‑‑‑‑‑‑‑‑‑‑‑‑‑‑‑‑‑‑‑‑‑‑‑‑‑‑‑‑‑‑‑‑‑‑‑‑‑‑‑‑‑‑‑‑‑‑‑‑‑‑‑

Table

Summary of Severity for Selected Microscopic Observations

Terminal Euthanasia (Dosing Phase)

Test Article (dosage) 1M 2M 3M 4M 1F 2F 3F 4F

‑‑‑‑‑‑‑‑‑‑‑‑‑‑‑‑‑‑‑‑‑‑‑‑‑‑‑ ‑‑‑‑‑‑‑‑ ‑‑ ‑‑ ‑‑ ‑‑ ‑‑ ‑‑ ‑‑ ‑‑

Benzonatate (PF‑00345410) mg/kg/day 0 10 30 90 0 5 15 50

‑‑‑‑‑‑‑‑‑‑‑‑‑‑‑‑‑‑‑‑‑‑‑‑‑‑‑‑‑‑‑‑‑‑‑‑‑‑‑‑‑‑‑‑‑‑‑‑‑‑‑‑‑‑‑‑‑‑‑‑‑‑‑‑‑‑‑‑‑‑‑‑‑‑‑‑‑‑‑‑‑‑‑‑‑‑‑‑‑‑‑‑‑‑‑‑‑‑‑‑‑‑‑‑‑‑‑‑

Tissue/ Group/Subgroup/Sex: 1/1/M 2/1/M 3/1/M 4/1/M 1/1/F 2/1/F 3/1/F 4/1/F

Observation Number of Animals:  33  24  31  28  25  23  24  30

‑‑‑‑‑‑‑‑‑‑‑‑‑‑‑‑‑‑‑‑‑‑‑‑‑‑‑‑‑‑‑‑‑‑‑‑‑‑‑‑‑‑‑‑‑‑‑‑‑‑‑‑‑‑‑‑‑‑‑‑‑‑‑‑‑‑‑‑‑‑‑‑‑‑‑‑‑‑‑‑‑‑‑‑‑‑‑‑‑‑‑‑‑‑‑‑‑‑‑‑‑‑‑‑‑‑‑‑

Lacrimal Gland Number Examined:   2   0   1   5   0   0   0   0

Unremarkable:   1   0   0   0   0   0   0   0

Ectopic Harderian gland

finding not present ‑   1   0   0   0   0   0   0   0

minimal 1   0   0   0   2   0   0   0   0

slight 2   1   0   1   0   0   0   0   0

moderate 3   0   0   0   3   0   0   0   0

Total Incidence:   1   0   1   5   0   0   0   0

Average Severity:   2.0   0.0   2.0   2.2   0.0   0.0   0.0   0.0

‑‑‑‑‑‑‑‑‑‑‑‑‑‑‑‑‑‑‑‑‑‑‑‑‑‑‑‑‑‑‑‑‑‑‑‑‑‑‑‑‑‑‑‑‑‑‑‑‑‑‑‑‑‑‑‑‑‑‑‑‑‑‑‑‑‑‑‑‑‑‑‑‑‑‑‑‑‑‑‑‑‑‑‑‑‑‑‑‑‑‑‑‑‑‑‑‑‑‑‑‑‑‑‑‑‑‑

Table

Summary of Severity for Selected Microscopic Observations

Terminal Euthanasia (Dosing Phase)

Test Article (dosage) 1M 2M 3M 4M 1F 2F 3F 4F

‑‑‑‑‑‑‑‑‑‑‑‑‑‑‑‑‑‑‑‑‑‑‑‑‑‑‑ ‑‑‑‑‑‑‑‑ ‑‑ ‑‑ ‑‑ ‑‑ ‑‑ ‑‑ ‑‑ ‑‑

Benzonatate (PF‑00345410) mg/kg/day 0 10 30 90 0 5 15 50

‑‑‑‑‑‑‑‑‑‑‑‑‑‑‑‑‑‑‑‑‑‑‑‑‑‑‑‑‑‑‑‑‑‑‑‑‑‑‑‑‑‑‑‑‑‑‑‑‑‑‑‑‑‑‑‑‑‑‑‑‑‑‑‑‑‑‑‑‑‑‑‑‑‑‑‑‑‑‑‑‑‑‑‑‑‑‑‑‑‑‑‑‑‑‑‑‑‑‑‑‑‑‑‑‑‑‑‑

Tissue/ Group/Subgroup/Sex: 1/1/M 2/1/M 3/1/M 4/1/M 1/1/F 2/1/F 3/1/F 4/1/F

Observation Number of Animals:  33  24  31  28  25  23  24  30

‑‑‑‑‑‑‑‑‑‑‑‑‑‑‑‑‑‑‑‑‑‑‑‑‑‑‑‑‑‑‑‑‑‑‑‑‑‑‑‑‑‑‑‑‑‑‑‑‑‑‑‑‑‑‑‑‑‑‑‑‑‑‑‑‑‑‑‑‑‑‑‑‑‑‑‑‑‑‑‑‑‑‑‑‑‑‑‑‑‑‑‑‑‑‑‑‑‑‑‑‑‑‑‑‑‑‑‑

Liver Number Examined:  33  24  31  28  25  23  24  30

Unremarkable:   1   1   1   1   0   0   0   1

Angiectasis

finding not present ‑  28  19  29  25  22  18  22  26

minimal 1   0   2   1   0   1   3   0   1

slight 2   5   2   0   3   2   2   1   3

moderate 3   0   1   1   0   0   0   1   0

Total Incidence:   5   5   2   3   3   5   2   4

Average Severity:   2.0   1.8   2.0   2.0   1.7   1.4   2.5   1.8

Barbiturate lysis

finding not present ‑  33  24  31  27  25  23  24  29

slight 2   0   0   0   1   0   0   0   0

moderate 3   0   0   0   0   0   0   0   1

Total Incidence:   0   0   0   1   0   0   0   1

Average Severity:   0.0   0.0   0.0   2.0   0.0   0.0   0.0   3.0

Cyst, biliary

finding not present ‑  33  24  31  28  25  23  23  30

slight 2   0   0   0   0   0   0   1   0

Total Incidence:   0   0   0   0   0   0   1   0

Average Severity:   0.0   0.0   0.0   0.0   0.0   0.0   2.0   0.0

‑‑‑‑‑‑‑‑‑‑‑‑‑‑‑‑‑‑‑‑‑‑‑‑‑‑‑‑‑‑‑‑‑‑‑‑‑‑‑‑‑‑‑‑‑‑‑‑‑‑‑‑‑‑‑‑‑‑‑‑‑‑‑‑‑‑‑‑‑‑‑‑‑‑‑‑‑‑‑‑‑‑‑‑‑‑‑‑‑‑‑‑‑‑‑‑‑‑‑‑‑‑‑‑‑‑‑

Table

Summary of Severity for Selected Microscopic Observations

Terminal Euthanasia (Dosing Phase)

Test Article (dosage) 1M 2M 3M 4M 1F 2F 3F 4F

‑‑‑‑‑‑‑‑‑‑‑‑‑‑‑‑‑‑‑‑‑‑‑‑‑‑‑ ‑‑‑‑‑‑‑‑ ‑‑ ‑‑ ‑‑ ‑‑ ‑‑ ‑‑ ‑‑ ‑‑

Benzonatate (PF‑00345410) mg/kg/day 0 10 30 90 0 5 15 50

‑‑‑‑‑‑‑‑‑‑‑‑‑‑‑‑‑‑‑‑‑‑‑‑‑‑‑‑‑‑‑‑‑‑‑‑‑‑‑‑‑‑‑‑‑‑‑‑‑‑‑‑‑‑‑‑‑‑‑‑‑‑‑‑‑‑‑‑‑‑‑‑‑‑‑‑‑‑‑‑‑‑‑‑‑‑‑‑‑‑‑‑‑‑‑‑‑‑‑‑‑‑‑‑‑‑‑‑

Tissue/ Group/Subgroup/Sex: 1/1/M 2/1/M 3/1/M 4/1/M 1/1/F 2/1/F 3/1/F 4/1/F

Observation Number of Animals:  33  24  31  28  25  23  24  30

‑‑‑‑‑‑‑‑‑‑‑‑‑‑‑‑‑‑‑‑‑‑‑‑‑‑‑‑‑‑‑‑‑‑‑‑‑‑‑‑‑‑‑‑‑‑‑‑‑‑‑‑‑‑‑‑‑‑‑‑‑‑‑‑‑‑‑‑‑‑‑‑‑‑‑‑‑‑‑‑‑‑‑‑‑‑‑‑‑‑‑‑‑‑‑‑‑‑‑‑‑‑‑‑‑‑‑‑

Liver Number Examined:  33  24  31  28  25  23  24  30

Unremarkable:   1   1   1   1   0   0   0   1

Degeneration, cystic

finding not present ‑  28  24  31  25  23  23  24  30

minimal 1   2   0   0   3   0   0   0   0

slight 2   2   0   0   0   2   0   0   0

moderate 3   1   0   0   0   0   0   0   0

Total Incidence:   5   0   0   3   2   0   0   0

Average Severity:   1.8   0.0   0.0   1.0   2.0   0.0   0.0   0.0

Fibrosis/biliary hyperplasia

finding not present ‑  26  18  22  19   8  10  12  15

minimal 1   4   3   6   5   6   4   1   4

slight 2   3   1   3   2   3   2   4   2

moderate 3   0   2   0   2   8   6   7   8

marked 4   0   0   0   0   0   1   0   1

Total Incidence:   7   6   9   9  17  13  12  15

Average Severity:   1.4   1.8   1.3   1.7   2.1   2.3   2.5   2.4

‑‑‑‑‑‑‑‑‑‑‑‑‑‑‑‑‑‑‑‑‑‑‑‑‑‑‑‑‑‑‑‑‑‑‑‑‑‑‑‑‑‑‑‑‑‑‑‑‑‑‑‑‑‑‑‑‑‑‑‑‑‑‑‑‑‑‑‑‑‑‑‑‑‑‑‑‑‑‑‑‑‑‑‑‑‑‑‑‑‑‑‑‑‑‑‑‑‑‑‑‑‑‑‑‑‑‑

Table

Summary of Severity for Selected Microscopic Observations

Terminal Euthanasia (Dosing Phase)

Test Article (dosage) 1M 2M 3M 4M 1F 2F 3F 4F

‑‑‑‑‑‑‑‑‑‑‑‑‑‑‑‑‑‑‑‑‑‑‑‑‑‑‑ ‑‑‑‑‑‑‑‑ ‑‑ ‑‑ ‑‑ ‑‑ ‑‑ ‑‑ ‑‑ ‑‑

Benzonatate (PF‑00345410) mg/kg/day 0 10 30 90 0 5 15 50

‑‑‑‑‑‑‑‑‑‑‑‑‑‑‑‑‑‑‑‑‑‑‑‑‑‑‑‑‑‑‑‑‑‑‑‑‑‑‑‑‑‑‑‑‑‑‑‑‑‑‑‑‑‑‑‑‑‑‑‑‑‑‑‑‑‑‑‑‑‑‑‑‑‑‑‑‑‑‑‑‑‑‑‑‑‑‑‑‑‑‑‑‑‑‑‑‑‑‑‑‑‑‑‑‑‑‑‑

Tissue/ Group/Subgroup/Sex: 1/1/M 2/1/M 3/1/M 4/1/M 1/1/F 2/1/F 3/1/F 4/1/F

Observation Number of Animals:  33  24  31  28  25  23  24  30

‑‑‑‑‑‑‑‑‑‑‑‑‑‑‑‑‑‑‑‑‑‑‑‑‑‑‑‑‑‑‑‑‑‑‑‑‑‑‑‑‑‑‑‑‑‑‑‑‑‑‑‑‑‑‑‑‑‑‑‑‑‑‑‑‑‑‑‑‑‑‑‑‑‑‑‑‑‑‑‑‑‑‑‑‑‑‑‑‑‑‑‑‑‑‑‑‑‑‑‑‑‑‑‑‑‑‑‑

Liver Number Examined:  33  24  31  28  25  23  24  30

Unremarkable:   1   1   1   1   0   0   0   1

Focus, cellular alteration,

basophilic

finding not present ‑  10   8   4   7   3   0   4   6

minimal 1   9   4   3   5   3   2   2   0

slight 2  10   4  13   5   2   2   4   7

moderate 3   4   7   8   6   5   7   3   4

marked 4   0   1   2   5   9   6   6  11

severe 5   0   0   1   0   3   6   5   2

Total Incidence:  23  16  27  21  22  23  20  24

Average Severity:   1.8   2.3   2.4   2.5   3.3   3.5   3.4   3.3

Focus, cellular alteration, clear

finding not present ‑  33  24  31  28  24  23  24  30

slight 2   0   0   0   0   1   0   0   0

Total Incidence:   0   0   0   0   1   0   0   0

Average Severity:   0.0   0.0   0.0   0.0   2.0   0.0   0.0   0.0

‑‑‑‑‑‑‑‑‑‑‑‑‑‑‑‑‑‑‑‑‑‑‑‑‑‑‑‑‑‑‑‑‑‑‑‑‑‑‑‑‑‑‑‑‑‑‑‑‑‑‑‑‑‑‑‑‑‑‑‑‑‑‑‑‑‑‑‑‑‑‑‑‑‑‑‑‑‑‑‑‑‑‑‑‑‑‑‑‑‑‑‑‑‑‑‑‑‑‑‑‑‑‑‑‑‑‑

Table

Summary of Severity for Selected Microscopic Observations

Terminal Euthanasia (Dosing Phase)

Test Article (dosage) 1M 2M 3M 4M 1F 2F 3F 4F

‑‑‑‑‑‑‑‑‑‑‑‑‑‑‑‑‑‑‑‑‑‑‑‑‑‑‑ ‑‑‑‑‑‑‑‑ ‑‑ ‑‑ ‑‑ ‑‑ ‑‑ ‑‑ ‑‑ ‑‑

Benzonatate (PF‑00345410) mg/kg/day 0 10 30 90 0 5 15 50

‑‑‑‑‑‑‑‑‑‑‑‑‑‑‑‑‑‑‑‑‑‑‑‑‑‑‑‑‑‑‑‑‑‑‑‑‑‑‑‑‑‑‑‑‑‑‑‑‑‑‑‑‑‑‑‑‑‑‑‑‑‑‑‑‑‑‑‑‑‑‑‑‑‑‑‑‑‑‑‑‑‑‑‑‑‑‑‑‑‑‑‑‑‑‑‑‑‑‑‑‑‑‑‑‑‑‑‑

Tissue/ Group/Subgroup/Sex: 1/1/M 2/1/M 3/1/M 4/1/M 1/1/F 2/1/F 3/1/F 4/1/F

Observation Number of Animals:  33  24  31  28  25  23  24  30

‑‑‑‑‑‑‑‑‑‑‑‑‑‑‑‑‑‑‑‑‑‑‑‑‑‑‑‑‑‑‑‑‑‑‑‑‑‑‑‑‑‑‑‑‑‑‑‑‑‑‑‑‑‑‑‑‑‑‑‑‑‑‑‑‑‑‑‑‑‑‑‑‑‑‑‑‑‑‑‑‑‑‑‑‑‑‑‑‑‑‑‑‑‑‑‑‑‑‑‑‑‑‑‑‑‑‑‑

Liver Number Examined:  33  24  31  28  25  23  24  30

Unremarkable:   1   1   1   1   0   0   0   1

Focus, cellular alteration,

eosinophilic

finding not present ‑  21  12  17  18  19  19  18  22

minimal 1   2   3   3   0   2   0   2   0

slight 2   4   3   7   5   2   4   2   4

moderate 3   6   5   4   4   1   0   1   1

marked 4   0   1   0   1   1   0   1   3

Total Incidence:  12  12  14  10   6   4   6   8

Average Severity:   2.3   2.3   2.1   2.6   2.2   2.0   2.2   2.9

Hematopoiesis, extramedullary

finding not present ‑  33  22  31  28  25  22  24  29

minimal 1   0   0   0   0   0   1   0   0

slight 2   0   1   0   0   0   0   0   1

moderate 3   0   1   0   0   0   0   0   0

Total Incidence:   0   2   0   0   0   1   0   1

Average Severity:   0.0   2.5   0.0   0.0   0.0   1.0   0.0   2.0

Hyperplasia, Kupffer cell

finding not present ‑  33  23  31  28  25  23  24  30

moderate 3   0   1   0   0   0   0   0   0

Total Incidence:   0   1   0   0   0   0   0   0

Average Severity:   0.0   3.0   0.0   0.0   0.0   0.0   0.0   0.0

‑‑‑‑‑‑‑‑‑‑‑‑‑‑‑‑‑‑‑‑‑‑‑‑‑‑‑‑‑‑‑‑‑‑‑‑‑‑‑‑‑‑‑‑‑‑‑‑‑‑‑‑‑‑‑‑‑‑‑‑‑‑‑‑‑‑‑‑‑‑‑‑‑‑‑‑‑‑‑‑‑‑‑‑‑‑‑‑‑‑‑‑‑‑‑‑‑‑‑‑‑‑‑‑‑‑‑

Table

Summary of Severity for Selected Microscopic Observations

Terminal Euthanasia (Dosing Phase)

Test Article (dosage) 1M 2M 3M 4M 1F 2F 3F 4F

‑‑‑‑‑‑‑‑‑‑‑‑‑‑‑‑‑‑‑‑‑‑‑‑‑‑‑ ‑‑‑‑‑‑‑‑ ‑‑ ‑‑ ‑‑ ‑‑ ‑‑ ‑‑ ‑‑ ‑‑

Benzonatate (PF‑00345410) mg/kg/day 0 10 30 90 0 5 15 50

‑‑‑‑‑‑‑‑‑‑‑‑‑‑‑‑‑‑‑‑‑‑‑‑‑‑‑‑‑‑‑‑‑‑‑‑‑‑‑‑‑‑‑‑‑‑‑‑‑‑‑‑‑‑‑‑‑‑‑‑‑‑‑‑‑‑‑‑‑‑‑‑‑‑‑‑‑‑‑‑‑‑‑‑‑‑‑‑‑‑‑‑‑‑‑‑‑‑‑‑‑‑‑‑‑‑‑‑

Tissue/ Group/Subgroup/Sex: 1/1/M 2/1/M 3/1/M 4/1/M 1/1/F 2/1/F 3/1/F 4/1/F

Observation Number of Animals:  33  24  31  28  25  23  24  30

‑‑‑‑‑‑‑‑‑‑‑‑‑‑‑‑‑‑‑‑‑‑‑‑‑‑‑‑‑‑‑‑‑‑‑‑‑‑‑‑‑‑‑‑‑‑‑‑‑‑‑‑‑‑‑‑‑‑‑‑‑‑‑‑‑‑‑‑‑‑‑‑‑‑‑‑‑‑‑‑‑‑‑‑‑‑‑‑‑‑‑‑‑‑‑‑‑‑‑‑‑‑‑‑‑‑‑‑

Liver Number Examined:  33  24  31  28  25  23  24  30

Unremarkable:   1   1   1   1   0   0   0   1

Infiltrate, mononuclear cell

finding not present ‑  14  13  16  12   8  10  13  15

minimal 1  16   6  10  11   9   4  10   8

slight 2   3   5   4   5   8   9   1   7

moderate 3   0   0   1   0   0   0   0   0

Total Incidence:  19  11  15  16  17  13  11  15

Average Severity:   1.2   1.5   1.4   1.3   1.5   1.7   1.1   1.5

Lipidosis, tension

finding not present ‑  33  24  31  27  25  23  24  30

moderate 3   0   0   0   1   0   0   0   0

Total Incidence:   0   0   0   1   0   0   0   0

Average Severity:   0.0   0.0   0.0   3.0   0.0   0.0   0.0   0.0

Mitosis, hepatocyte, increased

finding not present ‑  33  24  31  28  25  22  24  30

minimal 1   0   0   0   0   0   1   0   0

Total Incidence:   0   0   0   0   0   1   0   0

Average Severity:   0.0   0.0   0.0   0.0   0.0   1.0   0.0   0.0

‑‑‑‑‑‑‑‑‑‑‑‑‑‑‑‑‑‑‑‑‑‑‑‑‑‑‑‑‑‑‑‑‑‑‑‑‑‑‑‑‑‑‑‑‑‑‑‑‑‑‑‑‑‑‑‑‑‑‑‑‑‑‑‑‑‑‑‑‑‑‑‑‑‑‑‑‑‑‑‑‑‑‑‑‑‑‑‑‑‑‑‑‑‑‑‑‑‑‑‑‑‑‑‑‑‑‑

Table

Summary of Severity for Selected Microscopic Observations

Terminal Euthanasia (Dosing Phase)

Test Article (dosage) 1M 2M 3M 4M 1F 2F 3F 4F

‑‑‑‑‑‑‑‑‑‑‑‑‑‑‑‑‑‑‑‑‑‑‑‑‑‑‑ ‑‑‑‑‑‑‑‑ ‑‑ ‑‑ ‑‑ ‑‑ ‑‑ ‑‑ ‑‑ ‑‑

Benzonatate (PF‑00345410) mg/kg/day 0 10 30 90 0 5 15 50

‑‑‑‑‑‑‑‑‑‑‑‑‑‑‑‑‑‑‑‑‑‑‑‑‑‑‑‑‑‑‑‑‑‑‑‑‑‑‑‑‑‑‑‑‑‑‑‑‑‑‑‑‑‑‑‑‑‑‑‑‑‑‑‑‑‑‑‑‑‑‑‑‑‑‑‑‑‑‑‑‑‑‑‑‑‑‑‑‑‑‑‑‑‑‑‑‑‑‑‑‑‑‑‑‑‑‑‑

Tissue/ Group/Subgroup/Sex: 1/1/M 2/1/M 3/1/M 4/1/M 1/1/F 2/1/F 3/1/F 4/1/F

Observation Number of Animals:  33  24  31  28  25  23  24  30

‑‑‑‑‑‑‑‑‑‑‑‑‑‑‑‑‑‑‑‑‑‑‑‑‑‑‑‑‑‑‑‑‑‑‑‑‑‑‑‑‑‑‑‑‑‑‑‑‑‑‑‑‑‑‑‑‑‑‑‑‑‑‑‑‑‑‑‑‑‑‑‑‑‑‑‑‑‑‑‑‑‑‑‑‑‑‑‑‑‑‑‑‑‑‑‑‑‑‑‑‑‑‑‑‑‑‑‑

Liver Number Examined:  33  24  31  28  25  23  24  30

Unremarkable:   1   1   1   1   0   0   0   1

Multinucleated hepatocyte,

increased

finding not present ‑  33  24  31  28  22  23  23  26

minimal 1   0   0   0   0   2   0   1   0

slight 2   0   0   0   0   1   0   0   4

Total Incidence:   0   0   0   0   3   0   1   4

Average Severity:   0.0   0.0   0.0   0.0   1.3   0.0   1.0   2.0

Necrosis, hepatocyte

finding not present ‑  33  24  31  26  24  23  24  29

minimal 1   0   0   0   1   0   0   0   0

slight 2   0   0   0   1   1   0   0   1

Total Incidence:   0   0   0   2   1   0   0   1

Average Severity:   0.0   0.0   0.0   1.5   2.0   0.0   0.0   2.0

Pigment, increased

finding not present ‑  33  24  31  28  24  23  24  30

marked 4   0   0   0   0   1   0   0   0

Total Incidence:   0   0   0   0   1   0   0   0

Average Severity:   0.0   0.0   0.0   0.0   4.0   0.0   0.0   0.0

‑‑‑‑‑‑‑‑‑‑‑‑‑‑‑‑‑‑‑‑‑‑‑‑‑‑‑‑‑‑‑‑‑‑‑‑‑‑‑‑‑‑‑‑‑‑‑‑‑‑‑‑‑‑‑‑‑‑‑‑‑‑‑‑‑‑‑‑‑‑‑‑‑‑‑‑‑‑‑‑‑‑‑‑‑‑‑‑‑‑‑‑‑‑‑‑‑‑‑‑‑‑‑‑‑‑‑

Table

Summary of Severity for Selected Microscopic Observations

Terminal Euthanasia (Dosing Phase)

Test Article (dosage) 1M 2M 3M 4M 1F 2F 3F 4F

‑‑‑‑‑‑‑‑‑‑‑‑‑‑‑‑‑‑‑‑‑‑‑‑‑‑‑ ‑‑‑‑‑‑‑‑ ‑‑ ‑‑ ‑‑ ‑‑ ‑‑ ‑‑ ‑‑ ‑‑

Benzonatate (PF‑00345410) mg/kg/day 0 10 30 90 0 5 15 50

‑‑‑‑‑‑‑‑‑‑‑‑‑‑‑‑‑‑‑‑‑‑‑‑‑‑‑‑‑‑‑‑‑‑‑‑‑‑‑‑‑‑‑‑‑‑‑‑‑‑‑‑‑‑‑‑‑‑‑‑‑‑‑‑‑‑‑‑‑‑‑‑‑‑‑‑‑‑‑‑‑‑‑‑‑‑‑‑‑‑‑‑‑‑‑‑‑‑‑‑‑‑‑‑‑‑‑‑

Tissue/ Group/Subgroup/Sex: 1/1/M 2/1/M 3/1/M 4/1/M 1/1/F 2/1/F 3/1/F 4/1/F

Observation Number of Animals:  33  24  31  28  25  23  24  30

‑‑‑‑‑‑‑‑‑‑‑‑‑‑‑‑‑‑‑‑‑‑‑‑‑‑‑‑‑‑‑‑‑‑‑‑‑‑‑‑‑‑‑‑‑‑‑‑‑‑‑‑‑‑‑‑‑‑‑‑‑‑‑‑‑‑‑‑‑‑‑‑‑‑‑‑‑‑‑‑‑‑‑‑‑‑‑‑‑‑‑‑‑‑‑‑‑‑‑‑‑‑‑‑‑‑‑‑

Liver Number Examined:  33  24  31  28  25  23  24  30

Unremarkable:   1   1   1   1   0   0   0   1

Vacuolation, increased, hepatocyte

finding not present ‑  29  13  21  25  20  20  22  26

minimal 1   0   4   1   2   1   0   1   0

slight 2   3   4   8   0   4   2   1   3

moderate 3   1   2   1   1   0   0   0   1

marked 4   0   1   0   0   0   1   0   0

Total Incidence:   4  11  10   3   5   3   2   4

Average Severity:   2.3   2.0   2.0   1.7   1.8   2.7   1.5   2.3

‑‑‑‑‑‑‑‑‑‑‑‑‑‑‑‑‑‑‑‑‑‑‑‑‑‑‑‑‑‑‑‑‑‑‑‑‑‑‑‑‑‑‑‑‑‑‑‑‑‑‑‑‑‑‑‑‑‑‑‑‑‑‑‑‑‑‑‑‑‑‑‑‑‑‑‑‑‑‑‑‑‑‑‑‑‑‑‑‑‑‑‑‑‑‑‑‑‑‑‑‑‑‑‑‑‑‑

Table

Summary of Severity for Selected Microscopic Observations

Terminal Euthanasia (Dosing Phase)

Test Article (dosage) 1M 2M 3M 4M 1F 2F 3F 4F

‑‑‑‑‑‑‑‑‑‑‑‑‑‑‑‑‑‑‑‑‑‑‑‑‑‑‑ ‑‑‑‑‑‑‑‑ ‑‑ ‑‑ ‑‑ ‑‑ ‑‑ ‑‑ ‑‑ ‑‑

Benzonatate (PF‑00345410) mg/kg/day 0 10 30 90 0 5 15 50

‑‑‑‑‑‑‑‑‑‑‑‑‑‑‑‑‑‑‑‑‑‑‑‑‑‑‑‑‑‑‑‑‑‑‑‑‑‑‑‑‑‑‑‑‑‑‑‑‑‑‑‑‑‑‑‑‑‑‑‑‑‑‑‑‑‑‑‑‑‑‑‑‑‑‑‑‑‑‑‑‑‑‑‑‑‑‑‑‑‑‑‑‑‑‑‑‑‑‑‑‑‑‑‑‑‑‑‑

Tissue/ Group/Subgroup/Sex: 1/1/M 2/1/M 3/1/M 4/1/M 1/1/F 2/1/F 3/1/F 4/1/F

Observation Number of Animals:  33  24  31  28  25  23  24  30

‑‑‑‑‑‑‑‑‑‑‑‑‑‑‑‑‑‑‑‑‑‑‑‑‑‑‑‑‑‑‑‑‑‑‑‑‑‑‑‑‑‑‑‑‑‑‑‑‑‑‑‑‑‑‑‑‑‑‑‑‑‑‑‑‑‑‑‑‑‑‑‑‑‑‑‑‑‑‑‑‑‑‑‑‑‑‑‑‑‑‑‑‑‑‑‑‑‑‑‑‑‑‑‑‑‑‑‑

Lung Number Examined:  33  24  31  28  25  23  24  30

Unremarkable:  23  15  19  22  16  15  19  22

Granuloma

finding not present ‑  30  23  30  28  25  21  24  29

minimal 1   2   1   1   0   0   2   0   1

slight 2   1   0   0   0   0   0   0   0

Total Incidence:   3   1   1   0   0   2   0   1

Average Severity:   1.3   1.0   1.0   0.0   0.0   1.0   0.0   1.0

Hyperplasia, epithelium, alveolus

finding not present ‑  33  23  30  28  25  23  24  30

minimal 1   0   1   1   0   0   0   0   0

Total Incidence:   0   1   1   0   0   0   0   0

Average Severity:   0.0   1.0   1.0   0.0   0.0   0.0   0.0   0.0

Infiltrate, macrophages, alveolus

finding not present ‑  33  24  31  28  25  23  23  30

slight 2   0   0   0   0   0   0   1   0

Total Incidence:   0   0   0   0   0   0   1   0

Average Severity:   0.0   0.0   0.0   0.0   0.0   0.0   2.0   0.0

‑‑‑‑‑‑‑‑‑‑‑‑‑‑‑‑‑‑‑‑‑‑‑‑‑‑‑‑‑‑‑‑‑‑‑‑‑‑‑‑‑‑‑‑‑‑‑‑‑‑‑‑‑‑‑‑‑‑‑‑‑‑‑‑‑‑‑‑‑‑‑‑‑‑‑‑‑‑‑‑‑‑‑‑‑‑‑‑‑‑‑‑‑‑‑‑‑‑‑‑‑‑‑‑‑‑‑

Table

Summary of Severity for Selected Microscopic Observations

Terminal Euthanasia (Dosing Phase)

Test Article (dosage) 1M 2M 3M 4M 1F 2F 3F 4F

‑‑‑‑‑‑‑‑‑‑‑‑‑‑‑‑‑‑‑‑‑‑‑‑‑‑‑ ‑‑‑‑‑‑‑‑ ‑‑ ‑‑ ‑‑ ‑‑ ‑‑ ‑‑ ‑‑ ‑‑

Benzonatate (PF‑00345410) mg/kg/day 0 10 30 90 0 5 15 50

‑‑‑‑‑‑‑‑‑‑‑‑‑‑‑‑‑‑‑‑‑‑‑‑‑‑‑‑‑‑‑‑‑‑‑‑‑‑‑‑‑‑‑‑‑‑‑‑‑‑‑‑‑‑‑‑‑‑‑‑‑‑‑‑‑‑‑‑‑‑‑‑‑‑‑‑‑‑‑‑‑‑‑‑‑‑‑‑‑‑‑‑‑‑‑‑‑‑‑‑‑‑‑‑‑‑‑‑

Tissue/ Group/Subgroup/Sex: 1/1/M 2/1/M 3/1/M 4/1/M 1/1/F 2/1/F 3/1/F 4/1/F

Observation Number of Animals:  33  24  31  28  25  23  24  30

‑‑‑‑‑‑‑‑‑‑‑‑‑‑‑‑‑‑‑‑‑‑‑‑‑‑‑‑‑‑‑‑‑‑‑‑‑‑‑‑‑‑‑‑‑‑‑‑‑‑‑‑‑‑‑‑‑‑‑‑‑‑‑‑‑‑‑‑‑‑‑‑‑‑‑‑‑‑‑‑‑‑‑‑‑‑‑‑‑‑‑‑‑‑‑‑‑‑‑‑‑‑‑‑‑‑‑‑

Lung Number Examined:  33  24  31  28  25  23  24  30

Unremarkable:  23  15  19  22  16  15  19  22

Infiltrate, macrophages,

vacuolated

finding not present ‑  24  17  21  22  17  17  20  23

minimal 1   6   5   6   4   7   2   2   5

slight 2   3   2   4   1   1   3   2   2

moderate 3   0   0   0   1   0   1   0   0

Total Incidence:   9   7  10   6   8   6   4   7

Average Severity:   1.3   1.3   1.4   1.5   1.1   1.8   1.5   1.3

Inflammation, mixed cell

finding not present ‑  32  23  29  27  22  20  23  29

minimal 1   0   1   2   0   3   2   1   1

slight 2   1   0   0   1   0   1   0   0

Total Incidence:   1   1   2   1   3   3   1   1

Average Severity:   2.0   1.0   1.0   2.0   1.0   1.3   1.0   1.0

Pigment

finding not present ‑  33  24  30  28  25  23  23  30

minimal 1   0   0   1   0   0   0   0   0

slight 2   0   0   0   0   0   0   1   0

Total Incidence:   0   0   1   0   0   0   1   0

Average Severity:   0.0   0.0   1.0   0.0   0.0   0.0   2.0   0.0

‑‑‑‑‑‑‑‑‑‑‑‑‑‑‑‑‑‑‑‑‑‑‑‑‑‑‑‑‑‑‑‑‑‑‑‑‑‑‑‑‑‑‑‑‑‑‑‑‑‑‑‑‑‑‑‑‑‑‑‑‑‑‑‑‑‑‑‑‑‑‑‑‑‑‑‑‑‑‑‑‑‑‑‑‑‑‑‑‑‑‑‑‑‑‑‑‑‑‑‑‑‑‑‑‑‑‑

Table

Summary of Severity for Selected Microscopic Observations

Terminal Euthanasia (Dosing Phase)

Test Article (dosage) 1M 2M 3M 4M 1F 2F 3F 4F

‑‑‑‑‑‑‑‑‑‑‑‑‑‑‑‑‑‑‑‑‑‑‑‑‑‑‑ ‑‑‑‑‑‑‑‑ ‑‑ ‑‑ ‑‑ ‑‑ ‑‑ ‑‑ ‑‑ ‑‑

Benzonatate (PF‑00345410) mg/kg/day 0 10 30 90 0 5 15 50

‑‑‑‑‑‑‑‑‑‑‑‑‑‑‑‑‑‑‑‑‑‑‑‑‑‑‑‑‑‑‑‑‑‑‑‑‑‑‑‑‑‑‑‑‑‑‑‑‑‑‑‑‑‑‑‑‑‑‑‑‑‑‑‑‑‑‑‑‑‑‑‑‑‑‑‑‑‑‑‑‑‑‑‑‑‑‑‑‑‑‑‑‑‑‑‑‑‑‑‑‑‑‑‑‑‑‑‑

Tissue/ Group/Subgroup/Sex: 1/1/M 2/1/M 3/1/M 4/1/M 1/1/F 2/1/F 3/1/F 4/1/F

Observation Number of Animals:  33  24  31  28  25  23  24  30

‑‑‑‑‑‑‑‑‑‑‑‑‑‑‑‑‑‑‑‑‑‑‑‑‑‑‑‑‑‑‑‑‑‑‑‑‑‑‑‑‑‑‑‑‑‑‑‑‑‑‑‑‑‑‑‑‑‑‑‑‑‑‑‑‑‑‑‑‑‑‑‑‑‑‑‑‑‑‑‑‑‑‑‑‑‑‑‑‑‑‑‑‑‑‑‑‑‑‑‑‑‑‑‑‑‑‑‑

Lymph Node,

Inguinal Number Examined: 29 20 29 26 23 19 18 24

Unremarkable: 27 20 29 25 22 19 18 24

Dilatation, sinus

finding not present ‑  29  20  29  25  23  19  18  24

slight 2   0   0   0   1   0   0   0   0

Total Incidence:   0   0   0   1   0   0   0   0

Average Severity:   0.0   0.0   0.0   2.0   0.0   0.0   0.0   0.0

Hyperplasia, lymphocytes

finding not present ‑  27  20  29  25  23  19  18  24

slight 2   2   0   0   1   0   0   0   0

Total Incidence:   2   0   0   1   0   0   0   0

Average Severity:   2.0   0.0   0.0   2.0   0.0   0.0   0.0   0.0

‑‑‑‑‑‑‑‑‑‑‑‑‑‑‑‑‑‑‑‑‑‑‑‑‑‑‑‑‑‑‑‑‑‑‑‑‑‑‑‑‑‑‑‑‑‑‑‑‑‑‑‑‑‑‑‑‑‑‑‑‑‑‑‑‑‑‑‑‑‑‑‑‑‑‑‑‑‑‑‑‑‑‑‑‑‑‑‑‑‑‑‑‑‑‑‑‑‑‑‑‑‑‑‑‑‑‑

Table

Summary of Severity for Selected Microscopic Observations

Terminal Euthanasia (Dosing Phase)

Test Article (dosage) 1M 2M 3M 4M 1F 2F 3F 4F

‑‑‑‑‑‑‑‑‑‑‑‑‑‑‑‑‑‑‑‑‑‑‑‑‑‑‑ ‑‑‑‑‑‑‑‑ ‑‑ ‑‑ ‑‑ ‑‑ ‑‑ ‑‑ ‑‑ ‑‑

Benzonatate (PF‑00345410) mg/kg/day 0 10 30 90 0 5 15 50

‑‑‑‑‑‑‑‑‑‑‑‑‑‑‑‑‑‑‑‑‑‑‑‑‑‑‑‑‑‑‑‑‑‑‑‑‑‑‑‑‑‑‑‑‑‑‑‑‑‑‑‑‑‑‑‑‑‑‑‑‑‑‑‑‑‑‑‑‑‑‑‑‑‑‑‑‑‑‑‑‑‑‑‑‑‑‑‑‑‑‑‑‑‑‑‑‑‑‑‑‑‑‑‑‑‑‑‑

Tissue/ Group/Subgroup/Sex: 1/1/M 2/1/M 3/1/M 4/1/M 1/1/F 2/1/F 3/1/F 4/1/F

Observation Number of Animals:  33  24  31  28  25  23  24  30

‑‑‑‑‑‑‑‑‑‑‑‑‑‑‑‑‑‑‑‑‑‑‑‑‑‑‑‑‑‑‑‑‑‑‑‑‑‑‑‑‑‑‑‑‑‑‑‑‑‑‑‑‑‑‑‑‑‑‑‑‑‑‑‑‑‑‑‑‑‑‑‑‑‑‑‑‑‑‑‑‑‑‑‑‑‑‑‑‑‑‑‑‑‑‑‑‑‑‑‑‑‑‑‑‑‑‑‑

Lymph Node,

Mesenteric Number Examined: 33 24 31 28 25 23 24 30

Unremarkable: 26 21 23 23 22 21 18 26

Angiectasis

finding not present ‑  33  24  30  27  25  23  24  30

moderate 3   0   0   0   1   0   0   0   0

marked 4   0   0   1   0   0   0   0   0

Total Incidence:   0   0   1   1   0   0   0   0

Average Severity:   0.0   0.0   4.0   3.0   0.0   0.0   0.0   0.0

Erythrocytes, sinus, increased

finding not present ‑  30  23  29  25  24  22  19  29

minimal 1   0   1   0   1   1   1   0   0

slight 2   3   0   1   2   0   0   3   1

moderate 3   0   0   1   0   0   0   2   0

Total Incidence:   3   1   2   3   1   1   5   1

Average Severity:   2.0   1.0   2.5   1.7   1.0   1.0   2.4   2.0

Inflammation

finding not present ‑  33  24  31  28  25  22  24  30

minimal 1   0   0   0   0   0   1   0   0

Total Incidence:   0   0   0   0   0   1   0   0

Average Severity:   0.0   0.0   0.0   0.0   0.0   1.0   0.0   0.0

‑‑‑‑‑‑‑‑‑‑‑‑‑‑‑‑‑‑‑‑‑‑‑‑‑‑‑‑‑‑‑‑‑‑‑‑‑‑‑‑‑‑‑‑‑‑‑‑‑‑‑‑‑‑‑‑‑‑‑‑‑‑‑‑‑‑‑‑‑‑‑‑‑‑‑‑‑‑‑‑‑‑‑‑‑‑‑‑‑‑‑‑‑‑‑‑‑‑‑‑‑‑‑‑‑‑‑

Table

Summary of Severity for Selected Microscopic Observations

Terminal Euthanasia (Dosing Phase)

Test Article (dosage) 1M 2M 3M 4M 1F 2F 3F 4F

‑‑‑‑‑‑‑‑‑‑‑‑‑‑‑‑‑‑‑‑‑‑‑‑‑‑‑ ‑‑‑‑‑‑‑‑ ‑‑ ‑‑ ‑‑ ‑‑ ‑‑ ‑‑ ‑‑ ‑‑

Benzonatate (PF‑00345410) mg/kg/day 0 10 30 90 0 5 15 50

‑‑‑‑‑‑‑‑‑‑‑‑‑‑‑‑‑‑‑‑‑‑‑‑‑‑‑‑‑‑‑‑‑‑‑‑‑‑‑‑‑‑‑‑‑‑‑‑‑‑‑‑‑‑‑‑‑‑‑‑‑‑‑‑‑‑‑‑‑‑‑‑‑‑‑‑‑‑‑‑‑‑‑‑‑‑‑‑‑‑‑‑‑‑‑‑‑‑‑‑‑‑‑‑‑‑‑‑

Tissue/ Group/Subgroup/Sex: 1/1/M 2/1/M 3/1/M 4/1/M 1/1/F 2/1/F 3/1/F 4/1/F

Observation Number of Animals:  33  24  31  28  25  23  24  30

‑‑‑‑‑‑‑‑‑‑‑‑‑‑‑‑‑‑‑‑‑‑‑‑‑‑‑‑‑‑‑‑‑‑‑‑‑‑‑‑‑‑‑‑‑‑‑‑‑‑‑‑‑‑‑‑‑‑‑‑‑‑‑‑‑‑‑‑‑‑‑‑‑‑‑‑‑‑‑‑‑‑‑‑‑‑‑‑‑‑‑‑‑‑‑‑‑‑‑‑‑‑‑‑‑‑‑‑

Lymph Node, Other Number Examined:   1   1   1   0   0   0   0   0

Unremarkable:   0   0   0   0   0   0   0   0

Dilatation, sinus

finding not present ‑   0   1   1   0   0   0   0   0

moderate 3   1   0   0   0   0   0   0   0

Total Incidence:   1   0   0   0   0   0   0   0

Average Severity:   3.0   0.0   0.0   0.0   0.0   0.0   0.0   0.0

Hyperplasia, lymphocytes

finding not present ‑   1   1   0   0   0   0   0   0

moderate 3   0   0   1   0   0   0   0   0

Total Incidence:   0   0   1   0   0   0   0   0

Average Severity:   0.0   0.0   3.0   0.0   0.0   0.0   0.0   0.0

‑‑‑‑‑‑‑‑‑‑‑‑‑‑‑‑‑‑‑‑‑‑‑‑‑‑‑‑‑‑‑‑‑‑‑‑‑‑‑‑‑‑‑‑‑‑‑‑‑‑‑‑‑‑‑‑‑‑‑‑‑‑‑‑‑‑‑‑‑‑‑‑‑‑‑‑‑‑‑‑‑‑‑‑‑‑‑‑‑‑‑‑‑‑‑‑‑‑‑‑‑‑‑‑‑‑‑

Table

Summary of Severity for Selected Microscopic Observations

Terminal Euthanasia (Dosing Phase)

Test Article (dosage) 1M 2M 3M 4M 1F 2F 3F 4F

‑‑‑‑‑‑‑‑‑‑‑‑‑‑‑‑‑‑‑‑‑‑‑‑‑‑‑ ‑‑‑‑‑‑‑‑ ‑‑ ‑‑ ‑‑ ‑‑ ‑‑ ‑‑ ‑‑ ‑‑

Benzonatate (PF‑00345410) mg/kg/day 0 10 30 90 0 5 15 50

‑‑‑‑‑‑‑‑‑‑‑‑‑‑‑‑‑‑‑‑‑‑‑‑‑‑‑‑‑‑‑‑‑‑‑‑‑‑‑‑‑‑‑‑‑‑‑‑‑‑‑‑‑‑‑‑‑‑‑‑‑‑‑‑‑‑‑‑‑‑‑‑‑‑‑‑‑‑‑‑‑‑‑‑‑‑‑‑‑‑‑‑‑‑‑‑‑‑‑‑‑‑‑‑‑‑‑‑

Tissue/ Group/Subgroup/Sex: 1/1/M 2/1/M 3/1/M 4/1/M 1/1/F 2/1/F 3/1/F 4/1/F

Observation Number of Animals:  33  24  31  28  25  23  24  30

‑‑‑‑‑‑‑‑‑‑‑‑‑‑‑‑‑‑‑‑‑‑‑‑‑‑‑‑‑‑‑‑‑‑‑‑‑‑‑‑‑‑‑‑‑‑‑‑‑‑‑‑‑‑‑‑‑‑‑‑‑‑‑‑‑‑‑‑‑‑‑‑‑‑‑‑‑‑‑‑‑‑‑‑‑‑‑‑‑‑‑‑‑‑‑‑‑‑‑‑‑‑‑‑‑‑‑‑

Mammary Gland Number Examined:  30  17  23  19  25  23  23  30

Unremarkable:  24  17  21  15   5   3   8   3

Cyst/ectasia with inflammation

finding not present ‑  24  17  21  15  10   5  12   9

minimal 1   4   0   1   2   7   8   4   7

slight 2   2   0   1   2   6   6   4   9

moderate 3   0   0   0   0   1   3   2   3

marked 4   0   0   0   0   1   1   1   2

Total Incidence:   6   0   2   4  15  18  11  21

Average Severity:   1.3   0.0   1.5   1.5   1.7   1.8   2.0   2.0

Hyperplasia

finding not present ‑  30  17  23  19   9   6  12  12

minimal 1   0   0   0   0   4   6   2   4

slight 2   0   0   0   0  10   6   7   9

moderate 3   0   0   0   0   2   5   2   4

marked 4   0   0   0   0   0   0   0   1

Total Incidence:   0   0   0   0  16  17  11  18

Average Severity:   0.0   0.0   0.0   0.0   1.9   1.9   2.0   2.1

Mandibular

Salivary Gland Number Examined: 33 24 31 28 25 23 24 30

Unremarkable: 33 24 31 28 25 22 24 30

‑‑‑‑‑‑‑‑‑‑‑‑‑‑‑‑‑‑‑‑‑‑‑‑‑‑‑‑‑‑‑‑‑‑‑‑‑‑‑‑‑‑‑‑‑‑‑‑‑‑‑‑‑‑‑‑‑‑‑‑‑‑‑‑‑‑‑‑‑‑‑‑‑‑‑‑‑‑‑‑‑‑‑‑‑‑‑‑‑‑‑‑‑‑‑‑‑‑‑‑‑‑‑‑‑‑‑

Table

Summary of Severity for Selected Microscopic Observations

Terminal Euthanasia (Dosing Phase)

Test Article (dosage) 1M 2M 3M 4M 1F 2F 3F 4F

‑‑‑‑‑‑‑‑‑‑‑‑‑‑‑‑‑‑‑‑‑‑‑‑‑‑‑ ‑‑‑‑‑‑‑‑ ‑‑ ‑‑ ‑‑ ‑‑ ‑‑ ‑‑ ‑‑ ‑‑

Benzonatate (PF‑00345410) mg/kg/day 0 10 30 90 0 5 15 50

‑‑‑‑‑‑‑‑‑‑‑‑‑‑‑‑‑‑‑‑‑‑‑‑‑‑‑‑‑‑‑‑‑‑‑‑‑‑‑‑‑‑‑‑‑‑‑‑‑‑‑‑‑‑‑‑‑‑‑‑‑‑‑‑‑‑‑‑‑‑‑‑‑‑‑‑‑‑‑‑‑‑‑‑‑‑‑‑‑‑‑‑‑‑‑‑‑‑‑‑‑‑‑‑‑‑‑‑

Tissue/ Group/Subgroup/Sex: 1/1/M 2/1/M 3/1/M 4/1/M 1/1/F 2/1/F 3/1/F 4/1/F

Observation Number of Animals:  33  24  31  28  25  23  24  30

‑‑‑‑‑‑‑‑‑‑‑‑‑‑‑‑‑‑‑‑‑‑‑‑‑‑‑‑‑‑‑‑‑‑‑‑‑‑‑‑‑‑‑‑‑‑‑‑‑‑‑‑‑‑‑‑‑‑‑‑‑‑‑‑‑‑‑‑‑‑‑‑‑‑‑‑‑‑‑‑‑‑‑‑‑‑‑‑‑‑‑‑‑‑‑‑‑‑‑‑‑‑‑‑‑‑‑‑

Marrow, Sternum Number Examined:  33  24  31  28  25  23  24  30

Unremarkable:  28  23  31  28  25  23  24  28

Hyperplasia, myeloid

finding not present ‑  28  23  31  28  25  23  24  29

minimal 1   2   0   0   0   0   0   0   0

slight 2   3   1   0   0   0   0   0   1

Total Incidence:   5   1   0   0   0   0   0   1

Average Severity:   1.6   2.0   0.0   0.0   0.0   0.0   0.0   2.0

Mesentery Number Examined:   0   0   0   0   1   0   0   1

Unremarkable:   0   0   0   0   0   0   0   0

Inflammation

finding not present ‑   0   0   0   0   0   0   0   1

slight 2   0   0   0   0   1   0   0   0

Total Incidence:   0   0   0   0   1   0   0   0

Average Severity:   0.0   0.0   0.0   0.0   2.0   0.0   0.0   0.0

Necrosis

finding not present ‑   0   0   0   0   0   0   0   1

moderate 3   0   0   0   0   1   0   0   0

Total Incidence:   0   0   0   0   1   0   0   0

Average Severity:   0.0   0.0   0.0   0.0   3.0   0.0   0.0   0.0

‑‑‑‑‑‑‑‑‑‑‑‑‑‑‑‑‑‑‑‑‑‑‑‑‑‑‑‑‑‑‑‑‑‑‑‑‑‑‑‑‑‑‑‑‑‑‑‑‑‑‑‑‑‑‑‑‑‑‑‑‑‑‑‑‑‑‑‑‑‑‑‑‑‑‑‑‑‑‑‑‑‑‑‑‑‑‑‑‑‑‑‑‑‑‑‑‑‑‑‑‑‑‑‑‑‑‑

Table

Summary of Severity for Selected Microscopic Observations

Terminal Euthanasia (Dosing Phase)

Test Article (dosage) 1M 2M 3M 4M 1F 2F 3F 4F

‑‑‑‑‑‑‑‑‑‑‑‑‑‑‑‑‑‑‑‑‑‑‑‑‑‑‑ ‑‑‑‑‑‑‑‑ ‑‑ ‑‑ ‑‑ ‑‑ ‑‑ ‑‑ ‑‑ ‑‑

Benzonatate (PF‑00345410) mg/kg/day 0 10 30 90 0 5 15 50

‑‑‑‑‑‑‑‑‑‑‑‑‑‑‑‑‑‑‑‑‑‑‑‑‑‑‑‑‑‑‑‑‑‑‑‑‑‑‑‑‑‑‑‑‑‑‑‑‑‑‑‑‑‑‑‑‑‑‑‑‑‑‑‑‑‑‑‑‑‑‑‑‑‑‑‑‑‑‑‑‑‑‑‑‑‑‑‑‑‑‑‑‑‑‑‑‑‑‑‑‑‑‑‑‑‑‑‑

Tissue/ Group/Subgroup/Sex: 1/1/M 2/1/M 3/1/M 4/1/M 1/1/F 2/1/F 3/1/F 4/1/F

Observation Number of Animals:  33  24  31  28  25  23  24  30

‑‑‑‑‑‑‑‑‑‑‑‑‑‑‑‑‑‑‑‑‑‑‑‑‑‑‑‑‑‑‑‑‑‑‑‑‑‑‑‑‑‑‑‑‑‑‑‑‑‑‑‑‑‑‑‑‑‑‑‑‑‑‑‑‑‑‑‑‑‑‑‑‑‑‑‑‑‑‑‑‑‑‑‑‑‑‑‑‑‑‑‑‑‑‑‑‑‑‑‑‑‑‑‑‑‑‑‑

Muscle, Biceps

Femoris Number Examined: 33 24 31 28 25 23 24 30

Unremarkable: 16 5 2 6 7 15 20 11

Degeneration/regeneration

finding not present ‑  16   5   2   6   7  15  20  11

minimal 1  13  19  17  16  16   8   4  18

slight 2   4   0  10   6   2   0   0   1

moderate 3   0   0   1   0   0   0   0   0

marked 4   0   0   1   0   0   0   0   0

Total Incidence:  17  19  29  22  18   8   4  19

Average Severity:   1.2   1.0   1.5   1.3   1.1   1.0   1.0   1.1

Nasal Turbinate Number Examined:  33  24  31  28  25  23  24  30

Unremarkable:  33  24  31  28  25  23  24  30

‑‑‑‑‑‑‑‑‑‑‑‑‑‑‑‑‑‑‑‑‑‑‑‑‑‑‑‑‑‑‑‑‑‑‑‑‑‑‑‑‑‑‑‑‑‑‑‑‑‑‑‑‑‑‑‑‑‑‑‑‑‑‑‑‑‑‑‑‑‑‑‑‑‑‑‑‑‑‑‑‑‑‑‑‑‑‑‑‑‑‑‑‑‑‑‑‑‑‑‑‑‑‑‑‑‑‑

Table

Summary of Severity for Selected Microscopic Observations

Terminal Euthanasia (Dosing Phase)

Test Article (dosage) 1M 2M 3M 4M 1F 2F 3F 4F

‑‑‑‑‑‑‑‑‑‑‑‑‑‑‑‑‑‑‑‑‑‑‑‑‑‑‑ ‑‑‑‑‑‑‑‑ ‑‑ ‑‑ ‑‑ ‑‑ ‑‑ ‑‑ ‑‑ ‑‑

Benzonatate (PF‑00345410) mg/kg/day 0 10 30 90 0 5 15 50

‑‑‑‑‑‑‑‑‑‑‑‑‑‑‑‑‑‑‑‑‑‑‑‑‑‑‑‑‑‑‑‑‑‑‑‑‑‑‑‑‑‑‑‑‑‑‑‑‑‑‑‑‑‑‑‑‑‑‑‑‑‑‑‑‑‑‑‑‑‑‑‑‑‑‑‑‑‑‑‑‑‑‑‑‑‑‑‑‑‑‑‑‑‑‑‑‑‑‑‑‑‑‑‑‑‑‑‑

Tissue/ Group/Subgroup/Sex: 1/1/M 2/1/M 3/1/M 4/1/M 1/1/F 2/1/F 3/1/F 4/1/F

Observation Number of Animals:  33  24  31  28  25  23  24  30

‑‑‑‑‑‑‑‑‑‑‑‑‑‑‑‑‑‑‑‑‑‑‑‑‑‑‑‑‑‑‑‑‑‑‑‑‑‑‑‑‑‑‑‑‑‑‑‑‑‑‑‑‑‑‑‑‑‑‑‑‑‑‑‑‑‑‑‑‑‑‑‑‑‑‑‑‑‑‑‑‑‑‑‑‑‑‑‑‑‑‑‑‑‑‑‑‑‑‑‑‑‑‑‑‑‑‑‑

Nerve, Optic Number Examined:  33  24  31  28  25  23  24  30

Unremarkable:  33  24  31  27  24  23  23  30

Atrophy

finding not present ‑  33  24  31  28  24  23  23  30

slight 2   0   0   0   0   1   0   1   0

Total Incidence:   0   0   0   0   1   0   1   0

Average Severity:   0.0   0.0   0.0   0.0   2.0   0.0   2.0   0.0

Degeneration, axon

finding not present ‑  33  24  31  27  25  23  24  30

slight 2   0   0   0   1   0   0   0   0

Total Incidence:   0   0   0   1   0   0   0   0

Average Severity:   0.0   0.0   0.0   2.0   0.0   0.0   0.0   0.0

Nerve, Sciatic Number Examined:  33  24  31  28  25  23  24  30

Unremarkable:  33  24  30  28  14  22  20  23

Degeneration, axon, increased

finding not present ‑  33  24  30  28  14  22  20  23

minimal 1   0   0   0   0  10   1   4   7

slight 2   0   0   1   0   1   0   0   0

Total Incidence:   0   0   1   0  11   1   4   7

Average Severity:   0.0   0.0   2.0   0.0   1.1   1.0   1.0   1.0

‑‑‑‑‑‑‑‑‑‑‑‑‑‑‑‑‑‑‑‑‑‑‑‑‑‑‑‑‑‑‑‑‑‑‑‑‑‑‑‑‑‑‑‑‑‑‑‑‑‑‑‑‑‑‑‑‑‑‑‑‑‑‑‑‑‑‑‑‑‑‑‑‑‑‑‑‑‑‑‑‑‑‑‑‑‑‑‑‑‑‑‑‑‑‑‑‑‑‑‑‑‑‑‑‑‑‑

Table

Summary of Severity for Selected Microscopic Observations

Terminal Euthanasia (Dosing Phase)

Test Article (dosage) 1M 2M 3M 4M 1F 2F 3F 4F

‑‑‑‑‑‑‑‑‑‑‑‑‑‑‑‑‑‑‑‑‑‑‑‑‑‑‑ ‑‑‑‑‑‑‑‑ ‑‑ ‑‑ ‑‑ ‑‑ ‑‑ ‑‑ ‑‑ ‑‑

Benzonatate (PF‑00345410) mg/kg/day 0 10 30 90 0 5 15 50

‑‑‑‑‑‑‑‑‑‑‑‑‑‑‑‑‑‑‑‑‑‑‑‑‑‑‑‑‑‑‑‑‑‑‑‑‑‑‑‑‑‑‑‑‑‑‑‑‑‑‑‑‑‑‑‑‑‑‑‑‑‑‑‑‑‑‑‑‑‑‑‑‑‑‑‑‑‑‑‑‑‑‑‑‑‑‑‑‑‑‑‑‑‑‑‑‑‑‑‑‑‑‑‑‑‑‑‑

Tissue/ Group/Subgroup/Sex: 1/1/M 2/1/M 3/1/M 4/1/M 1/1/F 2/1/F 3/1/F 4/1/F

Observation Number of Animals:  33  24  31  28  25  23  24  30

‑‑‑‑‑‑‑‑‑‑‑‑‑‑‑‑‑‑‑‑‑‑‑‑‑‑‑‑‑‑‑‑‑‑‑‑‑‑‑‑‑‑‑‑‑‑‑‑‑‑‑‑‑‑‑‑‑‑‑‑‑‑‑‑‑‑‑‑‑‑‑‑‑‑‑‑‑‑‑‑‑‑‑‑‑‑‑‑‑‑‑‑‑‑‑‑‑‑‑‑‑‑‑‑‑‑‑‑

Ovary Number Examined:   0   0   0   0  25  23  24  29

Unremarkable:   0   0   0   0  13   8   7  12

Cyst, bursa

finding not present ‑   0   0   0   0  24  22  23  26

slight 2   0   0   0   0   1   1   0   2

moderate 3   0   0   0   0   0   0   1   1

Total Incidence:   0   0   0   0   1   1   1   3

Average Severity:   0.0   0.0   0.0   0.0   2.0   2.0   3.0   2.3

Cyst, corpus luteum

finding not present ‑   0   0   0   0  25  23  23  28

slight 2   0   0   0   0   0   0   1   1

Total Incidence:   0   0   0   0   0   0   1   1

Average Severity:   0.0   0.0   0.0   0.0   0.0   0.0   2.0   2.0

Cyst, follicle

finding not present ‑   0   0   0   0  25  22  19  29

minimal 1   0   0   0   0   0   1   1   0

slight 2   0   0   0   0   0   0   4   0

Total Incidence:   0   0   0   0   0   1   5   0

Average Severity:   0.0   0.0   0.0   0.0   0.0   1.0   1.8   0.0

‑‑‑‑‑‑‑‑‑‑‑‑‑‑‑‑‑‑‑‑‑‑‑‑‑‑‑‑‑‑‑‑‑‑‑‑‑‑‑‑‑‑‑‑‑‑‑‑‑‑‑‑‑‑‑‑‑‑‑‑‑‑‑‑‑‑‑‑‑‑‑‑‑‑‑‑‑‑‑‑‑‑‑‑‑‑‑‑‑‑‑‑‑‑‑‑‑‑‑‑‑‑‑‑‑‑‑

Table

Summary of Severity for Selected Microscopic Observations

Terminal Euthanasia (Dosing Phase)

Test Article (dosage) 1M 2M 3M 4M 1F 2F 3F 4F

‑‑‑‑‑‑‑‑‑‑‑‑‑‑‑‑‑‑‑‑‑‑‑‑‑‑‑ ‑‑‑‑‑‑‑‑ ‑‑ ‑‑ ‑‑ ‑‑ ‑‑ ‑‑ ‑‑ ‑‑

Benzonatate (PF‑00345410) mg/kg/day 0 10 30 90 0 5 15 50

‑‑‑‑‑‑‑‑‑‑‑‑‑‑‑‑‑‑‑‑‑‑‑‑‑‑‑‑‑‑‑‑‑‑‑‑‑‑‑‑‑‑‑‑‑‑‑‑‑‑‑‑‑‑‑‑‑‑‑‑‑‑‑‑‑‑‑‑‑‑‑‑‑‑‑‑‑‑‑‑‑‑‑‑‑‑‑‑‑‑‑‑‑‑‑‑‑‑‑‑‑‑‑‑‑‑‑‑

Tissue/ Group/Subgroup/Sex: 1/1/M 2/1/M 3/1/M 4/1/M 1/1/F 2/1/F 3/1/F 4/1/F

Observation Number of Animals:  33  24  31  28  25  23  24  30

‑‑‑‑‑‑‑‑‑‑‑‑‑‑‑‑‑‑‑‑‑‑‑‑‑‑‑‑‑‑‑‑‑‑‑‑‑‑‑‑‑‑‑‑‑‑‑‑‑‑‑‑‑‑‑‑‑‑‑‑‑‑‑‑‑‑‑‑‑‑‑‑‑‑‑‑‑‑‑‑‑‑‑‑‑‑‑‑‑‑‑‑‑‑‑‑‑‑‑‑‑‑‑‑‑‑‑‑

Ovary Number Examined:   0   0   0   0  25  23  24  29

Unremarkable:   0   0   0   0  13   8   7  12

Cyst, parovarian

finding not present ‑   0   0   0   0  19  20  22  23

slight 2   0   0   0   0   4   1   2   4

moderate 3   0   0   0   0   1   2   0   2

marked 4   0   0   0   0   1   0   0   0

Total Incidence:   0   0   0   0   6   3   2   6

Average Severity:   0.0   0.0   0.0   0.0   2.5   2.7   2.0   2.3

Hyperplasia, interstitial cell

finding not present ‑   0   0   0   0  18  11  13  22

minimal 1   0   0   0   0   0   2   3   0

slight 2   0   0   0   0   4   8   7   6

moderate 3   0   0   0   0   3   2   1   1

Total Incidence:   0   0   0   0   7  12  11   7

Average Severity:   0.0   0.0   0.0   0.0   2.4   2.0   1.8   2.1

Oviduct Number Examined:   0   0   0   0  25  23  24  30

Unremarkable:   0   0   0   0  25  23  24  30

‑‑‑‑‑‑‑‑‑‑‑‑‑‑‑‑‑‑‑‑‑‑‑‑‑‑‑‑‑‑‑‑‑‑‑‑‑‑‑‑‑‑‑‑‑‑‑‑‑‑‑‑‑‑‑‑‑‑‑‑‑‑‑‑‑‑‑‑‑‑‑‑‑‑‑‑‑‑‑‑‑‑‑‑‑‑‑‑‑‑‑‑‑‑‑‑‑‑‑‑‑‑‑‑‑‑‑

Table

Summary of Severity for Selected Microscopic Observations

Terminal Euthanasia (Dosing Phase)

Test Article (dosage) 1M 2M 3M 4M 1F 2F 3F 4F

‑‑‑‑‑‑‑‑‑‑‑‑‑‑‑‑‑‑‑‑‑‑‑‑‑‑‑ ‑‑‑‑‑‑‑‑ ‑‑ ‑‑ ‑‑ ‑‑ ‑‑ ‑‑ ‑‑ ‑‑

Benzonatate (PF‑00345410) mg/kg/day 0 10 30 90 0 5 15 50

‑‑‑‑‑‑‑‑‑‑‑‑‑‑‑‑‑‑‑‑‑‑‑‑‑‑‑‑‑‑‑‑‑‑‑‑‑‑‑‑‑‑‑‑‑‑‑‑‑‑‑‑‑‑‑‑‑‑‑‑‑‑‑‑‑‑‑‑‑‑‑‑‑‑‑‑‑‑‑‑‑‑‑‑‑‑‑‑‑‑‑‑‑‑‑‑‑‑‑‑‑‑‑‑‑‑‑‑

Tissue/ Group/Subgroup/Sex: 1/1/M 2/1/M 3/1/M 4/1/M 1/1/F 2/1/F 3/1/F 4/1/F

Observation Number of Animals:  33  24  31  28  25  23  24  30

‑‑‑‑‑‑‑‑‑‑‑‑‑‑‑‑‑‑‑‑‑‑‑‑‑‑‑‑‑‑‑‑‑‑‑‑‑‑‑‑‑‑‑‑‑‑‑‑‑‑‑‑‑‑‑‑‑‑‑‑‑‑‑‑‑‑‑‑‑‑‑‑‑‑‑‑‑‑‑‑‑‑‑‑‑‑‑‑‑‑‑‑‑‑‑‑‑‑‑‑‑‑‑‑‑‑‑‑

Pancreas Number Examined:  33  24  31  28  25  23  24  30

Unremarkable:   5   5   3   0  13  14  20  15

Alteration, basophilic

finding not present ‑  32  22  31  23  24  23  24  29

minimal 1   0   2   0   4   0   0   0   1

slight 2   1   0   0   1   1   0   0   0

Total Incidence:   1   2   0   5   1   0   0   1

Average Severity:   2.0   1.0   0.0   1.2   2.0   0.0   0.0   1.0

Atrophy, acinar

finding not present ‑  31  20  27  22  23  20  24  27

minimal 1   1   2   2   2   1   0   0   0

slight 2   1   2   2   3   1   0   0   3

moderate 3   0   0   0   1   0   3   0   0

Total Incidence:   2   4   4   6   2   3   0   3

Average Severity:   1.5   1.5   1.5   1.8   1.5   3.0   0.0   2.0

Depletion, zymogen

finding not present ‑  33  24  29  28  25  23  24  29

slight 2   0   0   1   0   0   0   0   1

moderate 3   0   0   1   0   0   0   0   0

Total Incidence:   0   0   2   0   0   0   0   1

Average Severity:   0.0   0.0   2.5   0.0   0.0   0.0   0.0   2.0

‑‑‑‑‑‑‑‑‑‑‑‑‑‑‑‑‑‑‑‑‑‑‑‑‑‑‑‑‑‑‑‑‑‑‑‑‑‑‑‑‑‑‑‑‑‑‑‑‑‑‑‑‑‑‑‑‑‑‑‑‑‑‑‑‑‑‑‑‑‑‑‑‑‑‑‑‑‑‑‑‑‑‑‑‑‑‑‑‑‑‑‑‑‑‑‑‑‑‑‑‑‑‑‑‑‑‑

Table

Summary of Severity for Selected Microscopic Observations

Terminal Euthanasia (Dosing Phase)

Test Article (dosage) 1M 2M 3M 4M 1F 2F 3F 4F

‑‑‑‑‑‑‑‑‑‑‑‑‑‑‑‑‑‑‑‑‑‑‑‑‑‑‑ ‑‑‑‑‑‑‑‑ ‑‑ ‑‑ ‑‑ ‑‑ ‑‑ ‑‑ ‑‑ ‑‑

Benzonatate (PF‑00345410) mg/kg/day 0 10 30 90 0 5 15 50

‑‑‑‑‑‑‑‑‑‑‑‑‑‑‑‑‑‑‑‑‑‑‑‑‑‑‑‑‑‑‑‑‑‑‑‑‑‑‑‑‑‑‑‑‑‑‑‑‑‑‑‑‑‑‑‑‑‑‑‑‑‑‑‑‑‑‑‑‑‑‑‑‑‑‑‑‑‑‑‑‑‑‑‑‑‑‑‑‑‑‑‑‑‑‑‑‑‑‑‑‑‑‑‑‑‑‑‑

Tissue/ Group/Subgroup/Sex: 1/1/M 2/1/M 3/1/M 4/1/M 1/1/F 2/1/F 3/1/F 4/1/F

Observation Number of Animals:  33  24  31  28  25  23  24  30

‑‑‑‑‑‑‑‑‑‑‑‑‑‑‑‑‑‑‑‑‑‑‑‑‑‑‑‑‑‑‑‑‑‑‑‑‑‑‑‑‑‑‑‑‑‑‑‑‑‑‑‑‑‑‑‑‑‑‑‑‑‑‑‑‑‑‑‑‑‑‑‑‑‑‑‑‑‑‑‑‑‑‑‑‑‑‑‑‑‑‑‑‑‑‑‑‑‑‑‑‑‑‑‑‑‑‑‑

Pancreas Number Examined:  33  24  31  28  25  23  24  30

Unremarkable:   5   5   3   0  13  14  20  15

Ectopic spleen

finding not present ‑  33  24  31  28  25  23  24  29

Present   0   0   0   0   0   0   0   1

Hyperplasia, islet cell

finding not present ‑   7   5   5   1  17  15  24  21

minimal 1   6   6   7   5   5   2   0   4

slight 2  17   9  14  18   2   4   0   5

moderate 3   2   4   4   3   1   1   0   0

marked 4   1   0   1   1   0   1   0   0

Total Incidence:  26  19  26  27   8   8   0   9

Average Severity:   1.9   1.9   2.0   2.0   1.5   2.1   0.0   1.6

Infiltrate, mononuclear cell

finding not present ‑  32  19  21  24  23  22  22  25

minimal 1   1   4   9   3   2   1   2   4

slight 2   0   1   1   1   0   0   0   1

Total Incidence:   1   5  10   4   2   1   2   5

Average Severity:   1.0   1.2   1.1   1.3   1.0   1.0   1.0   1.2

‑‑‑‑‑‑‑‑‑‑‑‑‑‑‑‑‑‑‑‑‑‑‑‑‑‑‑‑‑‑‑‑‑‑‑‑‑‑‑‑‑‑‑‑‑‑‑‑‑‑‑‑‑‑‑‑‑‑‑‑‑‑‑‑‑‑‑‑‑‑‑‑‑‑‑‑‑‑‑‑‑‑‑‑‑‑‑‑‑‑‑‑‑‑‑‑‑‑‑‑‑‑‑‑‑‑‑

Table

Summary of Severity for Selected Microscopic Observations

Terminal Euthanasia (Dosing Phase)

Test Article (dosage) 1M 2M 3M 4M 1F 2F 3F 4F

‑‑‑‑‑‑‑‑‑‑‑‑‑‑‑‑‑‑‑‑‑‑‑‑‑‑‑ ‑‑‑‑‑‑‑‑ ‑‑ ‑‑ ‑‑ ‑‑ ‑‑ ‑‑ ‑‑ ‑‑

Benzonatate (PF‑00345410) mg/kg/day 0 10 30 90 0 5 15 50

‑‑‑‑‑‑‑‑‑‑‑‑‑‑‑‑‑‑‑‑‑‑‑‑‑‑‑‑‑‑‑‑‑‑‑‑‑‑‑‑‑‑‑‑‑‑‑‑‑‑‑‑‑‑‑‑‑‑‑‑‑‑‑‑‑‑‑‑‑‑‑‑‑‑‑‑‑‑‑‑‑‑‑‑‑‑‑‑‑‑‑‑‑‑‑‑‑‑‑‑‑‑‑‑‑‑‑‑

Tissue/ Group/Subgroup/Sex: 1/1/M 2/1/M 3/1/M 4/1/M 1/1/F 2/1/F 3/1/F 4/1/F

Observation Number of Animals:  33  24  31  28  25  23  24  30

‑‑‑‑‑‑‑‑‑‑‑‑‑‑‑‑‑‑‑‑‑‑‑‑‑‑‑‑‑‑‑‑‑‑‑‑‑‑‑‑‑‑‑‑‑‑‑‑‑‑‑‑‑‑‑‑‑‑‑‑‑‑‑‑‑‑‑‑‑‑‑‑‑‑‑‑‑‑‑‑‑‑‑‑‑‑‑‑‑‑‑‑‑‑‑‑‑‑‑‑‑‑‑‑‑‑‑‑

Pancreas Number Examined:  33  24  31  28  25  23  24  30

Unremarkable:   5   5   3   0  13  14  20  15

Inflammation, acute

finding not present ‑  33  24  31  27  25  23  24  30

minimal 1   0   0   0   1   0   0   0   0

Total Incidence:   0   0   0   1   0   0   0   0

Average Severity:   0.0   0.0   0.0   1.0   0.0   0.0   0.0   0.0

Inflammation, chronic

finding not present ‑  29  24  28  26  24  23  24  30

slight 2   4   0   3   2   1   0   0   0

Total Incidence:   4   0   3   2   1   0   0   0

Average Severity:   2.0   0.0   2.0   2.0   2.0   0.0   0.0   0.0

Inflammation, vessel

finding not present ‑  33  24  30  28  25  23  23  30

slight 2   0   0   1   0   0   0   0   0

marked 4   0   0   0   0   0   0   1   0

Total Incidence:   0   0   1   0   0   0   1   0

Average Severity:   0.0   0.0   2.0   0.0   0.0   0.0   4.0   0.0

‑‑‑‑‑‑‑‑‑‑‑‑‑‑‑‑‑‑‑‑‑‑‑‑‑‑‑‑‑‑‑‑‑‑‑‑‑‑‑‑‑‑‑‑‑‑‑‑‑‑‑‑‑‑‑‑‑‑‑‑‑‑‑‑‑‑‑‑‑‑‑‑‑‑‑‑‑‑‑‑‑‑‑‑‑‑‑‑‑‑‑‑‑‑‑‑‑‑‑‑‑‑‑‑‑‑‑

Table

Summary of Severity for Selected Microscopic Observations

Terminal Euthanasia (Dosing Phase)

Test Article (dosage) 1M 2M 3M 4M 1F 2F 3F 4F

‑‑‑‑‑‑‑‑‑‑‑‑‑‑‑‑‑‑‑‑‑‑‑‑‑‑‑ ‑‑‑‑‑‑‑‑ ‑‑ ‑‑ ‑‑ ‑‑ ‑‑ ‑‑ ‑‑ ‑‑

Benzonatate (PF‑00345410) mg/kg/day 0 10 30 90 0 5 15 50

‑‑‑‑‑‑‑‑‑‑‑‑‑‑‑‑‑‑‑‑‑‑‑‑‑‑‑‑‑‑‑‑‑‑‑‑‑‑‑‑‑‑‑‑‑‑‑‑‑‑‑‑‑‑‑‑‑‑‑‑‑‑‑‑‑‑‑‑‑‑‑‑‑‑‑‑‑‑‑‑‑‑‑‑‑‑‑‑‑‑‑‑‑‑‑‑‑‑‑‑‑‑‑‑‑‑‑‑

Tissue/ Group/Subgroup/Sex: 1/1/M 2/1/M 3/1/M 4/1/M 1/1/F 2/1/F 3/1/F 4/1/F

Observation Number of Animals:  33  24  31  28  25  23  24  30

‑‑‑‑‑‑‑‑‑‑‑‑‑‑‑‑‑‑‑‑‑‑‑‑‑‑‑‑‑‑‑‑‑‑‑‑‑‑‑‑‑‑‑‑‑‑‑‑‑‑‑‑‑‑‑‑‑‑‑‑‑‑‑‑‑‑‑‑‑‑‑‑‑‑‑‑‑‑‑‑‑‑‑‑‑‑‑‑‑‑‑‑‑‑‑‑‑‑‑‑‑‑‑‑‑‑‑‑

Pancreas Number Examined:  33  24  31  28  25  23  24  30

Unremarkable:   5   5   3   0  13  14  20  15

Thrombus

finding not present ‑  33  24  31  28  25  23  23  30

marked 4   0   0   0   0   0   0   1   0

Total Incidence:   0   0   0   0   0   0   1   0

Average Severity:   0.0   0.0   0.0   0.0   0.0   0.0   4.0   0.0

Parathyroid Number Examined:  33  22  30  28  25  23  24  29

Unremarkable:  30  19  28  25  25  22  24  29

Hyperplasia

finding not present ‑  30  20  29  26  25  23  24  29

minimal 1   1   0   0   0   0   0   0   0

slight 2   1   1   0   2   0   0   0   0

moderate 3   1   1   1   0   0   0   0   0

Total Incidence:   3   2   1   2   0   0   0   0

Average Severity:   2.0   2.5   3.0   2.0   0.0   0.0   0.0   0.0

‑‑‑‑‑‑‑‑‑‑‑‑‑‑‑‑‑‑‑‑‑‑‑‑‑‑‑‑‑‑‑‑‑‑‑‑‑‑‑‑‑‑‑‑‑‑‑‑‑‑‑‑‑‑‑‑‑‑‑‑‑‑‑‑‑‑‑‑‑‑‑‑‑‑‑‑‑‑‑‑‑‑‑‑‑‑‑‑‑‑‑‑‑‑‑‑‑‑‑‑‑‑‑‑‑‑‑

Table

Summary of Severity for Selected Microscopic Observations

Terminal Euthanasia (Dosing Phase)

Test Article (dosage) 1M 2M 3M 4M 1F 2F 3F 4F

‑‑‑‑‑‑‑‑‑‑‑‑‑‑‑‑‑‑‑‑‑‑‑‑‑‑‑ ‑‑‑‑‑‑‑‑ ‑‑ ‑‑ ‑‑ ‑‑ ‑‑ ‑‑ ‑‑ ‑‑

Benzonatate (PF‑00345410) mg/kg/day 0 10 30 90 0 5 15 50

‑‑‑‑‑‑‑‑‑‑‑‑‑‑‑‑‑‑‑‑‑‑‑‑‑‑‑‑‑‑‑‑‑‑‑‑‑‑‑‑‑‑‑‑‑‑‑‑‑‑‑‑‑‑‑‑‑‑‑‑‑‑‑‑‑‑‑‑‑‑‑‑‑‑‑‑‑‑‑‑‑‑‑‑‑‑‑‑‑‑‑‑‑‑‑‑‑‑‑‑‑‑‑‑‑‑‑‑

Tissue/ Group/Subgroup/Sex: 1/1/M 2/1/M 3/1/M 4/1/M 1/1/F 2/1/F 3/1/F 4/1/F

Observation Number of Animals:  33  24  31  28  25  23  24  30

‑‑‑‑‑‑‑‑‑‑‑‑‑‑‑‑‑‑‑‑‑‑‑‑‑‑‑‑‑‑‑‑‑‑‑‑‑‑‑‑‑‑‑‑‑‑‑‑‑‑‑‑‑‑‑‑‑‑‑‑‑‑‑‑‑‑‑‑‑‑‑‑‑‑‑‑‑‑‑‑‑‑‑‑‑‑‑‑‑‑‑‑‑‑‑‑‑‑‑‑‑‑‑‑‑‑‑‑

Pituitary Number Examined:  33  24  31  28  25  23  24  30

Unremarkable:  10  10   9   9   3   2   5   2

Cyst, craniopharyngeal

finding not present ‑  31  23  31  28  25  23  24  30

slight 2   1   1   0   0   0   0   0   0

moderate 3   1   0   0   0   0   0   0   0

Total Incidence:   2   1   0   0   0   0   0   0

Average Severity:   2.5   2.0   0.0   0.0   0.0   0.0   0.0   0.0

Hyperplasia

finding not present ‑  23  15  20  20  21  20  22  25

minimal 1   0   1   0   0   0   0   0   0

slight 2   6   6   6   4   1   3   2   4

moderate 3   3   2   4   4   2   0   0   1

marked 4   1   0   1   0   1   0   0   0

Total Incidence:  10   9  11   8   4   3   2   5

Average Severity:   2.5   2.1   2.5   2.5   3.0   2.0   2.0   2.2

‑‑‑‑‑‑‑‑‑‑‑‑‑‑‑‑‑‑‑‑‑‑‑‑‑‑‑‑‑‑‑‑‑‑‑‑‑‑‑‑‑‑‑‑‑‑‑‑‑‑‑‑‑‑‑‑‑‑‑‑‑‑‑‑‑‑‑‑‑‑‑‑‑‑‑‑‑‑‑‑‑‑‑‑‑‑‑‑‑‑‑‑‑‑‑‑‑‑‑‑‑‑‑‑‑‑‑

Table

Summary of Severity for Selected Microscopic Observations

Terminal Euthanasia (Dosing Phase)

Test Article (dosage) 1M 2M 3M 4M 1F 2F 3F 4F

‑‑‑‑‑‑‑‑‑‑‑‑‑‑‑‑‑‑‑‑‑‑‑‑‑‑‑ ‑‑‑‑‑‑‑‑ ‑‑ ‑‑ ‑‑ ‑‑ ‑‑ ‑‑ ‑‑ ‑‑

Benzonatate (PF‑00345410) mg/kg/day 0 10 30 90 0 5 15 50

‑‑‑‑‑‑‑‑‑‑‑‑‑‑‑‑‑‑‑‑‑‑‑‑‑‑‑‑‑‑‑‑‑‑‑‑‑‑‑‑‑‑‑‑‑‑‑‑‑‑‑‑‑‑‑‑‑‑‑‑‑‑‑‑‑‑‑‑‑‑‑‑‑‑‑‑‑‑‑‑‑‑‑‑‑‑‑‑‑‑‑‑‑‑‑‑‑‑‑‑‑‑‑‑‑‑‑‑

Tissue/ Group/Subgroup/Sex: 1/1/M 2/1/M 3/1/M 4/1/M 1/1/F 2/1/F 3/1/F 4/1/F

Observation Number of Animals:  33  24  31  28  25  23  24  30

‑‑‑‑‑‑‑‑‑‑‑‑‑‑‑‑‑‑‑‑‑‑‑‑‑‑‑‑‑‑‑‑‑‑‑‑‑‑‑‑‑‑‑‑‑‑‑‑‑‑‑‑‑‑‑‑‑‑‑‑‑‑‑‑‑‑‑‑‑‑‑‑‑‑‑‑‑‑‑‑‑‑‑‑‑‑‑‑‑‑‑‑‑‑‑‑‑‑‑‑‑‑‑‑‑‑‑‑

Preputial Gland Number Examined:   1   1   0   0   0   0   0   0

Unremarkable:   0   0   0   0   0   0   0   0

Inflammation, chronic‑active

finding not present ‑   0   0   0   0   0   0   0   0

slight 2   0   1   0   0   0   0   0   0

moderate 3   1   0   0   0   0   0   0   0

Total Incidence:   1   1   0   0   0   0   0   0

Average Severity:   3.0   2.0   0.0   0.0   0.0   0.0   0.0   0.0

‑‑‑‑‑‑‑‑‑‑‑‑‑‑‑‑‑‑‑‑‑‑‑‑‑‑‑‑‑‑‑‑‑‑‑‑‑‑‑‑‑‑‑‑‑‑‑‑‑‑‑‑‑‑‑‑‑‑‑‑‑‑‑‑‑‑‑‑‑‑‑‑‑‑‑‑‑‑‑‑‑‑‑‑‑‑‑‑‑‑‑‑‑‑‑‑‑‑‑‑‑‑‑‑‑‑‑

Table

Summary of Severity for Selected Microscopic Observations

Terminal Euthanasia (Dosing Phase)

Test Article (dosage) 1M 2M 3M 4M 1F 2F 3F 4F

‑‑‑‑‑‑‑‑‑‑‑‑‑‑‑‑‑‑‑‑‑‑‑‑‑‑‑ ‑‑‑‑‑‑‑‑ ‑‑ ‑‑ ‑‑ ‑‑ ‑‑ ‑‑ ‑‑ ‑‑

Benzonatate (PF‑00345410) mg/kg/day 0 10 30 90 0 5 15 50

‑‑‑‑‑‑‑‑‑‑‑‑‑‑‑‑‑‑‑‑‑‑‑‑‑‑‑‑‑‑‑‑‑‑‑‑‑‑‑‑‑‑‑‑‑‑‑‑‑‑‑‑‑‑‑‑‑‑‑‑‑‑‑‑‑‑‑‑‑‑‑‑‑‑‑‑‑‑‑‑‑‑‑‑‑‑‑‑‑‑‑‑‑‑‑‑‑‑‑‑‑‑‑‑‑‑‑‑

Tissue/ Group/Subgroup/Sex: 1/1/M 2/1/M 3/1/M 4/1/M 1/1/F 2/1/F 3/1/F 4/1/F

Observation Number of Animals:  33  24  31  28  25  23  24  30

‑‑‑‑‑‑‑‑‑‑‑‑‑‑‑‑‑‑‑‑‑‑‑‑‑‑‑‑‑‑‑‑‑‑‑‑‑‑‑‑‑‑‑‑‑‑‑‑‑‑‑‑‑‑‑‑‑‑‑‑‑‑‑‑‑‑‑‑‑‑‑‑‑‑‑‑‑‑‑‑‑‑‑‑‑‑‑‑‑‑‑‑‑‑‑‑‑‑‑‑‑‑‑‑‑‑‑‑

Prostate Number Examined:  33  24  31  28   0   0   0   0

Unremarkable:  15  10   9  14   0   0   0   0

Hyperplasia

finding not present ‑  32  24  29  27   0   0   0   0

minimal 1   0   0   0   1   0   0   0   0

slight 2   1   0   1   0   0   0   0   0

moderate 3   0   0   1   0   0   0   0   0

Total Incidence:   1   0   2   1   0   0   0   0

Average Severity:   2.0   0.0   2.5   1.0   0.0   0.0   0.0   0.0

Inflammation, chronic‑active

finding not present ‑  16  10  11  14   0   0   0   0

minimal 1   5   6   9   7   0   0   0   0

slight 2   5   7   9   5   0   0   0   0

moderate 3   7   1   2   2   0   0   0   0

Total Incidence:  17  14  20  14   0   0   0   0

Average Severity:   2.1   1.6   1.7   1.6   0.0   0.0   0.0   0.0

‑‑‑‑‑‑‑‑‑‑‑‑‑‑‑‑‑‑‑‑‑‑‑‑‑‑‑‑‑‑‑‑‑‑‑‑‑‑‑‑‑‑‑‑‑‑‑‑‑‑‑‑‑‑‑‑‑‑‑‑‑‑‑‑‑‑‑‑‑‑‑‑‑‑‑‑‑‑‑‑‑‑‑‑‑‑‑‑‑‑‑‑‑‑‑‑‑‑‑‑‑‑‑‑‑‑‑

Table

Summary of Severity for Selected Microscopic Observations

Terminal Euthanasia (Dosing Phase)

Test Article (dosage) 1M 2M 3M 4M 1F 2F 3F 4F

‑‑‑‑‑‑‑‑‑‑‑‑‑‑‑‑‑‑‑‑‑‑‑‑‑‑‑ ‑‑‑‑‑‑‑‑ ‑‑ ‑‑ ‑‑ ‑‑ ‑‑ ‑‑ ‑‑ ‑‑

Benzonatate (PF‑00345410) mg/kg/day 0 10 30 90 0 5 15 50

‑‑‑‑‑‑‑‑‑‑‑‑‑‑‑‑‑‑‑‑‑‑‑‑‑‑‑‑‑‑‑‑‑‑‑‑‑‑‑‑‑‑‑‑‑‑‑‑‑‑‑‑‑‑‑‑‑‑‑‑‑‑‑‑‑‑‑‑‑‑‑‑‑‑‑‑‑‑‑‑‑‑‑‑‑‑‑‑‑‑‑‑‑‑‑‑‑‑‑‑‑‑‑‑‑‑‑‑

Tissue/ Group/Subgroup/Sex: 1/1/M 2/1/M 3/1/M 4/1/M 1/1/F 2/1/F 3/1/F 4/1/F

Observation Number of Animals:  33  24  31  28  25  23  24  30

‑‑‑‑‑‑‑‑‑‑‑‑‑‑‑‑‑‑‑‑‑‑‑‑‑‑‑‑‑‑‑‑‑‑‑‑‑‑‑‑‑‑‑‑‑‑‑‑‑‑‑‑‑‑‑‑‑‑‑‑‑‑‑‑‑‑‑‑‑‑‑‑‑‑‑‑‑‑‑‑‑‑‑‑‑‑‑‑‑‑‑‑‑‑‑‑‑‑‑‑‑‑‑‑‑‑‑‑

Seminal Vesicle Number Examined:  33  24  31  28   0   0   0   0

Unremarkable:  29  24  29  27   0   0   0   0

Decreased secretion

finding not present ‑  31  24  31  28   0   0   0   0

minimal 1   1   0   0   0   0   0   0   0

slight 2   1   0   0   0   0   0   0   0

Total Incidence:   2   0   0   0   0   0   0   0

Average Severity:   1.5   0.0   0.0   0.0   0.0   0.0   0.0   0.0

Hyperplasia

finding not present ‑  32  24  30  27   0   0   0   0

slight 2   1   0   0   0   0   0   0   0

moderate 3   0   0   1   1   0   0   0   0

Total Incidence:   1   0   1   1   0   0   0   0

Average Severity:   2.0   0.0   3.0   3.0   0.0   0.0   0.0   0.0

Inflammation, chronic‑active

finding not present ‑  30  24  29  28   0   0   0   0

slight 2   2   0   0   0   0   0   0   0

moderate 3   1   0   1   0   0   0   0   0

marked 4   0   0   1   0   0   0   0   0

Total Incidence:   3   0   2   0   0   0   0   0

Average Severity:   2.3   0.0   3.5   0.0   0.0   0.0   0.0   0.0

‑‑‑‑‑‑‑‑‑‑‑‑‑‑‑‑‑‑‑‑‑‑‑‑‑‑‑‑‑‑‑‑‑‑‑‑‑‑‑‑‑‑‑‑‑‑‑‑‑‑‑‑‑‑‑‑‑‑‑‑‑‑‑‑‑‑‑‑‑‑‑‑‑‑‑‑‑‑‑‑‑‑‑‑‑‑‑‑‑‑‑‑‑‑‑‑‑‑‑‑‑‑‑‑‑‑‑

Table

Summary of Severity for Selected Microscopic Observations

Terminal Euthanasia (Dosing Phase)

Test Article (dosage) 1M 2M 3M 4M 1F 2F 3F 4F

‑‑‑‑‑‑‑‑‑‑‑‑‑‑‑‑‑‑‑‑‑‑‑‑‑‑‑ ‑‑‑‑‑‑‑‑ ‑‑ ‑‑ ‑‑ ‑‑ ‑‑ ‑‑ ‑‑ ‑‑

Benzonatate (PF‑00345410) mg/kg/day 0 10 30 90 0 5 15 50

‑‑‑‑‑‑‑‑‑‑‑‑‑‑‑‑‑‑‑‑‑‑‑‑‑‑‑‑‑‑‑‑‑‑‑‑‑‑‑‑‑‑‑‑‑‑‑‑‑‑‑‑‑‑‑‑‑‑‑‑‑‑‑‑‑‑‑‑‑‑‑‑‑‑‑‑‑‑‑‑‑‑‑‑‑‑‑‑‑‑‑‑‑‑‑‑‑‑‑‑‑‑‑‑‑‑‑‑

Tissue/ Group/Subgroup/Sex: 1/1/M 2/1/M 3/1/M 4/1/M 1/1/F 2/1/F 3/1/F 4/1/F

Observation Number of Animals:  33  24  31  28  25  23  24  30

‑‑‑‑‑‑‑‑‑‑‑‑‑‑‑‑‑‑‑‑‑‑‑‑‑‑‑‑‑‑‑‑‑‑‑‑‑‑‑‑‑‑‑‑‑‑‑‑‑‑‑‑‑‑‑‑‑‑‑‑‑‑‑‑‑‑‑‑‑‑‑‑‑‑‑‑‑‑‑‑‑‑‑‑‑‑‑‑‑‑‑‑‑‑‑‑‑‑‑‑‑‑‑‑‑‑‑‑

Skin/Subcutis Number Examined:  33  23  31  28  25  23  24  30

Unremarkable:  22  19  28  20  24  22  20  25

Erosion/ulcer

finding not present ‑  33  22  31  28  25  22  23  29

slight 2   0   1   0   0   0   0   0   1

moderate 3   0   0   0   0   0   1   1   0

Total Incidence:   0   1   0   0   0   1   1   1

Average Severity:   0.0   2.0   0.0   0.0   0.0   3.0   3.0   2.0

Inflammation, chronic‑active

finding not present ‑  31  22  31  24  25  22  22  26

minimal 1   1   0   0   1   0   0   0   0

slight 2   0   0   0   1   0   0   0   4

moderate 3   1   1   0   2   0   1   2   0

Total Incidence:   2   1   0   4   0   1   2   4

Average Severity:   2.0   3.0   0.0   2.3   0.0   3.0   3.0   2.0

‑‑‑‑‑‑‑‑‑‑‑‑‑‑‑‑‑‑‑‑‑‑‑‑‑‑‑‑‑‑‑‑‑‑‑‑‑‑‑‑‑‑‑‑‑‑‑‑‑‑‑‑‑‑‑‑‑‑‑‑‑‑‑‑‑‑‑‑‑‑‑‑‑‑‑‑‑‑‑‑‑‑‑‑‑‑‑‑‑‑‑‑‑‑‑‑‑‑‑‑‑‑‑‑‑‑‑

Table

Summary of Severity for Selected Microscopic Observations

Terminal Euthanasia (Dosing Phase)

Test Article (dosage) 1M 2M 3M 4M 1F 2F 3F 4F

‑‑‑‑‑‑‑‑‑‑‑‑‑‑‑‑‑‑‑‑‑‑‑‑‑‑‑ ‑‑‑‑‑‑‑‑ ‑‑ ‑‑ ‑‑ ‑‑ ‑‑ ‑‑ ‑‑ ‑‑

Benzonatate (PF‑00345410) mg/kg/day 0 10 30 90 0 5 15 50

‑‑‑‑‑‑‑‑‑‑‑‑‑‑‑‑‑‑‑‑‑‑‑‑‑‑‑‑‑‑‑‑‑‑‑‑‑‑‑‑‑‑‑‑‑‑‑‑‑‑‑‑‑‑‑‑‑‑‑‑‑‑‑‑‑‑‑‑‑‑‑‑‑‑‑‑‑‑‑‑‑‑‑‑‑‑‑‑‑‑‑‑‑‑‑‑‑‑‑‑‑‑‑‑‑‑‑‑

Tissue/ Group/Subgroup/Sex: 1/1/M 2/1/M 3/1/M 4/1/M 1/1/F 2/1/F 3/1/F 4/1/F

Observation Number of Animals:  33  24  31  28  25  23  24  30

‑‑‑‑‑‑‑‑‑‑‑‑‑‑‑‑‑‑‑‑‑‑‑‑‑‑‑‑‑‑‑‑‑‑‑‑‑‑‑‑‑‑‑‑‑‑‑‑‑‑‑‑‑‑‑‑‑‑‑‑‑‑‑‑‑‑‑‑‑‑‑‑‑‑‑‑‑‑‑‑‑‑‑‑‑‑‑‑‑‑‑‑‑‑‑‑‑‑‑‑‑‑‑‑‑‑‑‑

Spinal Cord Number Examined:  33  24  31  28  25  23  24  30

Unremarkable:  33  22  29  26  24  22  23  28

Degeneration, axon, increased

finding not present ‑  33  22  29  26  24  22  23  28

minimal 1   0   2   2   2   1   1   1   1

slight 2   0   0   0   0   0   0   0   1

Total Incidence:   0   2   2   2   1   1   1   2

Average Severity:   0.0   1.0   1.0   1.0   1.0   1.0   1.0   1.5

‑‑‑‑‑‑‑‑‑‑‑‑‑‑‑‑‑‑‑‑‑‑‑‑‑‑‑‑‑‑‑‑‑‑‑‑‑‑‑‑‑‑‑‑‑‑‑‑‑‑‑‑‑‑‑‑‑‑‑‑‑‑‑‑‑‑‑‑‑‑‑‑‑‑‑‑‑‑‑‑‑‑‑‑‑‑‑‑‑‑‑‑‑‑‑‑‑‑‑‑‑‑‑‑‑‑‑

Table

Summary of Severity for Selected Microscopic Observations

Terminal Euthanasia (Dosing Phase)

Test Article (dosage) 1M 2M 3M 4M 1F 2F 3F 4F

‑‑‑‑‑‑‑‑‑‑‑‑‑‑‑‑‑‑‑‑‑‑‑‑‑‑‑ ‑‑‑‑‑‑‑‑ ‑‑ ‑‑ ‑‑ ‑‑ ‑‑ ‑‑ ‑‑ ‑‑

Benzonatate (PF‑00345410) mg/kg/day 0 10 30 90 0 5 15 50

‑‑‑‑‑‑‑‑‑‑‑‑‑‑‑‑‑‑‑‑‑‑‑‑‑‑‑‑‑‑‑‑‑‑‑‑‑‑‑‑‑‑‑‑‑‑‑‑‑‑‑‑‑‑‑‑‑‑‑‑‑‑‑‑‑‑‑‑‑‑‑‑‑‑‑‑‑‑‑‑‑‑‑‑‑‑‑‑‑‑‑‑‑‑‑‑‑‑‑‑‑‑‑‑‑‑‑‑

Tissue/ Group/Subgroup/Sex: 1/1/M 2/1/M 3/1/M 4/1/M 1/1/F 2/1/F 3/1/F 4/1/F

Observation Number of Animals:  33  24  31  28  25  23  24  30

‑‑‑‑‑‑‑‑‑‑‑‑‑‑‑‑‑‑‑‑‑‑‑‑‑‑‑‑‑‑‑‑‑‑‑‑‑‑‑‑‑‑‑‑‑‑‑‑‑‑‑‑‑‑‑‑‑‑‑‑‑‑‑‑‑‑‑‑‑‑‑‑‑‑‑‑‑‑‑‑‑‑‑‑‑‑‑‑‑‑‑‑‑‑‑‑‑‑‑‑‑‑‑‑‑‑‑‑

Spleen Number Examined:  33  24  31  28  25  23  24  30

Unremarkable:  17  18  22  14  14   7  10  11

Congestion

finding not present ‑  33  24  31  28  25  22  24  30

moderate 3   0   0   0   0   0   1   0   0

Total Incidence:   0   0   0   0   0   1   0   0

Average Severity:   0.0   0.0   0.0   0.0   0.0   3.0   0.0   0.0

Fibrosis, capsule

finding not present ‑  33  24  31  28  25  22  24  30

slight 2   0   0   0   0   0   1   0   0

Total Incidence:   0   0   0   0   0   1   0   0

Average Severity:   0.0   0.0   0.0   0.0   0.0   2.0   0.0   0.0

Hematoma

finding not present ‑  33  24  31  28  25  23  24  29

moderate 3   0   0   0   0   0   0   0   1

Total Incidence:   0   0   0   0   0   0   0   1

Average Severity:   0.0   0.0   0.0   0.0   0.0   0.0   0.0   3.0

‑‑‑‑‑‑‑‑‑‑‑‑‑‑‑‑‑‑‑‑‑‑‑‑‑‑‑‑‑‑‑‑‑‑‑‑‑‑‑‑‑‑‑‑‑‑‑‑‑‑‑‑‑‑‑‑‑‑‑‑‑‑‑‑‑‑‑‑‑‑‑‑‑‑‑‑‑‑‑‑‑‑‑‑‑‑‑‑‑‑‑‑‑‑‑‑‑‑‑‑‑‑‑‑‑‑‑

Table

Summary of Severity for Selected Microscopic Observations

Terminal Euthanasia (Dosing Phase)

Test Article (dosage) 1M 2M 3M 4M 1F 2F 3F 4F

‑‑‑‑‑‑‑‑‑‑‑‑‑‑‑‑‑‑‑‑‑‑‑‑‑‑‑ ‑‑‑‑‑‑‑‑ ‑‑ ‑‑ ‑‑ ‑‑ ‑‑ ‑‑ ‑‑ ‑‑

Benzonatate (PF‑00345410) mg/kg/day 0 10 30 90 0 5 15 50

‑‑‑‑‑‑‑‑‑‑‑‑‑‑‑‑‑‑‑‑‑‑‑‑‑‑‑‑‑‑‑‑‑‑‑‑‑‑‑‑‑‑‑‑‑‑‑‑‑‑‑‑‑‑‑‑‑‑‑‑‑‑‑‑‑‑‑‑‑‑‑‑‑‑‑‑‑‑‑‑‑‑‑‑‑‑‑‑‑‑‑‑‑‑‑‑‑‑‑‑‑‑‑‑‑‑‑‑

Tissue/ Group/Subgroup/Sex: 1/1/M 2/1/M 3/1/M 4/1/M 1/1/F 2/1/F 3/1/F 4/1/F

Observation Number of Animals:  33  24  31  28  25  23  24  30

‑‑‑‑‑‑‑‑‑‑‑‑‑‑‑‑‑‑‑‑‑‑‑‑‑‑‑‑‑‑‑‑‑‑‑‑‑‑‑‑‑‑‑‑‑‑‑‑‑‑‑‑‑‑‑‑‑‑‑‑‑‑‑‑‑‑‑‑‑‑‑‑‑‑‑‑‑‑‑‑‑‑‑‑‑‑‑‑‑‑‑‑‑‑‑‑‑‑‑‑‑‑‑‑‑‑‑‑

Spleen Number Examined:  33  24  31  28  25  23  24  30

Unremarkable:  17  18  22  14  14   7  10  11

Hematopoiesis, extramedullary,

increased

finding not present ‑  17  20  22  14  14   9  10  12

minimal 1  13   1   3   7   7   2   5   6

slight 2   3   1   5   7   4   9   6  10

moderate 3   0   1   1   0   0   3   3   1

marked 4   0   1   0   0   0   0   0   1

Total Incidence:  16   4   9  14  11  14  14  18

Average Severity:   1.2   2.5   1.8   1.5   1.4   2.1   1.9   1.8

Pigment, increased

finding not present ‑  33  24  31  28  25  22  24  30

minimal 1   0   0   0   0   0   1   0   0

Total Incidence:   0   0   0   0   0   1   0   0

Average Severity:   0.0   0.0   0.0   0.0   0.0   1.0   0.0   0.0

Sternum Number Examined:  33  24  31  28  25  23  24  30

Unremarkable:  33  24  31  28  25  23  24  30

‑‑‑‑‑‑‑‑‑‑‑‑‑‑‑‑‑‑‑‑‑‑‑‑‑‑‑‑‑‑‑‑‑‑‑‑‑‑‑‑‑‑‑‑‑‑‑‑‑‑‑‑‑‑‑‑‑‑‑‑‑‑‑‑‑‑‑‑‑‑‑‑‑‑‑‑‑‑‑‑‑‑‑‑‑‑‑‑‑‑‑‑‑‑‑‑‑‑‑‑‑‑‑‑‑‑‑

Table

Summary of Severity for Selected Microscopic Observations

Terminal Euthanasia (Dosing Phase)

Test Article (dosage) 1M 2M 3M 4M 1F 2F 3F 4F

‑‑‑‑‑‑‑‑‑‑‑‑‑‑‑‑‑‑‑‑‑‑‑‑‑‑‑ ‑‑‑‑‑‑‑‑ ‑‑ ‑‑ ‑‑ ‑‑ ‑‑ ‑‑ ‑‑ ‑‑

Benzonatate (PF‑00345410) mg/kg/day 0 10 30 90 0 5 15 50

‑‑‑‑‑‑‑‑‑‑‑‑‑‑‑‑‑‑‑‑‑‑‑‑‑‑‑‑‑‑‑‑‑‑‑‑‑‑‑‑‑‑‑‑‑‑‑‑‑‑‑‑‑‑‑‑‑‑‑‑‑‑‑‑‑‑‑‑‑‑‑‑‑‑‑‑‑‑‑‑‑‑‑‑‑‑‑‑‑‑‑‑‑‑‑‑‑‑‑‑‑‑‑‑‑‑‑‑

Tissue/ Group/Subgroup/Sex: 1/1/M 2/1/M 3/1/M 4/1/M 1/1/F 2/1/F 3/1/F 4/1/F

Observation Number of Animals:  33  24  31  28  25  23  24  30

‑‑‑‑‑‑‑‑‑‑‑‑‑‑‑‑‑‑‑‑‑‑‑‑‑‑‑‑‑‑‑‑‑‑‑‑‑‑‑‑‑‑‑‑‑‑‑‑‑‑‑‑‑‑‑‑‑‑‑‑‑‑‑‑‑‑‑‑‑‑‑‑‑‑‑‑‑‑‑‑‑‑‑‑‑‑‑‑‑‑‑‑‑‑‑‑‑‑‑‑‑‑‑‑‑‑‑‑

Stomach, Glandular Number Examined:  33  24  31  28  25  23  24  30

Unremarkable:  30  24  21  28  25  23  21  29

Degeneration, muscle

finding not present ‑  32  24  30  28  25  23  24  30

slight 2   1   0   1   0   0   0   0   0

Total Incidence:   1   0   1   0   0   0   0   0

Average Severity:   2.0   0.0   2.0   0.0   0.0   0.0   0.0   0.0

Erosion/ulcer

finding not present ‑  33  24  29  28  25  23  24  29

minimal 1   0   0   1   0   0   0   0   1

slight 2   0   0   1   0   0   0   0   0

Total Incidence:   0   0   2   0   0   0   0   1

Average Severity:   0.0   0.0   1.5   0.0   0.0   0.0   0.0   1.0

Hemorrhage

finding not present ‑  33  24  24  28  25  23  22  30

minimal 1   0   0   4   0   0   0   1   0

slight 2   0   0   2   0   0   0   1   0

moderate 3   0   0   1   0   0   0   0   0

Total Incidence:   0   0   7   0   0   0   2   0

Average Severity:   0.0   0.0   1.6   0.0   0.0   0.0   1.5   0.0

‑‑‑‑‑‑‑‑‑‑‑‑‑‑‑‑‑‑‑‑‑‑‑‑‑‑‑‑‑‑‑‑‑‑‑‑‑‑‑‑‑‑‑‑‑‑‑‑‑‑‑‑‑‑‑‑‑‑‑‑‑‑‑‑‑‑‑‑‑‑‑‑‑‑‑‑‑‑‑‑‑‑‑‑‑‑‑‑‑‑‑‑‑‑‑‑‑‑‑‑‑‑‑‑‑‑‑

Table

Summary of Severity for Selected Microscopic Observations

Terminal Euthanasia (Dosing Phase)

Test Article (dosage) 1M 2M 3M 4M 1F 2F 3F 4F

‑‑‑‑‑‑‑‑‑‑‑‑‑‑‑‑‑‑‑‑‑‑‑‑‑‑‑ ‑‑‑‑‑‑‑‑ ‑‑ ‑‑ ‑‑ ‑‑ ‑‑ ‑‑ ‑‑ ‑‑

Benzonatate (PF‑00345410) mg/kg/day 0 10 30 90 0 5 15 50

‑‑‑‑‑‑‑‑‑‑‑‑‑‑‑‑‑‑‑‑‑‑‑‑‑‑‑‑‑‑‑‑‑‑‑‑‑‑‑‑‑‑‑‑‑‑‑‑‑‑‑‑‑‑‑‑‑‑‑‑‑‑‑‑‑‑‑‑‑‑‑‑‑‑‑‑‑‑‑‑‑‑‑‑‑‑‑‑‑‑‑‑‑‑‑‑‑‑‑‑‑‑‑‑‑‑‑‑

Tissue/ Group/Subgroup/Sex: 1/1/M 2/1/M 3/1/M 4/1/M 1/1/F 2/1/F 3/1/F 4/1/F

Observation Number of Animals:  33  24  31  28  25  23  24  30

‑‑‑‑‑‑‑‑‑‑‑‑‑‑‑‑‑‑‑‑‑‑‑‑‑‑‑‑‑‑‑‑‑‑‑‑‑‑‑‑‑‑‑‑‑‑‑‑‑‑‑‑‑‑‑‑‑‑‑‑‑‑‑‑‑‑‑‑‑‑‑‑‑‑‑‑‑‑‑‑‑‑‑‑‑‑‑‑‑‑‑‑‑‑‑‑‑‑‑‑‑‑‑‑‑‑‑‑

Stomach, Glandular Number Examined:  33  24  31  28  25  23  24  30

Unremarkable:  30  24  21  28  25  23  21  29

Hyperplasia, epithelium

finding not present ‑  32  24  31  28  25  23  24  30

slight 2   1   0   0   0   0   0   0   0

Total Incidence:   1   0   0   0   0   0   0   0

Average Severity:   2.0   0.0   0.0   0.0   0.0   0.0   0.0   0.0

Inflammation, chronic‑active

finding not present ‑  32  24  31  28  25  23  24  30

slight 2   1   0   0   0   0   0   0   0

Total Incidence:   1   0   0   0   0   0   0   0

Average Severity:   2.0   0.0   0.0   0.0   0.0   0.0   0.0   0.0

Inflammation, vessel

finding not present ‑  33  24  30  28  25  23  23  30

minimal 1   0   0   1   0   0   0   0   0

slight 2   0   0   0   0   0   0   1   0

Total Incidence:   0   0   1   0   0   0   1   0

Average Severity:   0.0   0.0   1.0   0.0   0.0   0.0   2.0   0.0

‑‑‑‑‑‑‑‑‑‑‑‑‑‑‑‑‑‑‑‑‑‑‑‑‑‑‑‑‑‑‑‑‑‑‑‑‑‑‑‑‑‑‑‑‑‑‑‑‑‑‑‑‑‑‑‑‑‑‑‑‑‑‑‑‑‑‑‑‑‑‑‑‑‑‑‑‑‑‑‑‑‑‑‑‑‑‑‑‑‑‑‑‑‑‑‑‑‑‑‑‑‑‑‑‑‑‑

Table

Summary of Severity for Selected Microscopic Observations

Terminal Euthanasia (Dosing Phase)

Test Article (dosage) 1M 2M 3M 4M 1F 2F 3F 4F

‑‑‑‑‑‑‑‑‑‑‑‑‑‑‑‑‑‑‑‑‑‑‑‑‑‑‑ ‑‑‑‑‑‑‑‑ ‑‑ ‑‑ ‑‑ ‑‑ ‑‑ ‑‑ ‑‑ ‑‑

Benzonatate (PF‑00345410) mg/kg/day 0 10 30 90 0 5 15 50

‑‑‑‑‑‑‑‑‑‑‑‑‑‑‑‑‑‑‑‑‑‑‑‑‑‑‑‑‑‑‑‑‑‑‑‑‑‑‑‑‑‑‑‑‑‑‑‑‑‑‑‑‑‑‑‑‑‑‑‑‑‑‑‑‑‑‑‑‑‑‑‑‑‑‑‑‑‑‑‑‑‑‑‑‑‑‑‑‑‑‑‑‑‑‑‑‑‑‑‑‑‑‑‑‑‑‑‑

Tissue/ Group/Subgroup/Sex: 1/1/M 2/1/M 3/1/M 4/1/M 1/1/F 2/1/F 3/1/F 4/1/F

Observation Number of Animals:  33  24  31  28  25  23  24  30

‑‑‑‑‑‑‑‑‑‑‑‑‑‑‑‑‑‑‑‑‑‑‑‑‑‑‑‑‑‑‑‑‑‑‑‑‑‑‑‑‑‑‑‑‑‑‑‑‑‑‑‑‑‑‑‑‑‑‑‑‑‑‑‑‑‑‑‑‑‑‑‑‑‑‑‑‑‑‑‑‑‑‑‑‑‑‑‑‑‑‑‑‑‑‑‑‑‑‑‑‑‑‑‑‑‑‑‑

Stomach,

Nonglandular Number Examined: 33 24 31 28 25 23 24 30

Unremarkable: 30 23 30 28 25 23 23 30

Hyperplasia, epithelium

finding not present ‑  30  24  30  28  25  23  23  30

minimal 1   0   0   0   0   0   0   1   0

slight 2   2   0   1   0   0   0   0   0

moderate 3   1   0   0   0   0   0   0   0

Total Incidence:   3   0   1   0   0   0   1   0

Average Severity:   2.3   0.0   2.0   0.0   0.0   0.0   1.0   0.0

Inflammation, chronic‑active

finding not present ‑  30  24  31  28  25  23  24  30

slight 2   2   0   0   0   0   0   0   0

moderate 3   1   0   0   0   0   0   0   0

Total Incidence:   3   0   0   0   0   0   0   0

Average Severity:   2.3   0.0   0.0   0.0   0.0   0.0   0.0   0.0

Ulcer/erosion

finding not present ‑  32  24  31  28  25  23  24  30

minimal 1   1   0   0   0   0   0   0   0

Total Incidence:   1   0   0   0   0   0   0   0

Average Severity:   1.0   0.0   0.0   0.0   0.0   0.0   0.0   0.0

‑‑‑‑‑‑‑‑‑‑‑‑‑‑‑‑‑‑‑‑‑‑‑‑‑‑‑‑‑‑‑‑‑‑‑‑‑‑‑‑‑‑‑‑‑‑‑‑‑‑‑‑‑‑‑‑‑‑‑‑‑‑‑‑‑‑‑‑‑‑‑‑‑‑‑‑‑‑‑‑‑‑‑‑‑‑‑‑‑‑‑‑‑‑‑‑‑‑‑‑‑‑‑‑‑‑‑

Table

Summary of Severity for Selected Microscopic Observations

Terminal Euthanasia (Dosing Phase)

Test Article (dosage) 1M 2M 3M 4M 1F 2F 3F 4F

‑‑‑‑‑‑‑‑‑‑‑‑‑‑‑‑‑‑‑‑‑‑‑‑‑‑‑ ‑‑‑‑‑‑‑‑ ‑‑ ‑‑ ‑‑ ‑‑ ‑‑ ‑‑ ‑‑ ‑‑

Benzonatate (PF‑00345410) mg/kg/day 0 10 30 90 0 5 15 50

‑‑‑‑‑‑‑‑‑‑‑‑‑‑‑‑‑‑‑‑‑‑‑‑‑‑‑‑‑‑‑‑‑‑‑‑‑‑‑‑‑‑‑‑‑‑‑‑‑‑‑‑‑‑‑‑‑‑‑‑‑‑‑‑‑‑‑‑‑‑‑‑‑‑‑‑‑‑‑‑‑‑‑‑‑‑‑‑‑‑‑‑‑‑‑‑‑‑‑‑‑‑‑‑‑‑‑‑

Tissue/ Group/Subgroup/Sex: 1/1/M 2/1/M 3/1/M 4/1/M 1/1/F 2/1/F 3/1/F 4/1/F

Observation Number of Animals:  33  24  31  28  25  23  24  30

‑‑‑‑‑‑‑‑‑‑‑‑‑‑‑‑‑‑‑‑‑‑‑‑‑‑‑‑‑‑‑‑‑‑‑‑‑‑‑‑‑‑‑‑‑‑‑‑‑‑‑‑‑‑‑‑‑‑‑‑‑‑‑‑‑‑‑‑‑‑‑‑‑‑‑‑‑‑‑‑‑‑‑‑‑‑‑‑‑‑‑‑‑‑‑‑‑‑‑‑‑‑‑‑‑‑‑‑

Testis Number Examined:  33  24  31  28   0   0   0   0

Unremarkable:  26  20  27  23   0   0   0   0

Atrophy/degeneration

finding not present ‑  28  21  29  25   0   0   0   0

minimal 1   0   0   0   1   0   0   0   0

slight 2   1   0   0   0   0   0   0   0

moderate 3   3   3   2   1   0   0   0   0

marked 4   1   0   0   1   0   0   0   0

Total Incidence:   5   3   2   3   0   0   0   0

Average Severity:   3.0   3.0   3.0   2.7   0.0   0.0   0.0   0.0

Edema

finding not present ‑  33  24  30  27   0   0   0   0

slight 2   0   0   1   0   0   0   0   0

moderate 3   0   0   0   1   0   0   0   0

Total Incidence:   0   0   1   1   0   0   0   0

Average Severity:   0.0   0.0   2.0   3.0   0.0   0.0   0.0   0.0

Granuloma, sperm

finding not present ‑  32  24  31  28   0   0   0   0

moderate 3   1   0   0   0   0   0   0   0

Total Incidence:   1   0   0   0   0   0   0   0

Average Severity:   3.0   0.0   0.0   0.0   0.0   0.0   0.0   0.0

‑‑‑‑‑‑‑‑‑‑‑‑‑‑‑‑‑‑‑‑‑‑‑‑‑‑‑‑‑‑‑‑‑‑‑‑‑‑‑‑‑‑‑‑‑‑‑‑‑‑‑‑‑‑‑‑‑‑‑‑‑‑‑‑‑‑‑‑‑‑‑‑‑‑‑‑‑‑‑‑‑‑‑‑‑‑‑‑‑‑‑‑‑‑‑‑‑‑‑‑‑‑‑‑‑‑‑

Table

Summary of Severity for Selected Microscopic Observations

Terminal Euthanasia (Dosing Phase)

Test Article (dosage) 1M 2M 3M 4M 1F 2F 3F 4F

‑‑‑‑‑‑‑‑‑‑‑‑‑‑‑‑‑‑‑‑‑‑‑‑‑‑‑ ‑‑‑‑‑‑‑‑ ‑‑ ‑‑ ‑‑ ‑‑ ‑‑ ‑‑ ‑‑ ‑‑

Benzonatate (PF‑00345410) mg/kg/day 0 10 30 90 0 5 15 50

‑‑‑‑‑‑‑‑‑‑‑‑‑‑‑‑‑‑‑‑‑‑‑‑‑‑‑‑‑‑‑‑‑‑‑‑‑‑‑‑‑‑‑‑‑‑‑‑‑‑‑‑‑‑‑‑‑‑‑‑‑‑‑‑‑‑‑‑‑‑‑‑‑‑‑‑‑‑‑‑‑‑‑‑‑‑‑‑‑‑‑‑‑‑‑‑‑‑‑‑‑‑‑‑‑‑‑‑

Tissue/ Group/Subgroup/Sex: 1/1/M 2/1/M 3/1/M 4/1/M 1/1/F 2/1/F 3/1/F 4/1/F

Observation Number of Animals:  33  24  31  28  25  23  24  30

‑‑‑‑‑‑‑‑‑‑‑‑‑‑‑‑‑‑‑‑‑‑‑‑‑‑‑‑‑‑‑‑‑‑‑‑‑‑‑‑‑‑‑‑‑‑‑‑‑‑‑‑‑‑‑‑‑‑‑‑‑‑‑‑‑‑‑‑‑‑‑‑‑‑‑‑‑‑‑‑‑‑‑‑‑‑‑‑‑‑‑‑‑‑‑‑‑‑‑‑‑‑‑‑‑‑‑‑

Thymus Number Examined:  32  24  30  27  25  22  24  30

Unremarkable:  24  16  20  17  11  13  15  14

Cyst, increased

finding not present ‑  32  24  30  27  23  22  22  26

minimal 1   0   0   0   0   0   0   2   2

moderate 3   0   0   0   0   2   0   0   1

marked 4   0   0   0   0   0   0   0   1

Total Incidence:   0   0   0   0   2   0   2   4

Average Severity:   0.0   0.0   0.0   0.0   3.0   0.0   1.0   2.3

Hemorrhage

finding not present ‑  32  24  29  27  23  21  23  27

minimal 1   0   0   0   0   1   0   0   0

slight 2   0   0   1   0   0   1   1   3

moderate 3   0   0   0   0   1   0   0   0

Total Incidence:   0   0   1   0   2   1   1   3

Average Severity:   0.0   0.0   2.0   0.0   2.0   2.0   2.0   2.0

Hyperplasia, epithelium

finding not present ‑  27  19  26  22  19  18  19  20

minimal 1   2   2   1   2   1   2   2   4

slight 2   3   3   3   3   5   1   3   3

moderate 3   0   0   0   0   0   1   0   3

Total Incidence:   5   5   4   5   6   4   5  10

Average Severity:   1.6   1.6   1.8   1.6   1.8   1.8   1.6   1.9

‑‑‑‑‑‑‑‑‑‑‑‑‑‑‑‑‑‑‑‑‑‑‑‑‑‑‑‑‑‑‑‑‑‑‑‑‑‑‑‑‑‑‑‑‑‑‑‑‑‑‑‑‑‑‑‑‑‑‑‑‑‑‑‑‑‑‑‑‑‑‑‑‑‑‑‑‑‑‑‑‑‑‑‑‑‑‑‑‑‑‑‑‑‑‑‑‑‑‑‑‑‑‑‑‑‑‑

Table

Summary of Severity for Selected Microscopic Observations

Terminal Euthanasia (Dosing Phase)

Test Article (dosage) 1M 2M 3M 4M 1F 2F 3F 4F

‑‑‑‑‑‑‑‑‑‑‑‑‑‑‑‑‑‑‑‑‑‑‑‑‑‑‑ ‑‑‑‑‑‑‑‑ ‑‑ ‑‑ ‑‑ ‑‑ ‑‑ ‑‑ ‑‑ ‑‑

Benzonatate (PF‑00345410) mg/kg/day 0 10 30 90 0 5 15 50

‑‑‑‑‑‑‑‑‑‑‑‑‑‑‑‑‑‑‑‑‑‑‑‑‑‑‑‑‑‑‑‑‑‑‑‑‑‑‑‑‑‑‑‑‑‑‑‑‑‑‑‑‑‑‑‑‑‑‑‑‑‑‑‑‑‑‑‑‑‑‑‑‑‑‑‑‑‑‑‑‑‑‑‑‑‑‑‑‑‑‑‑‑‑‑‑‑‑‑‑‑‑‑‑‑‑‑‑

Tissue/ Group/Subgroup/Sex: 1/1/M 2/1/M 3/1/M 4/1/M 1/1/F 2/1/F 3/1/F 4/1/F

Observation Number of Animals:  33  24  31  28  25  23  24  30

‑‑‑‑‑‑‑‑‑‑‑‑‑‑‑‑‑‑‑‑‑‑‑‑‑‑‑‑‑‑‑‑‑‑‑‑‑‑‑‑‑‑‑‑‑‑‑‑‑‑‑‑‑‑‑‑‑‑‑‑‑‑‑‑‑‑‑‑‑‑‑‑‑‑‑‑‑‑‑‑‑‑‑‑‑‑‑‑‑‑‑‑‑‑‑‑‑‑‑‑‑‑‑‑‑‑‑‑

Thymus Number Examined:  32  24  30  27  25  22  24  30

Unremarkable:  24  16  20  17  11  13  15  14

Hyperplasia, lymphocyte

finding not present ‑  29  20  23  22  19  18  20  25

minimal 1   1   1   3   1   0   1   0   1

slight 2   1   2   1   4   3   1   2   1

moderate 3   1   1   3   0   2   2   1   2

marked 4   0   0   0   0   1   0   1   1

Total Incidence:   3   4   7   5   6   4   4   5

Average Severity:   2.0   2.0   2.0   1.8   2.7   2.3   2.8   2.6

Inflammation, chronic‑active

finding not present ‑  32  24  30  27  25  22  23  30

slight 2   0   0   0   0   0   0   1   0

Total Incidence:   0   0   0   0   0   0   1   0

Average Severity:   0.0   0.0   0.0   0.0   0.0   0.0   2.0   0.0

‑‑‑‑‑‑‑‑‑‑‑‑‑‑‑‑‑‑‑‑‑‑‑‑‑‑‑‑‑‑‑‑‑‑‑‑‑‑‑‑‑‑‑‑‑‑‑‑‑‑‑‑‑‑‑‑‑‑‑‑‑‑‑‑‑‑‑‑‑‑‑‑‑‑‑‑‑‑‑‑‑‑‑‑‑‑‑‑‑‑‑‑‑‑‑‑‑‑‑‑‑‑‑‑‑‑‑

Table

Summary of Severity for Selected Microscopic Observations

Terminal Euthanasia (Dosing Phase)

Test Article (dosage) 1M 2M 3M 4M 1F 2F 3F 4F

‑‑‑‑‑‑‑‑‑‑‑‑‑‑‑‑‑‑‑‑‑‑‑‑‑‑‑ ‑‑‑‑‑‑‑‑ ‑‑ ‑‑ ‑‑ ‑‑ ‑‑ ‑‑ ‑‑ ‑‑

Benzonatate (PF‑00345410) mg/kg/day 0 10 30 90 0 5 15 50

‑‑‑‑‑‑‑‑‑‑‑‑‑‑‑‑‑‑‑‑‑‑‑‑‑‑‑‑‑‑‑‑‑‑‑‑‑‑‑‑‑‑‑‑‑‑‑‑‑‑‑‑‑‑‑‑‑‑‑‑‑‑‑‑‑‑‑‑‑‑‑‑‑‑‑‑‑‑‑‑‑‑‑‑‑‑‑‑‑‑‑‑‑‑‑‑‑‑‑‑‑‑‑‑‑‑‑‑

Tissue/ Group/Subgroup/Sex: 1/1/M 2/1/M 3/1/M 4/1/M 1/1/F 2/1/F 3/1/F 4/1/F

Observation Number of Animals:  33  24  31  28  25  23  24  30

‑‑‑‑‑‑‑‑‑‑‑‑‑‑‑‑‑‑‑‑‑‑‑‑‑‑‑‑‑‑‑‑‑‑‑‑‑‑‑‑‑‑‑‑‑‑‑‑‑‑‑‑‑‑‑‑‑‑‑‑‑‑‑‑‑‑‑‑‑‑‑‑‑‑‑‑‑‑‑‑‑‑‑‑‑‑‑‑‑‑‑‑‑‑‑‑‑‑‑‑‑‑‑‑‑‑‑‑

Thyroid Number Examined:  33  24  31  28  25  23  24  30

Unremarkable:   0   0   0   0   1   2   0   0

Cyst, follicle

finding not present ‑  27  17  29  26  20  18  22  26

minimal 1   1   0   0   1   3   4   1   0

slight 2   4   7   1   1   2   0   1   4

moderate 3   1   0   1   0   0   1   0   0

Total Incidence:   6   7   2   2   5   5   2   4

Average Severity:   2.0   2.0   2.5   1.5   1.4   1.4   1.5   2.0

Hyperplasia, diffuse, C‑cell

finding not present ‑   0   1   1   0   2   5   0   1

minimal 1   6   5   8   3   8  12   9   9

slight 2  24  17  19  22  13   6  13  16

moderate 3   3   1   3   3   2   0   2   4

Total Incidence:  33  23  30  28  23  18  24  29

Average Severity:   1.9   1.8   1.8   2.0   1.7   1.3   1.7   1.8

‑‑‑‑‑‑‑‑‑‑‑‑‑‑‑‑‑‑‑‑‑‑‑‑‑‑‑‑‑‑‑‑‑‑‑‑‑‑‑‑‑‑‑‑‑‑‑‑‑‑‑‑‑‑‑‑‑‑‑‑‑‑‑‑‑‑‑‑‑‑‑‑‑‑‑‑‑‑‑‑‑‑‑‑‑‑‑‑‑‑‑‑‑‑‑‑‑‑‑‑‑‑‑‑‑‑‑

Table

Summary of Severity for Selected Microscopic Observations

Terminal Euthanasia (Dosing Phase)

Test Article (dosage) 1M 2M 3M 4M 1F 2F 3F 4F

‑‑‑‑‑‑‑‑‑‑‑‑‑‑‑‑‑‑‑‑‑‑‑‑‑‑‑ ‑‑‑‑‑‑‑‑ ‑‑ ‑‑ ‑‑ ‑‑ ‑‑ ‑‑ ‑‑ ‑‑

Benzonatate (PF‑00345410) mg/kg/day 0 10 30 90 0 5 15 50

‑‑‑‑‑‑‑‑‑‑‑‑‑‑‑‑‑‑‑‑‑‑‑‑‑‑‑‑‑‑‑‑‑‑‑‑‑‑‑‑‑‑‑‑‑‑‑‑‑‑‑‑‑‑‑‑‑‑‑‑‑‑‑‑‑‑‑‑‑‑‑‑‑‑‑‑‑‑‑‑‑‑‑‑‑‑‑‑‑‑‑‑‑‑‑‑‑‑‑‑‑‑‑‑‑‑‑‑

Tissue/ Group/Subgroup/Sex: 1/1/M 2/1/M 3/1/M 4/1/M 1/1/F 2/1/F 3/1/F 4/1/F

Observation Number of Animals:  33  24  31  28  25  23  24  30

‑‑‑‑‑‑‑‑‑‑‑‑‑‑‑‑‑‑‑‑‑‑‑‑‑‑‑‑‑‑‑‑‑‑‑‑‑‑‑‑‑‑‑‑‑‑‑‑‑‑‑‑‑‑‑‑‑‑‑‑‑‑‑‑‑‑‑‑‑‑‑‑‑‑‑‑‑‑‑‑‑‑‑‑‑‑‑‑‑‑‑‑‑‑‑‑‑‑‑‑‑‑‑‑‑‑‑‑

Thyroid Number Examined:  33  24  31  28  25  23  24  30

Unremarkable:   0   0   0   0   1   2   0   0

Hyperplasia, focal, C‑cell

finding not present ‑  29  22  28  24  24  19  20  27

minimal 1   0   0   2   0   0   0   1   1

slight 2   2   1   0   2   0   2   1   1

moderate 3   2   1   0   2   1   2   2   1

marked 4   0   0   1   0   0   0   0   0

Total Incidence:   4   2   3   4   1   4   4   3

Average Severity:   2.5   2.5   2.0   2.5   3.0   2.5   2.3   2.0

Hyperplasia, follicular cell

finding not present ‑  27  18  24  25  23  19  22  28

minimal 1   1   2   0   1   1   2   1   0

slight 2   2   3   5   1   1   1   0   1

moderate 3   3   0   2   1   0   1   1   1

marked 4   0   1   0   0   0   0   0   0

Total Incidence:   6   6   7   3   2   4   2   2

Average Severity:   2.3   2.0   2.3   2.0   1.5   1.8   2.0   2.5

Infiltrate, mononuclear cell

finding not present ‑  33  24  31  27  25  22  24  30

minimal 1   0   0   0   1   0   1   0   0

Total Incidence:   0   0   0   1   0   1   0   0

Average Severity:   0.0   0.0   0.0   1.0   0.0   1.0   0.0   0.0

‑‑‑‑‑‑‑‑‑‑‑‑‑‑‑‑‑‑‑‑‑‑‑‑‑‑‑‑‑‑‑‑‑‑‑‑‑‑‑‑‑‑‑‑‑‑‑‑‑‑‑‑‑‑‑‑‑‑‑‑‑‑‑‑‑‑‑‑‑‑‑‑‑‑‑‑‑‑‑‑‑‑‑‑‑‑‑‑‑‑‑‑‑‑‑‑‑‑‑‑‑‑‑‑‑‑‑

Table

Summary of Severity for Selected Microscopic Observations

Terminal Euthanasia (Dosing Phase)

Test Article (dosage) 1M 2M 3M 4M 1F 2F 3F 4F

‑‑‑‑‑‑‑‑‑‑‑‑‑‑‑‑‑‑‑‑‑‑‑‑‑‑‑ ‑‑‑‑‑‑‑‑ ‑‑ ‑‑ ‑‑ ‑‑ ‑‑ ‑‑ ‑‑ ‑‑

Benzonatate (PF‑00345410) mg/kg/day 0 10 30 90 0 5 15 50

‑‑‑‑‑‑‑‑‑‑‑‑‑‑‑‑‑‑‑‑‑‑‑‑‑‑‑‑‑‑‑‑‑‑‑‑‑‑‑‑‑‑‑‑‑‑‑‑‑‑‑‑‑‑‑‑‑‑‑‑‑‑‑‑‑‑‑‑‑‑‑‑‑‑‑‑‑‑‑‑‑‑‑‑‑‑‑‑‑‑‑‑‑‑‑‑‑‑‑‑‑‑‑‑‑‑‑‑

Tissue/ Group/Subgroup/Sex: 1/1/M 2/1/M 3/1/M 4/1/M 1/1/F 2/1/F 3/1/F 4/1/F

Observation Number of Animals:  33  24  31  28  25  23  24  30

‑‑‑‑‑‑‑‑‑‑‑‑‑‑‑‑‑‑‑‑‑‑‑‑‑‑‑‑‑‑‑‑‑‑‑‑‑‑‑‑‑‑‑‑‑‑‑‑‑‑‑‑‑‑‑‑‑‑‑‑‑‑‑‑‑‑‑‑‑‑‑‑‑‑‑‑‑‑‑‑‑‑‑‑‑‑‑‑‑‑‑‑‑‑‑‑‑‑‑‑‑‑‑‑‑‑‑‑

Tongue Number Examined:  33  24  31  28  25  23  24  30

Unremarkable:  33  24  30  28  25  23  23  29

Infiltrate, mononuclear cell

finding not present ‑  33  24  30  28  25  23  24  29

minimal 1   0   0   1   0   0   0   0   0

slight 2   0   0   0   0   0   0   0   1

Total Incidence:   0   0   1   0   0   0   0   1

Average Severity:   0.0   0.0   1.0   0.0   0.0   0.0   0.0   2.0

Inflammation, chronic‑active

finding not present ‑  33  24  31  28  25  23  23  30

moderate 3   0   0   0   0   0   0   1   0

Total Incidence:   0   0   0   0   0   0   1   0

Average Severity:   0.0   0.0   0.0   0.0   0.0   0.0   3.0   0.0

Trachea Number Examined:  33  24  31  28  25  23  24  30

Unremarkable:  33  24  31  28  25  23  24  30

‑‑‑‑‑‑‑‑‑‑‑‑‑‑‑‑‑‑‑‑‑‑‑‑‑‑‑‑‑‑‑‑‑‑‑‑‑‑‑‑‑‑‑‑‑‑‑‑‑‑‑‑‑‑‑‑‑‑‑‑‑‑‑‑‑‑‑‑‑‑‑‑‑‑‑‑‑‑‑‑‑‑‑‑‑‑‑‑‑‑‑‑‑‑‑‑‑‑‑‑‑‑‑‑‑‑‑

Table

Summary of Severity for Selected Microscopic Observations

Terminal Euthanasia (Dosing Phase)

Test Article (dosage) 1M 2M 3M 4M 1F 2F 3F 4F

‑‑‑‑‑‑‑‑‑‑‑‑‑‑‑‑‑‑‑‑‑‑‑‑‑‑‑ ‑‑‑‑‑‑‑‑ ‑‑ ‑‑ ‑‑ ‑‑ ‑‑ ‑‑ ‑‑ ‑‑

Benzonatate (PF‑00345410) mg/kg/day 0 10 30 90 0 5 15 50

‑‑‑‑‑‑‑‑‑‑‑‑‑‑‑‑‑‑‑‑‑‑‑‑‑‑‑‑‑‑‑‑‑‑‑‑‑‑‑‑‑‑‑‑‑‑‑‑‑‑‑‑‑‑‑‑‑‑‑‑‑‑‑‑‑‑‑‑‑‑‑‑‑‑‑‑‑‑‑‑‑‑‑‑‑‑‑‑‑‑‑‑‑‑‑‑‑‑‑‑‑‑‑‑‑‑‑‑

Tissue/ Group/Subgroup/Sex: 1/1/M 2/1/M 3/1/M 4/1/M 1/1/F 2/1/F 3/1/F 4/1/F

Observation Number of Animals:  33  24  31  28  25  23  24  30

‑‑‑‑‑‑‑‑‑‑‑‑‑‑‑‑‑‑‑‑‑‑‑‑‑‑‑‑‑‑‑‑‑‑‑‑‑‑‑‑‑‑‑‑‑‑‑‑‑‑‑‑‑‑‑‑‑‑‑‑‑‑‑‑‑‑‑‑‑‑‑‑‑‑‑‑‑‑‑‑‑‑‑‑‑‑‑‑‑‑‑‑‑‑‑‑‑‑‑‑‑‑‑‑‑‑‑‑

Ureter Number Examined:  33  24  31  28  25  23  24  29

Unremarkable:  33  24  30  27  25  23  24  29

Hyperplasia, transitional cell

finding not present ‑  33  24  31  27  25  23  24  29

slight 2   0   0   0   1   0   0   0   0

Total Incidence:   0   0   0   1   0   0   0   0

Average Severity:   0.0   0.0   0.0   2.0   0.0   0.0   0.0   0.0

Inflammation

finding not present ‑  33  24  30  27  25  23  24  29

slight 2   0   0   0   1   0   0   0   0

moderate 3   0   0   1   0   0   0   0   0

Total Incidence:   0   0   1   1   0   0   0   0

Average Severity:   0.0   0.0   3.0   2.0   0.0   0.0   0.0   0.0

‑‑‑‑‑‑‑‑‑‑‑‑‑‑‑‑‑‑‑‑‑‑‑‑‑‑‑‑‑‑‑‑‑‑‑‑‑‑‑‑‑‑‑‑‑‑‑‑‑‑‑‑‑‑‑‑‑‑‑‑‑‑‑‑‑‑‑‑‑‑‑‑‑‑‑‑‑‑‑‑‑‑‑‑‑‑‑‑‑‑‑‑‑‑‑‑‑‑‑‑‑‑‑‑‑‑‑

Table

Summary of Severity for Selected Microscopic Observations

Terminal Euthanasia (Dosing Phase)

Test Article (dosage) 1M 2M 3M 4M 1F 2F 3F 4F

‑‑‑‑‑‑‑‑‑‑‑‑‑‑‑‑‑‑‑‑‑‑‑‑‑‑‑ ‑‑‑‑‑‑‑‑ ‑‑ ‑‑ ‑‑ ‑‑ ‑‑ ‑‑ ‑‑ ‑‑

Benzonatate (PF‑00345410) mg/kg/day 0 10 30 90 0 5 15 50

‑‑‑‑‑‑‑‑‑‑‑‑‑‑‑‑‑‑‑‑‑‑‑‑‑‑‑‑‑‑‑‑‑‑‑‑‑‑‑‑‑‑‑‑‑‑‑‑‑‑‑‑‑‑‑‑‑‑‑‑‑‑‑‑‑‑‑‑‑‑‑‑‑‑‑‑‑‑‑‑‑‑‑‑‑‑‑‑‑‑‑‑‑‑‑‑‑‑‑‑‑‑‑‑‑‑‑‑

Tissue/ Group/Subgroup/Sex: 1/1/M 2/1/M 3/1/M 4/1/M 1/1/F 2/1/F 3/1/F 4/1/F

Observation Number of Animals:  33  24  31  28  25  23  24  30

‑‑‑‑‑‑‑‑‑‑‑‑‑‑‑‑‑‑‑‑‑‑‑‑‑‑‑‑‑‑‑‑‑‑‑‑‑‑‑‑‑‑‑‑‑‑‑‑‑‑‑‑‑‑‑‑‑‑‑‑‑‑‑‑‑‑‑‑‑‑‑‑‑‑‑‑‑‑‑‑‑‑‑‑‑‑‑‑‑‑‑‑‑‑‑‑‑‑‑‑‑‑‑‑‑‑‑‑

Urinary Bladder Number Examined:  33  24  31  28  25  23  24  29

Unremarkable:  33  24  30  28  25  23  24  29

Hemorrhage

finding not present ‑  33  24  30  28  25  23  24  29

moderate 3   0   0   1   0   0   0   0   0

Total Incidence:   0   0   1   0   0   0   0   0

Average Severity:   0.0   0.0   3.0   0.0   0.0   0.0   0.0   0.0

Inflammation

finding not present ‑  33  24  30  28  25  23  24  29

moderate 3   0   0   1   0   0   0   0   0

Total Incidence:   0   0   1   0   0   0   0   0

Average Severity:   0.0   0.0   3.0   0.0   0.0   0.0   0.0   0.0

‑‑‑‑‑‑‑‑‑‑‑‑‑‑‑‑‑‑‑‑‑‑‑‑‑‑‑‑‑‑‑‑‑‑‑‑‑‑‑‑‑‑‑‑‑‑‑‑‑‑‑‑‑‑‑‑‑‑‑‑‑‑‑‑‑‑‑‑‑‑‑‑‑‑‑‑‑‑‑‑‑‑‑‑‑‑‑‑‑‑‑‑‑‑‑‑‑‑‑‑‑‑‑‑‑‑‑

Table

Summary of Severity for Selected Microscopic Observations

Terminal Euthanasia (Dosing Phase)

Test Article (dosage) 1M 2M 3M 4M 1F 2F 3F 4F

‑‑‑‑‑‑‑‑‑‑‑‑‑‑‑‑‑‑‑‑‑‑‑‑‑‑‑ ‑‑‑‑‑‑‑‑ ‑‑ ‑‑ ‑‑ ‑‑ ‑‑ ‑‑ ‑‑ ‑‑

Benzonatate (PF‑00345410) mg/kg/day 0 10 30 90 0 5 15 50

‑‑‑‑‑‑‑‑‑‑‑‑‑‑‑‑‑‑‑‑‑‑‑‑‑‑‑‑‑‑‑‑‑‑‑‑‑‑‑‑‑‑‑‑‑‑‑‑‑‑‑‑‑‑‑‑‑‑‑‑‑‑‑‑‑‑‑‑‑‑‑‑‑‑‑‑‑‑‑‑‑‑‑‑‑‑‑‑‑‑‑‑‑‑‑‑‑‑‑‑‑‑‑‑‑‑‑‑

Tissue/ Group/Subgroup/Sex: 1/1/M 2/1/M 3/1/M 4/1/M 1/1/F 2/1/F 3/1/F 4/1/F

Observation Number of Animals:  33  24  31  28  25  23  24  30

‑‑‑‑‑‑‑‑‑‑‑‑‑‑‑‑‑‑‑‑‑‑‑‑‑‑‑‑‑‑‑‑‑‑‑‑‑‑‑‑‑‑‑‑‑‑‑‑‑‑‑‑‑‑‑‑‑‑‑‑‑‑‑‑‑‑‑‑‑‑‑‑‑‑‑‑‑‑‑‑‑‑‑‑‑‑‑‑‑‑‑‑‑‑‑‑‑‑‑‑‑‑‑‑‑‑‑‑

Uterus Number Examined:   0   0   0   0  25  23  24  30

Unremarkable:   0   0   0   0  15  14  15  23

Cyst

finding not present ‑   0   0   0   0  24  18  19  27

slight 2   0   0   0   0   0   2   1   2

moderate 3   0   0   0   0   1   1   4   1

marked 4   0   0   0   0   0   2   0   0

Total Incidence:   0   0   0   0   1   5   5   3

Average Severity:   0.0   0.0   0.0   0.0   3.0   3.0   2.8   2.3

Dilatation

finding not present ‑   0   0   0   0  22  23  22  30

slight 2   0   0   0   0   1   0   2   0

moderate 3   0   0   0   0   2   0   0   0

Total Incidence:   0   0   0   0   3   0   2   0

Average Severity:   0.0   0.0   0.0   0.0   2.7   0.0   2.0   0.0

Hyperplasia, cystic endometrial

finding not present ‑   0   0   0   0  23  22  23  29

minimal 1   0   0   0   0   1   0   1   0

slight 2   0   0   0   0   1   1   0   1

Total Incidence:   0   0   0   0   2   1   1   1

Average Severity:   0.0   0.0   0.0   0.0   1.5   2.0   1.0   2.0

‑‑‑‑‑‑‑‑‑‑‑‑‑‑‑‑‑‑‑‑‑‑‑‑‑‑‑‑‑‑‑‑‑‑‑‑‑‑‑‑‑‑‑‑‑‑‑‑‑‑‑‑‑‑‑‑‑‑‑‑‑‑‑‑‑‑‑‑‑‑‑‑‑‑‑‑‑‑‑‑‑‑‑‑‑‑‑‑‑‑‑‑‑‑‑‑‑‑‑‑‑‑‑‑‑‑‑

Table

Summary of Severity for Selected Microscopic Observations

Terminal Euthanasia (Dosing Phase)

Test Article (dosage) 1M 2M 3M 4M 1F 2F 3F 4F

‑‑‑‑‑‑‑‑‑‑‑‑‑‑‑‑‑‑‑‑‑‑‑‑‑‑‑ ‑‑‑‑‑‑‑‑ ‑‑ ‑‑ ‑‑ ‑‑ ‑‑ ‑‑ ‑‑ ‑‑

Benzonatate (PF‑00345410) mg/kg/day 0 10 30 90 0 5 15 50

‑‑‑‑‑‑‑‑‑‑‑‑‑‑‑‑‑‑‑‑‑‑‑‑‑‑‑‑‑‑‑‑‑‑‑‑‑‑‑‑‑‑‑‑‑‑‑‑‑‑‑‑‑‑‑‑‑‑‑‑‑‑‑‑‑‑‑‑‑‑‑‑‑‑‑‑‑‑‑‑‑‑‑‑‑‑‑‑‑‑‑‑‑‑‑‑‑‑‑‑‑‑‑‑‑‑‑‑

Tissue/ Group/Subgroup/Sex: 1/1/M 2/1/M 3/1/M 4/1/M 1/1/F 2/1/F 3/1/F 4/1/F

Observation Number of Animals:  33  24  31  28  25  23  24  30

‑‑‑‑‑‑‑‑‑‑‑‑‑‑‑‑‑‑‑‑‑‑‑‑‑‑‑‑‑‑‑‑‑‑‑‑‑‑‑‑‑‑‑‑‑‑‑‑‑‑‑‑‑‑‑‑‑‑‑‑‑‑‑‑‑‑‑‑‑‑‑‑‑‑‑‑‑‑‑‑‑‑‑‑‑‑‑‑‑‑‑‑‑‑‑‑‑‑‑‑‑‑‑‑‑‑‑‑

Uterus Number Examined:   0   0   0   0  25  23  24  30

Unremarkable:   0   0   0   0  15  14  15  23

Hyperplasia, endometrium

finding not present ‑   0   0   0   0  25  22  24  29

minimal 1   0   0   0   0   0   0   0   1

slight 2   0   0   0   0   0   1   0   0

Total Incidence:   0   0   0   0   0   1   0   1

Average Severity:   0.0   0.0   0.0   0.0   0.0   2.0   0.0   1.0

Inflammation, chronic‑active

finding not present ‑   0   0   0   0  25  23  24  29

slight 2   0   0   0   0   0   0   0   1

Total Incidence:   0   0   0   0   0   0   0   1

Average Severity:   0.0   0.0   0.0   0.0   0.0   0.0   0.0   2.0

Intussusception

finding not present ‑   0   0   0   0  25  22  24  30

moderate 3   0   0   0   0   0   1   0   0

Total Incidence:   0   0   0   0   0   1   0   0

Average Severity:   0.0   0.0   0.0   0.0   0.0   3.0   0.0   0.0

‑‑‑‑‑‑‑‑‑‑‑‑‑‑‑‑‑‑‑‑‑‑‑‑‑‑‑‑‑‑‑‑‑‑‑‑‑‑‑‑‑‑‑‑‑‑‑‑‑‑‑‑‑‑‑‑‑‑‑‑‑‑‑‑‑‑‑‑‑‑‑‑‑‑‑‑‑‑‑‑‑‑‑‑‑‑‑‑‑‑‑‑‑‑‑‑‑‑‑‑‑‑‑‑‑‑‑

Table

Summary of Severity for Selected Microscopic Observations

Terminal Euthanasia (Dosing Phase)

Test Article (dosage) 1M 2M 3M 4M 1F 2F 3F 4F

‑‑‑‑‑‑‑‑‑‑‑‑‑‑‑‑‑‑‑‑‑‑‑‑‑‑‑ ‑‑‑‑‑‑‑‑ ‑‑ ‑‑ ‑‑ ‑‑ ‑‑ ‑‑ ‑‑ ‑‑

Benzonatate (PF‑00345410) mg/kg/day 0 10 30 90 0 5 15 50

‑‑‑‑‑‑‑‑‑‑‑‑‑‑‑‑‑‑‑‑‑‑‑‑‑‑‑‑‑‑‑‑‑‑‑‑‑‑‑‑‑‑‑‑‑‑‑‑‑‑‑‑‑‑‑‑‑‑‑‑‑‑‑‑‑‑‑‑‑‑‑‑‑‑‑‑‑‑‑‑‑‑‑‑‑‑‑‑‑‑‑‑‑‑‑‑‑‑‑‑‑‑‑‑‑‑‑‑

Tissue/ Group/Subgroup/Sex: 1/1/M 2/1/M 3/1/M 4/1/M 1/1/F 2/1/F 3/1/F 4/1/F

Observation Number of Animals:  33  24  31  28  25  23  24  30

‑‑‑‑‑‑‑‑‑‑‑‑‑‑‑‑‑‑‑‑‑‑‑‑‑‑‑‑‑‑‑‑‑‑‑‑‑‑‑‑‑‑‑‑‑‑‑‑‑‑‑‑‑‑‑‑‑‑‑‑‑‑‑‑‑‑‑‑‑‑‑‑‑‑‑‑‑‑‑‑‑‑‑‑‑‑‑‑‑‑‑‑‑‑‑‑‑‑‑‑‑‑‑‑‑‑‑‑

Uterus Number Examined:   0   0   0   0  25  23  24  30

Unremarkable:   0   0   0   0  15  14  15  23

Lumen, debris, cellular

finding not present ‑   0   0   0   0  25  22  24  30

moderate 3   0   0   0   0   0   1   0   0

Total Incidence:   0   0   0   0   0   1   0   0

Average Severity:   0.0   0.0   0.0   0.0   0.0   3.0   0.0   0.0

‑‑‑‑‑‑‑‑‑‑‑‑‑‑‑‑‑‑‑‑‑‑‑‑‑‑‑‑‑‑‑‑‑‑‑‑‑‑‑‑‑‑‑‑‑‑‑‑‑‑‑‑‑‑‑‑‑‑‑‑‑‑‑‑‑‑‑‑‑‑‑‑‑‑‑‑‑‑‑‑‑‑‑‑‑‑‑‑‑‑‑‑‑‑‑‑‑‑‑‑‑‑‑‑‑‑‑

Table

Summary of Severity for Selected Microscopic Observations

Terminal Euthanasia (Dosing Phase)

Test Article (dosage) 1M 2M 3M 4M 1F 2F 3F 4F

‑‑‑‑‑‑‑‑‑‑‑‑‑‑‑‑‑‑‑‑‑‑‑‑‑‑‑ ‑‑‑‑‑‑‑‑ ‑‑ ‑‑ ‑‑ ‑‑ ‑‑ ‑‑ ‑‑ ‑‑

Benzonatate (PF‑00345410) mg/kg/day 0 10 30 90 0 5 15 50

‑‑‑‑‑‑‑‑‑‑‑‑‑‑‑‑‑‑‑‑‑‑‑‑‑‑‑‑‑‑‑‑‑‑‑‑‑‑‑‑‑‑‑‑‑‑‑‑‑‑‑‑‑‑‑‑‑‑‑‑‑‑‑‑‑‑‑‑‑‑‑‑‑‑‑‑‑‑‑‑‑‑‑‑‑‑‑‑‑‑‑‑‑‑‑‑‑‑‑‑‑‑‑‑‑‑‑‑

Tissue/ Group/Subgroup/Sex: 1/1/M 2/1/M 3/1/M 4/1/M 1/1/F 2/1/F 3/1/F 4/1/F

Observation Number of Animals:  33  24  31  28  25  23  24  30

‑‑‑‑‑‑‑‑‑‑‑‑‑‑‑‑‑‑‑‑‑‑‑‑‑‑‑‑‑‑‑‑‑‑‑‑‑‑‑‑‑‑‑‑‑‑‑‑‑‑‑‑‑‑‑‑‑‑‑‑‑‑‑‑‑‑‑‑‑‑‑‑‑‑‑‑‑‑‑‑‑‑‑‑‑‑‑‑‑‑‑‑‑‑‑‑‑‑‑‑‑‑‑‑‑‑‑‑

Vagina Number Examined:   0   0   0   0  25  23  24  30

Unremarkable:   0   0   0   0  16  14  15  13

Exudate, lumen

finding not present ‑   0   0   0   0  25  21  24  30

minimal 1   0   0   0   0   0   1   0   0

slight 2   0   0   0   0   0   1   0   0

Total Incidence:   0   0   0   0   0   2   0   0

Average Severity:   0.0   0.0   0.0   0.0   0.0   1.5   0.0   0.0

Mucification, epithelium

finding not present ‑   0   0   0   0  16  14  15  13

minimal 1   0   0   0   0   1   1   3   2

slight 2   0   0   0   0   5   5   2   9

moderate 3   0   0   0   0   3   2   3   6

marked 4   0   0   0   0   0   1   1   0

Total Incidence:   0   0   0   0   9   9   9  17

Average Severity:   0.0   0.0   0.0   0.0   2.2   2.3   2.2   2.2

‑‑‑‑‑‑‑‑‑‑‑‑‑‑‑‑‑‑‑‑‑‑‑‑‑‑‑‑‑‑‑‑‑‑‑‑‑‑‑‑‑‑‑‑‑‑‑‑‑‑‑‑‑‑‑‑‑‑‑‑‑‑‑‑‑‑‑‑‑‑‑‑‑‑‑‑‑‑‑‑‑‑‑‑‑‑‑‑‑‑‑‑‑‑‑‑‑‑‑‑‑‑‑‑‑‑‑

Table 5.8: Summary of Severity for Selected Microscopic Observations - Unscheduled Euthanasias and Deaths

Test Article (dosage) 1M 2M 3M 4M 1F 2F 3F 4F

‑‑‑‑‑‑‑‑‑‑‑‑‑‑‑‑‑‑‑‑‑‑‑‑‑‑‑ ‑‑‑‑‑‑‑‑ ‑‑ ‑‑ ‑‑ ‑‑ ‑‑ ‑‑ ‑‑ ‑‑

Benzonatate (PF‑00345410) mg/kg/day 0 10 30 90 0 5 15 50

‑‑‑‑‑‑‑‑‑‑‑‑‑‑‑‑‑‑‑‑‑‑‑‑‑‑‑‑‑‑‑‑‑‑‑‑‑‑‑‑‑‑‑‑‑‑‑‑‑‑‑‑‑‑‑‑‑‑‑‑‑‑‑‑‑‑‑‑‑‑‑‑‑‑‑‑‑‑‑‑‑‑‑‑‑‑‑‑‑‑‑‑‑‑‑‑‑‑‑‑‑‑‑‑‑‑‑‑

Tissue/ Group/Subgroup/Sex: 1/1/M 2/1/M 3/1/M 4/1/M 1/1/F 2/1/F 3/1/F 4/1/F

Observation Number of Animals:  22  26  19  27  30  27  26  25

‑‑‑‑‑‑‑‑‑‑‑‑‑‑‑‑‑‑‑‑‑‑‑‑‑‑‑‑‑‑‑‑‑‑‑‑‑‑‑‑‑‑‑‑‑‑‑‑‑‑‑‑‑‑‑‑‑‑‑‑‑‑‑‑‑‑‑‑‑‑‑‑‑‑‑‑‑‑‑‑‑‑‑‑‑‑‑‑‑‑‑‑‑‑‑‑‑‑‑‑‑‑‑‑‑‑‑‑

Abdominal Cavity Number Examined:   0   0   0   0   1   1   1   0

Unremarkable:   0   0   0   0   0   0   0   0

Hemorrhage

finding not present ‑   0   0   0   0   0   1   1   0

moderate 3   0   0   0   0   1   0   0   0

Total Incidence:   0   0   0   0   1   0   0   0

Average Severity:   0.0   0.0   0.0   0.0   3.0   0.0   0.0   0.0

Adipose, Other Number Examined:   0   0   0   0   1   0   0   3

Unremarkable:   0   0   0   0   0   0   0   1

Necrosis

finding not present ‑   0   0   0   0   1   0   0   2

moderate 3   0   0   0   0   0   0   0   1

Total Incidence:   0   0   0   0   0   0   0   1

Average Severity:   0.0   0.0   0.0   0.0   0.0   0.0   0.0   3.0

Adipose, White,

Mesenteric Number Examined: 0 0 0 1 0 0 0 0

Unremarkable: 0 0 0 0 0 0 0 0

‑‑‑‑‑‑‑‑‑‑‑‑‑‑‑‑‑‑‑‑‑‑‑‑‑‑‑‑‑‑‑‑‑‑‑‑‑‑‑‑‑‑‑‑‑‑‑‑‑‑‑‑‑‑‑‑‑‑‑‑‑‑‑‑‑‑‑‑‑‑‑‑‑‑‑‑‑‑‑‑‑‑‑‑‑‑‑‑‑‑‑‑‑‑‑‑‑‑‑‑‑‑‑‑‑‑‑

Table

Summary of Severity for Selected Microscopic Observations

Unscheduled Euthanasias and Deaths

Test Article (dosage) 1M 2M 3M 4M 1F 2F 3F 4F

‑‑‑‑‑‑‑‑‑‑‑‑‑‑‑‑‑‑‑‑‑‑‑‑‑‑‑ ‑‑‑‑‑‑‑‑ ‑‑ ‑‑ ‑‑ ‑‑ ‑‑ ‑‑ ‑‑ ‑‑

Benzonatate (PF‑00345410) mg/kg/day 0 10 30 90 0 5 15 50

‑‑‑‑‑‑‑‑‑‑‑‑‑‑‑‑‑‑‑‑‑‑‑‑‑‑‑‑‑‑‑‑‑‑‑‑‑‑‑‑‑‑‑‑‑‑‑‑‑‑‑‑‑‑‑‑‑‑‑‑‑‑‑‑‑‑‑‑‑‑‑‑‑‑‑‑‑‑‑‑‑‑‑‑‑‑‑‑‑‑‑‑‑‑‑‑‑‑‑‑‑‑‑‑‑‑‑‑

Tissue/ Group/Subgroup/Sex: 1/1/M 2/1/M 3/1/M 4/1/M 1/1/F 2/1/F 3/1/F 4/1/F

Observation Number of Animals:  22  26  19  27  30  27  26  25

‑‑‑‑‑‑‑‑‑‑‑‑‑‑‑‑‑‑‑‑‑‑‑‑‑‑‑‑‑‑‑‑‑‑‑‑‑‑‑‑‑‑‑‑‑‑‑‑‑‑‑‑‑‑‑‑‑‑‑‑‑‑‑‑‑‑‑‑‑‑‑‑‑‑‑‑‑‑‑‑‑‑‑‑‑‑‑‑‑‑‑‑‑‑‑‑‑‑‑‑‑‑‑‑‑‑‑‑

Adrenal, Cortex Number Examined:  22  25  19  27  30  27  26  25

Unremarkable:  12  11   6  14   3   3   3   1

Atrophy

finding not present ‑  22  25  19  27  30  27  26  24

moderate 3   0   0   0   0   0   0   0   1

Total Incidence:   0   0   0   0   0   0   0   1

Average Severity:   0.0   0.0   0.0   0.0   0.0   0.0   0.0   3.0

Degeneration, cystic/hemorrhagic

finding not present ‑  12  12   6  15   3   4   3   2

minimal 1   6   7  11  11   4   5   3   5

slight 2   3   6   2   0  11  11   7  10

moderate 3   1   0   0   1  10   4  11   7

marked 4   0   0   0   0   2   3   2   1

Total Incidence:  10  13  13  12  27  23  23  23

Average Severity:   1.5   1.5   1.2   1.2   2.4   2.2   2.5   2.2

Hematopoiesis, increased

finding not present ‑  22  25  19  27  30  27  26  24

slight 2   0   0   0   0   0   0   0   1

Total Incidence:   0   0   0   0   0   0   0   1

Average Severity:   0.0   0.0   0.0   0.0   0.0   0.0   0.0   2.0

‑‑‑‑‑‑‑‑‑‑‑‑‑‑‑‑‑‑‑‑‑‑‑‑‑‑‑‑‑‑‑‑‑‑‑‑‑‑‑‑‑‑‑‑‑‑‑‑‑‑‑‑‑‑‑‑‑‑‑‑‑‑‑‑‑‑‑‑‑‑‑‑‑‑‑‑‑‑‑‑‑‑‑‑‑‑‑‑‑‑‑‑‑‑‑‑‑‑‑‑‑‑‑‑‑‑‑

Table

Summary of Severity for Selected Microscopic Observations

Unscheduled Euthanasias and Deaths

Test Article (dosage) 1M 2M 3M 4M 1F 2F 3F 4F

‑‑‑‑‑‑‑‑‑‑‑‑‑‑‑‑‑‑‑‑‑‑‑‑‑‑‑ ‑‑‑‑‑‑‑‑ ‑‑ ‑‑ ‑‑ ‑‑ ‑‑ ‑‑ ‑‑ ‑‑

Benzonatate (PF‑00345410) mg/kg/day 0 10 30 90 0 5 15 50

‑‑‑‑‑‑‑‑‑‑‑‑‑‑‑‑‑‑‑‑‑‑‑‑‑‑‑‑‑‑‑‑‑‑‑‑‑‑‑‑‑‑‑‑‑‑‑‑‑‑‑‑‑‑‑‑‑‑‑‑‑‑‑‑‑‑‑‑‑‑‑‑‑‑‑‑‑‑‑‑‑‑‑‑‑‑‑‑‑‑‑‑‑‑‑‑‑‑‑‑‑‑‑‑‑‑‑‑

Tissue/ Group/Subgroup/Sex: 1/1/M 2/1/M 3/1/M 4/1/M 1/1/F 2/1/F 3/1/F 4/1/F

Observation Number of Animals:  22  26  19  27  30  27  26  25

‑‑‑‑‑‑‑‑‑‑‑‑‑‑‑‑‑‑‑‑‑‑‑‑‑‑‑‑‑‑‑‑‑‑‑‑‑‑‑‑‑‑‑‑‑‑‑‑‑‑‑‑‑‑‑‑‑‑‑‑‑‑‑‑‑‑‑‑‑‑‑‑‑‑‑‑‑‑‑‑‑‑‑‑‑‑‑‑‑‑‑‑‑‑‑‑‑‑‑‑‑‑‑‑‑‑‑‑

Adrenal, Cortex Number Examined:  22  25  19  27  30  27  26  25

Unremarkable:  12  11   6  14   3   3   3   1

Hyperplasia

finding not present ‑  22  24  19  26  30  25  26  24

minimal 1   0   0   0   0   0   1   0   0

slight 2   0   0   0   1   0   1   0   0

moderate 3   0   1   0   0   0   0   0   1

Total Incidence:   0   1   0   1   0   2   0   1

Average Severity:   0.0   3.0   0.0   2.0   0.0   1.5   0.0   3.0

Hypertrophy

finding not present ‑  22  23  17  27  27  27  25  23

minimal 1   0   0   0   0   1   0   0   0

slight 2   0   1   1   0   2   0   1   1

moderate 3   0   1   1   0   0   0   0   1

Total Incidence:   0   2   2   0   3   0   1   2

Average Severity:   0.0   2.5   2.5   0.0   1.7   0.0   2.0   2.5

Necrosis

finding not present ‑  22  24  19  27  30  27  26  25

slight 2   0   1   0   0   0   0   0   0

Total Incidence:   0   1   0   0   0   0   0   0

Average Severity:   0.0   2.0   0.0   0.0   0.0   0.0   0.0   0.0

‑‑‑‑‑‑‑‑‑‑‑‑‑‑‑‑‑‑‑‑‑‑‑‑‑‑‑‑‑‑‑‑‑‑‑‑‑‑‑‑‑‑‑‑‑‑‑‑‑‑‑‑‑‑‑‑‑‑‑‑‑‑‑‑‑‑‑‑‑‑‑‑‑‑‑‑‑‑‑‑‑‑‑‑‑‑‑‑‑‑‑‑‑‑‑‑‑‑‑‑‑‑‑‑‑‑‑

Table

Summary of Severity for Selected Microscopic Observations

Unscheduled Euthanasias and Deaths

Test Article (dosage) 1M 2M 3M 4M 1F 2F 3F 4F

‑‑‑‑‑‑‑‑‑‑‑‑‑‑‑‑‑‑‑‑‑‑‑‑‑‑‑ ‑‑‑‑‑‑‑‑ ‑‑ ‑‑ ‑‑ ‑‑ ‑‑ ‑‑ ‑‑ ‑‑

Benzonatate (PF‑00345410) mg/kg/day 0 10 30 90 0 5 15 50

‑‑‑‑‑‑‑‑‑‑‑‑‑‑‑‑‑‑‑‑‑‑‑‑‑‑‑‑‑‑‑‑‑‑‑‑‑‑‑‑‑‑‑‑‑‑‑‑‑‑‑‑‑‑‑‑‑‑‑‑‑‑‑‑‑‑‑‑‑‑‑‑‑‑‑‑‑‑‑‑‑‑‑‑‑‑‑‑‑‑‑‑‑‑‑‑‑‑‑‑‑‑‑‑‑‑‑‑

Tissue/ Group/Subgroup/Sex: 1/1/M 2/1/M 3/1/M 4/1/M 1/1/F 2/1/F 3/1/F 4/1/F

Observation Number of Animals:  22  26  19  27  30  27  26  25

‑‑‑‑‑‑‑‑‑‑‑‑‑‑‑‑‑‑‑‑‑‑‑‑‑‑‑‑‑‑‑‑‑‑‑‑‑‑‑‑‑‑‑‑‑‑‑‑‑‑‑‑‑‑‑‑‑‑‑‑‑‑‑‑‑‑‑‑‑‑‑‑‑‑‑‑‑‑‑‑‑‑‑‑‑‑‑‑‑‑‑‑‑‑‑‑‑‑‑‑‑‑‑‑‑‑‑‑

Adrenal, Medulla Number Examined:  22  25  19  27  30  27  26  25

Unremarkable:  22  24  18  26  30  27  25  25

Infiltrate, mononuclear cell

finding not present ‑  22  25  19  26  30  27  25  25

minimal 1   0   0   0   1   0   0   0   0

slight 2   0   0   0   0   0   0   1   0

Total Incidence:   0   0   0   1   0   0   1   0

Average Severity:   0.0   0.0   0.0   1.0   0.0   0.0   2.0   0.0

Aorta Number Examined:  22  26  19  27  30  27  26  25

Unremarkable:  22  25  19  27  30  27  26  25

Mineralization

finding not present ‑  22  25  19  27  30  27  26  25

slight 2   0   1   0   0   0   0   0   0

Total Incidence:   0   1   0   0   0   0   0   0

Average Severity:   0.0   2.0   0.0   0.0   0.0   0.0   0.0   0.0

Body, Whole/Cavity Number Examined:  22  26  19  27  30  27  26  25

Unremarkable:  20  20  15  19  27  24  21  21

Bone, Other Number Examined:   1   0   0   0   0   0   0   0

Unremarkable:   1   0   0   0   0   0   0   0

‑‑‑‑‑‑‑‑‑‑‑‑‑‑‑‑‑‑‑‑‑‑‑‑‑‑‑‑‑‑‑‑‑‑‑‑‑‑‑‑‑‑‑‑‑‑‑‑‑‑‑‑‑‑‑‑‑‑‑‑‑‑‑‑‑‑‑‑‑‑‑‑‑‑‑‑‑‑‑‑‑‑‑‑‑‑‑‑‑‑‑‑‑‑‑‑‑‑‑‑‑‑‑‑‑‑‑

Table

Summary of Severity for Selected Microscopic Observations

Unscheduled Euthanasias and Deaths

Test Article (dosage) 1M 2M 3M 4M 1F 2F 3F 4F

‑‑‑‑‑‑‑‑‑‑‑‑‑‑‑‑‑‑‑‑‑‑‑‑‑‑‑ ‑‑‑‑‑‑‑‑ ‑‑ ‑‑ ‑‑ ‑‑ ‑‑ ‑‑ ‑‑ ‑‑

Benzonatate (PF‑00345410) mg/kg/day 0 10 30 90 0 5 15 50

‑‑‑‑‑‑‑‑‑‑‑‑‑‑‑‑‑‑‑‑‑‑‑‑‑‑‑‑‑‑‑‑‑‑‑‑‑‑‑‑‑‑‑‑‑‑‑‑‑‑‑‑‑‑‑‑‑‑‑‑‑‑‑‑‑‑‑‑‑‑‑‑‑‑‑‑‑‑‑‑‑‑‑‑‑‑‑‑‑‑‑‑‑‑‑‑‑‑‑‑‑‑‑‑‑‑‑‑

Tissue/ Group/Subgroup/Sex: 1/1/M 2/1/M 3/1/M 4/1/M 1/1/F 2/1/F 3/1/F 4/1/F

Observation Number of Animals:  22  26  19  27  30  27  26  25

‑‑‑‑‑‑‑‑‑‑‑‑‑‑‑‑‑‑‑‑‑‑‑‑‑‑‑‑‑‑‑‑‑‑‑‑‑‑‑‑‑‑‑‑‑‑‑‑‑‑‑‑‑‑‑‑‑‑‑‑‑‑‑‑‑‑‑‑‑‑‑‑‑‑‑‑‑‑‑‑‑‑‑‑‑‑‑‑‑‑‑‑‑‑‑‑‑‑‑‑‑‑‑‑‑‑‑‑

Brain Number Examined:  22  26  19  27  30  27  26  25

Unremarkable:  10  15  11  14  11  10  10   9

Compression, ventral

finding not present ‑  14  16  11  19  11  10  10   9

minimal 1   0   2   2   1   4   3   4   2

slight 2   7   8   5   6  13  11  12  11

moderate 3   1   0   1   1   2   3   0   3

Total Incidence:   8  10   8   8  19  17  16  16

Average Severity:   2.1   1.8   1.9   2.0   1.9   2.0   1.8   2.1

Gliosis

finding not present ‑  22  26  19  26  30  26  26  25

slight 2   0   0   0   1   0   0   0   0

moderate 3   0   0   0   0   0   1   0   0

Total Incidence:   0   0   0   1   0   1   0   0

Average Severity:   0.0   0.0   0.0   2.0   0.0   3.0   0.0   0.0

Hemorrhage

finding not present ‑  21  26  19  27  30  27  26  25

minimal 1   1   0   0   0   0   0   0   0

Total Incidence:   1   0   0   0   0   0   0   0

Average Severity:   1.0   0.0   0.0   0.0   0.0   0.0   0.0   0.0

‑‑‑‑‑‑‑‑‑‑‑‑‑‑‑‑‑‑‑‑‑‑‑‑‑‑‑‑‑‑‑‑‑‑‑‑‑‑‑‑‑‑‑‑‑‑‑‑‑‑‑‑‑‑‑‑‑‑‑‑‑‑‑‑‑‑‑‑‑‑‑‑‑‑‑‑‑‑‑‑‑‑‑‑‑‑‑‑‑‑‑‑‑‑‑‑‑‑‑‑‑‑‑‑‑‑‑

Table

Summary of Severity for Selected Microscopic Observations

Unscheduled Euthanasias and Deaths

Test Article (dosage) 1M 2M 3M 4M 1F 2F 3F 4F

‑‑‑‑‑‑‑‑‑‑‑‑‑‑‑‑‑‑‑‑‑‑‑‑‑‑‑ ‑‑‑‑‑‑‑‑ ‑‑ ‑‑ ‑‑ ‑‑ ‑‑ ‑‑ ‑‑ ‑‑

Benzonatate (PF‑00345410) mg/kg/day 0 10 30 90 0 5 15 50

‑‑‑‑‑‑‑‑‑‑‑‑‑‑‑‑‑‑‑‑‑‑‑‑‑‑‑‑‑‑‑‑‑‑‑‑‑‑‑‑‑‑‑‑‑‑‑‑‑‑‑‑‑‑‑‑‑‑‑‑‑‑‑‑‑‑‑‑‑‑‑‑‑‑‑‑‑‑‑‑‑‑‑‑‑‑‑‑‑‑‑‑‑‑‑‑‑‑‑‑‑‑‑‑‑‑‑‑

Tissue/ Group/Subgroup/Sex: 1/1/M 2/1/M 3/1/M 4/1/M 1/1/F 2/1/F 3/1/F 4/1/F

Observation Number of Animals:  22  26  19  27  30  27  26  25

‑‑‑‑‑‑‑‑‑‑‑‑‑‑‑‑‑‑‑‑‑‑‑‑‑‑‑‑‑‑‑‑‑‑‑‑‑‑‑‑‑‑‑‑‑‑‑‑‑‑‑‑‑‑‑‑‑‑‑‑‑‑‑‑‑‑‑‑‑‑‑‑‑‑‑‑‑‑‑‑‑‑‑‑‑‑‑‑‑‑‑‑‑‑‑‑‑‑‑‑‑‑‑‑‑‑‑‑

Brain Number Examined:  22  26  19  27  30  27  26  25

Unremarkable:  10  15  11  14  11  10  10   9

Necrosis, gray matter

finding not present ‑  22  26  19  26  30  26  26  25

minimal 1   0   0   0   1   0   0   0   0

slight 2   0   0   0   0   0   1   0   0

Total Incidence:   0   0   0   1   0   1   0   0

Average Severity:   0.0   0.0   0.0   1.0   0.0   2.0   0.0   0.0

Necrosis/loss, neurons

finding not present ‑  22  25  19  27  30  27  26  25

minimal 1   0   1   0   0   0   0   0   0

Total Incidence:   0   1   0   0   0   0   0   0

Average Severity:   0.0   1.0   0.0   0.0   0.0   0.0   0.0   0.0

Vacuoles, white matter

finding not present ‑  21  26  19  27  30  27  26  25

slight 2   1   0   0   0   0   0   0   0

Total Incidence:   1   0   0   0   0   0   0   0

Average Severity:   2.0   0.0   0.0   0.0   0.0   0.0   0.0   0.0

‑‑‑‑‑‑‑‑‑‑‑‑‑‑‑‑‑‑‑‑‑‑‑‑‑‑‑‑‑‑‑‑‑‑‑‑‑‑‑‑‑‑‑‑‑‑‑‑‑‑‑‑‑‑‑‑‑‑‑‑‑‑‑‑‑‑‑‑‑‑‑‑‑‑‑‑‑‑‑‑‑‑‑‑‑‑‑‑‑‑‑‑‑‑‑‑‑‑‑‑‑‑‑‑‑‑‑

Table

Summary of Severity for Selected Microscopic Observations

Unscheduled Euthanasias and Deaths

Test Article (dosage) 1M 2M 3M 4M 1F 2F 3F 4F

‑‑‑‑‑‑‑‑‑‑‑‑‑‑‑‑‑‑‑‑‑‑‑‑‑‑‑ ‑‑‑‑‑‑‑‑ ‑‑ ‑‑ ‑‑ ‑‑ ‑‑ ‑‑ ‑‑ ‑‑

Benzonatate (PF‑00345410) mg/kg/day 0 10 30 90 0 5 15 50

‑‑‑‑‑‑‑‑‑‑‑‑‑‑‑‑‑‑‑‑‑‑‑‑‑‑‑‑‑‑‑‑‑‑‑‑‑‑‑‑‑‑‑‑‑‑‑‑‑‑‑‑‑‑‑‑‑‑‑‑‑‑‑‑‑‑‑‑‑‑‑‑‑‑‑‑‑‑‑‑‑‑‑‑‑‑‑‑‑‑‑‑‑‑‑‑‑‑‑‑‑‑‑‑‑‑‑‑

Tissue/ Group/Subgroup/Sex: 1/1/M 2/1/M 3/1/M 4/1/M 1/1/F 2/1/F 3/1/F 4/1/F

Observation Number of Animals:  22  26  19  27  30  27  26  25

‑‑‑‑‑‑‑‑‑‑‑‑‑‑‑‑‑‑‑‑‑‑‑‑‑‑‑‑‑‑‑‑‑‑‑‑‑‑‑‑‑‑‑‑‑‑‑‑‑‑‑‑‑‑‑‑‑‑‑‑‑‑‑‑‑‑‑‑‑‑‑‑‑‑‑‑‑‑‑‑‑‑‑‑‑‑‑‑‑‑‑‑‑‑‑‑‑‑‑‑‑‑‑‑‑‑‑‑

Cecum Number Examined:  22  25  19  25  30  25  26  25

Unremarkable:  22  25  19  25  30  25  26  24

Erosion/ulcer

finding not present ‑  22  25  19  25  30  25  26  24

moderate 3   0   0   0   0   0   0   0   1

Total Incidence:   0   0   0   0   0   0   0   1

Average Severity:   0.0   0.0   0.0   0.0   0.0   0.0   0.0   3.0

‑‑‑‑‑‑‑‑‑‑‑‑‑‑‑‑‑‑‑‑‑‑‑‑‑‑‑‑‑‑‑‑‑‑‑‑‑‑‑‑‑‑‑‑‑‑‑‑‑‑‑‑‑‑‑‑‑‑‑‑‑‑‑‑‑‑‑‑‑‑‑‑‑‑‑‑‑‑‑‑‑‑‑‑‑‑‑‑‑‑‑‑‑‑‑‑‑‑‑‑‑‑‑‑‑‑‑

Table

Summary of Severity for Selected Microscopic Observations

Unscheduled Euthanasias and Deaths

Test Article (dosage) 1M 2M 3M 4M 1F 2F 3F 4F

‑‑‑‑‑‑‑‑‑‑‑‑‑‑‑‑‑‑‑‑‑‑‑‑‑‑‑ ‑‑‑‑‑‑‑‑ ‑‑ ‑‑ ‑‑ ‑‑ ‑‑ ‑‑ ‑‑ ‑‑

Benzonatate (PF‑00345410) mg/kg/day 0 10 30 90 0 5 15 50

‑‑‑‑‑‑‑‑‑‑‑‑‑‑‑‑‑‑‑‑‑‑‑‑‑‑‑‑‑‑‑‑‑‑‑‑‑‑‑‑‑‑‑‑‑‑‑‑‑‑‑‑‑‑‑‑‑‑‑‑‑‑‑‑‑‑‑‑‑‑‑‑‑‑‑‑‑‑‑‑‑‑‑‑‑‑‑‑‑‑‑‑‑‑‑‑‑‑‑‑‑‑‑‑‑‑‑‑

Tissue/ Group/Subgroup/Sex: 1/1/M 2/1/M 3/1/M 4/1/M 1/1/F 2/1/F 3/1/F 4/1/F

Observation Number of Animals:  22  26  19  27  30  27  26  25

‑‑‑‑‑‑‑‑‑‑‑‑‑‑‑‑‑‑‑‑‑‑‑‑‑‑‑‑‑‑‑‑‑‑‑‑‑‑‑‑‑‑‑‑‑‑‑‑‑‑‑‑‑‑‑‑‑‑‑‑‑‑‑‑‑‑‑‑‑‑‑‑‑‑‑‑‑‑‑‑‑‑‑‑‑‑‑‑‑‑‑‑‑‑‑‑‑‑‑‑‑‑‑‑‑‑‑‑

Cervix Number Examined:   0   0   0   0  30  27  26  25

Unremarkable:   0   0   0   0  25  21  21  21

Cyst

finding not present ‑   0   0   0   0  30  26  26  25

slight 2   0   0   0   0   0   1   0   0

Total Incidence:   0   0   0   0   0   1   0   0

Average Severity:   0.0   0.0   0.0   0.0   0.0   2.0   0.0   0.0

Hyperplasia, epithelium

finding not present ‑   0   0   0   0  28  26  26  23

minimal 1   0   0   0   0   1   0   0   1

slight 2   0   0   0   0   1   0   0   1

moderate 3   0   0   0   0   0   1   0   0

Total Incidence:   0   0   0   0   2   1   0   2

Average Severity:   0.0   0.0   0.0   0.0   1.5   3.0   0.0   1.5

Lumen, exudate/debris

finding not present ‑   0   0   0   0  27  26  26  25

minimal 1   0   0   0   0   2   0   0   0

slight 2   0   0   0   0   1   1   0   0

Total Incidence:   0   0   0   0   3   1   0   0

Average Severity:   0.0   0.0   0.0   0.0   1.3   2.0   0.0   0.0

‑‑‑‑‑‑‑‑‑‑‑‑‑‑‑‑‑‑‑‑‑‑‑‑‑‑‑‑‑‑‑‑‑‑‑‑‑‑‑‑‑‑‑‑‑‑‑‑‑‑‑‑‑‑‑‑‑‑‑‑‑‑‑‑‑‑‑‑‑‑‑‑‑‑‑‑‑‑‑‑‑‑‑‑‑‑‑‑‑‑‑‑‑‑‑‑‑‑‑‑‑‑‑‑‑‑‑

Table

Summary of Severity for Selected Microscopic Observations

Unscheduled Euthanasias and Deaths

Test Article (dosage) 1M 2M 3M 4M 1F 2F 3F 4F

‑‑‑‑‑‑‑‑‑‑‑‑‑‑‑‑‑‑‑‑‑‑‑‑‑‑‑ ‑‑‑‑‑‑‑‑ ‑‑ ‑‑ ‑‑ ‑‑ ‑‑ ‑‑ ‑‑ ‑‑

Benzonatate (PF‑00345410) mg/kg/day 0 10 30 90 0 5 15 50

‑‑‑‑‑‑‑‑‑‑‑‑‑‑‑‑‑‑‑‑‑‑‑‑‑‑‑‑‑‑‑‑‑‑‑‑‑‑‑‑‑‑‑‑‑‑‑‑‑‑‑‑‑‑‑‑‑‑‑‑‑‑‑‑‑‑‑‑‑‑‑‑‑‑‑‑‑‑‑‑‑‑‑‑‑‑‑‑‑‑‑‑‑‑‑‑‑‑‑‑‑‑‑‑‑‑‑‑

Tissue/ Group/Subgroup/Sex: 1/1/M 2/1/M 3/1/M 4/1/M 1/1/F 2/1/F 3/1/F 4/1/F

Observation Number of Animals:  22  26  19  27  30  27  26  25

‑‑‑‑‑‑‑‑‑‑‑‑‑‑‑‑‑‑‑‑‑‑‑‑‑‑‑‑‑‑‑‑‑‑‑‑‑‑‑‑‑‑‑‑‑‑‑‑‑‑‑‑‑‑‑‑‑‑‑‑‑‑‑‑‑‑‑‑‑‑‑‑‑‑‑‑‑‑‑‑‑‑‑‑‑‑‑‑‑‑‑‑‑‑‑‑‑‑‑‑‑‑‑‑‑‑‑‑

Clitoral Gland Number Examined:   0   0   0   0   1   1   0   3

Unremarkable:   0   0   0   0   0   0   0   1

Inflammation/cyst

finding not present ‑   0   0   0   0   0   1   0   1

slight 2   0   0   0   0   1   0   0   1

moderate 3   0   0   0   0   0   0   0   1

Total Incidence:   0   0   0   0   1   0   0   2

Average Severity:   0.0   0.0   0.0   0.0   2.0   0.0   0.0   2.5

Colon Number Examined:  22  26  19  27  30  27  26  25

Unremarkable:  22  26  19  26  28  27  26  25

Parasite, nematode

finding not present ‑  22  26  19  26  29  27  26  25

Present   0   0   0   1   1   0   0   0

‑‑‑‑‑‑‑‑‑‑‑‑‑‑‑‑‑‑‑‑‑‑‑‑‑‑‑‑‑‑‑‑‑‑‑‑‑‑‑‑‑‑‑‑‑‑‑‑‑‑‑‑‑‑‑‑‑‑‑‑‑‑‑‑‑‑‑‑‑‑‑‑‑‑‑‑‑‑‑‑‑‑‑‑‑‑‑‑‑‑‑‑‑‑‑‑‑‑‑‑‑‑‑‑‑‑‑

Table

Summary of Severity for Selected Microscopic Observations

Unscheduled Euthanasias and Deaths

Test Article (dosage) 1M 2M 3M 4M 1F 2F 3F 4F

‑‑‑‑‑‑‑‑‑‑‑‑‑‑‑‑‑‑‑‑‑‑‑‑‑‑‑ ‑‑‑‑‑‑‑‑ ‑‑ ‑‑ ‑‑ ‑‑ ‑‑ ‑‑ ‑‑ ‑‑

Benzonatate (PF‑00345410) mg/kg/day 0 10 30 90 0 5 15 50

‑‑‑‑‑‑‑‑‑‑‑‑‑‑‑‑‑‑‑‑‑‑‑‑‑‑‑‑‑‑‑‑‑‑‑‑‑‑‑‑‑‑‑‑‑‑‑‑‑‑‑‑‑‑‑‑‑‑‑‑‑‑‑‑‑‑‑‑‑‑‑‑‑‑‑‑‑‑‑‑‑‑‑‑‑‑‑‑‑‑‑‑‑‑‑‑‑‑‑‑‑‑‑‑‑‑‑‑

Tissue/ Group/Subgroup/Sex: 1/1/M 2/1/M 3/1/M 4/1/M 1/1/F 2/1/F 3/1/F 4/1/F

Observation Number of Animals:  22  26  19  27  30  27  26  25

‑‑‑‑‑‑‑‑‑‑‑‑‑‑‑‑‑‑‑‑‑‑‑‑‑‑‑‑‑‑‑‑‑‑‑‑‑‑‑‑‑‑‑‑‑‑‑‑‑‑‑‑‑‑‑‑‑‑‑‑‑‑‑‑‑‑‑‑‑‑‑‑‑‑‑‑‑‑‑‑‑‑‑‑‑‑‑‑‑‑‑‑‑‑‑‑‑‑‑‑‑‑‑‑‑‑‑‑

Death Comment Number Examined:  22  26  19  27  30  27  26  25

Unremarkable:   0   0   0   0   0   0   0   0

Accidental

finding not present ‑  21  26  19  27  29  27  26  25

Present   1   0   0   0   1   0   0   0

Chronic anemia

finding not present ‑  22  26  19  27  30  26  26  25

Present   0   0   0   0   0   1   0   0

Degeneration, peripheral nerve

finding not present ‑  22  26  19  26  30  27  26  25

Present   0   0   0   1   0   0   0   0

Heart failure

finding not present ‑  22  25  19  27  30  27  26  25

Present   0   1   0   0   0   0   0   0

Hematopoietic neoplasm

finding not present ‑  21  23  19  24  29  26  25  21

Present   1   3   0   3   1   1   1   4

Inflammation

finding not present ‑  19  23  13  22  29  25  22  23

Present   3   3   6   5   1   2   4   2

Malacia, central nervous system

finding not present ‑  21  26  19  27  30  27  26  25

Present   1   0   0   0   0   0   0   0

Mesothelioma

finding not present ‑  22  26  18  27  30  27  26  25

Present   0   0   1   0   0   0   0   0

‑‑‑‑‑‑‑‑‑‑‑‑‑‑‑‑‑‑‑‑‑‑‑‑‑‑‑‑‑‑‑‑‑‑‑‑‑‑‑‑‑‑‑‑‑‑‑‑‑‑‑‑‑‑‑‑‑‑‑‑‑‑‑‑‑‑‑‑‑‑‑‑‑‑‑‑‑‑‑‑‑‑‑‑‑‑‑‑‑‑‑‑‑‑‑‑‑‑‑‑‑‑‑‑‑‑‑

Table

Summary of Severity for Selected Microscopic Observations

Unscheduled Euthanasias and Deaths

Test Article (dosage) 1M 2M 3M 4M 1F 2F 3F 4F

‑‑‑‑‑‑‑‑‑‑‑‑‑‑‑‑‑‑‑‑‑‑‑‑‑‑‑ ‑‑‑‑‑‑‑‑ ‑‑ ‑‑ ‑‑ ‑‑ ‑‑ ‑‑ ‑‑ ‑‑

Benzonatate (PF‑00345410) mg/kg/day 0 10 30 90 0 5 15 50

‑‑‑‑‑‑‑‑‑‑‑‑‑‑‑‑‑‑‑‑‑‑‑‑‑‑‑‑‑‑‑‑‑‑‑‑‑‑‑‑‑‑‑‑‑‑‑‑‑‑‑‑‑‑‑‑‑‑‑‑‑‑‑‑‑‑‑‑‑‑‑‑‑‑‑‑‑‑‑‑‑‑‑‑‑‑‑‑‑‑‑‑‑‑‑‑‑‑‑‑‑‑‑‑‑‑‑‑

Tissue/ Group/Subgroup/Sex: 1/1/M 2/1/M 3/1/M 4/1/M 1/1/F 2/1/F 3/1/F 4/1/F

Observation Number of Animals:  22  26  19  27  30  27  26  25

‑‑‑‑‑‑‑‑‑‑‑‑‑‑‑‑‑‑‑‑‑‑‑‑‑‑‑‑‑‑‑‑‑‑‑‑‑‑‑‑‑‑‑‑‑‑‑‑‑‑‑‑‑‑‑‑‑‑‑‑‑‑‑‑‑‑‑‑‑‑‑‑‑‑‑‑‑‑‑‑‑‑‑‑‑‑‑‑‑‑‑‑‑‑‑‑‑‑‑‑‑‑‑‑‑‑‑‑

Death Comment Number Examined:  22  26  19  27  30  27  26  25

Unremarkable:   0   0   0   0   0   0   0   0

Neoplasia, abdominal cavity

finding not present ‑  22  26  19  26  30  27  26  25

Present   0   0   0   1   0   0   0   0

Neoplasia, alimentary

finding not present ‑  21  25  18  27  30  27  26  25

Present   1   1   1   0   0   0   0   0

Neoplasia, endocrine

finding not present ‑  22  26  19  27  29  27  26  25

Present   0   0   0   0   1   0   0   0

Neoplasia, mammary

finding not present ‑  22  26  19  27  27  21  24  22

Present   0   0   0   0   3   6   2   3

Neoplasia, nervous system

finding not present ‑  20  24  19  24  30  27  26  25

Present   2   2   0   3   0   0   0   0

Neoplasia, pituitary

finding not present ‑  14  16  12  22  12  17  13  13

Present   8  10   7   5  18  10  13  12

Neoplasia, reproductive/urinary

finding not present ‑  22  26  19  27  26  24  21  24

Present   0   0   0   0   4   3   5   1

Neoplasia, skeletal

finding not present ‑  22  26  17  27  30  27  26  25

Present   0   0   2   0   0   0   0   0

‑‑‑‑‑‑‑‑‑‑‑‑‑‑‑‑‑‑‑‑‑‑‑‑‑‑‑‑‑‑‑‑‑‑‑‑‑‑‑‑‑‑‑‑‑‑‑‑‑‑‑‑‑‑‑‑‑‑‑‑‑‑‑‑‑‑‑‑‑‑‑‑‑‑‑‑‑‑‑‑‑‑‑‑‑‑‑‑‑‑‑‑‑‑‑‑‑‑‑‑‑‑‑‑‑‑‑

Table

Summary of Severity for Selected Microscopic Observations

Unscheduled Euthanasias and Deaths

Test Article (dosage) 1M 2M 3M 4M 1F 2F 3F 4F

‑‑‑‑‑‑‑‑‑‑‑‑‑‑‑‑‑‑‑‑‑‑‑‑‑‑‑ ‑‑‑‑‑‑‑‑ ‑‑ ‑‑ ‑‑ ‑‑ ‑‑ ‑‑ ‑‑ ‑‑

Benzonatate (PF‑00345410) mg/kg/day 0 10 30 90 0 5 15 50

‑‑‑‑‑‑‑‑‑‑‑‑‑‑‑‑‑‑‑‑‑‑‑‑‑‑‑‑‑‑‑‑‑‑‑‑‑‑‑‑‑‑‑‑‑‑‑‑‑‑‑‑‑‑‑‑‑‑‑‑‑‑‑‑‑‑‑‑‑‑‑‑‑‑‑‑‑‑‑‑‑‑‑‑‑‑‑‑‑‑‑‑‑‑‑‑‑‑‑‑‑‑‑‑‑‑‑‑

Tissue/ Group/Subgroup/Sex: 1/1/M 2/1/M 3/1/M 4/1/M 1/1/F 2/1/F 3/1/F 4/1/F

Observation Number of Animals:  22  26  19  27  30  27  26  25

‑‑‑‑‑‑‑‑‑‑‑‑‑‑‑‑‑‑‑‑‑‑‑‑‑‑‑‑‑‑‑‑‑‑‑‑‑‑‑‑‑‑‑‑‑‑‑‑‑‑‑‑‑‑‑‑‑‑‑‑‑‑‑‑‑‑‑‑‑‑‑‑‑‑‑‑‑‑‑‑‑‑‑‑‑‑‑‑‑‑‑‑‑‑‑‑‑‑‑‑‑‑‑‑‑‑‑‑

Death Comment Number Examined:  22  26  19  27  30  27  26  25

Unremarkable:   0   0   0   0   0   0   0   0

Neoplasia, skin

finding not present ‑  20  23  18  23  29  26  25  25

Present   2   3   1   4   1   1   1   0

Neoplasm, vascular

finding not present ‑  21  26  19  26  30  26  26  25

Present   1   0   0   1   0   1   0   0

Undetermined

finding not present ‑  20  23  18  23  30  25  26  22

Present   2   3   1   4   0   2   0   3

Duodenum Number Examined:  21  24  19  26  30  25  26  25

Unremarkable:  21  24  18  26  30  25  26  25

Ulcer

finding not present ‑  21  24  18  26  30  25  26  25

slight 2   0   0   1   0   0   0   0   0

Total Incidence:   0   0   1   0   0   0   0   0

Average Severity:   0.0   0.0   2.0   0.0   0.0   0.0   0.0   0.0

‑‑‑‑‑‑‑‑‑‑‑‑‑‑‑‑‑‑‑‑‑‑‑‑‑‑‑‑‑‑‑‑‑‑‑‑‑‑‑‑‑‑‑‑‑‑‑‑‑‑‑‑‑‑‑‑‑‑‑‑‑‑‑‑‑‑‑‑‑‑‑‑‑‑‑‑‑‑‑‑‑‑‑‑‑‑‑‑‑‑‑‑‑‑‑‑‑‑‑‑‑‑‑‑‑‑‑

Table

Summary of Severity for Selected Microscopic Observations

Unscheduled Euthanasias and Deaths

Test Article (dosage) 1M 2M 3M 4M 1F 2F 3F 4F

‑‑‑‑‑‑‑‑‑‑‑‑‑‑‑‑‑‑‑‑‑‑‑‑‑‑‑ ‑‑‑‑‑‑‑‑ ‑‑ ‑‑ ‑‑ ‑‑ ‑‑ ‑‑ ‑‑ ‑‑

Benzonatate (PF‑00345410) mg/kg/day 0 10 30 90 0 5 15 50

‑‑‑‑‑‑‑‑‑‑‑‑‑‑‑‑‑‑‑‑‑‑‑‑‑‑‑‑‑‑‑‑‑‑‑‑‑‑‑‑‑‑‑‑‑‑‑‑‑‑‑‑‑‑‑‑‑‑‑‑‑‑‑‑‑‑‑‑‑‑‑‑‑‑‑‑‑‑‑‑‑‑‑‑‑‑‑‑‑‑‑‑‑‑‑‑‑‑‑‑‑‑‑‑‑‑‑‑

Tissue/ Group/Subgroup/Sex: 1/1/M 2/1/M 3/1/M 4/1/M 1/1/F 2/1/F 3/1/F 4/1/F

Observation Number of Animals:  22  26  19  27  30  27  26  25

‑‑‑‑‑‑‑‑‑‑‑‑‑‑‑‑‑‑‑‑‑‑‑‑‑‑‑‑‑‑‑‑‑‑‑‑‑‑‑‑‑‑‑‑‑‑‑‑‑‑‑‑‑‑‑‑‑‑‑‑‑‑‑‑‑‑‑‑‑‑‑‑‑‑‑‑‑‑‑‑‑‑‑‑‑‑‑‑‑‑‑‑‑‑‑‑‑‑‑‑‑‑‑‑‑‑‑‑

Epididymis Number Examined:  22  26  19  27   0   0   0   0

Unremarkable:  20  24  19  27   0   0   0   0

Granuloma, sperm

finding not present ‑  22  25  19  27   0   0   0   0

moderate 3   0   1   0   0   0   0   0   0

Total Incidence:   0   1   0   0   0   0   0   0

Average Severity:   0.0   3.0   0.0   0.0   0.0   0.0   0.0   0.0

Hypospermia

finding not present ‑  20  25  19  27   0   0   0   0

slight 2   1   0   0   0   0   0   0   0

moderate 3   1   0   0   0   0   0   0   0

marked 4   0   1   0   0   0   0   0   0

Total Incidence:   2   1   0   0   0   0   0   0

Average Severity:   2.5   4.0   0.0   0.0   0.0   0.0   0.0   0.0

‑‑‑‑‑‑‑‑‑‑‑‑‑‑‑‑‑‑‑‑‑‑‑‑‑‑‑‑‑‑‑‑‑‑‑‑‑‑‑‑‑‑‑‑‑‑‑‑‑‑‑‑‑‑‑‑‑‑‑‑‑‑‑‑‑‑‑‑‑‑‑‑‑‑‑‑‑‑‑‑‑‑‑‑‑‑‑‑‑‑‑‑‑‑‑‑‑‑‑‑‑‑‑‑‑‑‑

Table

Summary of Severity for Selected Microscopic Observations

Unscheduled Euthanasias and Deaths

Test Article (dosage) 1M 2M 3M 4M 1F 2F 3F 4F

‑‑‑‑‑‑‑‑‑‑‑‑‑‑‑‑‑‑‑‑‑‑‑‑‑‑‑ ‑‑‑‑‑‑‑‑ ‑‑ ‑‑ ‑‑ ‑‑ ‑‑ ‑‑ ‑‑ ‑‑

Benzonatate (PF‑00345410) mg/kg/day 0 10 30 90 0 5 15 50

‑‑‑‑‑‑‑‑‑‑‑‑‑‑‑‑‑‑‑‑‑‑‑‑‑‑‑‑‑‑‑‑‑‑‑‑‑‑‑‑‑‑‑‑‑‑‑‑‑‑‑‑‑‑‑‑‑‑‑‑‑‑‑‑‑‑‑‑‑‑‑‑‑‑‑‑‑‑‑‑‑‑‑‑‑‑‑‑‑‑‑‑‑‑‑‑‑‑‑‑‑‑‑‑‑‑‑‑

Tissue/ Group/Subgroup/Sex: 1/1/M 2/1/M 3/1/M 4/1/M 1/1/F 2/1/F 3/1/F 4/1/F

Observation Number of Animals:  22  26  19  27  30  27  26  25

‑‑‑‑‑‑‑‑‑‑‑‑‑‑‑‑‑‑‑‑‑‑‑‑‑‑‑‑‑‑‑‑‑‑‑‑‑‑‑‑‑‑‑‑‑‑‑‑‑‑‑‑‑‑‑‑‑‑‑‑‑‑‑‑‑‑‑‑‑‑‑‑‑‑‑‑‑‑‑‑‑‑‑‑‑‑‑‑‑‑‑‑‑‑‑‑‑‑‑‑‑‑‑‑‑‑‑‑

Esophagus Number Examined:  22  26  19  27  30  27  26  25

Unremarkable:  21  24  19  27  29  25  26  25

Degeneration/regeneration,

muscularis

finding not present ‑  21  24  19  27  29  25  26  25

minimal 1   1   2   0   0   0   1   0   0

slight 2   0   0   0   0   0   1   0   0

marked 4   0   0   0   0   1   0   0   0

Total Incidence:   1   2   0   0   1   2   0   0

Average Severity:   1.0   1.0   0.0   0.0   4.0   1.5   0.0   0.0

Inflammation, chronic‑active

finding not present ‑  22  26  19  27  29  26  26  25

slight 2   0   0   0   0   0   1   0   0

marked 4   0   0   0   0   1   0   0   0

Total Incidence:   0   0   0   0   1   1   0   0

Average Severity:   0.0   0.0   0.0   0.0   4.0   2.0   0.0   0.0

Ulcer

finding not present ‑  22  26  19  27  29  27  26  25

marked 4   0   0   0   0   1   0   0   0

Total Incidence:   0   0   0   0   1   0   0   0

Average Severity:   0.0   0.0   0.0   0.0   4.0   0.0   0.0   0.0

‑‑‑‑‑‑‑‑‑‑‑‑‑‑‑‑‑‑‑‑‑‑‑‑‑‑‑‑‑‑‑‑‑‑‑‑‑‑‑‑‑‑‑‑‑‑‑‑‑‑‑‑‑‑‑‑‑‑‑‑‑‑‑‑‑‑‑‑‑‑‑‑‑‑‑‑‑‑‑‑‑‑‑‑‑‑‑‑‑‑‑‑‑‑‑‑‑‑‑‑‑‑‑‑‑‑‑

Table

Summary of Severity for Selected Microscopic Observations

Unscheduled Euthanasias and Deaths

Test Article (dosage) 1M 2M 3M 4M 1F 2F 3F 4F

‑‑‑‑‑‑‑‑‑‑‑‑‑‑‑‑‑‑‑‑‑‑‑‑‑‑‑ ‑‑‑‑‑‑‑‑ ‑‑ ‑‑ ‑‑ ‑‑ ‑‑ ‑‑ ‑‑ ‑‑

Benzonatate (PF‑00345410) mg/kg/day 0 10 30 90 0 5 15 50

‑‑‑‑‑‑‑‑‑‑‑‑‑‑‑‑‑‑‑‑‑‑‑‑‑‑‑‑‑‑‑‑‑‑‑‑‑‑‑‑‑‑‑‑‑‑‑‑‑‑‑‑‑‑‑‑‑‑‑‑‑‑‑‑‑‑‑‑‑‑‑‑‑‑‑‑‑‑‑‑‑‑‑‑‑‑‑‑‑‑‑‑‑‑‑‑‑‑‑‑‑‑‑‑‑‑‑‑

Tissue/ Group/Subgroup/Sex: 1/1/M 2/1/M 3/1/M 4/1/M 1/1/F 2/1/F 3/1/F 4/1/F

Observation Number of Animals:  22  26  19  27  30  27  26  25

‑‑‑‑‑‑‑‑‑‑‑‑‑‑‑‑‑‑‑‑‑‑‑‑‑‑‑‑‑‑‑‑‑‑‑‑‑‑‑‑‑‑‑‑‑‑‑‑‑‑‑‑‑‑‑‑‑‑‑‑‑‑‑‑‑‑‑‑‑‑‑‑‑‑‑‑‑‑‑‑‑‑‑‑‑‑‑‑‑‑‑‑‑‑‑‑‑‑‑‑‑‑‑‑‑‑‑‑

Eye Number Examined:  22  26  19  27  30  27  26  25

Unremarkable:  21  20  14  21  23  25  22  21

Atrophy, retina

finding not present ‑  21  20  14  21  23  26  22  21

minimal 1   0   0   1   0   0   0   0   0

slight 2   1   5   3   4   6   1   4   3

moderate 3   0   1   1   2   1   0   0   1

Total Incidence:   1   6   5   6   7   1   4   4

Average Severity:   2.0   2.2   2.0   2.3   2.1   2.0   2.0   2.3

Rosette, retina

finding not present ‑  22  26  19  27  30  26  26  25

minimal 1   0   0   0   0   0   1   0   0

Total Incidence:   0   0   0   0   0   1   0   0

Average Severity:   0.0   0.0   0.0   0.0   0.0   1.0   0.0   0.0

Ulceration, cornea

finding not present ‑  22  26  19  27  30  27  25  25

moderate 3   0   0   0   0   0   0   1   0

Total Incidence:   0   0   0   0   0   0   1   0

Average Severity:   0.0   0.0   0.0   0.0   0.0   0.0   3.0   0.0

‑‑‑‑‑‑‑‑‑‑‑‑‑‑‑‑‑‑‑‑‑‑‑‑‑‑‑‑‑‑‑‑‑‑‑‑‑‑‑‑‑‑‑‑‑‑‑‑‑‑‑‑‑‑‑‑‑‑‑‑‑‑‑‑‑‑‑‑‑‑‑‑‑‑‑‑‑‑‑‑‑‑‑‑‑‑‑‑‑‑‑‑‑‑‑‑‑‑‑‑‑‑‑‑‑‑‑

Table

Summary of Severity for Selected Microscopic Observations

Unscheduled Euthanasias and Deaths

Test Article (dosage) 1M 2M 3M 4M 1F 2F 3F 4F

‑‑‑‑‑‑‑‑‑‑‑‑‑‑‑‑‑‑‑‑‑‑‑‑‑‑‑ ‑‑‑‑‑‑‑‑ ‑‑ ‑‑ ‑‑ ‑‑ ‑‑ ‑‑ ‑‑ ‑‑

Benzonatate (PF‑00345410) mg/kg/day 0 10 30 90 0 5 15 50

‑‑‑‑‑‑‑‑‑‑‑‑‑‑‑‑‑‑‑‑‑‑‑‑‑‑‑‑‑‑‑‑‑‑‑‑‑‑‑‑‑‑‑‑‑‑‑‑‑‑‑‑‑‑‑‑‑‑‑‑‑‑‑‑‑‑‑‑‑‑‑‑‑‑‑‑‑‑‑‑‑‑‑‑‑‑‑‑‑‑‑‑‑‑‑‑‑‑‑‑‑‑‑‑‑‑‑‑

Tissue/ Group/Subgroup/Sex: 1/1/M 2/1/M 3/1/M 4/1/M 1/1/F 2/1/F 3/1/F 4/1/F

Observation Number of Animals:  22  26  19  27  30  27  26  25

‑‑‑‑‑‑‑‑‑‑‑‑‑‑‑‑‑‑‑‑‑‑‑‑‑‑‑‑‑‑‑‑‑‑‑‑‑‑‑‑‑‑‑‑‑‑‑‑‑‑‑‑‑‑‑‑‑‑‑‑‑‑‑‑‑‑‑‑‑‑‑‑‑‑‑‑‑‑‑‑‑‑‑‑‑‑‑‑‑‑‑‑‑‑‑‑‑‑‑‑‑‑‑‑‑‑‑‑

Foot/Footpad Number Examined:   3   1   6   5   1   1   0   4

Unremarkable:   0   0   0   0   0   0   0   0

Inflammation/hyperplasia

finding not present ‑   0   0   0   0   0   0   0   0

minimal 1   0   0   1   0   0   0   0   0

slight 2   0   0   0   2   0   1   0   2

moderate 3   1   1   2   1   1   0   0   2

marked 4   2   0   3   2   0   0   0   0

Total Incidence:   3   1   6   5   1   1   0   4

Average Severity:   3.7   3.0   3.2   3.0   3.0   2.0   0.0   2.5

New bone formation

finding not present ‑   3   1   6   4   1   1   0   4

moderate 3   0   0   0   1   0   0   0   0

Total Incidence:   0   0   0   1   0   0   0   0

Average Severity:   0.0   0.0   0.0   3.0   0.0   0.0   0.0   0.0

Ulcer

finding not present ‑   3   0   3   3   0   1   0   3

slight 2   0   0   0   0   0   0   0   1

moderate 3   0   1   2   0   1   0   0   0

marked 4   0   0   1   2   0   0   0   0

Total Incidence:   0   1   3   2   1   0   0   1

Average Severity:   0.0   3.0   3.3   4.0   3.0   0.0   0.0   2.0

‑‑‑‑‑‑‑‑‑‑‑‑‑‑‑‑‑‑‑‑‑‑‑‑‑‑‑‑‑‑‑‑‑‑‑‑‑‑‑‑‑‑‑‑‑‑‑‑‑‑‑‑‑‑‑‑‑‑‑‑‑‑‑‑‑‑‑‑‑‑‑‑‑‑‑‑‑‑‑‑‑‑‑‑‑‑‑‑‑‑‑‑‑‑‑‑‑‑‑‑‑‑‑‑‑‑‑

Table

Summary of Severity for Selected Microscopic Observations

Unscheduled Euthanasias and Deaths

Test Article (dosage) 1M 2M 3M 4M 1F 2F 3F 4F

‑‑‑‑‑‑‑‑‑‑‑‑‑‑‑‑‑‑‑‑‑‑‑‑‑‑‑ ‑‑‑‑‑‑‑‑ ‑‑ ‑‑ ‑‑ ‑‑ ‑‑ ‑‑ ‑‑ ‑‑

Benzonatate (PF‑00345410) mg/kg/day 0 10 30 90 0 5 15 50

‑‑‑‑‑‑‑‑‑‑‑‑‑‑‑‑‑‑‑‑‑‑‑‑‑‑‑‑‑‑‑‑‑‑‑‑‑‑‑‑‑‑‑‑‑‑‑‑‑‑‑‑‑‑‑‑‑‑‑‑‑‑‑‑‑‑‑‑‑‑‑‑‑‑‑‑‑‑‑‑‑‑‑‑‑‑‑‑‑‑‑‑‑‑‑‑‑‑‑‑‑‑‑‑‑‑‑‑

Tissue/ Group/Subgroup/Sex: 1/1/M 2/1/M 3/1/M 4/1/M 1/1/F 2/1/F 3/1/F 4/1/F

Observation Number of Animals:  22  26  19  27  30  27  26  25

‑‑‑‑‑‑‑‑‑‑‑‑‑‑‑‑‑‑‑‑‑‑‑‑‑‑‑‑‑‑‑‑‑‑‑‑‑‑‑‑‑‑‑‑‑‑‑‑‑‑‑‑‑‑‑‑‑‑‑‑‑‑‑‑‑‑‑‑‑‑‑‑‑‑‑‑‑‑‑‑‑‑‑‑‑‑‑‑‑‑‑‑‑‑‑‑‑‑‑‑‑‑‑‑‑‑‑‑

GALT/Peyer's Patch Number Examined:  21  25  19  27  28  24  23  24

Unremarkable:  21  25  19  26  27  24  23  24

Necrosis, lymphocytes

finding not present ‑  21  25  19  27  27  24  23  24

minimal 1   0   0   0   0   1   0   0   0

Total Incidence:   0   0   0   0   1   0   0   0

Average Severity:   0.0   0.0   0.0   0.0   1.0   0.0   0.0   0.0

‑‑‑‑‑‑‑‑‑‑‑‑‑‑‑‑‑‑‑‑‑‑‑‑‑‑‑‑‑‑‑‑‑‑‑‑‑‑‑‑‑‑‑‑‑‑‑‑‑‑‑‑‑‑‑‑‑‑‑‑‑‑‑‑‑‑‑‑‑‑‑‑‑‑‑‑‑‑‑‑‑‑‑‑‑‑‑‑‑‑‑‑‑‑‑‑‑‑‑‑‑‑‑‑‑‑‑

Table

Summary of Severity for Selected Microscopic Observations

Unscheduled Euthanasias and Deaths

Test Article (dosage) 1M 2M 3M 4M 1F 2F 3F 4F

‑‑‑‑‑‑‑‑‑‑‑‑‑‑‑‑‑‑‑‑‑‑‑‑‑‑‑ ‑‑‑‑‑‑‑‑ ‑‑ ‑‑ ‑‑ ‑‑ ‑‑ ‑‑ ‑‑ ‑‑

Benzonatate (PF‑00345410) mg/kg/day 0 10 30 90 0 5 15 50

‑‑‑‑‑‑‑‑‑‑‑‑‑‑‑‑‑‑‑‑‑‑‑‑‑‑‑‑‑‑‑‑‑‑‑‑‑‑‑‑‑‑‑‑‑‑‑‑‑‑‑‑‑‑‑‑‑‑‑‑‑‑‑‑‑‑‑‑‑‑‑‑‑‑‑‑‑‑‑‑‑‑‑‑‑‑‑‑‑‑‑‑‑‑‑‑‑‑‑‑‑‑‑‑‑‑‑‑

Tissue/ Group/Subgroup/Sex: 1/1/M 2/1/M 3/1/M 4/1/M 1/1/F 2/1/F 3/1/F 4/1/F

Observation Number of Animals:  22  26  19  27  30  27  26  25

‑‑‑‑‑‑‑‑‑‑‑‑‑‑‑‑‑‑‑‑‑‑‑‑‑‑‑‑‑‑‑‑‑‑‑‑‑‑‑‑‑‑‑‑‑‑‑‑‑‑‑‑‑‑‑‑‑‑‑‑‑‑‑‑‑‑‑‑‑‑‑‑‑‑‑‑‑‑‑‑‑‑‑‑‑‑‑‑‑‑‑‑‑‑‑‑‑‑‑‑‑‑‑‑‑‑‑‑

Harderian Gland Number Examined:  22  26  19  27  30  27  26  25

Unremarkable:  11  17  13  16  20  19  18  18

Hyperplasia

finding not present ‑  21  25  18  26  29  26  26  24

minimal 1   0   0   1   1   1   1   0   0

slight 2   0   0   0   0   0   0   0   1

moderate 3   1   1   0   0   0   0   0   0

Total Incidence:   1   1   1   1   1   1   0   1

Average Severity:   3.0   3.0   1.0   1.0   1.0   1.0   0.0   2.0

Infiltrate, mononuclear cell

finding not present ‑  12  20  13  16  22  20  20  18

minimal 1   9   2   3   6   6   6   6   6

slight 2   1   3   3   5   2   1   0   1

marked 4   0   1   0   0   0   0   0   0

Total Incidence:  10   6   6  11   8   7   6   7

Average Severity:   1.1   2.0   1.5   1.5   1.3   1.1   1.0   1.1

Inflammation, chronic‑active

finding not present ‑  22  25  19  27  30  27  26  25

minimal 1   0   1   0   0   0   0   0   0

Total Incidence:   0   1   0   0   0   0   0   0

Average Severity:   0.0   1.0   0.0   0.0   0.0   0.0   0.0   0.0

‑‑‑‑‑‑‑‑‑‑‑‑‑‑‑‑‑‑‑‑‑‑‑‑‑‑‑‑‑‑‑‑‑‑‑‑‑‑‑‑‑‑‑‑‑‑‑‑‑‑‑‑‑‑‑‑‑‑‑‑‑‑‑‑‑‑‑‑‑‑‑‑‑‑‑‑‑‑‑‑‑‑‑‑‑‑‑‑‑‑‑‑‑‑‑‑‑‑‑‑‑‑‑‑‑‑‑

Table

Summary of Severity for Selected Microscopic Observations

Unscheduled Euthanasias and Deaths

Test Article (dosage) 1M 2M 3M 4M 1F 2F 3F 4F

‑‑‑‑‑‑‑‑‑‑‑‑‑‑‑‑‑‑‑‑‑‑‑‑‑‑‑ ‑‑‑‑‑‑‑‑ ‑‑ ‑‑ ‑‑ ‑‑ ‑‑ ‑‑ ‑‑ ‑‑

Benzonatate (PF‑00345410) mg/kg/day 0 10 30 90 0 5 15 50

‑‑‑‑‑‑‑‑‑‑‑‑‑‑‑‑‑‑‑‑‑‑‑‑‑‑‑‑‑‑‑‑‑‑‑‑‑‑‑‑‑‑‑‑‑‑‑‑‑‑‑‑‑‑‑‑‑‑‑‑‑‑‑‑‑‑‑‑‑‑‑‑‑‑‑‑‑‑‑‑‑‑‑‑‑‑‑‑‑‑‑‑‑‑‑‑‑‑‑‑‑‑‑‑‑‑‑‑

Tissue/ Group/Subgroup/Sex: 1/1/M 2/1/M 3/1/M 4/1/M 1/1/F 2/1/F 3/1/F 4/1/F

Observation Number of Animals:  22  26  19  27  30  27  26  25

‑‑‑‑‑‑‑‑‑‑‑‑‑‑‑‑‑‑‑‑‑‑‑‑‑‑‑‑‑‑‑‑‑‑‑‑‑‑‑‑‑‑‑‑‑‑‑‑‑‑‑‑‑‑‑‑‑‑‑‑‑‑‑‑‑‑‑‑‑‑‑‑‑‑‑‑‑‑‑‑‑‑‑‑‑‑‑‑‑‑‑‑‑‑‑‑‑‑‑‑‑‑‑‑‑‑‑‑

Harderian Gland Number Examined:  22  26  19  27  30  27  26  25

Unremarkable:  11  17  13  16  20  19  18  18

Inflammation, granulomatous

finding not present ‑  21  25  19  27  30  26  24  25

minimal 1   1   1   0   0   0   1   1   0

slight 2   0   0   0   0   0   0   1   0

Total Incidence:   1   1   0   0   0   1   2   0

Average Severity:   1.0   1.0   0.0   0.0   0.0   1.0   1.5   0.0

‑‑‑‑‑‑‑‑‑‑‑‑‑‑‑‑‑‑‑‑‑‑‑‑‑‑‑‑‑‑‑‑‑‑‑‑‑‑‑‑‑‑‑‑‑‑‑‑‑‑‑‑‑‑‑‑‑‑‑‑‑‑‑‑‑‑‑‑‑‑‑‑‑‑‑‑‑‑‑‑‑‑‑‑‑‑‑‑‑‑‑‑‑‑‑‑‑‑‑‑‑‑‑‑‑‑‑

Table

Summary of Severity for Selected Microscopic Observations

Unscheduled Euthanasias and Deaths

Test Article (dosage) 1M 2M 3M 4M 1F 2F 3F 4F

‑‑‑‑‑‑‑‑‑‑‑‑‑‑‑‑‑‑‑‑‑‑‑‑‑‑‑ ‑‑‑‑‑‑‑‑ ‑‑ ‑‑ ‑‑ ‑‑ ‑‑ ‑‑ ‑‑ ‑‑

Benzonatate (PF‑00345410) mg/kg/day 0 10 30 90 0 5 15 50

‑‑‑‑‑‑‑‑‑‑‑‑‑‑‑‑‑‑‑‑‑‑‑‑‑‑‑‑‑‑‑‑‑‑‑‑‑‑‑‑‑‑‑‑‑‑‑‑‑‑‑‑‑‑‑‑‑‑‑‑‑‑‑‑‑‑‑‑‑‑‑‑‑‑‑‑‑‑‑‑‑‑‑‑‑‑‑‑‑‑‑‑‑‑‑‑‑‑‑‑‑‑‑‑‑‑‑‑

Tissue/ Group/Subgroup/Sex: 1/1/M 2/1/M 3/1/M 4/1/M 1/1/F 2/1/F 3/1/F 4/1/F

Observation Number of Animals:  22  26  19  27  30  27  26  25

‑‑‑‑‑‑‑‑‑‑‑‑‑‑‑‑‑‑‑‑‑‑‑‑‑‑‑‑‑‑‑‑‑‑‑‑‑‑‑‑‑‑‑‑‑‑‑‑‑‑‑‑‑‑‑‑‑‑‑‑‑‑‑‑‑‑‑‑‑‑‑‑‑‑‑‑‑‑‑‑‑‑‑‑‑‑‑‑‑‑‑‑‑‑‑‑‑‑‑‑‑‑‑‑‑‑‑‑

Heart Number Examined:  22  26  19  27  30  27  26  25

Unremarkable:   9   9   3   9  15  15  19  15

Cardiomyopathy, degenerative

finding not present ‑  10  12   4  10  15  15  20  15

minimal 1   4   7   5   6   7   4   1   6

slight 2   6   7  10   7   6   5   4   3

moderate 3   2   0   0   4   2   3   1   1

Total Incidence:  12  14  15  17  15  12   6  10

Average Severity:   1.8   1.5   1.7   1.9   1.7   1.9   2.0   1.5

Hemorrhage

finding not present ‑  20  25  19  27  29  26  26  25

minimal 1   0   0   0   0   1   0   0   0

slight 2   2   1   0   0   0   1   0   0

Total Incidence:   2   1   0   0   1   1   0   0

Average Severity:   2.0   2.0   0.0   0.0   1.0   2.0   0.0   0.0

Hyperplasia, endocardium

finding not present ‑  22  26  18  26  30  27  26  25

moderate 3   0   0   1   1   0   0   0   0

Total Incidence:   0   0   1   1   0   0   0   0

Average Severity:   0.0   0.0   3.0   3.0   0.0   0.0   0.0   0.0

‑‑‑‑‑‑‑‑‑‑‑‑‑‑‑‑‑‑‑‑‑‑‑‑‑‑‑‑‑‑‑‑‑‑‑‑‑‑‑‑‑‑‑‑‑‑‑‑‑‑‑‑‑‑‑‑‑‑‑‑‑‑‑‑‑‑‑‑‑‑‑‑‑‑‑‑‑‑‑‑‑‑‑‑‑‑‑‑‑‑‑‑‑‑‑‑‑‑‑‑‑‑‑‑‑‑‑

Table

Summary of Severity for Selected Microscopic Observations

Unscheduled Euthanasias and Deaths

Test Article (dosage) 1M 2M 3M 4M 1F 2F 3F 4F

‑‑‑‑‑‑‑‑‑‑‑‑‑‑‑‑‑‑‑‑‑‑‑‑‑‑‑ ‑‑‑‑‑‑‑‑ ‑‑ ‑‑ ‑‑ ‑‑ ‑‑ ‑‑ ‑‑ ‑‑

Benzonatate (PF‑00345410) mg/kg/day 0 10 30 90 0 5 15 50

‑‑‑‑‑‑‑‑‑‑‑‑‑‑‑‑‑‑‑‑‑‑‑‑‑‑‑‑‑‑‑‑‑‑‑‑‑‑‑‑‑‑‑‑‑‑‑‑‑‑‑‑‑‑‑‑‑‑‑‑‑‑‑‑‑‑‑‑‑‑‑‑‑‑‑‑‑‑‑‑‑‑‑‑‑‑‑‑‑‑‑‑‑‑‑‑‑‑‑‑‑‑‑‑‑‑‑‑

Tissue/ Group/Subgroup/Sex: 1/1/M 2/1/M 3/1/M 4/1/M 1/1/F 2/1/F 3/1/F 4/1/F

Observation Number of Animals:  22  26  19  27  30  27  26  25

‑‑‑‑‑‑‑‑‑‑‑‑‑‑‑‑‑‑‑‑‑‑‑‑‑‑‑‑‑‑‑‑‑‑‑‑‑‑‑‑‑‑‑‑‑‑‑‑‑‑‑‑‑‑‑‑‑‑‑‑‑‑‑‑‑‑‑‑‑‑‑‑‑‑‑‑‑‑‑‑‑‑‑‑‑‑‑‑‑‑‑‑‑‑‑‑‑‑‑‑‑‑‑‑‑‑‑‑

Heart Number Examined:  22  26  19  27  30  27  26  25

Unremarkable:   9   9   3   9  15  15  19  15

Infiltrate, mononuclear cell

finding not present ‑  22  26  19  27  30  27  25  25

minimal 1   0   0   0   0   0   0   1   0

Total Incidence:   0   0   0   0   0   0   1   0

Average Severity:   0.0   0.0   0.0   0.0   0.0   0.0   1.0   0.0

Inflammation, vessel

finding not present ‑  21  26  19  26  30  27  26  25

slight 2   0   0   0   1   0   0   0   0

moderate 3   1   0   0   0   0   0   0   0

Total Incidence:   1   0   0   1   0   0   0   0

Average Severity:   3.0   0.0   0.0   2.0   0.0   0.0   0.0   0.0

Mineralization, vessel

finding not present ‑  22  25  19  27  30  27  26  25

slight 2   0   1   0   0   0   0   0   0

Total Incidence:   0   1   0   0   0   0   0   0

Average Severity:   0.0   2.0   0.0   0.0   0.0   0.0   0.0   0.0

‑‑‑‑‑‑‑‑‑‑‑‑‑‑‑‑‑‑‑‑‑‑‑‑‑‑‑‑‑‑‑‑‑‑‑‑‑‑‑‑‑‑‑‑‑‑‑‑‑‑‑‑‑‑‑‑‑‑‑‑‑‑‑‑‑‑‑‑‑‑‑‑‑‑‑‑‑‑‑‑‑‑‑‑‑‑‑‑‑‑‑‑‑‑‑‑‑‑‑‑‑‑‑‑‑‑‑

Table

Summary of Severity for Selected Microscopic Observations

Unscheduled Euthanasias and Deaths

Test Article (dosage) 1M 2M 3M 4M 1F 2F 3F 4F

‑‑‑‑‑‑‑‑‑‑‑‑‑‑‑‑‑‑‑‑‑‑‑‑‑‑‑ ‑‑‑‑‑‑‑‑ ‑‑ ‑‑ ‑‑ ‑‑ ‑‑ ‑‑ ‑‑ ‑‑

Benzonatate (PF‑00345410) mg/kg/day 0 10 30 90 0 5 15 50

‑‑‑‑‑‑‑‑‑‑‑‑‑‑‑‑‑‑‑‑‑‑‑‑‑‑‑‑‑‑‑‑‑‑‑‑‑‑‑‑‑‑‑‑‑‑‑‑‑‑‑‑‑‑‑‑‑‑‑‑‑‑‑‑‑‑‑‑‑‑‑‑‑‑‑‑‑‑‑‑‑‑‑‑‑‑‑‑‑‑‑‑‑‑‑‑‑‑‑‑‑‑‑‑‑‑‑‑

Tissue/ Group/Subgroup/Sex: 1/1/M 2/1/M 3/1/M 4/1/M 1/1/F 2/1/F 3/1/F 4/1/F

Observation Number of Animals:  22  26  19  27  30  27  26  25

‑‑‑‑‑‑‑‑‑‑‑‑‑‑‑‑‑‑‑‑‑‑‑‑‑‑‑‑‑‑‑‑‑‑‑‑‑‑‑‑‑‑‑‑‑‑‑‑‑‑‑‑‑‑‑‑‑‑‑‑‑‑‑‑‑‑‑‑‑‑‑‑‑‑‑‑‑‑‑‑‑‑‑‑‑‑‑‑‑‑‑‑‑‑‑‑‑‑‑‑‑‑‑‑‑‑‑‑

Heart Number Examined:  22  26  19  27  30  27  26  25

Unremarkable:   9   9   3   9  15  15  19  15

Thrombus, atrium

finding not present ‑  22  25  19  27  30  27  26  25

marked 4   0   1   0   0   0   0   0   0

Total Incidence:   0   1   0   0   0   0   0   0

Average Severity:   0.0   4.0   0.0   0.0   0.0   0.0   0.0   0.0

Ileum Number Examined:  21  25  17  26  30  25  26  24

Unremarkable:  21  25  17  26  30  25  26  24

Jejunum Number Examined:  19  25  19  25  29  27  25  25

Unremarkable:  19  24  18  25  29  27  25  25

Joint, Other Number Examined:   1   1   0   0   0   0   0   0

Unremarkable:   1   0   0   0   0   0   0   0

Hyperostosis, periosteum

finding not present ‑   1   0   0   0   0   0   0   0

moderate 3   0   1   0   0   0   0   0   0

Total Incidence:   0   1   0   0   0   0   0   0

Average Severity:   0.0   3.0   0.0   0.0   0.0   0.0   0.0   0.0

‑‑‑‑‑‑‑‑‑‑‑‑‑‑‑‑‑‑‑‑‑‑‑‑‑‑‑‑‑‑‑‑‑‑‑‑‑‑‑‑‑‑‑‑‑‑‑‑‑‑‑‑‑‑‑‑‑‑‑‑‑‑‑‑‑‑‑‑‑‑‑‑‑‑‑‑‑‑‑‑‑‑‑‑‑‑‑‑‑‑‑‑‑‑‑‑‑‑‑‑‑‑‑‑‑‑‑

Table

Summary of Severity for Selected Microscopic Observations

Unscheduled Euthanasias and Deaths

Test Article (dosage) 1M 2M 3M 4M 1F 2F 3F 4F

‑‑‑‑‑‑‑‑‑‑‑‑‑‑‑‑‑‑‑‑‑‑‑‑‑‑‑ ‑‑‑‑‑‑‑‑ ‑‑ ‑‑ ‑‑ ‑‑ ‑‑ ‑‑ ‑‑ ‑‑

Benzonatate (PF‑00345410) mg/kg/day 0 10 30 90 0 5 15 50

‑‑‑‑‑‑‑‑‑‑‑‑‑‑‑‑‑‑‑‑‑‑‑‑‑‑‑‑‑‑‑‑‑‑‑‑‑‑‑‑‑‑‑‑‑‑‑‑‑‑‑‑‑‑‑‑‑‑‑‑‑‑‑‑‑‑‑‑‑‑‑‑‑‑‑‑‑‑‑‑‑‑‑‑‑‑‑‑‑‑‑‑‑‑‑‑‑‑‑‑‑‑‑‑‑‑‑‑

Tissue/ Group/Subgroup/Sex: 1/1/M 2/1/M 3/1/M 4/1/M 1/1/F 2/1/F 3/1/F 4/1/F

Observation Number of Animals:  22  26  19  27  30  27  26  25

‑‑‑‑‑‑‑‑‑‑‑‑‑‑‑‑‑‑‑‑‑‑‑‑‑‑‑‑‑‑‑‑‑‑‑‑‑‑‑‑‑‑‑‑‑‑‑‑‑‑‑‑‑‑‑‑‑‑‑‑‑‑‑‑‑‑‑‑‑‑‑‑‑‑‑‑‑‑‑‑‑‑‑‑‑‑‑‑‑‑‑‑‑‑‑‑‑‑‑‑‑‑‑‑‑‑‑‑

Kidney Number Examined:  22  26  19  27  30  27  26  25

Unremarkable:   9   6   5   4   7   5   6   7

Cyst

finding not present ‑  22  25  19  27  30  26  26  25

minimal 1   0   0   0   0   0   1   0   0

moderate 3   0   1   0   0   0   0   0   0

Total Incidence:   0   1   0   0   0   1   0   0

Average Severity:   0.0   3.0   0.0   0.0   0.0   1.0   0.0   0.0

Degeneration/necrosis, tubule

finding not present ‑  22  26  19  27  30  26  26  25

slight 2   0   0   0   0   0   1   0   0

Total Incidence:   0   0   0   0   0   1   0   0

Average Severity:   0.0   0.0   0.0   0.0   0.0   2.0   0.0   0.0

Degeneration/Regeneration, Tubule

finding not present ‑  21  26  19  27  30  27  26  25

moderate 3   1   0   0   0   0   0   0   0

Total Incidence:   1   0   0   0   0   0   0   0

Average Severity:   3.0   0.0   0.0   0.0   0.0   0.0   0.0   0.0

‑‑‑‑‑‑‑‑‑‑‑‑‑‑‑‑‑‑‑‑‑‑‑‑‑‑‑‑‑‑‑‑‑‑‑‑‑‑‑‑‑‑‑‑‑‑‑‑‑‑‑‑‑‑‑‑‑‑‑‑‑‑‑‑‑‑‑‑‑‑‑‑‑‑‑‑‑‑‑‑‑‑‑‑‑‑‑‑‑‑‑‑‑‑‑‑‑‑‑‑‑‑‑‑‑‑‑

Table

Summary of Severity for Selected Microscopic Observations

Unscheduled Euthanasias and Deaths

Test Article (dosage) 1M 2M 3M 4M 1F 2F 3F 4F

‑‑‑‑‑‑‑‑‑‑‑‑‑‑‑‑‑‑‑‑‑‑‑‑‑‑‑ ‑‑‑‑‑‑‑‑ ‑‑ ‑‑ ‑‑ ‑‑ ‑‑ ‑‑ ‑‑ ‑‑

Benzonatate (PF‑00345410) mg/kg/day 0 10 30 90 0 5 15 50

‑‑‑‑‑‑‑‑‑‑‑‑‑‑‑‑‑‑‑‑‑‑‑‑‑‑‑‑‑‑‑‑‑‑‑‑‑‑‑‑‑‑‑‑‑‑‑‑‑‑‑‑‑‑‑‑‑‑‑‑‑‑‑‑‑‑‑‑‑‑‑‑‑‑‑‑‑‑‑‑‑‑‑‑‑‑‑‑‑‑‑‑‑‑‑‑‑‑‑‑‑‑‑‑‑‑‑‑

Tissue/ Group/Subgroup/Sex: 1/1/M 2/1/M 3/1/M 4/1/M 1/1/F 2/1/F 3/1/F 4/1/F

Observation Number of Animals:  22  26  19  27  30  27  26  25

‑‑‑‑‑‑‑‑‑‑‑‑‑‑‑‑‑‑‑‑‑‑‑‑‑‑‑‑‑‑‑‑‑‑‑‑‑‑‑‑‑‑‑‑‑‑‑‑‑‑‑‑‑‑‑‑‑‑‑‑‑‑‑‑‑‑‑‑‑‑‑‑‑‑‑‑‑‑‑‑‑‑‑‑‑‑‑‑‑‑‑‑‑‑‑‑‑‑‑‑‑‑‑‑‑‑‑‑

Kidney Number Examined:  22  26  19  27  30  27  26  25

Unremarkable:   9   6   5   4   7   5   6   7

Dilatation, pelvis

finding not present ‑  19  25  18  23  29  26  23  25

minimal 1   1   0   1   1   0   0   0   0

slight 2   2   0   0   2   0   0   2   0

moderate 3   0   1   0   1   1   0   1   0

marked 4   0   0   0   0   0   1   0   0

Total Incidence:   3   1   1   4   1   1   3   0

Average Severity:   1.7   3.0   1.0   2.0   3.0   4.0   2.3   0.0

Dilatation, tubule(s)

finding not present ‑  21  26  19  27  29  26  26  25

slight 2   0   0   0   0   0   1   0   0

moderate 3   1   0   0   0   1   0   0   0

Total Incidence:   1   0   0   0   1   1   0   0

Average Severity:   3.0   0.0   0.0   0.0   3.0   2.0   0.0   0.0

Hyaline droplet, tubule cell

finding not present ‑  22  25  19  26  30  27  26  24

slight 2   0   0   0   1   0   0   0   1

moderate 3   0   1   0   0   0   0   0   0

Total Incidence:   0   1   0   1   0   0   0   1

Average Severity:   0.0   3.0   0.0   2.0   0.0   0.0   0.0   2.0

‑‑‑‑‑‑‑‑‑‑‑‑‑‑‑‑‑‑‑‑‑‑‑‑‑‑‑‑‑‑‑‑‑‑‑‑‑‑‑‑‑‑‑‑‑‑‑‑‑‑‑‑‑‑‑‑‑‑‑‑‑‑‑‑‑‑‑‑‑‑‑‑‑‑‑‑‑‑‑‑‑‑‑‑‑‑‑‑‑‑‑‑‑‑‑‑‑‑‑‑‑‑‑‑‑‑‑

Table

Summary of Severity for Selected Microscopic Observations

Unscheduled Euthanasias and Deaths

Test Article (dosage) 1M 2M 3M 4M 1F 2F 3F 4F

‑‑‑‑‑‑‑‑‑‑‑‑‑‑‑‑‑‑‑‑‑‑‑‑‑‑‑ ‑‑‑‑‑‑‑‑ ‑‑ ‑‑ ‑‑ ‑‑ ‑‑ ‑‑ ‑‑ ‑‑

Benzonatate (PF‑00345410) mg/kg/day 0 10 30 90 0 5 15 50

‑‑‑‑‑‑‑‑‑‑‑‑‑‑‑‑‑‑‑‑‑‑‑‑‑‑‑‑‑‑‑‑‑‑‑‑‑‑‑‑‑‑‑‑‑‑‑‑‑‑‑‑‑‑‑‑‑‑‑‑‑‑‑‑‑‑‑‑‑‑‑‑‑‑‑‑‑‑‑‑‑‑‑‑‑‑‑‑‑‑‑‑‑‑‑‑‑‑‑‑‑‑‑‑‑‑‑‑

Tissue/ Group/Subgroup/Sex: 1/1/M 2/1/M 3/1/M 4/1/M 1/1/F 2/1/F 3/1/F 4/1/F

Observation Number of Animals:  22  26  19  27  30  27  26  25

‑‑‑‑‑‑‑‑‑‑‑‑‑‑‑‑‑‑‑‑‑‑‑‑‑‑‑‑‑‑‑‑‑‑‑‑‑‑‑‑‑‑‑‑‑‑‑‑‑‑‑‑‑‑‑‑‑‑‑‑‑‑‑‑‑‑‑‑‑‑‑‑‑‑‑‑‑‑‑‑‑‑‑‑‑‑‑‑‑‑‑‑‑‑‑‑‑‑‑‑‑‑‑‑‑‑‑‑

Kidney Number Examined:  22  26  19  27  30  27  26  25

Unremarkable:   9   6   5   4   7   5   6   7

Hyperplasia, transitional cell

finding not present ‑  19  23  16  23  14  15  14  12

minimal 1   1   2   2   2  11   9   8   8

slight 2   2   0   1   1   5   2   4   5

moderate 3   0   1   0   1   0   1   0   0

Total Incidence:   3   3   3   4  16  12  12  13

Average Severity:   1.7   1.7   1.3   1.8   1.3   1.3   1.3   1.4

Hyperplasia, tubule cell

finding not present ‑  22  25  19  27  30  26  26  25

minimal 1   0   1   0   0   0   0   0   0

slight 2   0   0   0   0   0   1   0   0

Total Incidence:   0   1   0   0   0   1   0   0

Average Severity:   0.0   1.0   0.0   0.0   0.0   2.0   0.0   0.0

Inflammation, chronic

finding not present ‑  21  26  19  27  30  27  26  25

slight 2   1   0   0   0   0   0   0   0

Total Incidence:   1   0   0   0   0   0   0   0

Average Severity:   2.0   0.0   0.0   0.0   0.0   0.0   0.0   0.0

‑‑‑‑‑‑‑‑‑‑‑‑‑‑‑‑‑‑‑‑‑‑‑‑‑‑‑‑‑‑‑‑‑‑‑‑‑‑‑‑‑‑‑‑‑‑‑‑‑‑‑‑‑‑‑‑‑‑‑‑‑‑‑‑‑‑‑‑‑‑‑‑‑‑‑‑‑‑‑‑‑‑‑‑‑‑‑‑‑‑‑‑‑‑‑‑‑‑‑‑‑‑‑‑‑‑‑

Table

Summary of Severity for Selected Microscopic Observations

Unscheduled Euthanasias and Deaths

Test Article (dosage) 1M 2M 3M 4M 1F 2F 3F 4F

‑‑‑‑‑‑‑‑‑‑‑‑‑‑‑‑‑‑‑‑‑‑‑‑‑‑‑ ‑‑‑‑‑‑‑‑ ‑‑ ‑‑ ‑‑ ‑‑ ‑‑ ‑‑ ‑‑ ‑‑

Benzonatate (PF‑00345410) mg/kg/day 0 10 30 90 0 5 15 50

‑‑‑‑‑‑‑‑‑‑‑‑‑‑‑‑‑‑‑‑‑‑‑‑‑‑‑‑‑‑‑‑‑‑‑‑‑‑‑‑‑‑‑‑‑‑‑‑‑‑‑‑‑‑‑‑‑‑‑‑‑‑‑‑‑‑‑‑‑‑‑‑‑‑‑‑‑‑‑‑‑‑‑‑‑‑‑‑‑‑‑‑‑‑‑‑‑‑‑‑‑‑‑‑‑‑‑‑

Tissue/ Group/Subgroup/Sex: 1/1/M 2/1/M 3/1/M 4/1/M 1/1/F 2/1/F 3/1/F 4/1/F

Observation Number of Animals:  22  26  19  27  30  27  26  25

‑‑‑‑‑‑‑‑‑‑‑‑‑‑‑‑‑‑‑‑‑‑‑‑‑‑‑‑‑‑‑‑‑‑‑‑‑‑‑‑‑‑‑‑‑‑‑‑‑‑‑‑‑‑‑‑‑‑‑‑‑‑‑‑‑‑‑‑‑‑‑‑‑‑‑‑‑‑‑‑‑‑‑‑‑‑‑‑‑‑‑‑‑‑‑‑‑‑‑‑‑‑‑‑‑‑‑‑

Kidney Number Examined:  22  26  19  27  30  27  26  25

Unremarkable:   9   6   5   4   7   5   6   7

Mineralization, pelvis

finding not present ‑  19  24  17  25  14  12  12  11

minimal 1   3   2   2   2  15  13  10  11

slight 2   0   0   0   0   1   2   4   2

moderate 3   0   0   0   0   0   0   0   1

Total Incidence:   3   2   2   2  16  15  14  14

Average Severity:   1.0   1.0   1.0   1.0   1.1   1.1   1.3   1.3

Nephropathy, chronic progressive

finding not present ‑  11   9   6   9  14  13  18  14

minimal 1   7  11  10  10  14  10   6   8

slight 2   3   3   2   6   2   4   2   3

moderate 3   1   3   1   1   0   0   0   0

marked 4   0   0   0   1   0   0   0   0

Total Incidence:  11  17  13  18  16  14   8  11

Average Severity:   1.5   1.5   1.3   1.6   1.1   1.3   1.3   1.3

Pigment, increased

finding not present ‑  22  26  19  27  28  26  26  24

minimal 1   0   0   0   0   2   0   0   0

slight 2   0   0   0   0   0   1   0   1

Total Incidence:   0   0   0   0   2   1   0   1

Average Severity:   0.0   0.0   0.0   0.0   1.0   2.0   0.0   2.0

‑‑‑‑‑‑‑‑‑‑‑‑‑‑‑‑‑‑‑‑‑‑‑‑‑‑‑‑‑‑‑‑‑‑‑‑‑‑‑‑‑‑‑‑‑‑‑‑‑‑‑‑‑‑‑‑‑‑‑‑‑‑‑‑‑‑‑‑‑‑‑‑‑‑‑‑‑‑‑‑‑‑‑‑‑‑‑‑‑‑‑‑‑‑‑‑‑‑‑‑‑‑‑‑‑‑‑

Table

Summary of Severity for Selected Microscopic Observations

Unscheduled Euthanasias and Deaths

Test Article (dosage) 1M 2M 3M 4M 1F 2F 3F 4F

‑‑‑‑‑‑‑‑‑‑‑‑‑‑‑‑‑‑‑‑‑‑‑‑‑‑‑ ‑‑‑‑‑‑‑‑ ‑‑ ‑‑ ‑‑ ‑‑ ‑‑ ‑‑ ‑‑ ‑‑

Benzonatate (PF‑00345410) mg/kg/day 0 10 30 90 0 5 15 50

‑‑‑‑‑‑‑‑‑‑‑‑‑‑‑‑‑‑‑‑‑‑‑‑‑‑‑‑‑‑‑‑‑‑‑‑‑‑‑‑‑‑‑‑‑‑‑‑‑‑‑‑‑‑‑‑‑‑‑‑‑‑‑‑‑‑‑‑‑‑‑‑‑‑‑‑‑‑‑‑‑‑‑‑‑‑‑‑‑‑‑‑‑‑‑‑‑‑‑‑‑‑‑‑‑‑‑‑

Tissue/ Group/Subgroup/Sex: 1/1/M 2/1/M 3/1/M 4/1/M 1/1/F 2/1/F 3/1/F 4/1/F

Observation Number of Animals:  22  26  19  27  30  27  26  25

‑‑‑‑‑‑‑‑‑‑‑‑‑‑‑‑‑‑‑‑‑‑‑‑‑‑‑‑‑‑‑‑‑‑‑‑‑‑‑‑‑‑‑‑‑‑‑‑‑‑‑‑‑‑‑‑‑‑‑‑‑‑‑‑‑‑‑‑‑‑‑‑‑‑‑‑‑‑‑‑‑‑‑‑‑‑‑‑‑‑‑‑‑‑‑‑‑‑‑‑‑‑‑‑‑‑‑‑

Kidney Number Examined:  22  26  19  27  30  27  26  25

Unremarkable:   9   6   5   4   7   5   6   7

Pyelonephritis

finding not present ‑  19  25  16  23  28  23  23  23

minimal 1   1   0   1   2   1   3   1   2

slight 2   2   0   2   0   1   0   0   0

moderate 3   0   1   0   2   0   0   1   0

marked 4   0   0   0   0   0   1   1   0

Total Incidence:   3   1   3   4   2   4   3   2

Average Severity:   1.7   3.0   1.7   2.0   1.5   1.8   2.7   1.0

Lacrimal Gland Number Examined:   0   1   2   1   1   0   0   0

Unremarkable:   0   0   0   0   1   0   0   0

Ectopic Harderian gland

finding not present ‑   0   0   0   0   1   0   0   0

slight 2   0   1   2   1   0   0   0   0

Total Incidence:   0   1   2   1   0   0   0   0

Average Severity:   0.0   2.0   2.0   2.0   0.0   0.0   0.0   0.0

‑‑‑‑‑‑‑‑‑‑‑‑‑‑‑‑‑‑‑‑‑‑‑‑‑‑‑‑‑‑‑‑‑‑‑‑‑‑‑‑‑‑‑‑‑‑‑‑‑‑‑‑‑‑‑‑‑‑‑‑‑‑‑‑‑‑‑‑‑‑‑‑‑‑‑‑‑‑‑‑‑‑‑‑‑‑‑‑‑‑‑‑‑‑‑‑‑‑‑‑‑‑‑‑‑‑‑

Table

Summary of Severity for Selected Microscopic Observations

Unscheduled Euthanasias and Deaths

Test Article (dosage) 1M 2M 3M 4M 1F 2F 3F 4F

‑‑‑‑‑‑‑‑‑‑‑‑‑‑‑‑‑‑‑‑‑‑‑‑‑‑‑ ‑‑‑‑‑‑‑‑ ‑‑ ‑‑ ‑‑ ‑‑ ‑‑ ‑‑ ‑‑ ‑‑

Benzonatate (PF‑00345410) mg/kg/day 0 10 30 90 0 5 15 50

‑‑‑‑‑‑‑‑‑‑‑‑‑‑‑‑‑‑‑‑‑‑‑‑‑‑‑‑‑‑‑‑‑‑‑‑‑‑‑‑‑‑‑‑‑‑‑‑‑‑‑‑‑‑‑‑‑‑‑‑‑‑‑‑‑‑‑‑‑‑‑‑‑‑‑‑‑‑‑‑‑‑‑‑‑‑‑‑‑‑‑‑‑‑‑‑‑‑‑‑‑‑‑‑‑‑‑‑

Tissue/ Group/Subgroup/Sex: 1/1/M 2/1/M 3/1/M 4/1/M 1/1/F 2/1/F 3/1/F 4/1/F

Observation Number of Animals:  22  26  19  27  30  27  26  25

‑‑‑‑‑‑‑‑‑‑‑‑‑‑‑‑‑‑‑‑‑‑‑‑‑‑‑‑‑‑‑‑‑‑‑‑‑‑‑‑‑‑‑‑‑‑‑‑‑‑‑‑‑‑‑‑‑‑‑‑‑‑‑‑‑‑‑‑‑‑‑‑‑‑‑‑‑‑‑‑‑‑‑‑‑‑‑‑‑‑‑‑‑‑‑‑‑‑‑‑‑‑‑‑‑‑‑‑

Liver Number Examined:  22  26  19  27  30  27  26  25

Unremarkable:   4  10   4   4   2   3   2   2

Angiectasis

finding not present ‑  22  26  18  27  26  26  24  24

minimal 1   0   0   1   0   3   0   1   0

slight 2   0   0   0   0   1   1   0   1

moderate 3   0   0   0   0   0   0   1   0

Total Incidence:   0   0   1   0   4   1   2   1

Average Severity:   0.0   0.0   1.0   0.0   1.3   2.0   2.0   2.0

Barbiturate lysis

finding not present ‑  22  26  19  26  30  27  26  25

moderate 3   0   0   0   1   0   0   0   0

Total Incidence:   0   0   0   1   0   0   0   0

Average Severity:   0.0   0.0   0.0   3.0   0.0   0.0   0.0   0.0

Congestion

finding not present ‑  22  26  19  27  29  27  26  25

minimal 1   0   0   0   0   1   0   0   0

Total Incidence:   0   0   0   0   1   0   0   0

Average Severity:   0.0   0.0   0.0   0.0   1.0   0.0   0.0   0.0

‑‑‑‑‑‑‑‑‑‑‑‑‑‑‑‑‑‑‑‑‑‑‑‑‑‑‑‑‑‑‑‑‑‑‑‑‑‑‑‑‑‑‑‑‑‑‑‑‑‑‑‑‑‑‑‑‑‑‑‑‑‑‑‑‑‑‑‑‑‑‑‑‑‑‑‑‑‑‑‑‑‑‑‑‑‑‑‑‑‑‑‑‑‑‑‑‑‑‑‑‑‑‑‑‑‑‑

Table

Summary of Severity for Selected Microscopic Observations

Unscheduled Euthanasias and Deaths

Test Article (dosage) 1M 2M 3M 4M 1F 2F 3F 4F

‑‑‑‑‑‑‑‑‑‑‑‑‑‑‑‑‑‑‑‑‑‑‑‑‑‑‑ ‑‑‑‑‑‑‑‑ ‑‑ ‑‑ ‑‑ ‑‑ ‑‑ ‑‑ ‑‑ ‑‑

Benzonatate (PF‑00345410) mg/kg/day 0 10 30 90 0 5 15 50

‑‑‑‑‑‑‑‑‑‑‑‑‑‑‑‑‑‑‑‑‑‑‑‑‑‑‑‑‑‑‑‑‑‑‑‑‑‑‑‑‑‑‑‑‑‑‑‑‑‑‑‑‑‑‑‑‑‑‑‑‑‑‑‑‑‑‑‑‑‑‑‑‑‑‑‑‑‑‑‑‑‑‑‑‑‑‑‑‑‑‑‑‑‑‑‑‑‑‑‑‑‑‑‑‑‑‑‑

Tissue/ Group/Subgroup/Sex: 1/1/M 2/1/M 3/1/M 4/1/M 1/1/F 2/1/F 3/1/F 4/1/F

Observation Number of Animals:  22  26  19  27  30  27  26  25

‑‑‑‑‑‑‑‑‑‑‑‑‑‑‑‑‑‑‑‑‑‑‑‑‑‑‑‑‑‑‑‑‑‑‑‑‑‑‑‑‑‑‑‑‑‑‑‑‑‑‑‑‑‑‑‑‑‑‑‑‑‑‑‑‑‑‑‑‑‑‑‑‑‑‑‑‑‑‑‑‑‑‑‑‑‑‑‑‑‑‑‑‑‑‑‑‑‑‑‑‑‑‑‑‑‑‑‑

Liver Number Examined:  22  26  19  27  30  27  26  25

Unremarkable:   4  10   4   4   2   3   2   2

Cyst, biliary

finding not present ‑  22  26  19  26  30  27  26  25

slight 2   0   0   0   1   0   0   0   0

Total Incidence:   0   0   0   1   0   0   0   0

Average Severity:   0.0   0.0   0.0   2.0   0.0   0.0   0.0   0.0

Fibrosis/biliary hyperplasia

finding not present ‑  17  26  15  23  24  21  20  19

minimal 1   4   0   3   1   1   1   1   1

slight 2   0   0   0   1   3   4   4   2

moderate 3   1   0   1   2   2   1   1   3

Total Incidence:   5   0   4   4   6   6   6   6

Average Severity:   1.4   0.0   1.5   2.3   2.2   2.0   2.0   2.3

‑‑‑‑‑‑‑‑‑‑‑‑‑‑‑‑‑‑‑‑‑‑‑‑‑‑‑‑‑‑‑‑‑‑‑‑‑‑‑‑‑‑‑‑‑‑‑‑‑‑‑‑‑‑‑‑‑‑‑‑‑‑‑‑‑‑‑‑‑‑‑‑‑‑‑‑‑‑‑‑‑‑‑‑‑‑‑‑‑‑‑‑‑‑‑‑‑‑‑‑‑‑‑‑‑‑‑

Table

Summary of Severity for Selected Microscopic Observations

Unscheduled Euthanasias and Deaths

Test Article (dosage) 1M 2M 3M 4M 1F 2F 3F 4F

‑‑‑‑‑‑‑‑‑‑‑‑‑‑‑‑‑‑‑‑‑‑‑‑‑‑‑ ‑‑‑‑‑‑‑‑ ‑‑ ‑‑ ‑‑ ‑‑ ‑‑ ‑‑ ‑‑ ‑‑

Benzonatate (PF‑00345410) mg/kg/day 0 10 30 90 0 5 15 50

‑‑‑‑‑‑‑‑‑‑‑‑‑‑‑‑‑‑‑‑‑‑‑‑‑‑‑‑‑‑‑‑‑‑‑‑‑‑‑‑‑‑‑‑‑‑‑‑‑‑‑‑‑‑‑‑‑‑‑‑‑‑‑‑‑‑‑‑‑‑‑‑‑‑‑‑‑‑‑‑‑‑‑‑‑‑‑‑‑‑‑‑‑‑‑‑‑‑‑‑‑‑‑‑‑‑‑‑

Tissue/ Group/Subgroup/Sex: 1/1/M 2/1/M 3/1/M 4/1/M 1/1/F 2/1/F 3/1/F 4/1/F

Observation Number of Animals:  22  26  19  27  30  27  26  25

‑‑‑‑‑‑‑‑‑‑‑‑‑‑‑‑‑‑‑‑‑‑‑‑‑‑‑‑‑‑‑‑‑‑‑‑‑‑‑‑‑‑‑‑‑‑‑‑‑‑‑‑‑‑‑‑‑‑‑‑‑‑‑‑‑‑‑‑‑‑‑‑‑‑‑‑‑‑‑‑‑‑‑‑‑‑‑‑‑‑‑‑‑‑‑‑‑‑‑‑‑‑‑‑‑‑‑‑

Liver Number Examined:  22  26  19  27  30  27  26  25

Unremarkable:   4  10   4   4   2   3   2   2

Focus, cellular alteration,

basophilic

finding not present ‑  16  22  11  15   8   6   6   6

minimal 1   4   4   2   6   3   2   4   2

slight 2   0   0   4   2   8   3   5   5

moderate 3   2   0   1   4   5  10   5   4

marked 4   0   0   1   0   6   5   4   7

severe 5   0   0   0   0   0   1   2   1

Total Incidence:   6   4   8  12  22  21  20  19

Average Severity:   1.7   1.0   2.1   1.8   2.6   3.0   2.8   3.0

Focus, cellular alteration, clear

finding not present ‑  22  25  19  27  30  27  26  24

slight 2   0   0   0   0   0   0   0   1

moderate 3   0   1   0   0   0   0   0   0

Total Incidence:   0   1   0   0   0   0   0   1

Average Severity:   0.0   3.0   0.0   0.0   0.0   0.0   0.0   2.0

‑‑‑‑‑‑‑‑‑‑‑‑‑‑‑‑‑‑‑‑‑‑‑‑‑‑‑‑‑‑‑‑‑‑‑‑‑‑‑‑‑‑‑‑‑‑‑‑‑‑‑‑‑‑‑‑‑‑‑‑‑‑‑‑‑‑‑‑‑‑‑‑‑‑‑‑‑‑‑‑‑‑‑‑‑‑‑‑‑‑‑‑‑‑‑‑‑‑‑‑‑‑‑‑‑‑‑

Table

Summary of Severity for Selected Microscopic Observations

Unscheduled Euthanasias and Deaths

Test Article (dosage) 1M 2M 3M 4M 1F 2F 3F 4F

‑‑‑‑‑‑‑‑‑‑‑‑‑‑‑‑‑‑‑‑‑‑‑‑‑‑‑ ‑‑‑‑‑‑‑‑ ‑‑ ‑‑ ‑‑ ‑‑ ‑‑ ‑‑ ‑‑ ‑‑

Benzonatate (PF‑00345410) mg/kg/day 0 10 30 90 0 5 15 50

‑‑‑‑‑‑‑‑‑‑‑‑‑‑‑‑‑‑‑‑‑‑‑‑‑‑‑‑‑‑‑‑‑‑‑‑‑‑‑‑‑‑‑‑‑‑‑‑‑‑‑‑‑‑‑‑‑‑‑‑‑‑‑‑‑‑‑‑‑‑‑‑‑‑‑‑‑‑‑‑‑‑‑‑‑‑‑‑‑‑‑‑‑‑‑‑‑‑‑‑‑‑‑‑‑‑‑‑

Tissue/ Group/Subgroup/Sex: 1/1/M 2/1/M 3/1/M 4/1/M 1/1/F 2/1/F 3/1/F 4/1/F

Observation Number of Animals:  22  26  19  27  30  27  26  25

‑‑‑‑‑‑‑‑‑‑‑‑‑‑‑‑‑‑‑‑‑‑‑‑‑‑‑‑‑‑‑‑‑‑‑‑‑‑‑‑‑‑‑‑‑‑‑‑‑‑‑‑‑‑‑‑‑‑‑‑‑‑‑‑‑‑‑‑‑‑‑‑‑‑‑‑‑‑‑‑‑‑‑‑‑‑‑‑‑‑‑‑‑‑‑‑‑‑‑‑‑‑‑‑‑‑‑‑

Liver Number Examined:  22  26  19  27  30  27  26  25

Unremarkable:   4  10   4   4   2   3   2   2

Focus, cellular alteration,

eosinophilic

finding not present ‑  18  23  15  23  28  25  26  25

minimal 1   1   1   3   0   1   0   0   0

slight 2   3   1   0   2   1   1   0   0

moderate 3   0   0   1   1   0   1   0   0

marked 4   0   1   0   1   0   0   0   0

Total Incidence:   4   3   4   4   2   2   0   0

Average Severity:   1.8   2.3   1.5   2.8   1.5   2.5   0.0   0.0

Hematocyst

finding not present ‑  22  26  19  27  30  27  26  24

moderate 3   0   0   0   0   0   0   0   1

Total Incidence:   0   0   0   0   0   0   0   1

Average Severity:   0.0   0.0   0.0   0.0   0.0   0.0   0.0   3.0

Hematopoiesis, extramedullary

finding not present ‑  20  24  19  27  23  24  21  24

minimal 1   1   2   0   0   4   1   2   1

slight 2   1   0   0   0   2   2   3   0

moderate 3   0   0   0   0   1   0   0   0

Total Incidence:   2   2   0   0   7   3   5   1

Average Severity:   1.5   1.0   0.0   0.0   1.6   1.7   1.6   1.0

‑‑‑‑‑‑‑‑‑‑‑‑‑‑‑‑‑‑‑‑‑‑‑‑‑‑‑‑‑‑‑‑‑‑‑‑‑‑‑‑‑‑‑‑‑‑‑‑‑‑‑‑‑‑‑‑‑‑‑‑‑‑‑‑‑‑‑‑‑‑‑‑‑‑‑‑‑‑‑‑‑‑‑‑‑‑‑‑‑‑‑‑‑‑‑‑‑‑‑‑‑‑‑‑‑‑‑

Table

Summary of Severity for Selected Microscopic Observations

Unscheduled Euthanasias and Deaths

Test Article (dosage) 1M 2M 3M 4M 1F 2F 3F 4F

‑‑‑‑‑‑‑‑‑‑‑‑‑‑‑‑‑‑‑‑‑‑‑‑‑‑‑ ‑‑‑‑‑‑‑‑ ‑‑ ‑‑ ‑‑ ‑‑ ‑‑ ‑‑ ‑‑ ‑‑

Benzonatate (PF‑00345410) mg/kg/day 0 10 30 90 0 5 15 50

‑‑‑‑‑‑‑‑‑‑‑‑‑‑‑‑‑‑‑‑‑‑‑‑‑‑‑‑‑‑‑‑‑‑‑‑‑‑‑‑‑‑‑‑‑‑‑‑‑‑‑‑‑‑‑‑‑‑‑‑‑‑‑‑‑‑‑‑‑‑‑‑‑‑‑‑‑‑‑‑‑‑‑‑‑‑‑‑‑‑‑‑‑‑‑‑‑‑‑‑‑‑‑‑‑‑‑‑

Tissue/ Group/Subgroup/Sex: 1/1/M 2/1/M 3/1/M 4/1/M 1/1/F 2/1/F 3/1/F 4/1/F

Observation Number of Animals:  22  26  19  27  30  27  26  25

‑‑‑‑‑‑‑‑‑‑‑‑‑‑‑‑‑‑‑‑‑‑‑‑‑‑‑‑‑‑‑‑‑‑‑‑‑‑‑‑‑‑‑‑‑‑‑‑‑‑‑‑‑‑‑‑‑‑‑‑‑‑‑‑‑‑‑‑‑‑‑‑‑‑‑‑‑‑‑‑‑‑‑‑‑‑‑‑‑‑‑‑‑‑‑‑‑‑‑‑‑‑‑‑‑‑‑‑

Liver Number Examined:  22  26  19  27  30  27  26  25

Unremarkable:   4  10   4   4   2   3   2   2

Hemorrhage, centrilobular

finding not present ‑  22  26  18  27  30  27  26  24

slight 2   0   0   0   0   0   0   0   1

moderate 3   0   0   1   0   0   0   0   0

Total Incidence:   0   0   1   0   0   0   0   1

Average Severity:   0.0   0.0   3.0   0.0   0.0   0.0   0.0   2.0

Hyperplasia, Kupffer cell

finding not present ‑  22  26  19  26  30  26  25  24

minimal 1   0   0   0   1   0   0   1   0

slight 2   0   0   0   0   0   1   0   1

Total Incidence:   0   0   0   1   0   1   1   1

Average Severity:   0.0   0.0   0.0   1.0   0.0   2.0   1.0   2.0

Infiltrate, mononuclear cell

finding not present ‑  12  21  10  14  22  15  16  15

minimal 1   9   3   8  11   6   9   7  10

slight 2   1   2   1   2   2   3   3   0

Total Incidence:  10   5   9  13   8  12  10  10

Average Severity:   1.1   1.4   1.1   1.2   1.3   1.3   1.3   1.0

‑‑‑‑‑‑‑‑‑‑‑‑‑‑‑‑‑‑‑‑‑‑‑‑‑‑‑‑‑‑‑‑‑‑‑‑‑‑‑‑‑‑‑‑‑‑‑‑‑‑‑‑‑‑‑‑‑‑‑‑‑‑‑‑‑‑‑‑‑‑‑‑‑‑‑‑‑‑‑‑‑‑‑‑‑‑‑‑‑‑‑‑‑‑‑‑‑‑‑‑‑‑‑‑‑‑‑

Table

Summary of Severity for Selected Microscopic Observations

Unscheduled Euthanasias and Deaths

Test Article (dosage) 1M 2M 3M 4M 1F 2F 3F 4F

‑‑‑‑‑‑‑‑‑‑‑‑‑‑‑‑‑‑‑‑‑‑‑‑‑‑‑ ‑‑‑‑‑‑‑‑ ‑‑ ‑‑ ‑‑ ‑‑ ‑‑ ‑‑ ‑‑ ‑‑

Benzonatate (PF‑00345410) mg/kg/day 0 10 30 90 0 5 15 50

‑‑‑‑‑‑‑‑‑‑‑‑‑‑‑‑‑‑‑‑‑‑‑‑‑‑‑‑‑‑‑‑‑‑‑‑‑‑‑‑‑‑‑‑‑‑‑‑‑‑‑‑‑‑‑‑‑‑‑‑‑‑‑‑‑‑‑‑‑‑‑‑‑‑‑‑‑‑‑‑‑‑‑‑‑‑‑‑‑‑‑‑‑‑‑‑‑‑‑‑‑‑‑‑‑‑‑‑

Tissue/ Group/Subgroup/Sex: 1/1/M 2/1/M 3/1/M 4/1/M 1/1/F 2/1/F 3/1/F 4/1/F

Observation Number of Animals:  22  26  19  27  30  27  26  25

‑‑‑‑‑‑‑‑‑‑‑‑‑‑‑‑‑‑‑‑‑‑‑‑‑‑‑‑‑‑‑‑‑‑‑‑‑‑‑‑‑‑‑‑‑‑‑‑‑‑‑‑‑‑‑‑‑‑‑‑‑‑‑‑‑‑‑‑‑‑‑‑‑‑‑‑‑‑‑‑‑‑‑‑‑‑‑‑‑‑‑‑‑‑‑‑‑‑‑‑‑‑‑‑‑‑‑‑

Liver Number Examined:  22  26  19  27  30  27  26  25

Unremarkable:   4  10   4   4   2   3   2   2

Karyomegaly, hepatocyte

finding not present ‑  22  26  19  27  29  27  24  24

slight 2   0   0   0   0   1   0   2   0

moderate 3   0   0   0   0   0   0   0   1

Total Incidence:   0   0   0   0   1   0   2   1

Average Severity:   0.0   0.0   0.0   0.0   2.0   0.0   2.0   3.0

Mitosis, hepatocyte, increased

finding not present ‑  22  26  19  26  28  25  24  24

minimal 1   0   0   0   0   2   1   1   0

slight 2   0   0   0   1   0   1   1   1

Total Incidence:   0   0   0   1   2   2   2   1

Average Severity:   0.0   0.0   0.0   2.0   1.0   1.5   1.5   2.0

Multinucleated hepatocyte,

increased

finding not present ‑  22  26  19  27  29  27  26  25

minimal 1   0   0   0   0   1   0   0   0

Total Incidence:   0   0   0   0   1   0   0   0

Average Severity:   0.0   0.0   0.0   0.0   1.0   0.0   0.0   0.0

‑‑‑‑‑‑‑‑‑‑‑‑‑‑‑‑‑‑‑‑‑‑‑‑‑‑‑‑‑‑‑‑‑‑‑‑‑‑‑‑‑‑‑‑‑‑‑‑‑‑‑‑‑‑‑‑‑‑‑‑‑‑‑‑‑‑‑‑‑‑‑‑‑‑‑‑‑‑‑‑‑‑‑‑‑‑‑‑‑‑‑‑‑‑‑‑‑‑‑‑‑‑‑‑‑‑‑

Table

Summary of Severity for Selected Microscopic Observations

Unscheduled Euthanasias and Deaths

Test Article (dosage) 1M 2M 3M 4M 1F 2F 3F 4F

‑‑‑‑‑‑‑‑‑‑‑‑‑‑‑‑‑‑‑‑‑‑‑‑‑‑‑ ‑‑‑‑‑‑‑‑ ‑‑ ‑‑ ‑‑ ‑‑ ‑‑ ‑‑ ‑‑ ‑‑

Benzonatate (PF‑00345410) mg/kg/day 0 10 30 90 0 5 15 50

‑‑‑‑‑‑‑‑‑‑‑‑‑‑‑‑‑‑‑‑‑‑‑‑‑‑‑‑‑‑‑‑‑‑‑‑‑‑‑‑‑‑‑‑‑‑‑‑‑‑‑‑‑‑‑‑‑‑‑‑‑‑‑‑‑‑‑‑‑‑‑‑‑‑‑‑‑‑‑‑‑‑‑‑‑‑‑‑‑‑‑‑‑‑‑‑‑‑‑‑‑‑‑‑‑‑‑‑

Tissue/ Group/Subgroup/Sex: 1/1/M 2/1/M 3/1/M 4/1/M 1/1/F 2/1/F 3/1/F 4/1/F

Observation Number of Animals:  22  26  19  27  30  27  26  25

‑‑‑‑‑‑‑‑‑‑‑‑‑‑‑‑‑‑‑‑‑‑‑‑‑‑‑‑‑‑‑‑‑‑‑‑‑‑‑‑‑‑‑‑‑‑‑‑‑‑‑‑‑‑‑‑‑‑‑‑‑‑‑‑‑‑‑‑‑‑‑‑‑‑‑‑‑‑‑‑‑‑‑‑‑‑‑‑‑‑‑‑‑‑‑‑‑‑‑‑‑‑‑‑‑‑‑‑

Liver Number Examined:  22  26  19  27  30  27  26  25

Unremarkable:   4  10   4   4   2   3   2   2

Necrosis, hepatocyte

finding not present ‑  19  23  17  23  28  25  22  25

minimal 1   3   2   1   4   2   1   3   0

slight 2   0   1   1   0   0   1   0   0

moderate 3   0   0   0   0   0   0   1   0

Total Incidence:   3   3   2   4   2   2   4   0

Average Severity:   1.0   1.3   1.5   1.0   1.0   1.5   1.5   0.0

Necrosis/degeneration,

hepatocyte, centrilobular

finding not present ‑  21  25  17  26  29  25  25  23

slight 2   1   0   1   1   1   2   0   0

moderate 3   0   0   0   0   0   0   1   2

marked 4   0   1   1   0   0   0   0   0

Total Incidence:   1   1   2   1   1   2   1   2

Average Severity:   2.0   4.0   3.0   2.0   2.0   2.0   3.0   3.0

Pigment, increased

finding not present ‑  21  26  19  27  30  24  26  24

slight 2   1   0   0   0   0   2   0   0

moderate 3   0   0   0   0   0   1   0   1

Total Incidence:   1   0   0   0   0   3   0   1

Average Severity:   2.0   0.0   0.0   0.0   0.0   2.3   0.0   3.0

‑‑‑‑‑‑‑‑‑‑‑‑‑‑‑‑‑‑‑‑‑‑‑‑‑‑‑‑‑‑‑‑‑‑‑‑‑‑‑‑‑‑‑‑‑‑‑‑‑‑‑‑‑‑‑‑‑‑‑‑‑‑‑‑‑‑‑‑‑‑‑‑‑‑‑‑‑‑‑‑‑‑‑‑‑‑‑‑‑‑‑‑‑‑‑‑‑‑‑‑‑‑‑‑‑‑‑

Table

Summary of Severity for Selected Microscopic Observations

Unscheduled Euthanasias and Deaths

Test Article (dosage) 1M 2M 3M 4M 1F 2F 3F 4F

‑‑‑‑‑‑‑‑‑‑‑‑‑‑‑‑‑‑‑‑‑‑‑‑‑‑‑ ‑‑‑‑‑‑‑‑ ‑‑ ‑‑ ‑‑ ‑‑ ‑‑ ‑‑ ‑‑ ‑‑

Benzonatate (PF‑00345410) mg/kg/day 0 10 30 90 0 5 15 50

‑‑‑‑‑‑‑‑‑‑‑‑‑‑‑‑‑‑‑‑‑‑‑‑‑‑‑‑‑‑‑‑‑‑‑‑‑‑‑‑‑‑‑‑‑‑‑‑‑‑‑‑‑‑‑‑‑‑‑‑‑‑‑‑‑‑‑‑‑‑‑‑‑‑‑‑‑‑‑‑‑‑‑‑‑‑‑‑‑‑‑‑‑‑‑‑‑‑‑‑‑‑‑‑‑‑‑‑

Tissue/ Group/Subgroup/Sex: 1/1/M 2/1/M 3/1/M 4/1/M 1/1/F 2/1/F 3/1/F 4/1/F

Observation Number of Animals:  22  26  19  27  30  27  26  25

‑‑‑‑‑‑‑‑‑‑‑‑‑‑‑‑‑‑‑‑‑‑‑‑‑‑‑‑‑‑‑‑‑‑‑‑‑‑‑‑‑‑‑‑‑‑‑‑‑‑‑‑‑‑‑‑‑‑‑‑‑‑‑‑‑‑‑‑‑‑‑‑‑‑‑‑‑‑‑‑‑‑‑‑‑‑‑‑‑‑‑‑‑‑‑‑‑‑‑‑‑‑‑‑‑‑‑‑

Liver Number Examined:  22  26  19  27  30  27  26  25

Unremarkable:   4  10   4   4   2   3   2   2

Vacuolation, increased, hepatocyte

finding not present ‑  19  21  16  23  24  24  25  20

minimal 1   0   1   0   0   1   0   0   1

slight 2   1   2   2   4   4   2   1   0

moderate 3   1   2   1   0   0   1   0   4

marked 4   1   0   0   0   1   0   0   0

Total Incidence:   3   5   3   4   6   3   1   5

Average Severity:   3.0   2.2   2.3   2.0   2.2   2.3   2.0   2.6

‑‑‑‑‑‑‑‑‑‑‑‑‑‑‑‑‑‑‑‑‑‑‑‑‑‑‑‑‑‑‑‑‑‑‑‑‑‑‑‑‑‑‑‑‑‑‑‑‑‑‑‑‑‑‑‑‑‑‑‑‑‑‑‑‑‑‑‑‑‑‑‑‑‑‑‑‑‑‑‑‑‑‑‑‑‑‑‑‑‑‑‑‑‑‑‑‑‑‑‑‑‑‑‑‑‑‑

Table

Summary of Severity for Selected Microscopic Observations

Unscheduled Euthanasias and Deaths

Test Article (dosage) 1M 2M 3M 4M 1F 2F 3F 4F

‑‑‑‑‑‑‑‑‑‑‑‑‑‑‑‑‑‑‑‑‑‑‑‑‑‑‑ ‑‑‑‑‑‑‑‑ ‑‑ ‑‑ ‑‑ ‑‑ ‑‑ ‑‑ ‑‑ ‑‑

Benzonatate (PF‑00345410) mg/kg/day 0 10 30 90 0 5 15 50

‑‑‑‑‑‑‑‑‑‑‑‑‑‑‑‑‑‑‑‑‑‑‑‑‑‑‑‑‑‑‑‑‑‑‑‑‑‑‑‑‑‑‑‑‑‑‑‑‑‑‑‑‑‑‑‑‑‑‑‑‑‑‑‑‑‑‑‑‑‑‑‑‑‑‑‑‑‑‑‑‑‑‑‑‑‑‑‑‑‑‑‑‑‑‑‑‑‑‑‑‑‑‑‑‑‑‑‑

Tissue/ Group/Subgroup/Sex: 1/1/M 2/1/M 3/1/M 4/1/M 1/1/F 2/1/F 3/1/F 4/1/F

Observation Number of Animals:  22  26  19  27  30  27  26  25

‑‑‑‑‑‑‑‑‑‑‑‑‑‑‑‑‑‑‑‑‑‑‑‑‑‑‑‑‑‑‑‑‑‑‑‑‑‑‑‑‑‑‑‑‑‑‑‑‑‑‑‑‑‑‑‑‑‑‑‑‑‑‑‑‑‑‑‑‑‑‑‑‑‑‑‑‑‑‑‑‑‑‑‑‑‑‑‑‑‑‑‑‑‑‑‑‑‑‑‑‑‑‑‑‑‑‑‑

Lung Number Examined:  22  26  19  27  30  27  26  25

Unremarkable:  11  16  11  16  24  19  22  21

Granuloma

finding not present ‑  20  24  18  26  30  27  26  25

minimal 1   2   2   1   1   0   0   0   0

Total Incidence:   2   2   1   1   0   0   0   0

Average Severity:   1.0   1.0   1.0   1.0   0.0   0.0   0.0   0.0

Hemorrhage

finding not present ‑  18  25  18  26  29  27  26  25

minimal 1   1   1   1   1   0   0   0   0

slight 2   0   0   0   0   1   0   0   0

moderate 3   3   0   0   0   0   0   0   0

Total Incidence:   4   1   1   1   1   0   0   0

Average Severity:   2.5   1.0   1.0   1.0   2.0   0.0   0.0   0.0

Hyperplasia, epithelium, alveolus

finding not present ‑  19  26  19  27  30  27  26  25

slight 2   1   0   0   0   0   0   0   0

moderate 3   2   0   0   0   0   0   0   0

Total Incidence:   3   0   0   0   0   0   0   0

Average Severity:   2.7   0.0   0.0   0.0   0.0   0.0   0.0   0.0

‑‑‑‑‑‑‑‑‑‑‑‑‑‑‑‑‑‑‑‑‑‑‑‑‑‑‑‑‑‑‑‑‑‑‑‑‑‑‑‑‑‑‑‑‑‑‑‑‑‑‑‑‑‑‑‑‑‑‑‑‑‑‑‑‑‑‑‑‑‑‑‑‑‑‑‑‑‑‑‑‑‑‑‑‑‑‑‑‑‑‑‑‑‑‑‑‑‑‑‑‑‑‑‑‑‑‑

Table

Summary of Severity for Selected Microscopic Observations

Unscheduled Euthanasias and Deaths

Test Article (dosage) 1M 2M 3M 4M 1F 2F 3F 4F

‑‑‑‑‑‑‑‑‑‑‑‑‑‑‑‑‑‑‑‑‑‑‑‑‑‑‑ ‑‑‑‑‑‑‑‑ ‑‑ ‑‑ ‑‑ ‑‑ ‑‑ ‑‑ ‑‑ ‑‑

Benzonatate (PF‑00345410) mg/kg/day 0 10 30 90 0 5 15 50

‑‑‑‑‑‑‑‑‑‑‑‑‑‑‑‑‑‑‑‑‑‑‑‑‑‑‑‑‑‑‑‑‑‑‑‑‑‑‑‑‑‑‑‑‑‑‑‑‑‑‑‑‑‑‑‑‑‑‑‑‑‑‑‑‑‑‑‑‑‑‑‑‑‑‑‑‑‑‑‑‑‑‑‑‑‑‑‑‑‑‑‑‑‑‑‑‑‑‑‑‑‑‑‑‑‑‑‑

Tissue/ Group/Subgroup/Sex: 1/1/M 2/1/M 3/1/M 4/1/M 1/1/F 2/1/F 3/1/F 4/1/F

Observation Number of Animals:  22  26  19  27  30  27  26  25

‑‑‑‑‑‑‑‑‑‑‑‑‑‑‑‑‑‑‑‑‑‑‑‑‑‑‑‑‑‑‑‑‑‑‑‑‑‑‑‑‑‑‑‑‑‑‑‑‑‑‑‑‑‑‑‑‑‑‑‑‑‑‑‑‑‑‑‑‑‑‑‑‑‑‑‑‑‑‑‑‑‑‑‑‑‑‑‑‑‑‑‑‑‑‑‑‑‑‑‑‑‑‑‑‑‑‑‑

Lung Number Examined:  22  26  19  27  30  27  26  25

Unremarkable:  11  16  11  16  24  19  22  21

Infiltrate, macrophages, alveolus

finding not present ‑  20  25  19  25  30  27  26  25

minimal 1   0   0   0   2   0   0   0   0

moderate 3   2   1   0   0   0   0   0   0

Total Incidence:   2   1   0   2   0   0   0   0

Average Severity:   3.0   3.0   0.0   1.0   0.0   0.0   0.0   0.0

Infiltrate, macrophages,

vacuolated

finding not present ‑  18  21  14  19  27  22  23  22

minimal 1   3   5   3   6   2   2   3   3

slight 2   1   0   2   2   0   3   0   0

moderate 3   0   0   0   0   1   0   0   0

Total Incidence:   4   5   5   8   3   5   3   3

Average Severity:   1.3   1.0   1.4   1.3   1.7   1.6   1.0   1.0

Inflammation, acute

finding not present ‑  22  24  19  27  29  27  26  25

minimal 1   0   2   0   0   0   0   0   0

slight 2   0   0   0   0   1   0   0   0

Total Incidence:   0   2   0   0   1   0   0   0

Average Severity:   0.0   1.0   0.0   0.0   2.0   0.0   0.0   0.0

‑‑‑‑‑‑‑‑‑‑‑‑‑‑‑‑‑‑‑‑‑‑‑‑‑‑‑‑‑‑‑‑‑‑‑‑‑‑‑‑‑‑‑‑‑‑‑‑‑‑‑‑‑‑‑‑‑‑‑‑‑‑‑‑‑‑‑‑‑‑‑‑‑‑‑‑‑‑‑‑‑‑‑‑‑‑‑‑‑‑‑‑‑‑‑‑‑‑‑‑‑‑‑‑‑‑‑

Table

Summary of Severity for Selected Microscopic Observations

Unscheduled Euthanasias and Deaths

Test Article (dosage) 1M 2M 3M 4M 1F 2F 3F 4F

‑‑‑‑‑‑‑‑‑‑‑‑‑‑‑‑‑‑‑‑‑‑‑‑‑‑‑ ‑‑‑‑‑‑‑‑ ‑‑ ‑‑ ‑‑ ‑‑ ‑‑ ‑‑ ‑‑ ‑‑

Benzonatate (PF‑00345410) mg/kg/day 0 10 30 90 0 5 15 50

‑‑‑‑‑‑‑‑‑‑‑‑‑‑‑‑‑‑‑‑‑‑‑‑‑‑‑‑‑‑‑‑‑‑‑‑‑‑‑‑‑‑‑‑‑‑‑‑‑‑‑‑‑‑‑‑‑‑‑‑‑‑‑‑‑‑‑‑‑‑‑‑‑‑‑‑‑‑‑‑‑‑‑‑‑‑‑‑‑‑‑‑‑‑‑‑‑‑‑‑‑‑‑‑‑‑‑‑

Tissue/ Group/Subgroup/Sex: 1/1/M 2/1/M 3/1/M 4/1/M 1/1/F 2/1/F 3/1/F 4/1/F

Observation Number of Animals:  22  26  19  27  30  27  26  25

‑‑‑‑‑‑‑‑‑‑‑‑‑‑‑‑‑‑‑‑‑‑‑‑‑‑‑‑‑‑‑‑‑‑‑‑‑‑‑‑‑‑‑‑‑‑‑‑‑‑‑‑‑‑‑‑‑‑‑‑‑‑‑‑‑‑‑‑‑‑‑‑‑‑‑‑‑‑‑‑‑‑‑‑‑‑‑‑‑‑‑‑‑‑‑‑‑‑‑‑‑‑‑‑‑‑‑‑

Lung Number Examined:  22  26  19  27  30  27  26  25

Unremarkable:  11  16  11  16  24  19  22  21

Inflammation, mixed cell

finding not present ‑  19  25  17  27  30  27  25  25

minimal 1   1   0   2   0   0   0   1   0

slight 2   2   1   0   0   0   0   0   0

Total Incidence:   3   1   2   0   0   0   1   0

Average Severity:   1.7   2.0   1.0   0.0   0.0   0.0   1.0   0.0

Leukocytosis

finding not present ‑  22  26  19  27  30  27  25  25

marked 4   0   0   0   0   0   0   1   0

Total Incidence:   0   0   0   0   0   0   1   0

Average Severity:   0.0   0.0   0.0   0.0   0.0   0.0   4.0   0.0

Pigment

finding not present ‑  22  25  19  27  30  27  26  25

slight 2   0   1   0   0   0   0   0   0

Total Incidence:   0   1   0   0   0   0   0   0

Average Severity:   0.0   2.0   0.0   0.0   0.0   0.0   0.0   0.0

‑‑‑‑‑‑‑‑‑‑‑‑‑‑‑‑‑‑‑‑‑‑‑‑‑‑‑‑‑‑‑‑‑‑‑‑‑‑‑‑‑‑‑‑‑‑‑‑‑‑‑‑‑‑‑‑‑‑‑‑‑‑‑‑‑‑‑‑‑‑‑‑‑‑‑‑‑‑‑‑‑‑‑‑‑‑‑‑‑‑‑‑‑‑‑‑‑‑‑‑‑‑‑‑‑‑‑

Table

Summary of Severity for Selected Microscopic Observations

Unscheduled Euthanasias and Deaths

Test Article (dosage) 1M 2M 3M 4M 1F 2F 3F 4F

‑‑‑‑‑‑‑‑‑‑‑‑‑‑‑‑‑‑‑‑‑‑‑‑‑‑‑ ‑‑‑‑‑‑‑‑ ‑‑ ‑‑ ‑‑ ‑‑ ‑‑ ‑‑ ‑‑ ‑‑

Benzonatate (PF‑00345410) mg/kg/day 0 10 30 90 0 5 15 50

‑‑‑‑‑‑‑‑‑‑‑‑‑‑‑‑‑‑‑‑‑‑‑‑‑‑‑‑‑‑‑‑‑‑‑‑‑‑‑‑‑‑‑‑‑‑‑‑‑‑‑‑‑‑‑‑‑‑‑‑‑‑‑‑‑‑‑‑‑‑‑‑‑‑‑‑‑‑‑‑‑‑‑‑‑‑‑‑‑‑‑‑‑‑‑‑‑‑‑‑‑‑‑‑‑‑‑‑

Tissue/ Group/Subgroup/Sex: 1/1/M 2/1/M 3/1/M 4/1/M 1/1/F 2/1/F 3/1/F 4/1/F

Observation Number of Animals:  22  26  19  27  30  27  26  25

‑‑‑‑‑‑‑‑‑‑‑‑‑‑‑‑‑‑‑‑‑‑‑‑‑‑‑‑‑‑‑‑‑‑‑‑‑‑‑‑‑‑‑‑‑‑‑‑‑‑‑‑‑‑‑‑‑‑‑‑‑‑‑‑‑‑‑‑‑‑‑‑‑‑‑‑‑‑‑‑‑‑‑‑‑‑‑‑‑‑‑‑‑‑‑‑‑‑‑‑‑‑‑‑‑‑‑‑

Lung Number Examined:  22  26  19  27  30  27  26  25

Unremarkable:  11  16  11  16  24  19  22  21

Thrombus

finding not present ‑  22  26  19  27  29  27  26  25

moderate 3   0   0   0   0   1   0   0   0

Total Incidence:   0   0   0   0   1   0   0   0

Average Severity:   0.0   0.0   0.0   0.0   3.0   0.0   0.0   0.0

Lymph Node,

Inguinal Number Examined: 16 21 12 23 27 22 18 21

Unremarkable: 15 19 12 22 25 20 17 18

Erythrocytes, sinus

finding not present ‑  16  21  12  23  27  22  18  20

slight 2   0   0   0   0   0   0   0   1

Total Incidence:   0   0   0   0   0   0   0   1

Average Severity:   0.0   0.0   0.0   0.0   0.0   0.0   0.0   2.0

Hyperplasia, lymphocytes

finding not present ‑  16  19  12  22  25  20  18  20

minimal 1   0   2   0   0   2   1   0   0

slight 2   0   0   0   1   0   1   0   1

Total Incidence:   0   2   0   1   2   2   0   1

Average Severity:   0.0   1.0   0.0   2.0   1.0   1.5   0.0   2.0

‑‑‑‑‑‑‑‑‑‑‑‑‑‑‑‑‑‑‑‑‑‑‑‑‑‑‑‑‑‑‑‑‑‑‑‑‑‑‑‑‑‑‑‑‑‑‑‑‑‑‑‑‑‑‑‑‑‑‑‑‑‑‑‑‑‑‑‑‑‑‑‑‑‑‑‑‑‑‑‑‑‑‑‑‑‑‑‑‑‑‑‑‑‑‑‑‑‑‑‑‑‑‑‑‑‑‑

Table

Summary of Severity for Selected Microscopic Observations

Unscheduled Euthanasias and Deaths

Test Article (dosage) 1M 2M 3M 4M 1F 2F 3F 4F

‑‑‑‑‑‑‑‑‑‑‑‑‑‑‑‑‑‑‑‑‑‑‑‑‑‑‑ ‑‑‑‑‑‑‑‑ ‑‑ ‑‑ ‑‑ ‑‑ ‑‑ ‑‑ ‑‑ ‑‑

Benzonatate (PF‑00345410) mg/kg/day 0 10 30 90 0 5 15 50

‑‑‑‑‑‑‑‑‑‑‑‑‑‑‑‑‑‑‑‑‑‑‑‑‑‑‑‑‑‑‑‑‑‑‑‑‑‑‑‑‑‑‑‑‑‑‑‑‑‑‑‑‑‑‑‑‑‑‑‑‑‑‑‑‑‑‑‑‑‑‑‑‑‑‑‑‑‑‑‑‑‑‑‑‑‑‑‑‑‑‑‑‑‑‑‑‑‑‑‑‑‑‑‑‑‑‑‑

Tissue/ Group/Subgroup/Sex: 1/1/M 2/1/M 3/1/M 4/1/M 1/1/F 2/1/F 3/1/F 4/1/F

Observation Number of Animals:  22  26  19  27  30  27  26  25

‑‑‑‑‑‑‑‑‑‑‑‑‑‑‑‑‑‑‑‑‑‑‑‑‑‑‑‑‑‑‑‑‑‑‑‑‑‑‑‑‑‑‑‑‑‑‑‑‑‑‑‑‑‑‑‑‑‑‑‑‑‑‑‑‑‑‑‑‑‑‑‑‑‑‑‑‑‑‑‑‑‑‑‑‑‑‑‑‑‑‑‑‑‑‑‑‑‑‑‑‑‑‑‑‑‑‑‑

Lymph Node,

Mesenteric Number Examined: 22 26 19 27 30 27 26 25

Unremarkable: 19 21 16 20 27 23 26 24

Dilatation, sinus

finding not present ‑  22  25  19  27  30  27  26  25

slight 2   0   1   0   0   0   0   0   0

Total Incidence:   0   1   0   0   0   0   0   0

Average Severity:   0.0   2.0   0.0   0.0   0.0   0.0   0.0   0.0

Erythrocytes, sinus, increased

finding not present ‑  21  26  19  24  28  26  26  24

minimal 1   0   0   0   1   0   0   0   0

slight 2   1   0   0   2   1   0   0   0

moderate 3   0   0   0   0   0   1   0   1

marked 4   0   0   0   0   1   0   0   0

Total Incidence:   1   0   0   3   2   1   0   1

Average Severity:   2.0   0.0   0.0   1.7   3.0   3.0   0.0   3.0

Hyperplasia, lymphocytes

finding not present ‑  21  26  19  27  29  26  26  25

minimal 1   1   0   0   0   0   1   0   0

moderate 3   0   0   0   0   1   0   0   0

Total Incidence:   1   0   0   0   1   1   0   0

Average Severity:   1.0   0.0   0.0   0.0   3.0   1.0   0.0   0.0

‑‑‑‑‑‑‑‑‑‑‑‑‑‑‑‑‑‑‑‑‑‑‑‑‑‑‑‑‑‑‑‑‑‑‑‑‑‑‑‑‑‑‑‑‑‑‑‑‑‑‑‑‑‑‑‑‑‑‑‑‑‑‑‑‑‑‑‑‑‑‑‑‑‑‑‑‑‑‑‑‑‑‑‑‑‑‑‑‑‑‑‑‑‑‑‑‑‑‑‑‑‑‑‑‑‑‑

Table

Summary of Severity for Selected Microscopic Observations

Unscheduled Euthanasias and Deaths

Test Article (dosage) 1M 2M 3M 4M 1F 2F 3F 4F

‑‑‑‑‑‑‑‑‑‑‑‑‑‑‑‑‑‑‑‑‑‑‑‑‑‑‑ ‑‑‑‑‑‑‑‑ ‑‑ ‑‑ ‑‑ ‑‑ ‑‑ ‑‑ ‑‑ ‑‑

Benzonatate (PF‑00345410) mg/kg/day 0 10 30 90 0 5 15 50

‑‑‑‑‑‑‑‑‑‑‑‑‑‑‑‑‑‑‑‑‑‑‑‑‑‑‑‑‑‑‑‑‑‑‑‑‑‑‑‑‑‑‑‑‑‑‑‑‑‑‑‑‑‑‑‑‑‑‑‑‑‑‑‑‑‑‑‑‑‑‑‑‑‑‑‑‑‑‑‑‑‑‑‑‑‑‑‑‑‑‑‑‑‑‑‑‑‑‑‑‑‑‑‑‑‑‑‑

Tissue/ Group/Subgroup/Sex: 1/1/M 2/1/M 3/1/M 4/1/M 1/1/F 2/1/F 3/1/F 4/1/F

Observation Number of Animals:  22  26  19  27  30  27  26  25

‑‑‑‑‑‑‑‑‑‑‑‑‑‑‑‑‑‑‑‑‑‑‑‑‑‑‑‑‑‑‑‑‑‑‑‑‑‑‑‑‑‑‑‑‑‑‑‑‑‑‑‑‑‑‑‑‑‑‑‑‑‑‑‑‑‑‑‑‑‑‑‑‑‑‑‑‑‑‑‑‑‑‑‑‑‑‑‑‑‑‑‑‑‑‑‑‑‑‑‑‑‑‑‑‑‑‑‑

Lymph Node,

Mesenteric Number Examined: 22 26 19 27 30 27 26 25

Unremarkable: 19 21 16 20 27 23 26 24

Necrosis, lymphocytes

finding not present ‑  22  26  19  27  29  26  26  25

slight 2   0   0   0   0   1   1   0   0

Total Incidence:   0   0   0   0   1   1   0   0

Average Severity:   0.0   0.0   0.0   0.0   2.0   2.0   0.0   0.0

‑‑‑‑‑‑‑‑‑‑‑‑‑‑‑‑‑‑‑‑‑‑‑‑‑‑‑‑‑‑‑‑‑‑‑‑‑‑‑‑‑‑‑‑‑‑‑‑‑‑‑‑‑‑‑‑‑‑‑‑‑‑‑‑‑‑‑‑‑‑‑‑‑‑‑‑‑‑‑‑‑‑‑‑‑‑‑‑‑‑‑‑‑‑‑‑‑‑‑‑‑‑‑‑‑‑‑

Table

Summary of Severity for Selected Microscopic Observations

Unscheduled Euthanasias and Deaths

Test Article (dosage) 1M 2M 3M 4M 1F 2F 3F 4F

‑‑‑‑‑‑‑‑‑‑‑‑‑‑‑‑‑‑‑‑‑‑‑‑‑‑‑ ‑‑‑‑‑‑‑‑ ‑‑ ‑‑ ‑‑ ‑‑ ‑‑ ‑‑ ‑‑ ‑‑

Benzonatate (PF‑00345410) mg/kg/day 0 10 30 90 0 5 15 50

‑‑‑‑‑‑‑‑‑‑‑‑‑‑‑‑‑‑‑‑‑‑‑‑‑‑‑‑‑‑‑‑‑‑‑‑‑‑‑‑‑‑‑‑‑‑‑‑‑‑‑‑‑‑‑‑‑‑‑‑‑‑‑‑‑‑‑‑‑‑‑‑‑‑‑‑‑‑‑‑‑‑‑‑‑‑‑‑‑‑‑‑‑‑‑‑‑‑‑‑‑‑‑‑‑‑‑‑

Tissue/ Group/Subgroup/Sex: 1/1/M 2/1/M 3/1/M 4/1/M 1/1/F 2/1/F 3/1/F 4/1/F

Observation Number of Animals:  22  26  19  27  30  27  26  25

‑‑‑‑‑‑‑‑‑‑‑‑‑‑‑‑‑‑‑‑‑‑‑‑‑‑‑‑‑‑‑‑‑‑‑‑‑‑‑‑‑‑‑‑‑‑‑‑‑‑‑‑‑‑‑‑‑‑‑‑‑‑‑‑‑‑‑‑‑‑‑‑‑‑‑‑‑‑‑‑‑‑‑‑‑‑‑‑‑‑‑‑‑‑‑‑‑‑‑‑‑‑‑‑‑‑‑‑

Lymph Node, Other Number Examined:   2   1   2   3   0   1   0   3

Unremarkable:   0   0   0   0   0   0   0   0

Abscess

finding not present ‑   2   1   2   3   0   1   0   2

moderate 3   0   0   0   0   0   0   0   1

Total Incidence:   0   0   0   0   0   0   0   1

Average Severity:   0.0   0.0   0.0   0.0   0.0   0.0   0.0   3.0

Erythrocytes, sinus, increased

finding not present ‑   0   0   2   2   0   0   0   1

minimal 1   1   0   0   0   0   0   0   0

slight 2   1   1   0   1   0   1   0   2

Total Incidence:   2   1   0   1   0   1   0   2

Average Severity:   1.5   2.0   0.0   2.0   0.0   2.0   0.0   2.0

Hyperplasia, lymphocytes

finding not present ‑   2   1   1   2   0   1   0   2

slight 2   0   0   1   1   0   0   0   1

Total Incidence:   0   0   1   1   0   0   0   1

Average Severity:   0.0   0.0   2.0   2.0   0.0   0.0   0.0   2.0

‑‑‑‑‑‑‑‑‑‑‑‑‑‑‑‑‑‑‑‑‑‑‑‑‑‑‑‑‑‑‑‑‑‑‑‑‑‑‑‑‑‑‑‑‑‑‑‑‑‑‑‑‑‑‑‑‑‑‑‑‑‑‑‑‑‑‑‑‑‑‑‑‑‑‑‑‑‑‑‑‑‑‑‑‑‑‑‑‑‑‑‑‑‑‑‑‑‑‑‑‑‑‑‑‑‑‑

Table

Summary of Severity for Selected Microscopic Observations

Unscheduled Euthanasias and Deaths

Test Article (dosage) 1M 2M 3M 4M 1F 2F 3F 4F

‑‑‑‑‑‑‑‑‑‑‑‑‑‑‑‑‑‑‑‑‑‑‑‑‑‑‑ ‑‑‑‑‑‑‑‑ ‑‑ ‑‑ ‑‑ ‑‑ ‑‑ ‑‑ ‑‑ ‑‑

Benzonatate (PF‑00345410) mg/kg/day 0 10 30 90 0 5 15 50

‑‑‑‑‑‑‑‑‑‑‑‑‑‑‑‑‑‑‑‑‑‑‑‑‑‑‑‑‑‑‑‑‑‑‑‑‑‑‑‑‑‑‑‑‑‑‑‑‑‑‑‑‑‑‑‑‑‑‑‑‑‑‑‑‑‑‑‑‑‑‑‑‑‑‑‑‑‑‑‑‑‑‑‑‑‑‑‑‑‑‑‑‑‑‑‑‑‑‑‑‑‑‑‑‑‑‑‑

Tissue/ Group/Subgroup/Sex: 1/1/M 2/1/M 3/1/M 4/1/M 1/1/F 2/1/F 3/1/F 4/1/F

Observation Number of Animals:  22  26  19  27  30  27  26  25

‑‑‑‑‑‑‑‑‑‑‑‑‑‑‑‑‑‑‑‑‑‑‑‑‑‑‑‑‑‑‑‑‑‑‑‑‑‑‑‑‑‑‑‑‑‑‑‑‑‑‑‑‑‑‑‑‑‑‑‑‑‑‑‑‑‑‑‑‑‑‑‑‑‑‑‑‑‑‑‑‑‑‑‑‑‑‑‑‑‑‑‑‑‑‑‑‑‑‑‑‑‑‑‑‑‑‑‑

Lymph Node, Other Number Examined:   2   1   2   3   0   1   0   3

Unremarkable:   0   0   0   0   0   0   0   0

Infiltrate, neutrophils

finding not present ‑   2   1   2   3   0   1   0   2

moderate 3   0   0   0   0   0   0   0   1

Total Incidence:   0   0   0   0   0   0   0   1

Average Severity:   0.0   0.0   0.0   0.0   0.0   0.0   0.0   3.0

Pigment

finding not present ‑   2   1   2   3   0   0   0   3

moderate 3   0   0   0   0   0   1   0   0

Total Incidence:   0   0   0   0   0   1   0   0

Average Severity:   0.0   0.0   0.0   0.0   0.0   3.0   0.0   0.0

‑‑‑‑‑‑‑‑‑‑‑‑‑‑‑‑‑‑‑‑‑‑‑‑‑‑‑‑‑‑‑‑‑‑‑‑‑‑‑‑‑‑‑‑‑‑‑‑‑‑‑‑‑‑‑‑‑‑‑‑‑‑‑‑‑‑‑‑‑‑‑‑‑‑‑‑‑‑‑‑‑‑‑‑‑‑‑‑‑‑‑‑‑‑‑‑‑‑‑‑‑‑‑‑‑‑‑

Table

Summary of Severity for Selected Microscopic Observations

Unscheduled Euthanasias and Deaths

Test Article (dosage) 1M 2M 3M 4M 1F 2F 3F 4F

‑‑‑‑‑‑‑‑‑‑‑‑‑‑‑‑‑‑‑‑‑‑‑‑‑‑‑ ‑‑‑‑‑‑‑‑ ‑‑ ‑‑ ‑‑ ‑‑ ‑‑ ‑‑ ‑‑ ‑‑

Benzonatate (PF‑00345410) mg/kg/day 0 10 30 90 0 5 15 50

‑‑‑‑‑‑‑‑‑‑‑‑‑‑‑‑‑‑‑‑‑‑‑‑‑‑‑‑‑‑‑‑‑‑‑‑‑‑‑‑‑‑‑‑‑‑‑‑‑‑‑‑‑‑‑‑‑‑‑‑‑‑‑‑‑‑‑‑‑‑‑‑‑‑‑‑‑‑‑‑‑‑‑‑‑‑‑‑‑‑‑‑‑‑‑‑‑‑‑‑‑‑‑‑‑‑‑‑

Tissue/ Group/Subgroup/Sex: 1/1/M 2/1/M 3/1/M 4/1/M 1/1/F 2/1/F 3/1/F 4/1/F

Observation Number of Animals:  22  26  19  27  30  27  26  25

‑‑‑‑‑‑‑‑‑‑‑‑‑‑‑‑‑‑‑‑‑‑‑‑‑‑‑‑‑‑‑‑‑‑‑‑‑‑‑‑‑‑‑‑‑‑‑‑‑‑‑‑‑‑‑‑‑‑‑‑‑‑‑‑‑‑‑‑‑‑‑‑‑‑‑‑‑‑‑‑‑‑‑‑‑‑‑‑‑‑‑‑‑‑‑‑‑‑‑‑‑‑‑‑‑‑‑‑

Mammary Gland Number Examined:  22  24  17  21  30  27  26  24

Unremarkable:  20  24  16  18  10   8  11   7

Abscess

finding not present ‑  22  24  17  21  29  27  26  24

marked 4   0   0   0   0   1   0   0   0

Total Incidence:   0   0   0   0   1   0   0   0

Average Severity:   0.0   0.0   0.0   0.0   4.0   0.0   0.0   0.0

Cyst/ectasia with inflammation

finding not present ‑  21  24  16  18  14  13  12  11

minimal 1   1   0   1   2   6   3   9   8

slight 2   0   0   0   1   8   8   4   4

moderate 3   0   0   0   0   2   3   0   1

marked 4   0   0   0   0   0   0   1   0

Total Incidence:   1   0   1   3  16  14  14  13

Average Severity:   1.0   0.0   1.0   1.3   1.8   2.0   1.5   1.5

Granuloma

finding not present ‑  22  24  17  21  29  27  26  24

marked 4   0   0   0   0   1   0   0   0

Total Incidence:   0   0   0   0   1   0   0   0

Average Severity:   0.0   0.0   0.0   0.0   4.0   0.0   0.0   0.0

‑‑‑‑‑‑‑‑‑‑‑‑‑‑‑‑‑‑‑‑‑‑‑‑‑‑‑‑‑‑‑‑‑‑‑‑‑‑‑‑‑‑‑‑‑‑‑‑‑‑‑‑‑‑‑‑‑‑‑‑‑‑‑‑‑‑‑‑‑‑‑‑‑‑‑‑‑‑‑‑‑‑‑‑‑‑‑‑‑‑‑‑‑‑‑‑‑‑‑‑‑‑‑‑‑‑‑

Table

Summary of Severity for Selected Microscopic Observations

Unscheduled Euthanasias and Deaths

Test Article (dosage) 1M 2M 3M 4M 1F 2F 3F 4F

‑‑‑‑‑‑‑‑‑‑‑‑‑‑‑‑‑‑‑‑‑‑‑‑‑‑‑ ‑‑‑‑‑‑‑‑ ‑‑ ‑‑ ‑‑ ‑‑ ‑‑ ‑‑ ‑‑ ‑‑

Benzonatate (PF‑00345410) mg/kg/day 0 10 30 90 0 5 15 50

‑‑‑‑‑‑‑‑‑‑‑‑‑‑‑‑‑‑‑‑‑‑‑‑‑‑‑‑‑‑‑‑‑‑‑‑‑‑‑‑‑‑‑‑‑‑‑‑‑‑‑‑‑‑‑‑‑‑‑‑‑‑‑‑‑‑‑‑‑‑‑‑‑‑‑‑‑‑‑‑‑‑‑‑‑‑‑‑‑‑‑‑‑‑‑‑‑‑‑‑‑‑‑‑‑‑‑‑

Tissue/ Group/Subgroup/Sex: 1/1/M 2/1/M 3/1/M 4/1/M 1/1/F 2/1/F 3/1/F 4/1/F

Observation Number of Animals:  22  26  19  27  30  27  26  25

‑‑‑‑‑‑‑‑‑‑‑‑‑‑‑‑‑‑‑‑‑‑‑‑‑‑‑‑‑‑‑‑‑‑‑‑‑‑‑‑‑‑‑‑‑‑‑‑‑‑‑‑‑‑‑‑‑‑‑‑‑‑‑‑‑‑‑‑‑‑‑‑‑‑‑‑‑‑‑‑‑‑‑‑‑‑‑‑‑‑‑‑‑‑‑‑‑‑‑‑‑‑‑‑‑‑‑‑

Mammary Gland Number Examined:  22  24  17  21  30  27  26  24

Unremarkable:  20  24  16  18  10   8  11   7

Hyperplasia

finding not present ‑  22  24  17  20  17  16  16  14

minimal 1   0   0   0   1   8   6   7   7

slight 2   0   0   0   0   5   3   2   3

moderate 3   0   0   0   0   0   1   1   0

marked 4   0   0   0   0   0   1   0   0

Total Incidence:   0   0   0   1  13  11  10  10

Average Severity:   0.0   0.0   0.0   1.0   1.4   1.7   1.4   1.3

Mammary Gland,

Male Number Examined: 2 0 1 0 0 0 0 0

Unremarkable: 2 0 1 0 0 0 0 0

Mandibular

Salivary Gland Number Examined: 22 26 19 27 30 27 26 25

Unremarkable: 22 26 19 26 30 26 26 25

Inflammation, chronic‑active

finding not present ‑  22  26  19  27  30  26  26  25

slight 2   0   0   0   0   0   1   0   0

Total Incidence:   0   0   0   0   0   1   0   0

Average Severity:   0.0   0.0   0.0   0.0   0.0   2.0   0.0   0.0

‑‑‑‑‑‑‑‑‑‑‑‑‑‑‑‑‑‑‑‑‑‑‑‑‑‑‑‑‑‑‑‑‑‑‑‑‑‑‑‑‑‑‑‑‑‑‑‑‑‑‑‑‑‑‑‑‑‑‑‑‑‑‑‑‑‑‑‑‑‑‑‑‑‑‑‑‑‑‑‑‑‑‑‑‑‑‑‑‑‑‑‑‑‑‑‑‑‑‑‑‑‑‑‑‑‑‑

Table

Summary of Severity for Selected Microscopic Observations

Unscheduled Euthanasias and Deaths

Test Article (dosage) 1M 2M 3M 4M 1F 2F 3F 4F

‑‑‑‑‑‑‑‑‑‑‑‑‑‑‑‑‑‑‑‑‑‑‑‑‑‑‑ ‑‑‑‑‑‑‑‑ ‑‑ ‑‑ ‑‑ ‑‑ ‑‑ ‑‑ ‑‑ ‑‑

Benzonatate (PF‑00345410) mg/kg/day 0 10 30 90 0 5 15 50

‑‑‑‑‑‑‑‑‑‑‑‑‑‑‑‑‑‑‑‑‑‑‑‑‑‑‑‑‑‑‑‑‑‑‑‑‑‑‑‑‑‑‑‑‑‑‑‑‑‑‑‑‑‑‑‑‑‑‑‑‑‑‑‑‑‑‑‑‑‑‑‑‑‑‑‑‑‑‑‑‑‑‑‑‑‑‑‑‑‑‑‑‑‑‑‑‑‑‑‑‑‑‑‑‑‑‑‑

Tissue/ Group/Subgroup/Sex: 1/1/M 2/1/M 3/1/M 4/1/M 1/1/F 2/1/F 3/1/F 4/1/F

Observation Number of Animals:  22  26  19  27  30  27  26  25

‑‑‑‑‑‑‑‑‑‑‑‑‑‑‑‑‑‑‑‑‑‑‑‑‑‑‑‑‑‑‑‑‑‑‑‑‑‑‑‑‑‑‑‑‑‑‑‑‑‑‑‑‑‑‑‑‑‑‑‑‑‑‑‑‑‑‑‑‑‑‑‑‑‑‑‑‑‑‑‑‑‑‑‑‑‑‑‑‑‑‑‑‑‑‑‑‑‑‑‑‑‑‑‑‑‑‑‑

Marrow, Sternum Number Examined:  22  26  19  27  30  27  26  25

Unremarkable:  15  18  16  16  19  19  18  19

Hyperplasia, erythroid

finding not present ‑  22  26  19  26  29  26  26  25

minimal 1   0   0   0   0   1   0   0   0

slight 2   0   0   0   1   0   1   0   0

Total Incidence:   0   0   0   1   1   1   0   0

Average Severity:   0.0   0.0   0.0   2.0   1.0   2.0   0.0   0.0

Hyperplasia, myeloid

finding not present ‑  16  18  16  18  20  20  18  19

minimal 1   3   3   2   3   2   1   3   2

slight 2   3   5   1   6   8   5   4   4

moderate 3   0   0   0   0   0   1   1   0

Total Incidence:   6   8   3   9  10   7   8   6

Average Severity:   1.5   1.6   1.3   1.7   1.8   2.0   1.8   1.7

Mesentery Number Examined:   0   0   0   0   1   0   0   0

Unremarkable:   0   0   0   0   0   0   0   0

Hemorrhage

finding not present ‑   0   0   0   0   0   0   0   0

moderate 3   0   0   0   0   1   0   0   0

Total Incidence:   0   0   0   0   1   0   0   0

Average Severity:   0.0   0.0   0.0   0.0   3.0   0.0   0.0   0.0

‑‑‑‑‑‑‑‑‑‑‑‑‑‑‑‑‑‑‑‑‑‑‑‑‑‑‑‑‑‑‑‑‑‑‑‑‑‑‑‑‑‑‑‑‑‑‑‑‑‑‑‑‑‑‑‑‑‑‑‑‑‑‑‑‑‑‑‑‑‑‑‑‑‑‑‑‑‑‑‑‑‑‑‑‑‑‑‑‑‑‑‑‑‑‑‑‑‑‑‑‑‑‑‑‑‑‑

Table

Summary of Severity for Selected Microscopic Observations

Unscheduled Euthanasias and Deaths

Test Article (dosage) 1M 2M 3M 4M 1F 2F 3F 4F

‑‑‑‑‑‑‑‑‑‑‑‑‑‑‑‑‑‑‑‑‑‑‑‑‑‑‑ ‑‑‑‑‑‑‑‑ ‑‑ ‑‑ ‑‑ ‑‑ ‑‑ ‑‑ ‑‑ ‑‑

Benzonatate (PF‑00345410) mg/kg/day 0 10 30 90 0 5 15 50

‑‑‑‑‑‑‑‑‑‑‑‑‑‑‑‑‑‑‑‑‑‑‑‑‑‑‑‑‑‑‑‑‑‑‑‑‑‑‑‑‑‑‑‑‑‑‑‑‑‑‑‑‑‑‑‑‑‑‑‑‑‑‑‑‑‑‑‑‑‑‑‑‑‑‑‑‑‑‑‑‑‑‑‑‑‑‑‑‑‑‑‑‑‑‑‑‑‑‑‑‑‑‑‑‑‑‑‑

Tissue/ Group/Subgroup/Sex: 1/1/M 2/1/M 3/1/M 4/1/M 1/1/F 2/1/F 3/1/F 4/1/F

Observation Number of Animals:  22  26  19  27  30  27  26  25

‑‑‑‑‑‑‑‑‑‑‑‑‑‑‑‑‑‑‑‑‑‑‑‑‑‑‑‑‑‑‑‑‑‑‑‑‑‑‑‑‑‑‑‑‑‑‑‑‑‑‑‑‑‑‑‑‑‑‑‑‑‑‑‑‑‑‑‑‑‑‑‑‑‑‑‑‑‑‑‑‑‑‑‑‑‑‑‑‑‑‑‑‑‑‑‑‑‑‑‑‑‑‑‑‑‑‑‑

Muscle, Biceps

Femoris Number Examined: 22 26 19 27 30 27 26 25

Unremarkable: 21 23 17 24 30 25 22 24

Degeneration/regeneration

finding not present ‑  21  23  17  24  30  25  22  24

minimal 1   1   2   2   1   0   2   4   1

slight 2   0   1   0   1   0   0   0   0

moderate 3   0   0   0   1   0   0   0   0

Total Incidence:   1   3   2   3   0   2   4   1

Average Severity:   1.0   1.3   1.0   2.0   0.0   1.0   1.0   1.0

Muscle, Other Number Examined:   0   0   0   0   0   0   1   0

Unremarkable:   0   0   0   0   0   0   0   0

‑‑‑‑‑‑‑‑‑‑‑‑‑‑‑‑‑‑‑‑‑‑‑‑‑‑‑‑‑‑‑‑‑‑‑‑‑‑‑‑‑‑‑‑‑‑‑‑‑‑‑‑‑‑‑‑‑‑‑‑‑‑‑‑‑‑‑‑‑‑‑‑‑‑‑‑‑‑‑‑‑‑‑‑‑‑‑‑‑‑‑‑‑‑‑‑‑‑‑‑‑‑‑‑‑‑‑

Table

Summary of Severity for Selected Microscopic Observations

Unscheduled Euthanasias and Deaths

Test Article (dosage) 1M 2M 3M 4M 1F 2F 3F 4F

‑‑‑‑‑‑‑‑‑‑‑‑‑‑‑‑‑‑‑‑‑‑‑‑‑‑‑ ‑‑‑‑‑‑‑‑ ‑‑ ‑‑ ‑‑ ‑‑ ‑‑ ‑‑ ‑‑ ‑‑

Benzonatate (PF‑00345410) mg/kg/day 0 10 30 90 0 5 15 50

‑‑‑‑‑‑‑‑‑‑‑‑‑‑‑‑‑‑‑‑‑‑‑‑‑‑‑‑‑‑‑‑‑‑‑‑‑‑‑‑‑‑‑‑‑‑‑‑‑‑‑‑‑‑‑‑‑‑‑‑‑‑‑‑‑‑‑‑‑‑‑‑‑‑‑‑‑‑‑‑‑‑‑‑‑‑‑‑‑‑‑‑‑‑‑‑‑‑‑‑‑‑‑‑‑‑‑‑

Tissue/ Group/Subgroup/Sex: 1/1/M 2/1/M 3/1/M 4/1/M 1/1/F 2/1/F 3/1/F 4/1/F

Observation Number of Animals:  22  26  19  27  30  27  26  25

‑‑‑‑‑‑‑‑‑‑‑‑‑‑‑‑‑‑‑‑‑‑‑‑‑‑‑‑‑‑‑‑‑‑‑‑‑‑‑‑‑‑‑‑‑‑‑‑‑‑‑‑‑‑‑‑‑‑‑‑‑‑‑‑‑‑‑‑‑‑‑‑‑‑‑‑‑‑‑‑‑‑‑‑‑‑‑‑‑‑‑‑‑‑‑‑‑‑‑‑‑‑‑‑‑‑‑‑

Nasal Turbinate Number Examined:  22  26  19  27  29  27  25  25

Unremarkable:  21  25  19  26  29  27  23  25

Exudate, lumen

finding not present ‑  21  25  19  27  29  27  25  25

minimal 1   0   1   0   0   0   0   0   0

moderate 3   1   0   0   0   0   0   0   0

Total Incidence:   1   1   0   0   0   0   0   0

Average Severity:   3.0   1.0   0.0   0.0   0.0   0.0   0.0   0.0

Inflammation

finding not present ‑  22  26  19  26  29  27  24  25

minimal 1   0   0   0   1   0   0   0   0

slight 2   0   0   0   0   0   0   1   0

Total Incidence:   0   0   0   1   0   0   1   0

Average Severity:   0.0   0.0   0.0   1.0   0.0   0.0   2.0   0.0

Nerve, Optic Number Examined:  22  26  19  27  30  27  26  25

Unremarkable:  22  26  19  27  30  27  26  25

‑‑‑‑‑‑‑‑‑‑‑‑‑‑‑‑‑‑‑‑‑‑‑‑‑‑‑‑‑‑‑‑‑‑‑‑‑‑‑‑‑‑‑‑‑‑‑‑‑‑‑‑‑‑‑‑‑‑‑‑‑‑‑‑‑‑‑‑‑‑‑‑‑‑‑‑‑‑‑‑‑‑‑‑‑‑‑‑‑‑‑‑‑‑‑‑‑‑‑‑‑‑‑‑‑‑‑

Table

Summary of Severity for Selected Microscopic Observations

Unscheduled Euthanasias and Deaths

Test Article (dosage) 1M 2M 3M 4M 1F 2F 3F 4F

‑‑‑‑‑‑‑‑‑‑‑‑‑‑‑‑‑‑‑‑‑‑‑‑‑‑‑ ‑‑‑‑‑‑‑‑ ‑‑ ‑‑ ‑‑ ‑‑ ‑‑ ‑‑ ‑‑ ‑‑

Benzonatate (PF‑00345410) mg/kg/day 0 10 30 90 0 5 15 50

‑‑‑‑‑‑‑‑‑‑‑‑‑‑‑‑‑‑‑‑‑‑‑‑‑‑‑‑‑‑‑‑‑‑‑‑‑‑‑‑‑‑‑‑‑‑‑‑‑‑‑‑‑‑‑‑‑‑‑‑‑‑‑‑‑‑‑‑‑‑‑‑‑‑‑‑‑‑‑‑‑‑‑‑‑‑‑‑‑‑‑‑‑‑‑‑‑‑‑‑‑‑‑‑‑‑‑‑

Tissue/ Group/Subgroup/Sex: 1/1/M 2/1/M 3/1/M 4/1/M 1/1/F 2/1/F 3/1/F 4/1/F

Observation Number of Animals:  22  26  19  27  30  27  26  25

‑‑‑‑‑‑‑‑‑‑‑‑‑‑‑‑‑‑‑‑‑‑‑‑‑‑‑‑‑‑‑‑‑‑‑‑‑‑‑‑‑‑‑‑‑‑‑‑‑‑‑‑‑‑‑‑‑‑‑‑‑‑‑‑‑‑‑‑‑‑‑‑‑‑‑‑‑‑‑‑‑‑‑‑‑‑‑‑‑‑‑‑‑‑‑‑‑‑‑‑‑‑‑‑‑‑‑‑

Nerve, Sciatic Number Examined:  22  26  19  27  30  27  26  25

Unremarkable:  22  26  19  26  30  27  26  25

Degeneration, axon, increased

finding not present ‑  22  26  19  26  30  27  26  25

slight 2   0   0   0   1   0   0   0   0

Total Incidence:   0   0   0   1   0   0   0   0

Average Severity:   0.0   0.0   0.0   2.0   0.0   0.0   0.0   0.0

‑‑‑‑‑‑‑‑‑‑‑‑‑‑‑‑‑‑‑‑‑‑‑‑‑‑‑‑‑‑‑‑‑‑‑‑‑‑‑‑‑‑‑‑‑‑‑‑‑‑‑‑‑‑‑‑‑‑‑‑‑‑‑‑‑‑‑‑‑‑‑‑‑‑‑‑‑‑‑‑‑‑‑‑‑‑‑‑‑‑‑‑‑‑‑‑‑‑‑‑‑‑‑‑‑‑‑

Table

Summary of Severity for Selected Microscopic Observations

Unscheduled Euthanasias and Deaths

Test Article (dosage) 1M 2M 3M 4M 1F 2F 3F 4F

‑‑‑‑‑‑‑‑‑‑‑‑‑‑‑‑‑‑‑‑‑‑‑‑‑‑‑ ‑‑‑‑‑‑‑‑ ‑‑ ‑‑ ‑‑ ‑‑ ‑‑ ‑‑ ‑‑ ‑‑

Benzonatate (PF‑00345410) mg/kg/day 0 10 30 90 0 5 15 50

‑‑‑‑‑‑‑‑‑‑‑‑‑‑‑‑‑‑‑‑‑‑‑‑‑‑‑‑‑‑‑‑‑‑‑‑‑‑‑‑‑‑‑‑‑‑‑‑‑‑‑‑‑‑‑‑‑‑‑‑‑‑‑‑‑‑‑‑‑‑‑‑‑‑‑‑‑‑‑‑‑‑‑‑‑‑‑‑‑‑‑‑‑‑‑‑‑‑‑‑‑‑‑‑‑‑‑‑

Tissue/ Group/Subgroup/Sex: 1/1/M 2/1/M 3/1/M 4/1/M 1/1/F 2/1/F 3/1/F 4/1/F

Observation Number of Animals:  22  26  19  27  30  27  26  25

‑‑‑‑‑‑‑‑‑‑‑‑‑‑‑‑‑‑‑‑‑‑‑‑‑‑‑‑‑‑‑‑‑‑‑‑‑‑‑‑‑‑‑‑‑‑‑‑‑‑‑‑‑‑‑‑‑‑‑‑‑‑‑‑‑‑‑‑‑‑‑‑‑‑‑‑‑‑‑‑‑‑‑‑‑‑‑‑‑‑‑‑‑‑‑‑‑‑‑‑‑‑‑‑‑‑‑‑

Ovary Number Examined:   0   0   0   0  30  27  26  25

Unremarkable:   0   0   0   0  24  17  20  22

Cyst, bursa

finding not present ‑   0   0   0   0  29  24  26  25

minimal 1   0   0   0   0   0   1   0   0

slight 2   0   0   0   0   1   2   0   0

Total Incidence:   0   0   0   0   1   3   0   0

Average Severity:   0.0   0.0   0.0   0.0   2.0   1.7   0.0   0.0

Cyst, corpus luteum

finding not present ‑   0   0   0   0  30  27  25  25

slight 2   0   0   0   0   0   0   1   0

Total Incidence:   0   0   0   0   0   0   1   0

Average Severity:   0.0   0.0   0.0   0.0   0.0   0.0   2.0   0.0

Cyst, parovarian

finding not present ‑   0   0   0   0  27  24  26  24

minimal 1   0   0   0   0   0   1   0   0

slight 2   0   0   0   0   2   0   0   1

moderate 3   0   0   0   0   1   2   0   0

Total Incidence:   0   0   0   0   3   3   0   1

Average Severity:   0.0   0.0   0.0   0.0   2.3   2.3   0.0   2.0

‑‑‑‑‑‑‑‑‑‑‑‑‑‑‑‑‑‑‑‑‑‑‑‑‑‑‑‑‑‑‑‑‑‑‑‑‑‑‑‑‑‑‑‑‑‑‑‑‑‑‑‑‑‑‑‑‑‑‑‑‑‑‑‑‑‑‑‑‑‑‑‑‑‑‑‑‑‑‑‑‑‑‑‑‑‑‑‑‑‑‑‑‑‑‑‑‑‑‑‑‑‑‑‑‑‑‑

Table

Summary of Severity for Selected Microscopic Observations

Unscheduled Euthanasias and Deaths

Test Article (dosage) 1M 2M 3M 4M 1F 2F 3F 4F

‑‑‑‑‑‑‑‑‑‑‑‑‑‑‑‑‑‑‑‑‑‑‑‑‑‑‑ ‑‑‑‑‑‑‑‑ ‑‑ ‑‑ ‑‑ ‑‑ ‑‑ ‑‑ ‑‑ ‑‑

Benzonatate (PF‑00345410) mg/kg/day 0 10 30 90 0 5 15 50

‑‑‑‑‑‑‑‑‑‑‑‑‑‑‑‑‑‑‑‑‑‑‑‑‑‑‑‑‑‑‑‑‑‑‑‑‑‑‑‑‑‑‑‑‑‑‑‑‑‑‑‑‑‑‑‑‑‑‑‑‑‑‑‑‑‑‑‑‑‑‑‑‑‑‑‑‑‑‑‑‑‑‑‑‑‑‑‑‑‑‑‑‑‑‑‑‑‑‑‑‑‑‑‑‑‑‑‑

Tissue/ Group/Subgroup/Sex: 1/1/M 2/1/M 3/1/M 4/1/M 1/1/F 2/1/F 3/1/F 4/1/F

Observation Number of Animals:  22  26  19  27  30  27  26  25

‑‑‑‑‑‑‑‑‑‑‑‑‑‑‑‑‑‑‑‑‑‑‑‑‑‑‑‑‑‑‑‑‑‑‑‑‑‑‑‑‑‑‑‑‑‑‑‑‑‑‑‑‑‑‑‑‑‑‑‑‑‑‑‑‑‑‑‑‑‑‑‑‑‑‑‑‑‑‑‑‑‑‑‑‑‑‑‑‑‑‑‑‑‑‑‑‑‑‑‑‑‑‑‑‑‑‑‑

Ovary Number Examined:   0   0   0   0  30  27  26  25

Unremarkable:   0   0   0   0  24  17  20  22

Hyperplasia, interstitial cell

finding not present ‑   0   0   0   0  28  24  22  23

minimal 1   0   0   0   0   0   1   1   1

slight 2   0   0   0   0   2   2   2   1

moderate 3   0   0   0   0   0   0   1   0

Total Incidence:   0   0   0   0   2   3   4   2

Average Severity:   0.0   0.0   0.0   0.0   2.0   1.7   2.0   1.5

Oviduct Number Examined:   0   0   0   0  30  27  26  25

Unremarkable:   0   0   0   0  30  27  26  25

‑‑‑‑‑‑‑‑‑‑‑‑‑‑‑‑‑‑‑‑‑‑‑‑‑‑‑‑‑‑‑‑‑‑‑‑‑‑‑‑‑‑‑‑‑‑‑‑‑‑‑‑‑‑‑‑‑‑‑‑‑‑‑‑‑‑‑‑‑‑‑‑‑‑‑‑‑‑‑‑‑‑‑‑‑‑‑‑‑‑‑‑‑‑‑‑‑‑‑‑‑‑‑‑‑‑‑

Table

Summary of Severity for Selected Microscopic Observations

Unscheduled Euthanasias and Deaths

Test Article (dosage) 1M 2M 3M 4M 1F 2F 3F 4F

‑‑‑‑‑‑‑‑‑‑‑‑‑‑‑‑‑‑‑‑‑‑‑‑‑‑‑ ‑‑‑‑‑‑‑‑ ‑‑ ‑‑ ‑‑ ‑‑ ‑‑ ‑‑ ‑‑ ‑‑

Benzonatate (PF‑00345410) mg/kg/day 0 10 30 90 0 5 15 50

‑‑‑‑‑‑‑‑‑‑‑‑‑‑‑‑‑‑‑‑‑‑‑‑‑‑‑‑‑‑‑‑‑‑‑‑‑‑‑‑‑‑‑‑‑‑‑‑‑‑‑‑‑‑‑‑‑‑‑‑‑‑‑‑‑‑‑‑‑‑‑‑‑‑‑‑‑‑‑‑‑‑‑‑‑‑‑‑‑‑‑‑‑‑‑‑‑‑‑‑‑‑‑‑‑‑‑‑

Tissue/ Group/Subgroup/Sex: 1/1/M 2/1/M 3/1/M 4/1/M 1/1/F 2/1/F 3/1/F 4/1/F

Observation Number of Animals:  22  26  19  27  30  27  26  25

‑‑‑‑‑‑‑‑‑‑‑‑‑‑‑‑‑‑‑‑‑‑‑‑‑‑‑‑‑‑‑‑‑‑‑‑‑‑‑‑‑‑‑‑‑‑‑‑‑‑‑‑‑‑‑‑‑‑‑‑‑‑‑‑‑‑‑‑‑‑‑‑‑‑‑‑‑‑‑‑‑‑‑‑‑‑‑‑‑‑‑‑‑‑‑‑‑‑‑‑‑‑‑‑‑‑‑‑

Pancreas Number Examined:  22  26  19  27  30  27  26  25

Unremarkable:   5   8   1   8  13  12  14  16

Alteration, basophilic

finding not present ‑  20  26  17  26  29  27  24  24

minimal 1   1   0   1   0   1   0   2   1

slight 2   1   0   1   1   0   0   0   0

Total Incidence:   2   0   2   1   1   0   2   1

Average Severity:   1.5   0.0   1.5   2.0   1.0   0.0   1.0   1.0

Atrophy, acinar

finding not present ‑  19  25  19  25  29  25  25  24

minimal 1   0   0   0   2   0   1   1   0

slight 2   3   1   0   0   0   1   0   1

marked 4   0   0   0   0   1   0   0   0

Total Incidence:   3   1   0   2   1   2   1   1

Average Severity:   2.0   2.0   0.0   1.0   4.0   1.5   1.0   2.0

Depletion, zymogen

finding not present ‑  21  25  17  27  28  26  25  25

minimal 1   0   0   0   0   0   0   1   0

slight 2   1   1   2   0   2   1   0   0

Total Incidence:   1   1   2   0   2   1   1   0

Average Severity:   2.0   2.0   2.0   0.0   2.0   2.0   1.0   0.0

‑‑‑‑‑‑‑‑‑‑‑‑‑‑‑‑‑‑‑‑‑‑‑‑‑‑‑‑‑‑‑‑‑‑‑‑‑‑‑‑‑‑‑‑‑‑‑‑‑‑‑‑‑‑‑‑‑‑‑‑‑‑‑‑‑‑‑‑‑‑‑‑‑‑‑‑‑‑‑‑‑‑‑‑‑‑‑‑‑‑‑‑‑‑‑‑‑‑‑‑‑‑‑‑‑‑‑

Table

Summary of Severity for Selected Microscopic Observations

Unscheduled Euthanasias and Deaths

Test Article (dosage) 1M 2M 3M 4M 1F 2F 3F 4F

‑‑‑‑‑‑‑‑‑‑‑‑‑‑‑‑‑‑‑‑‑‑‑‑‑‑‑ ‑‑‑‑‑‑‑‑ ‑‑ ‑‑ ‑‑ ‑‑ ‑‑ ‑‑ ‑‑ ‑‑

Benzonatate (PF‑00345410) mg/kg/day 0 10 30 90 0 5 15 50

‑‑‑‑‑‑‑‑‑‑‑‑‑‑‑‑‑‑‑‑‑‑‑‑‑‑‑‑‑‑‑‑‑‑‑‑‑‑‑‑‑‑‑‑‑‑‑‑‑‑‑‑‑‑‑‑‑‑‑‑‑‑‑‑‑‑‑‑‑‑‑‑‑‑‑‑‑‑‑‑‑‑‑‑‑‑‑‑‑‑‑‑‑‑‑‑‑‑‑‑‑‑‑‑‑‑‑‑

Tissue/ Group/Subgroup/Sex: 1/1/M 2/1/M 3/1/M 4/1/M 1/1/F 2/1/F 3/1/F 4/1/F

Observation Number of Animals:  22  26  19  27  30  27  26  25

‑‑‑‑‑‑‑‑‑‑‑‑‑‑‑‑‑‑‑‑‑‑‑‑‑‑‑‑‑‑‑‑‑‑‑‑‑‑‑‑‑‑‑‑‑‑‑‑‑‑‑‑‑‑‑‑‑‑‑‑‑‑‑‑‑‑‑‑‑‑‑‑‑‑‑‑‑‑‑‑‑‑‑‑‑‑‑‑‑‑‑‑‑‑‑‑‑‑‑‑‑‑‑‑‑‑‑‑

Pancreas Number Examined:  22  26  19  27  30  27  26  25

Unremarkable:   5   8   1   8  13  12  14  16

Hyperplasia, acinar cell

finding not present ‑  22  26  19  25  30  27  26  25

slight 2   0   0   0   1   0   0   0   0

moderate 3   0   0   0   1   0   0   0   0

Total Incidence:   0   0   0   2   0   0   0   0

Average Severity:   0.0   0.0   0.0   2.5   0.0   0.0   0.0   0.0

Hyperplasia, islet cell

finding not present ‑   7   9   2  11  21  16  20  19

minimal 1   7   9   7   7   7   4   3   5

slight 2   6   7   7   6   2   5   1   1

moderate 3   2   1   3   2   0   2   2   0

marked 4   0   0   0   1   0   0   0   0

Total Incidence:  15  17  17  16   9  11   6   6

Average Severity:   1.7   1.5   1.8   1.8   1.2   1.8   1.8   1.2

Infiltrate, mononuclear cell

finding not present ‑  21  23  17  24  28  24  23  24

minimal 1   0   2   2   3   2   3   2   1

slight 2   1   1   0   0   0   0   1   0

Total Incidence:   1   3   2   3   2   3   3   1

Average Severity:   2.0   1.3   1.0   1.0   1.0   1.0   1.3   1.0

‑‑‑‑‑‑‑‑‑‑‑‑‑‑‑‑‑‑‑‑‑‑‑‑‑‑‑‑‑‑‑‑‑‑‑‑‑‑‑‑‑‑‑‑‑‑‑‑‑‑‑‑‑‑‑‑‑‑‑‑‑‑‑‑‑‑‑‑‑‑‑‑‑‑‑‑‑‑‑‑‑‑‑‑‑‑‑‑‑‑‑‑‑‑‑‑‑‑‑‑‑‑‑‑‑‑‑

Table

Summary of Severity for Selected Microscopic Observations

Unscheduled Euthanasias and Deaths

Test Article (dosage) 1M 2M 3M 4M 1F 2F 3F 4F

‑‑‑‑‑‑‑‑‑‑‑‑‑‑‑‑‑‑‑‑‑‑‑‑‑‑‑ ‑‑‑‑‑‑‑‑ ‑‑ ‑‑ ‑‑ ‑‑ ‑‑ ‑‑ ‑‑ ‑‑

Benzonatate (PF‑00345410) mg/kg/day 0 10 30 90 0 5 15 50

‑‑‑‑‑‑‑‑‑‑‑‑‑‑‑‑‑‑‑‑‑‑‑‑‑‑‑‑‑‑‑‑‑‑‑‑‑‑‑‑‑‑‑‑‑‑‑‑‑‑‑‑‑‑‑‑‑‑‑‑‑‑‑‑‑‑‑‑‑‑‑‑‑‑‑‑‑‑‑‑‑‑‑‑‑‑‑‑‑‑‑‑‑‑‑‑‑‑‑‑‑‑‑‑‑‑‑‑

Tissue/ Group/Subgroup/Sex: 1/1/M 2/1/M 3/1/M 4/1/M 1/1/F 2/1/F 3/1/F 4/1/F

Observation Number of Animals:  22  26  19  27  30  27  26  25

‑‑‑‑‑‑‑‑‑‑‑‑‑‑‑‑‑‑‑‑‑‑‑‑‑‑‑‑‑‑‑‑‑‑‑‑‑‑‑‑‑‑‑‑‑‑‑‑‑‑‑‑‑‑‑‑‑‑‑‑‑‑‑‑‑‑‑‑‑‑‑‑‑‑‑‑‑‑‑‑‑‑‑‑‑‑‑‑‑‑‑‑‑‑‑‑‑‑‑‑‑‑‑‑‑‑‑‑

Pancreas Number Examined:  22  26  19  27  30  27  26  25

Unremarkable:   5   8   1   8  13  12  14  16

Inflammation, chronic

finding not present ‑  20  25  18  23  27  25  26  23

minimal 1   2   0   0   4   1   1   0   2

slight 2   0   1   1   0   1   1   0   0

moderate 3   0   0   0   0   1   0   0   0

Total Incidence:   2   1   1   4   3   2   0   2

Average Severity:   1.0   2.0   2.0   1.0   2.0   1.5   0.0   1.0

Parathyroid Number Examined:  21  25  19  25  29  27  26  24

Unremarkable:  21  23  18  24  27  27  26  24

Hyperplasia

finding not present ‑  21  23  18  24  27  27  26  24

slight 2   0   2   1   1   1   0   0   0

moderate 3   0   0   0   0   1   0   0   0

Total Incidence:   0   2   1   1   2   0   0   0

Average Severity:   0.0   2.0   2.0   2.0   2.5   0.0   0.0   0.0

‑‑‑‑‑‑‑‑‑‑‑‑‑‑‑‑‑‑‑‑‑‑‑‑‑‑‑‑‑‑‑‑‑‑‑‑‑‑‑‑‑‑‑‑‑‑‑‑‑‑‑‑‑‑‑‑‑‑‑‑‑‑‑‑‑‑‑‑‑‑‑‑‑‑‑‑‑‑‑‑‑‑‑‑‑‑‑‑‑‑‑‑‑‑‑‑‑‑‑‑‑‑‑‑‑‑‑

Table

Summary of Severity for Selected Microscopic Observations

Unscheduled Euthanasias and Deaths

Test Article (dosage) 1M 2M 3M 4M 1F 2F 3F 4F

‑‑‑‑‑‑‑‑‑‑‑‑‑‑‑‑‑‑‑‑‑‑‑‑‑‑‑ ‑‑‑‑‑‑‑‑ ‑‑ ‑‑ ‑‑ ‑‑ ‑‑ ‑‑ ‑‑ ‑‑

Benzonatate (PF‑00345410) mg/kg/day 0 10 30 90 0 5 15 50

‑‑‑‑‑‑‑‑‑‑‑‑‑‑‑‑‑‑‑‑‑‑‑‑‑‑‑‑‑‑‑‑‑‑‑‑‑‑‑‑‑‑‑‑‑‑‑‑‑‑‑‑‑‑‑‑‑‑‑‑‑‑‑‑‑‑‑‑‑‑‑‑‑‑‑‑‑‑‑‑‑‑‑‑‑‑‑‑‑‑‑‑‑‑‑‑‑‑‑‑‑‑‑‑‑‑‑‑

Tissue/ Group/Subgroup/Sex: 1/1/M 2/1/M 3/1/M 4/1/M 1/1/F 2/1/F 3/1/F 4/1/F

Observation Number of Animals:  22  26  19  27  30  27  26  25

‑‑‑‑‑‑‑‑‑‑‑‑‑‑‑‑‑‑‑‑‑‑‑‑‑‑‑‑‑‑‑‑‑‑‑‑‑‑‑‑‑‑‑‑‑‑‑‑‑‑‑‑‑‑‑‑‑‑‑‑‑‑‑‑‑‑‑‑‑‑‑‑‑‑‑‑‑‑‑‑‑‑‑‑‑‑‑‑‑‑‑‑‑‑‑‑‑‑‑‑‑‑‑‑‑‑‑‑

Pituitary Number Examined:  21  26  19  27  30  27  26  25

Unremarkable:   8   9   9  14   3   6   6   7

Cyst, craniopharyngeal

finding not present ‑  21  26  19  26  30  27  26  25

slight 2   0   0   0   1   0   0   0   0

Total Incidence:   0   0   0   1   0   0   0   0

Average Severity:   0.0   0.0   0.0   2.0   0.0   0.0   0.0   0.0

Hematopoiesis, increased

finding not present ‑  21  26  19  27  30  27  26  24

slight 2   0   0   0   0   0   0   0   1

Total Incidence:   0   0   0   0   0   0   0   1

Average Severity:   0.0   0.0   0.0   0.0   0.0   0.0   0.0   2.0

Hemorrhage

finding not present ‑  21  26  19  27  30  27  26  24

slight 2   0   0   0   0   0   0   0   1

Total Incidence:   0   0   0   0   0   0   0   1

Average Severity:   0.0   0.0   0.0   0.0   0.0   0.0   0.0   2.0

‑‑‑‑‑‑‑‑‑‑‑‑‑‑‑‑‑‑‑‑‑‑‑‑‑‑‑‑‑‑‑‑‑‑‑‑‑‑‑‑‑‑‑‑‑‑‑‑‑‑‑‑‑‑‑‑‑‑‑‑‑‑‑‑‑‑‑‑‑‑‑‑‑‑‑‑‑‑‑‑‑‑‑‑‑‑‑‑‑‑‑‑‑‑‑‑‑‑‑‑‑‑‑‑‑‑‑

Table

Summary of Severity for Selected Microscopic Observations

Unscheduled Euthanasias and Deaths

Test Article (dosage) 1M 2M 3M 4M 1F 2F 3F 4F

‑‑‑‑‑‑‑‑‑‑‑‑‑‑‑‑‑‑‑‑‑‑‑‑‑‑‑ ‑‑‑‑‑‑‑‑ ‑‑ ‑‑ ‑‑ ‑‑ ‑‑ ‑‑ ‑‑ ‑‑

Benzonatate (PF‑00345410) mg/kg/day 0 10 30 90 0 5 15 50

‑‑‑‑‑‑‑‑‑‑‑‑‑‑‑‑‑‑‑‑‑‑‑‑‑‑‑‑‑‑‑‑‑‑‑‑‑‑‑‑‑‑‑‑‑‑‑‑‑‑‑‑‑‑‑‑‑‑‑‑‑‑‑‑‑‑‑‑‑‑‑‑‑‑‑‑‑‑‑‑‑‑‑‑‑‑‑‑‑‑‑‑‑‑‑‑‑‑‑‑‑‑‑‑‑‑‑‑

Tissue/ Group/Subgroup/Sex: 1/1/M 2/1/M 3/1/M 4/1/M 1/1/F 2/1/F 3/1/F 4/1/F

Observation Number of Animals:  22  26  19  27  30  27  26  25

‑‑‑‑‑‑‑‑‑‑‑‑‑‑‑‑‑‑‑‑‑‑‑‑‑‑‑‑‑‑‑‑‑‑‑‑‑‑‑‑‑‑‑‑‑‑‑‑‑‑‑‑‑‑‑‑‑‑‑‑‑‑‑‑‑‑‑‑‑‑‑‑‑‑‑‑‑‑‑‑‑‑‑‑‑‑‑‑‑‑‑‑‑‑‑‑‑‑‑‑‑‑‑‑‑‑‑‑

Pituitary Number Examined:  21  26  19  27  30  27  26  25

Unremarkable:   8   9   9  14   3   6   6   7

Hyperplasia

finding not present ‑  18  24  18  25  25  25  25  25

slight 2   3   0   1   1   3   1   0   0

moderate 3   0   2   0   0   2   1   1   0

marked 4   0   0   0   1   0   0   0   0
[truncated: 1,947,568 more chars]
